# Supplementary material
Source: PubMed Central journal article supplement (PMC134625)
Supplement: gb-2002-3-10-research0058-s1.pdf [file gb-2002-3-10-research0058-s1.pdf]

| Sense Seq. |       | $P_3$ |       | $G_3/(G_3+C_3)$ |      |       | $A_3/(A_3+T_3)$ |      |       | Midpoint |      | Difference in PR2-bias |       |       |          |             |
|------------|-------|-------|-------|-----------------|------|-------|-----------------|------|-------|----------|------|------------------------|-------|-------|----------|-------------|
| Chromosome | #lead | #lagg | Lead  | Lagg            | Sig. | $x_l$ | $x_2$           | Sig. | $y_l$ | $y_2$    | Sig. | $x_c$                  | $y_c$ | $B_I$ | $B_{II}$ | $B_I$ %     |
| B. hal     | 2689  | 869   | 0.404 | 0.402           | ns   | 0.530 | 0.438           | ***  | 0.478 | 0.477    | ns   | 0.484                  | 0.477 | 0.092 | 0.028    | 76.9        |
| B. sub     | 2705  | 924   | 0.422 | 0.429           | *    | 0.504 | 0.428           | ***  | 0.473 | 0.480    | **   | 0.466                  | 0.476 | 0.076 | 0.041    | <b>64.9</b> |
| B. bur     | 505   | 267   | 0.192 | 0.205           | ***  | 0.626 | 0.280           | ***  | 0.362 | 0.555    | ***  | 0.453                  | 0.459 | 0.397 | 0.063    | <b>86.3</b> |
| Buch       | 298   | 225   | 0.122 | 0.124           | ns   | 0.473 | 0.380           | ***  | 0.442 | 0.485    | ***  | 0.426                  | 0.464 | 0.102 | 0.082    | <b>55.5</b> |
| C. cre     | 1861  | 1596  | 0.860 | 0.853           | **   | 0.435 | 0.405           | ***  | 0.303 | 0.361    | ***  | 0.420                  | 0.332 | 0.065 | 0.186    | <b>26.0</b> |
| C. jej     | 914   | 583   | 0.172 | 0.181           | ***  | 0.542 | 0.309           | ***  | 0.415 | 0.453    | ***  | 0.425                  | 0.434 | 0.236 | 0.100    | <b>70.3</b> |
| C. mur     | 403   | 340   | 0.313 | 0.321           | **   | 0.598 | 0.346           | ***  | 0.409 | 0.449    | ***  | 0.472                  | 0.429 | 0.255 | 0.076    | <b>77.0</b> |
| C. pne     | 532   | 436   | 0.323 | 0.342           | ***  | 0.505 | 0.360           | ***  | 0.421 | 0.454    | ***  | 0.433                  | 0.437 | 0.149 | 0.092    | <b>61.8</b> |
| C. pneAR39 | 468   | 385   | 0.323 | 0.341           | ***  | 0.506 | 0.364           | ***  | 0.423 | 0.454    | ***  | 0.435                  | 0.439 | 0.145 | 0.089    | <b>61.9</b> |
| C. pneJ138 | 541   | 441   | 0.323 | 0.342           | ***  | 0.503 | 0.360           | ***  | 0.420 | 0.454    | ***  | 0.431                  | 0.437 | 0.147 | 0.093    | <b>61.2</b> |
| C. tra     | 453   | 381   | 0.324 | 0.336           | ***  | 0.585 | 0.356           | ***  | 0.419 | 0.448    | ***  | 0.471                  | 0.434 | 0.231 | 0.073    | <b>76.1</b> |

|           |      |      |       |       |     |       |       |     |       |       |     |       |       |       |       |             |
|-----------|------|------|-------|-------|-----|-------|-------|-----|-------|-------|-----|-------|-------|-------|-------|-------------|
| D. rad1   | 1261 | 1162 | 0.804 | 0.798 | ns  | 0.444 | 0.449 | ns  | 0.428 | 0.463 | *** | 0.447 | 0.446 | 0.035 | 0.076 | 31.6        |
| D. rad2   | 207  | 139  | 0.818 | 0.832 | ns  | 0.440 | 0.448 | ns  | 0.435 | 0.440 | ns  | 0.444 | 0.438 | 0.009 | 0.084 | 10.1        |
| E. col    | 2146 | 1768 | 0.533 | 0.535 | ns  | 0.503 | 0.453 | *** | 0.397 | 0.410 | *** | 0.478 | 0.403 | 0.052 | 0.099 | <b>34.3</b> |
| E.colEDL  | 2707 | 1927 | 0.526 | 0.527 | ns  | 0.512 | 0.454 | *** | 0.398 | 0.415 | *** | 0.483 | 0.406 | 0.060 | 0.095 | <b>38.9</b> |
| E.colRIMD | 2733 | 1890 | 0.527 | 0.528 | ns  | 0.512 | 0.453 | *** | 0.399 | 0.415 | *** | .483  | .407  | .061  | .095  | <b>39.2</b> |
| H. inf    | 809  | 696  | 0.257 | 0.275 | *** | 0.484 | 0.403 | *** | 0.451 | 0.473 | *** | 0.444 | 0.462 | 0.084 | 0.068 | <b>55.3</b> |
| H. pyl    | 805  | 587  | 0.404 | 0.403 | ns  | 0.478 | 0.419 | *** | 0.439 | 0.441 | ns  | 0.449 | 0.440 | 0.060 | 0.079 | 42.9        |
| H. pylJ99 | 782  | 590  | 0.413 | 0.408 | ns  | 0.479 | 0.415 | *** | 0.441 | 0.441 | ns  | 0.447 | 0.441 | 0.064 | 0.079 | 44.6        |
| L.lac     | 1628 | 391  | 0.226 | 0.242 | *** | 0.468 | 0.343 | *** | 0.452 | 0.425 | *** | 0.406 | 0.439 | 0.128 | 0.113 | <b>53.1</b> |
| M.lep     | 1473 | 958  | 0.640 | 0.635 | ns  | 0.487 | 0.418 | *** | 0.384 | 0.505 | *** | 0.453 | 0.445 | 0.139 | 0.073 | <b>65.6</b> |
| M. tub    | 2153 | 1535 | 0.786 | 0.788 | ns  | 0.467 | 0.423 | *** | 0.412 | 0.476 | *** | 0.445 | 0.444 | 0.078 | 0.079 | <b>49.9</b> |
| M.tubCDC  | 2153 | 1499 | 0.782 | 0.784 | ns  | 0.470 | 0.424 | *** | 0.412 | 0.476 | *** | 0.447 | 0.444 | 0.079 | 0.077 | <b>50.5</b> |
| M. gen    | 358  | 93   | 0.225 | 0.205 | **  | 0.429 | 0.419 | ns  | 0.430 | 0.439 | ns  | 0.424 | 0.435 | 0.014 | 0.100 | 11.9        |
| M. pne    | 520  | 139  | 0.404 | 0.401 | ns  | 0.427 | 0.410 | **  | 0.435 | 0.442 | ns  | 0.419 | 0.438 | 0.019 | 0.102 | 15.6        |
| M.pul     | 459  | 242  | 0.138 | 0.143 | *   | 0.339 | 0.330 | ns  | 0.475 | 0.468 | *   | 0.335 | 0.472 | 0.011 | 0.168 | 6.4         |

|           |      |      |       |       |     |       |       |     |       |       |     |       |       |       |       |             |
|-----------|------|------|-------|-------|-----|-------|-------|-----|-------|-------|-----|-------|-------|-------|-------|-------------|
| N. menA   | 880  | 873  | 0.596 | 0.601 | ns  | 0.423 | 0.348 | *** | 0.466 | 0.522 | *** | 0.385 | 0.494 | 0.094 | 0.115 | <b>44.9</b> |
| N. menB   | 910  | 716  | 0.578 | 0.610 | *** | 0.434 | 0.327 | *** | 0.454 | 0.536 | *** | 0.381 | 0.495 | 0.135 | 0.120 | <b>53.0</b> |
| P.mul     | 1111 | 795  | 0.318 | 0.330 | *** | 0.515 | 0.395 | *** | 0.456 | 0.470 | *** | 0.455 | 0.463 | 0.121 | 0.058 | <b>67.5</b> |
| P. aer    | 2920 | 2335 | 0.861 | 0.881 | *** | 0.433 | 0.376 | *** | 0.408 | 0.539 | *** | 0.404 | 0.474 | 0.143 | 0.099 | <b>59.0</b> |
| P. aby    | 965  | 798  | 0.512 | 0.511 | ns  | 0.535 | 0.507 | *** | 0.451 | 0.515 | *** | 0.521 | 0.483 | 0.070 | 0.027 | <b>72.4</b> |
| P. hor    | 1098 | 875  | 0.429 | 0.428 | ns  | 0.525 | 0.469 | *** | 0.444 | 0.490 | *** | 0.497 | 0.467 | 0.073 | 0.033 | <b>68.7</b> |
| R. pro    | 476  | 297  | 0.165 | 0.171 | **  | 0.572 | 0.407 | *** | 0.425 | 0.455 | *** | 0.490 | 0.440 | 0.168 | 0.061 | <b>73.4</b> |
| S.aur     | 1760 | 568  | 0.201 | 0.220 | *** | 0.494 | 0.341 | *** | 0.486 | 0.469 | *** | 0.417 | 0.477 | 0.154 | 0.086 | <b>64.3</b> |
| S.aurN315 | 1744 | 553  | 0.200 | 0.217 | *** | 0.496 | 0.335 | *** | 0.485 | 0.470 | *** | 0.415 | 0.477 | 0.162 | 0.087 | <b>64.9</b> |
| S.pyo     | 1196 | 314  | 0.294 | 0.308 | *** | 0.461 | 0.329 | *** | 0.430 | 0.424 | ns  | 0.395 | 0.427 | 0.132 | 0.128 | 50.8        |
| T. aci    | 763  | 625  | 0.557 | 0.560 | ns  | 0.476 | 0.453 | *** | 0.446 | 0.455 | **  | 0.465 | 0.451 | 0.025 | 0.061 | <b>28.8</b> |
| T. mar    | 905  | 781  | 0.524 | 0.523 | ns  | 0.480 | 0.443 | *** | 0.499 | 0.531 | *** | 0.461 | 0.515 | 0.049 | 0.041 | <b>54.4</b> |
| T. pal    | 596  | 321  | 0.527 | 0.558 | *** | 0.610 | 0.435 | *** | 0.343 | 0.439 | *** | 0.522 | 0.391 | 0.200 | 0.112 | <b>64.2</b> |
| U. ure    | 384  | 176  | 0.109 | 0.119 | *** | 0.426 | 0.362 | *** | 0.450 | 0.450 | ns  | 0.394 | 0.450 | 0.064 | 0.117 | 35.3        |
| V. cho1   | 1418 | 947  | 0.464 | 0.481 | *** | 0.505 | 0.414 | *** | 0.413 | 0.439 | *** | 0.460 | 0.426 | 0.095 | 0.084 | <b>52.9</b> |

|         |      |     |              |              |     |              |              |     |              |              |     |       |       |       |       |             |
|---------|------|-----|--------------|--------------|-----|--------------|--------------|-----|--------------|--------------|-----|-------|-------|-------|-------|-------------|
| V. cho2 | 516  | 354 | <b>0.443</b> | <b>0.478</b> | *** | <b>0.513</b> | <b>0.419</b> | *** | <b>0.415</b> | <b>0.441</b> | *** | 0.466 | 0.428 | 0.098 | 0.080 | <b>55.1</b> |
| X. fas  | 1190 | 851 | <b>0.541</b> | <b>0.568</b> | *** | <b>0.549</b> | <b>0.351</b> | *** | <b>0.332</b> | <b>0.528</b> | *** | 0.450 | 0.430 | 0.279 | 0.086 | <b>76.4</b> |

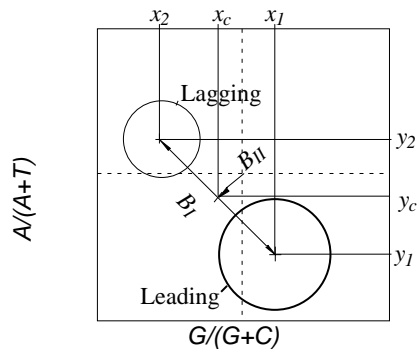

**Table 2. Base composition in third codon positions between the leading and the lagging strands.** Indices are defined in the material and method section. #lead and #lag are the number of genes in the leading and the lagging strand. The significance level (Sig.) for a difference between the two groups are: ns (not significant,  $p > 0.05$ ); \* ( $0.01 < p < 0.05$ ); \*\* ( $0.001 < p < 0.01$ ); \*\*\* ( $p < 0.001$ ). The contribution in percent of replication-associated effects to PR2 deviations ( $B_l$  %) is given in **bold** when both differences  $x_l - x_2$  and  $y_l - y_2$  are highly significant ( $p < 0.01$ ). When a difference is significant between the two groups a red color outlines the **highest** value and a blue color the lowest **value**.

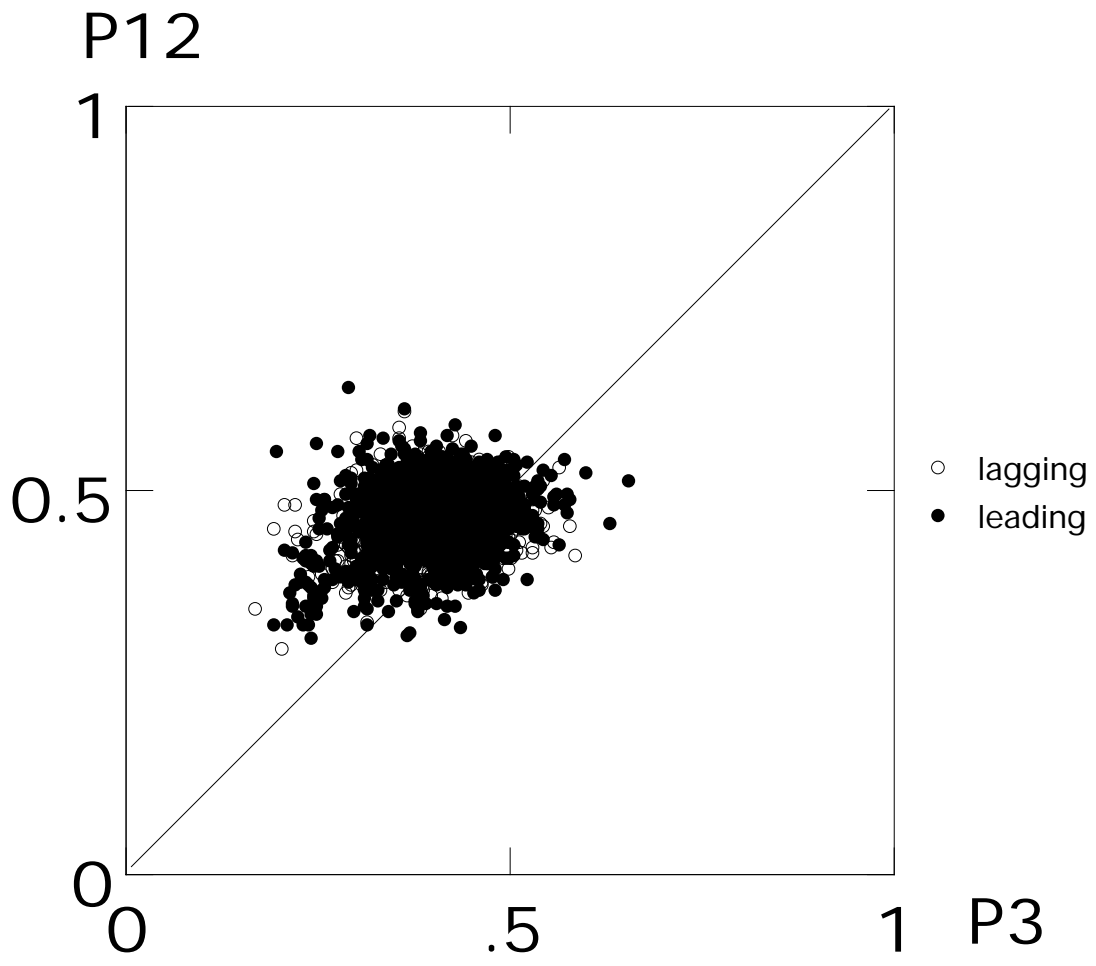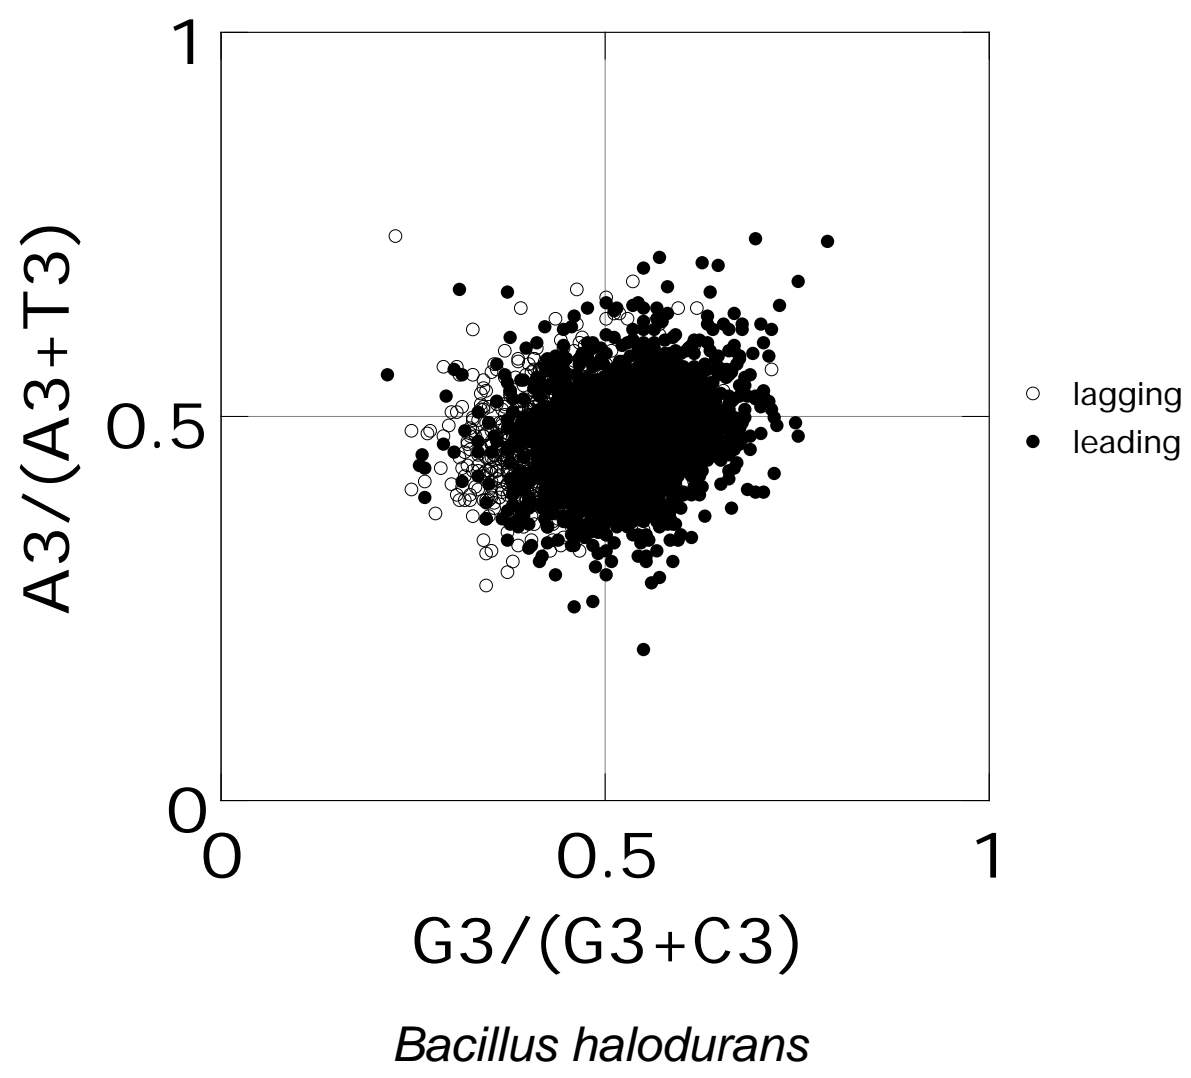

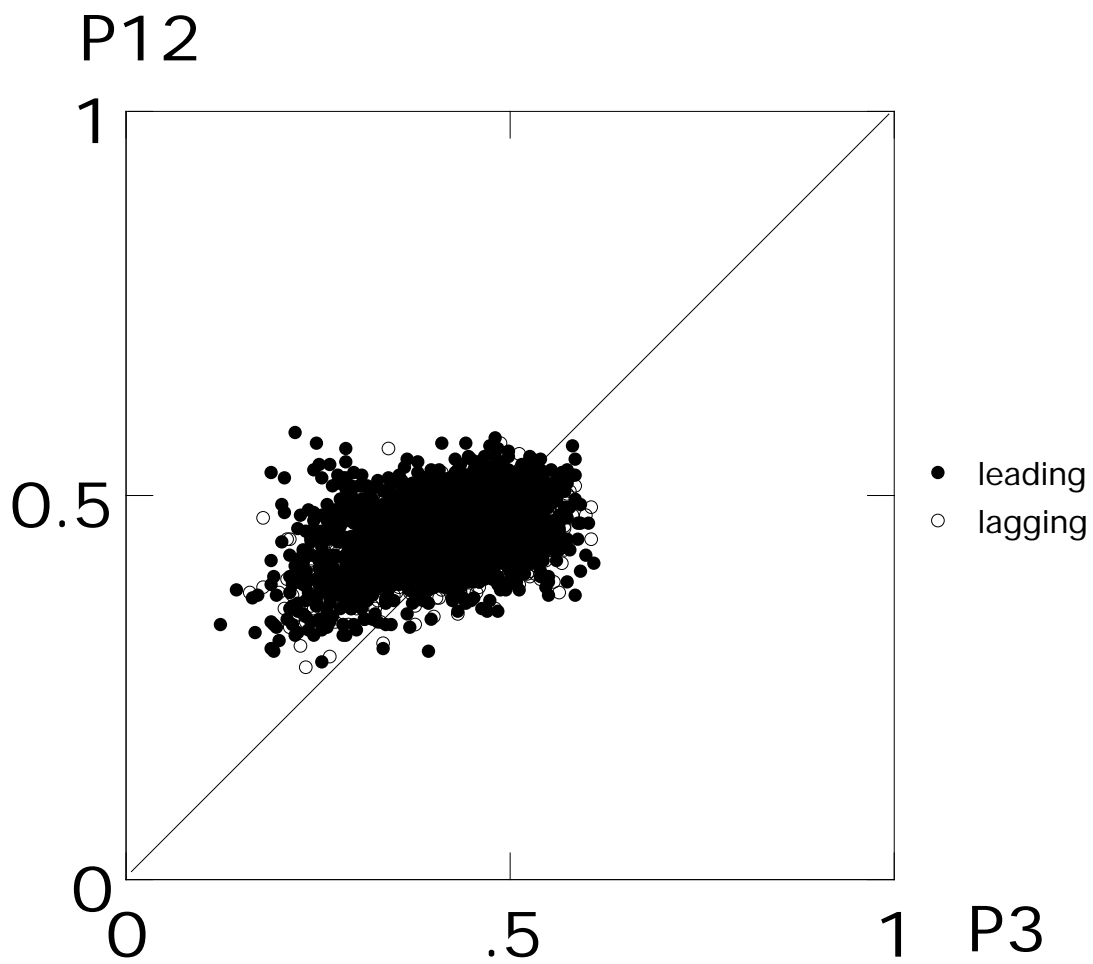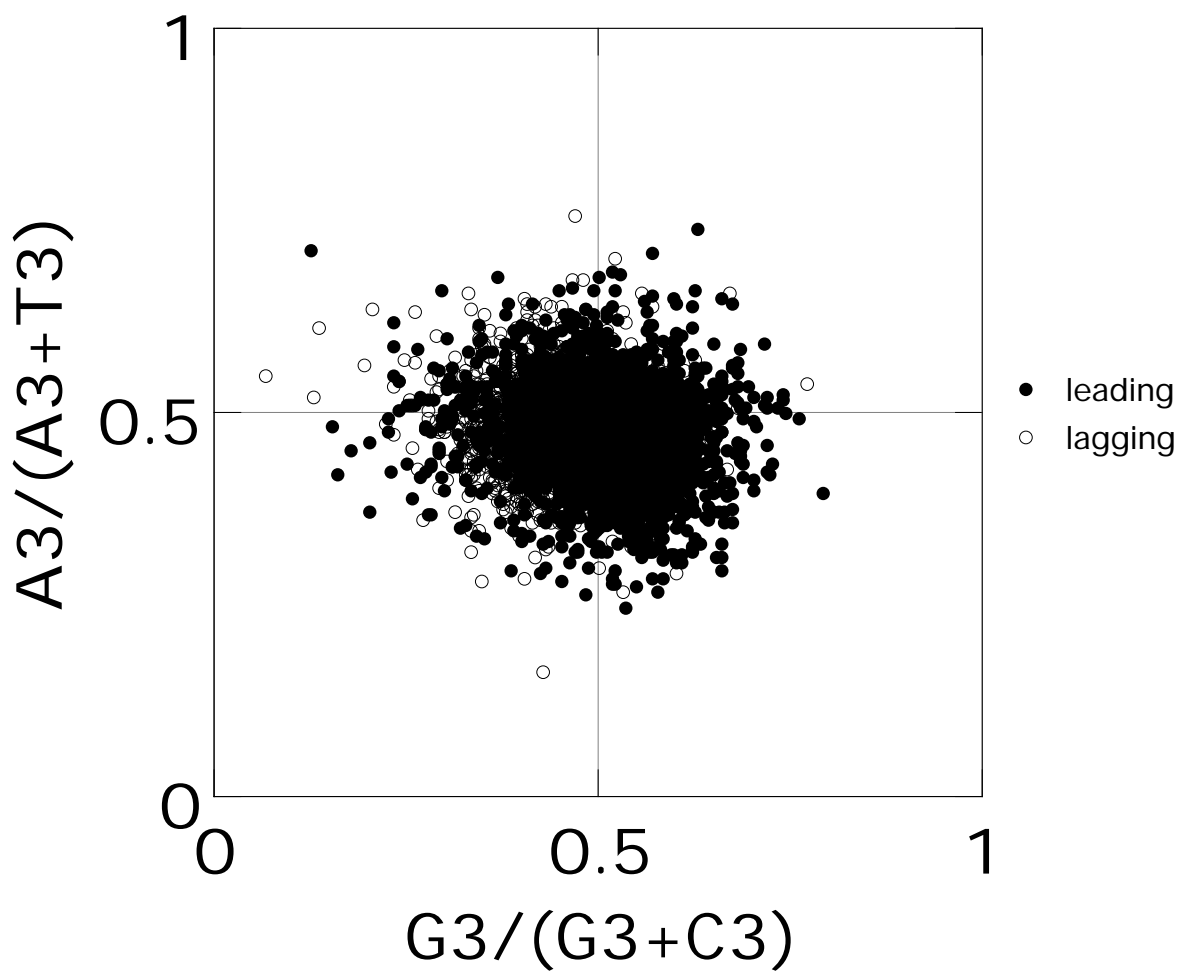

*Bacillus subtilis*

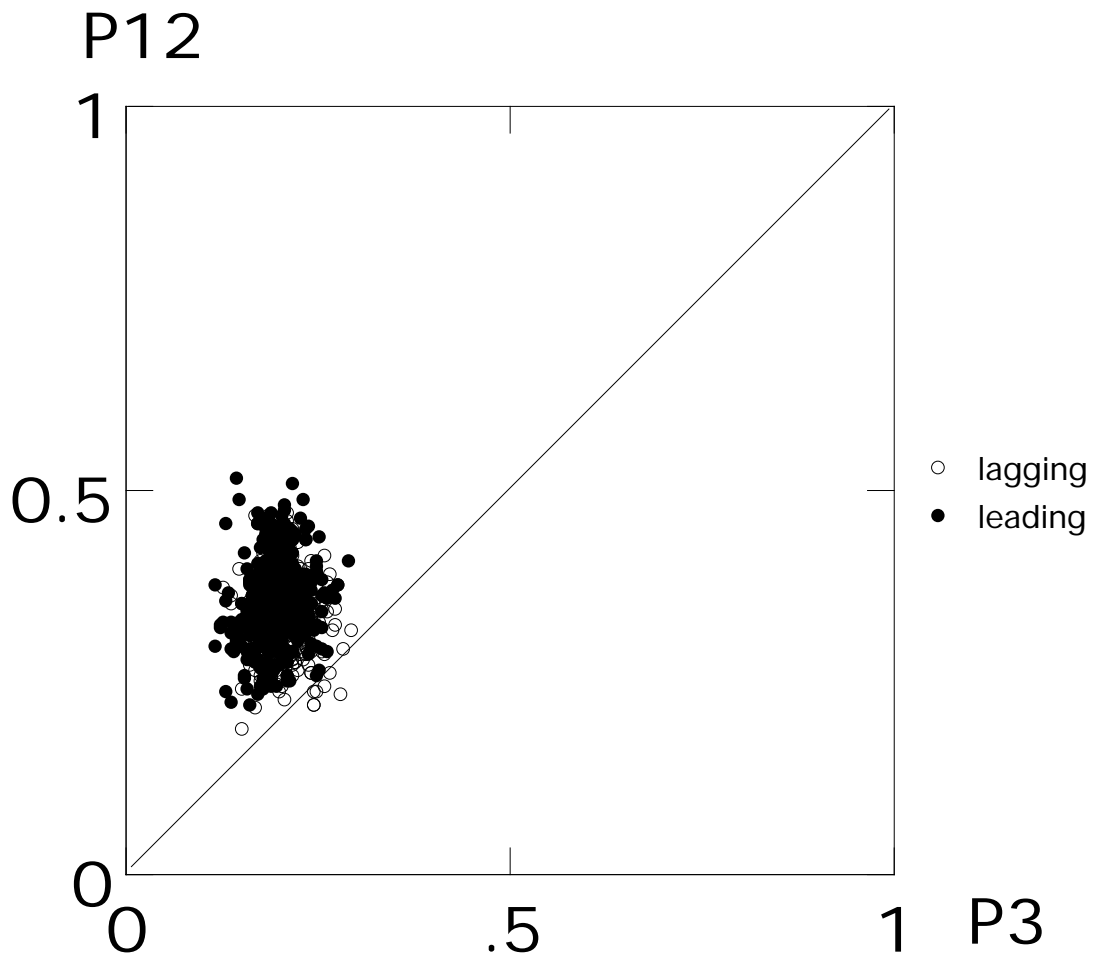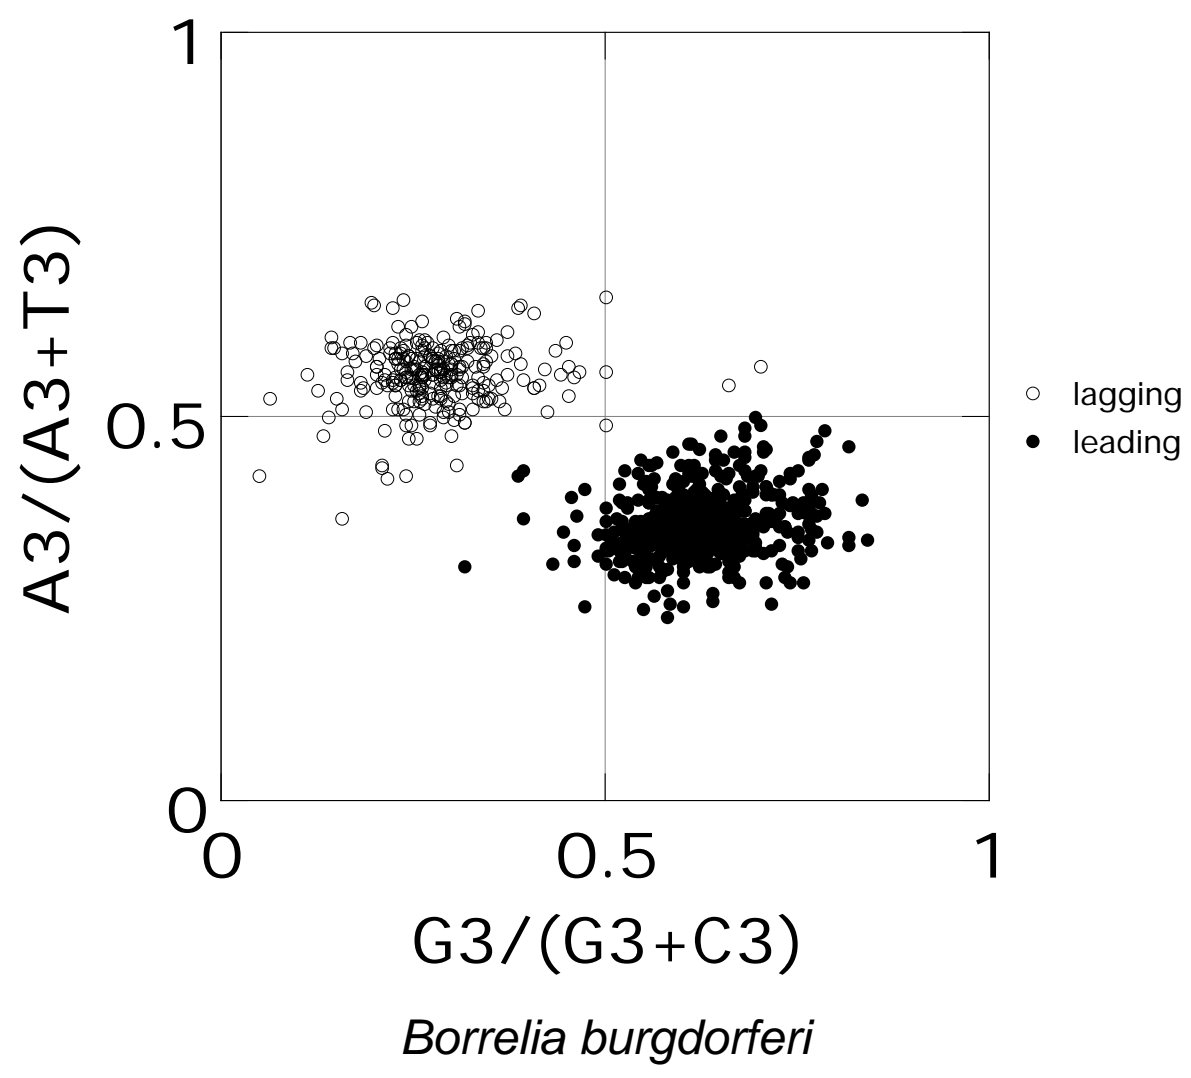

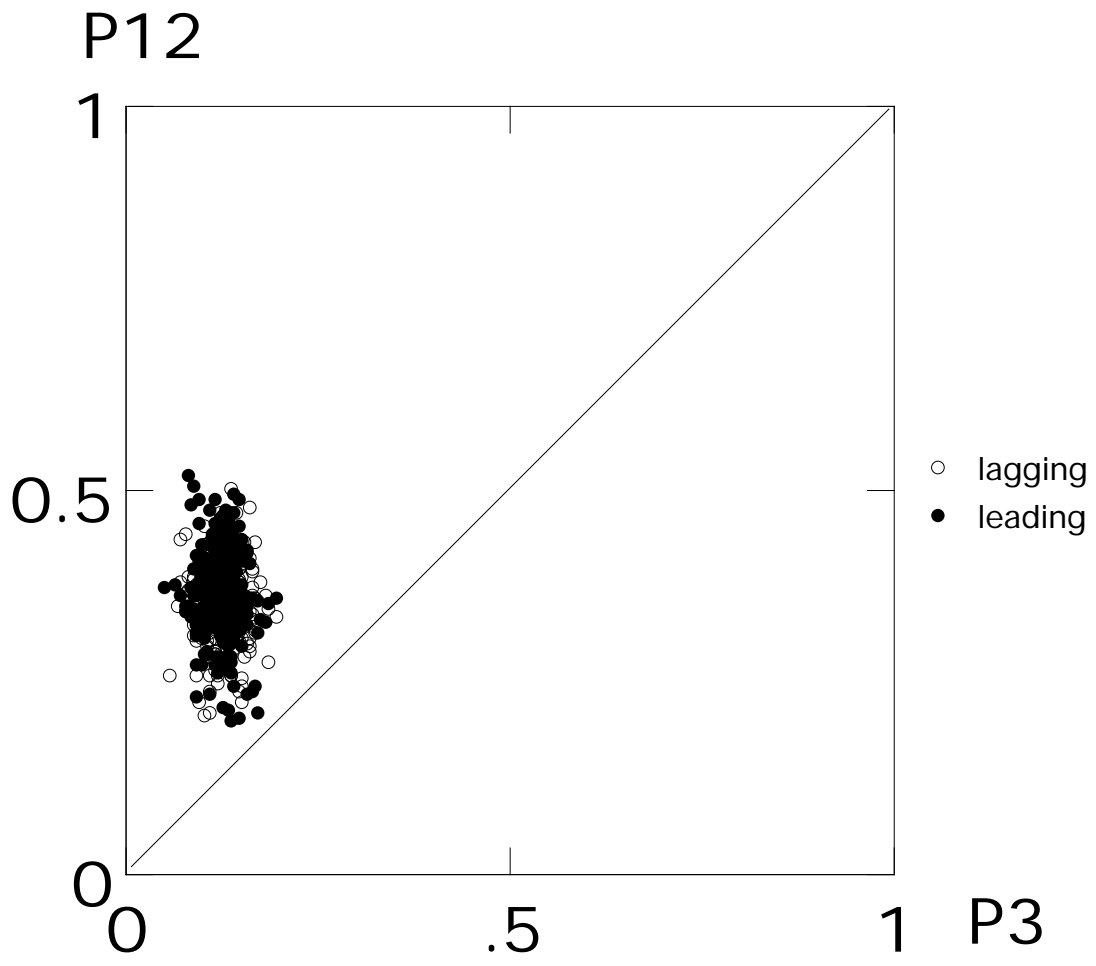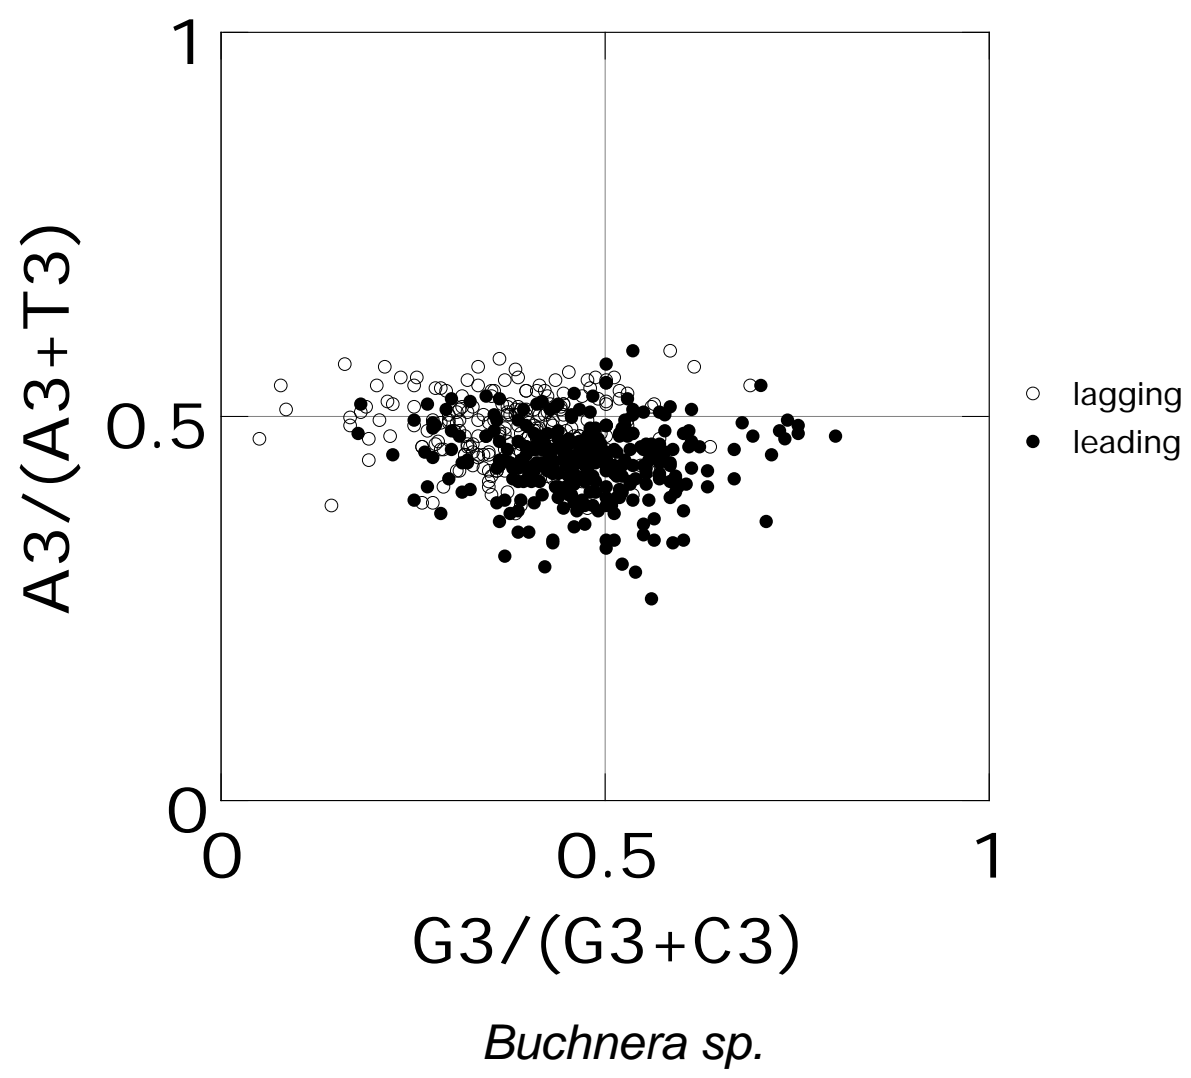



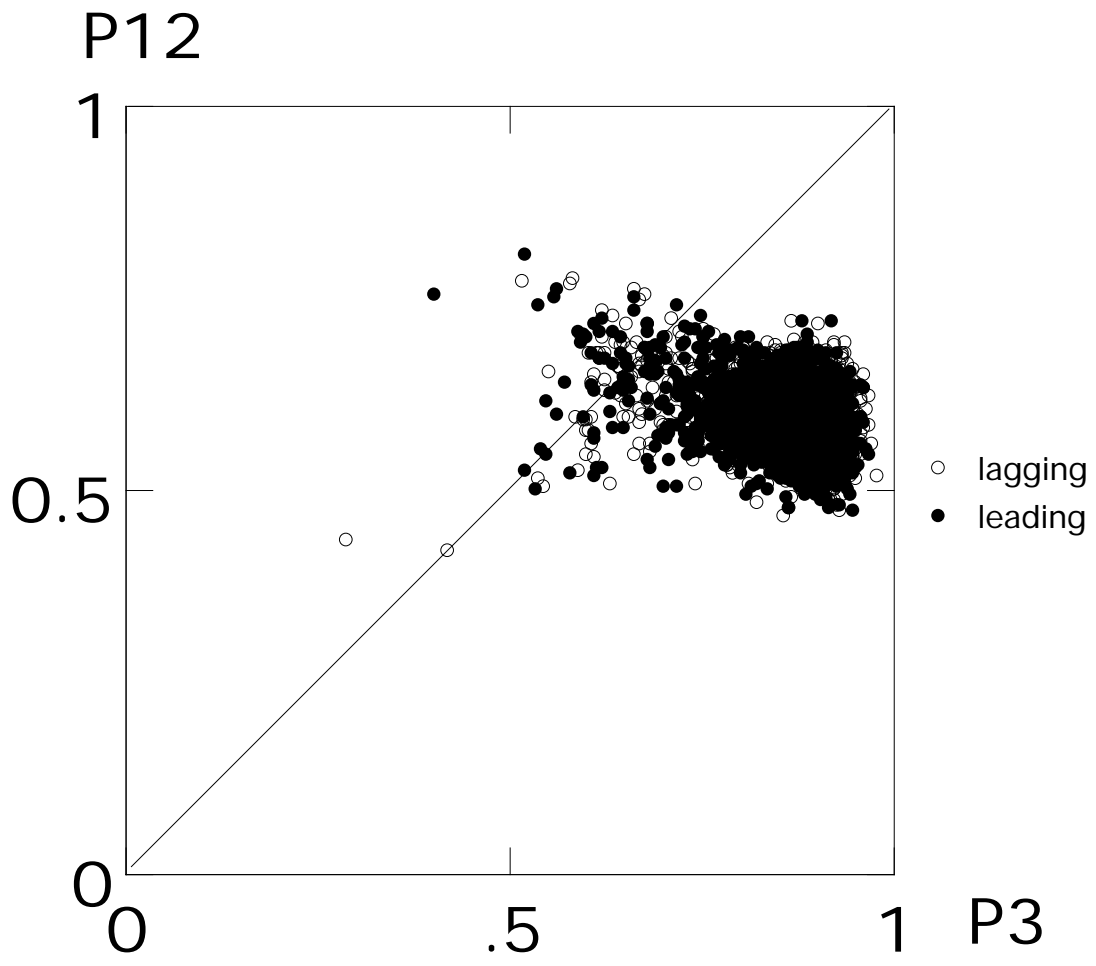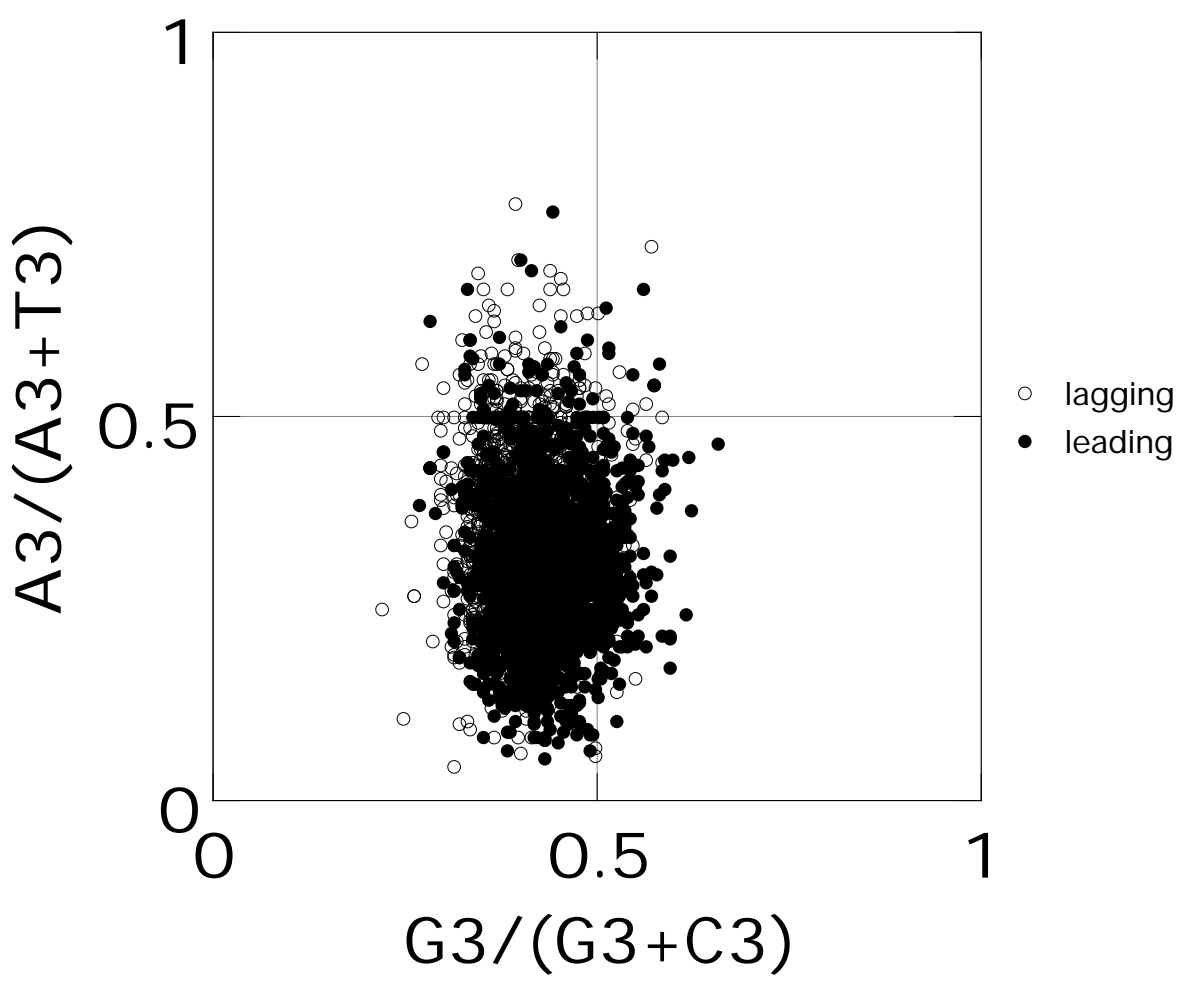

*Caulobacter crescentus*

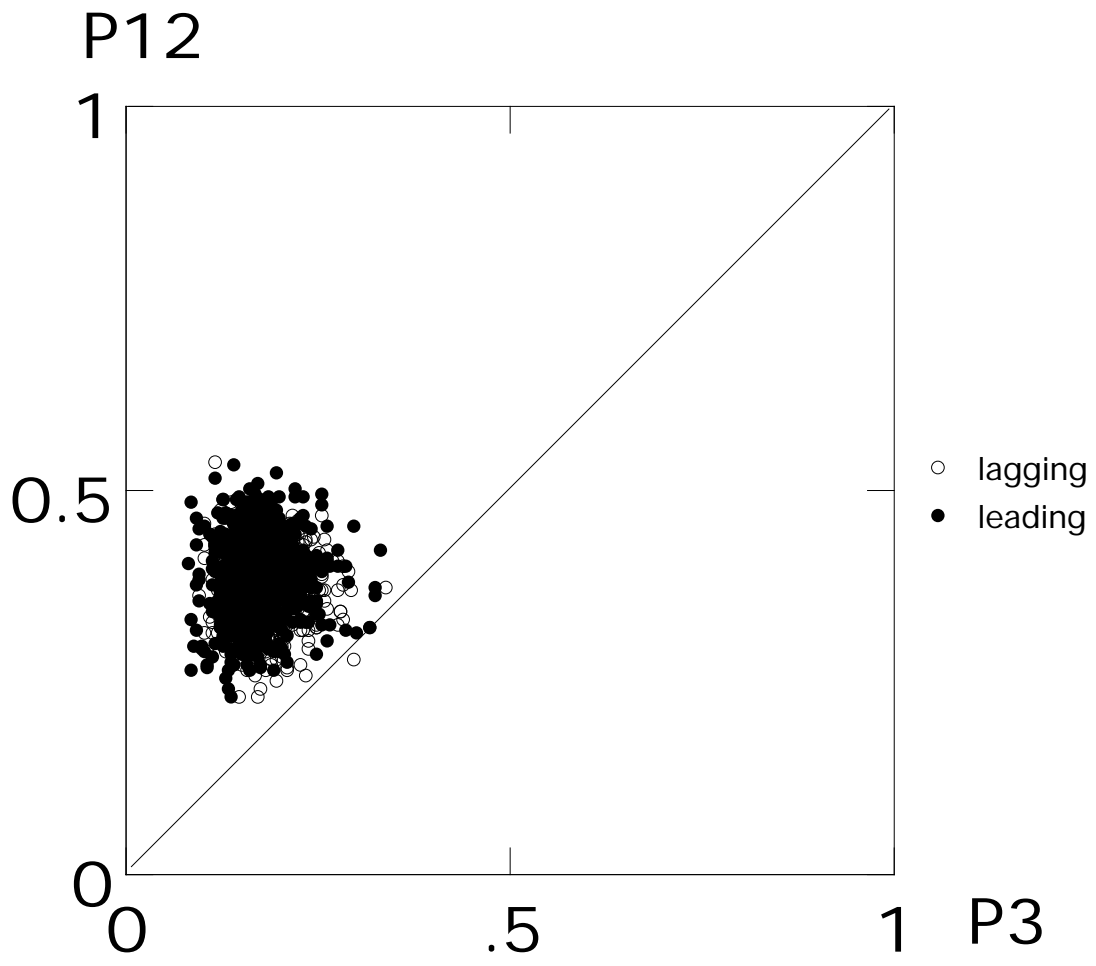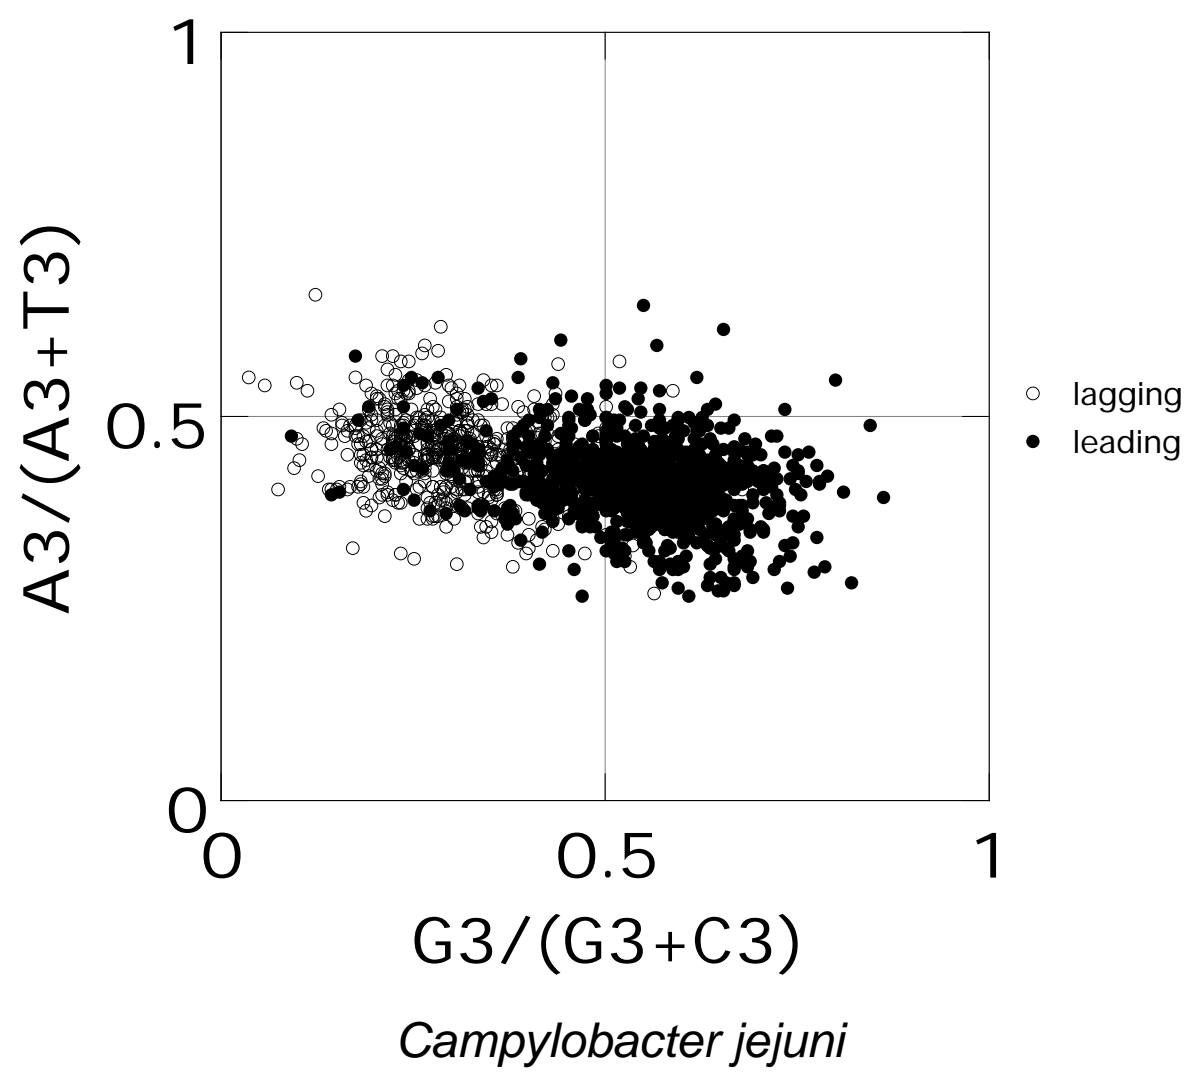

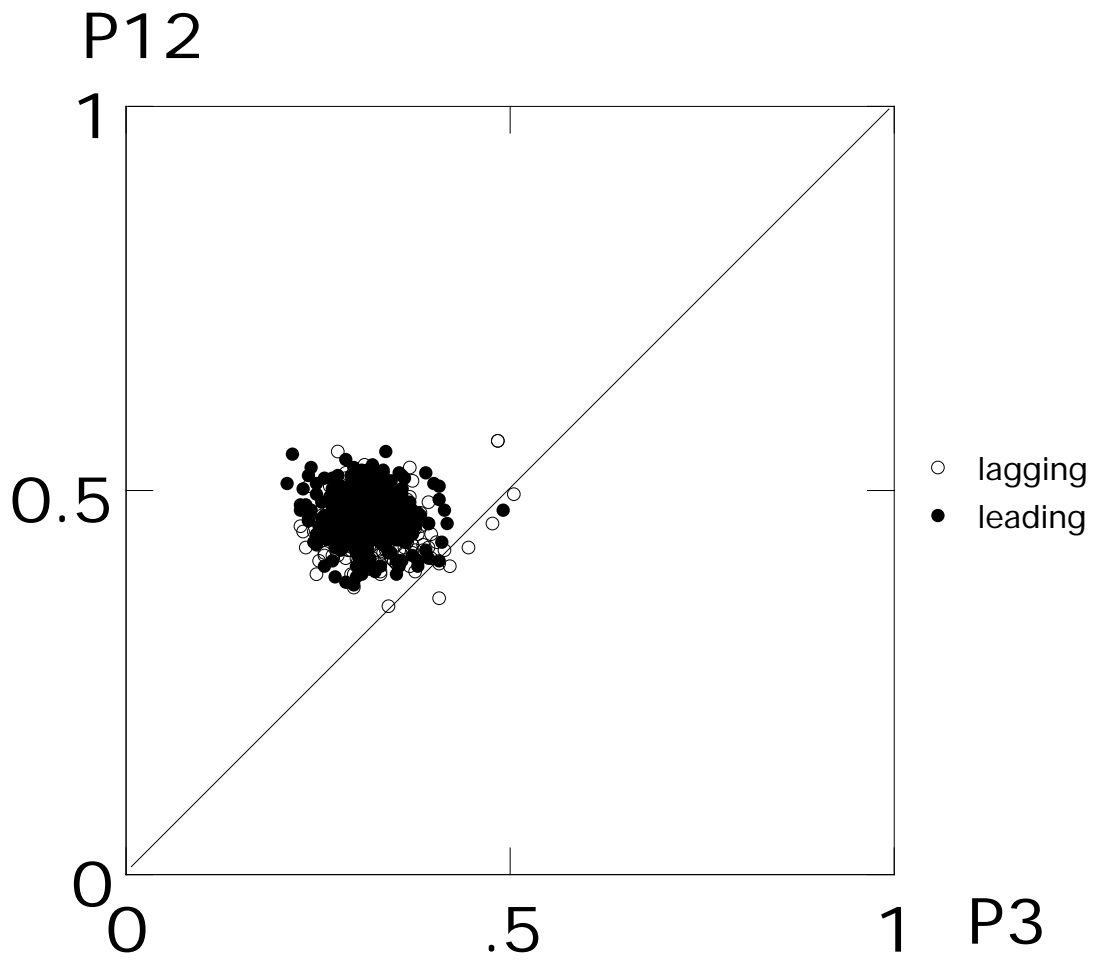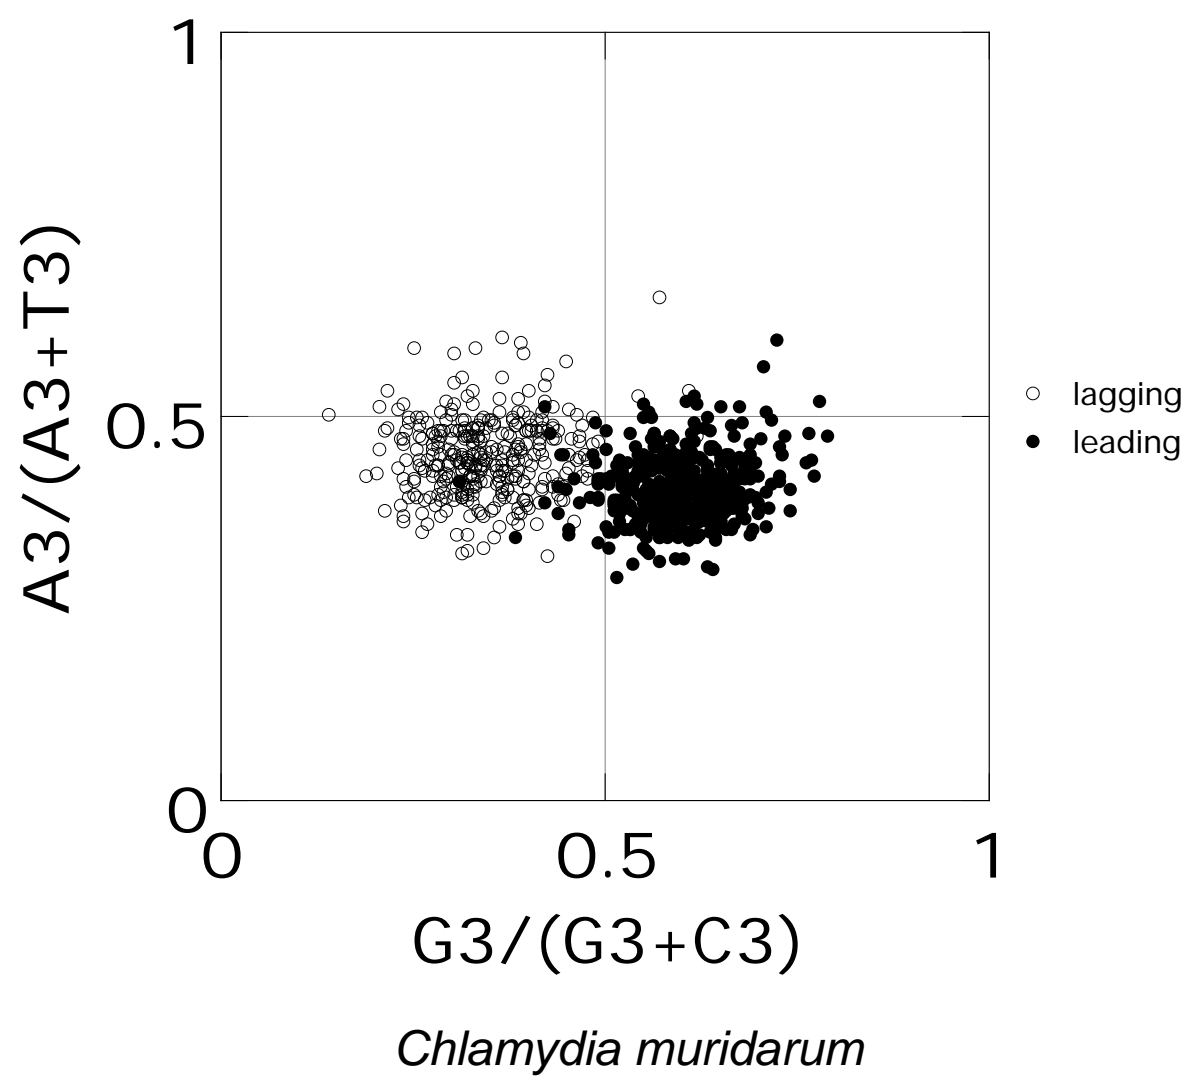

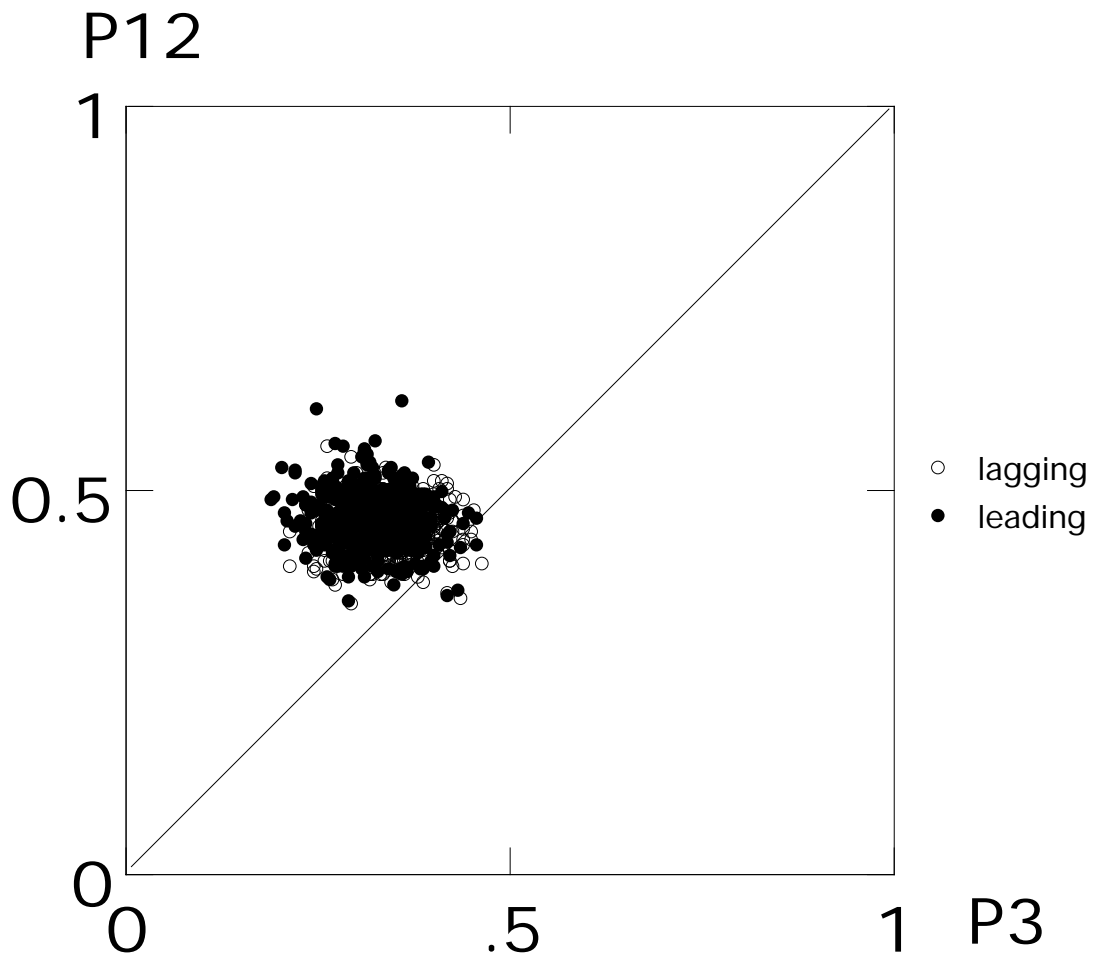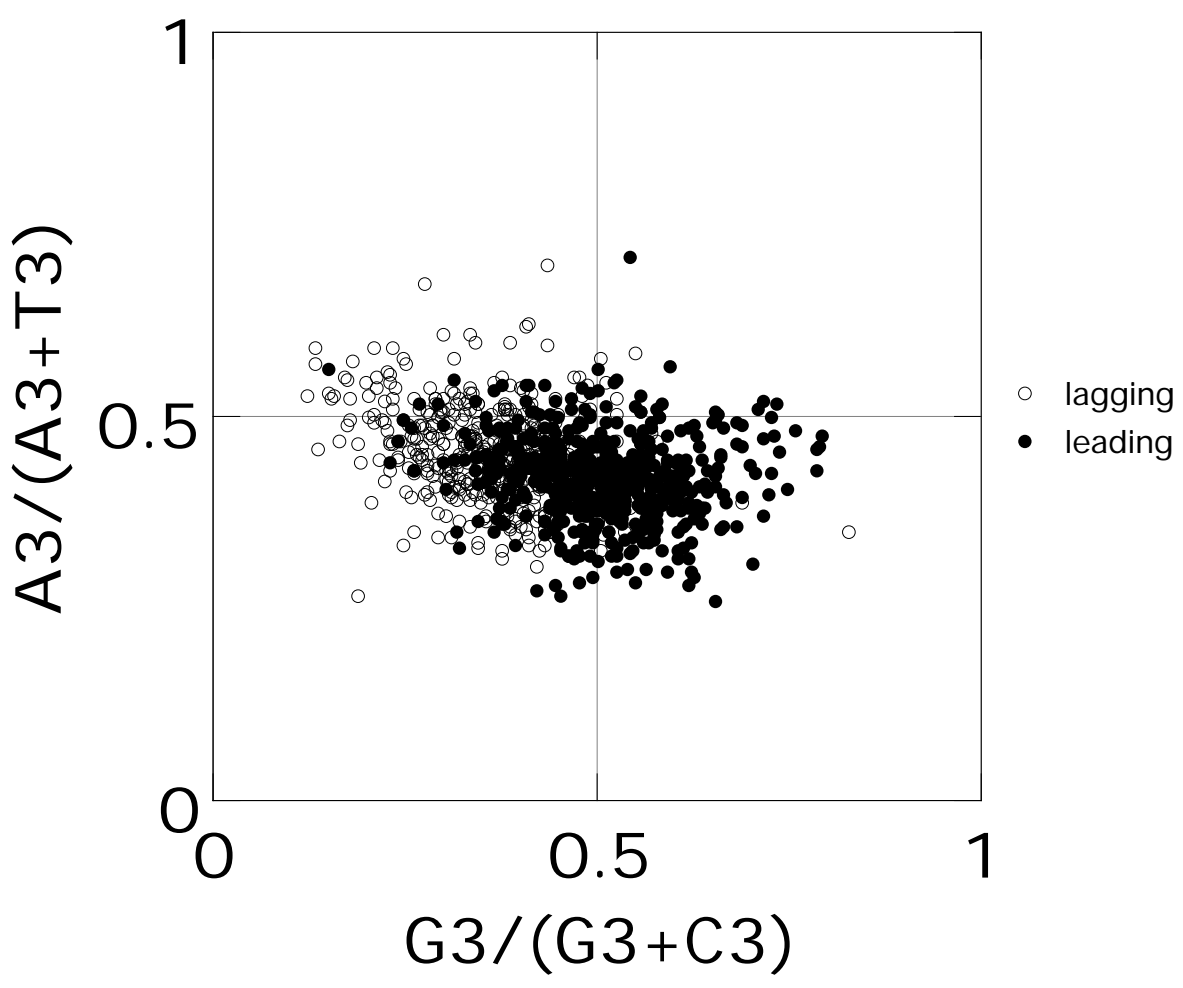

*Chlamydophila pneumoniae* CWL029

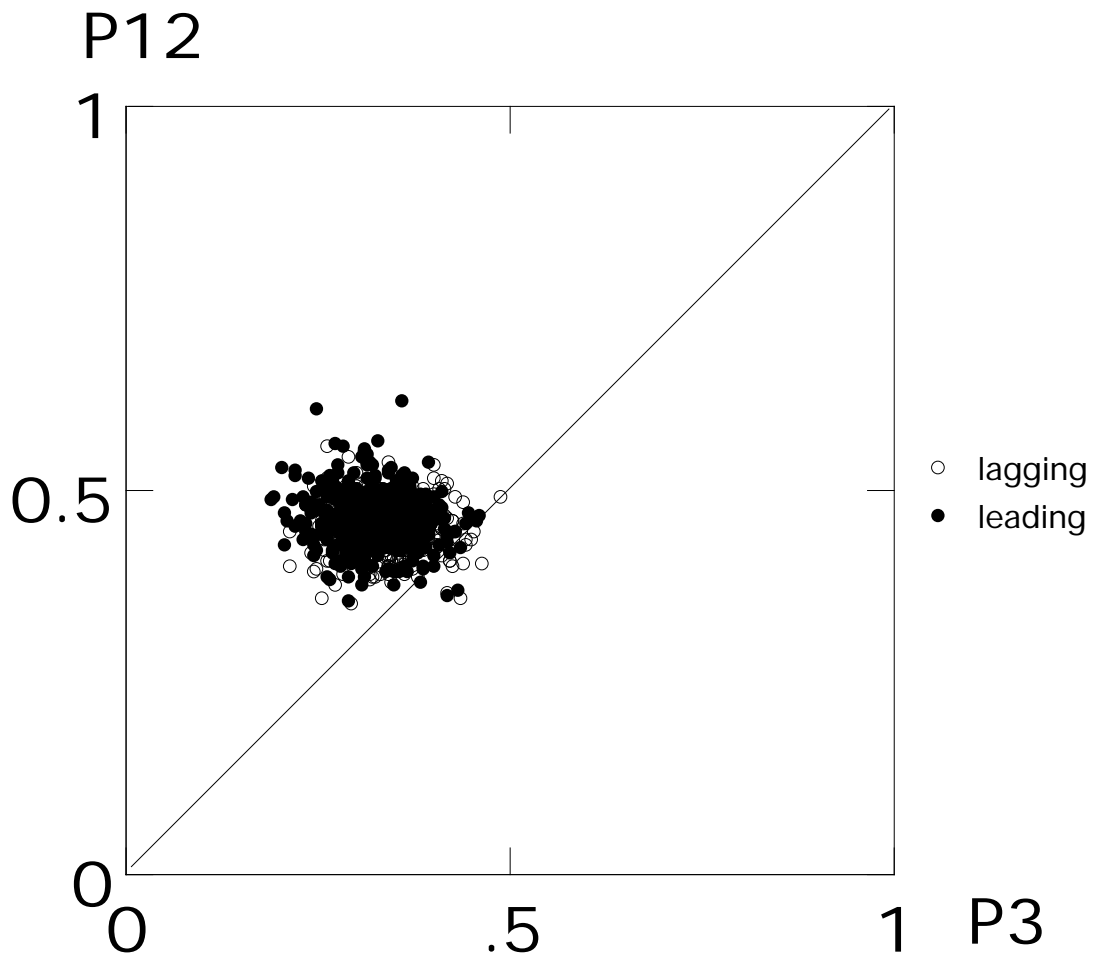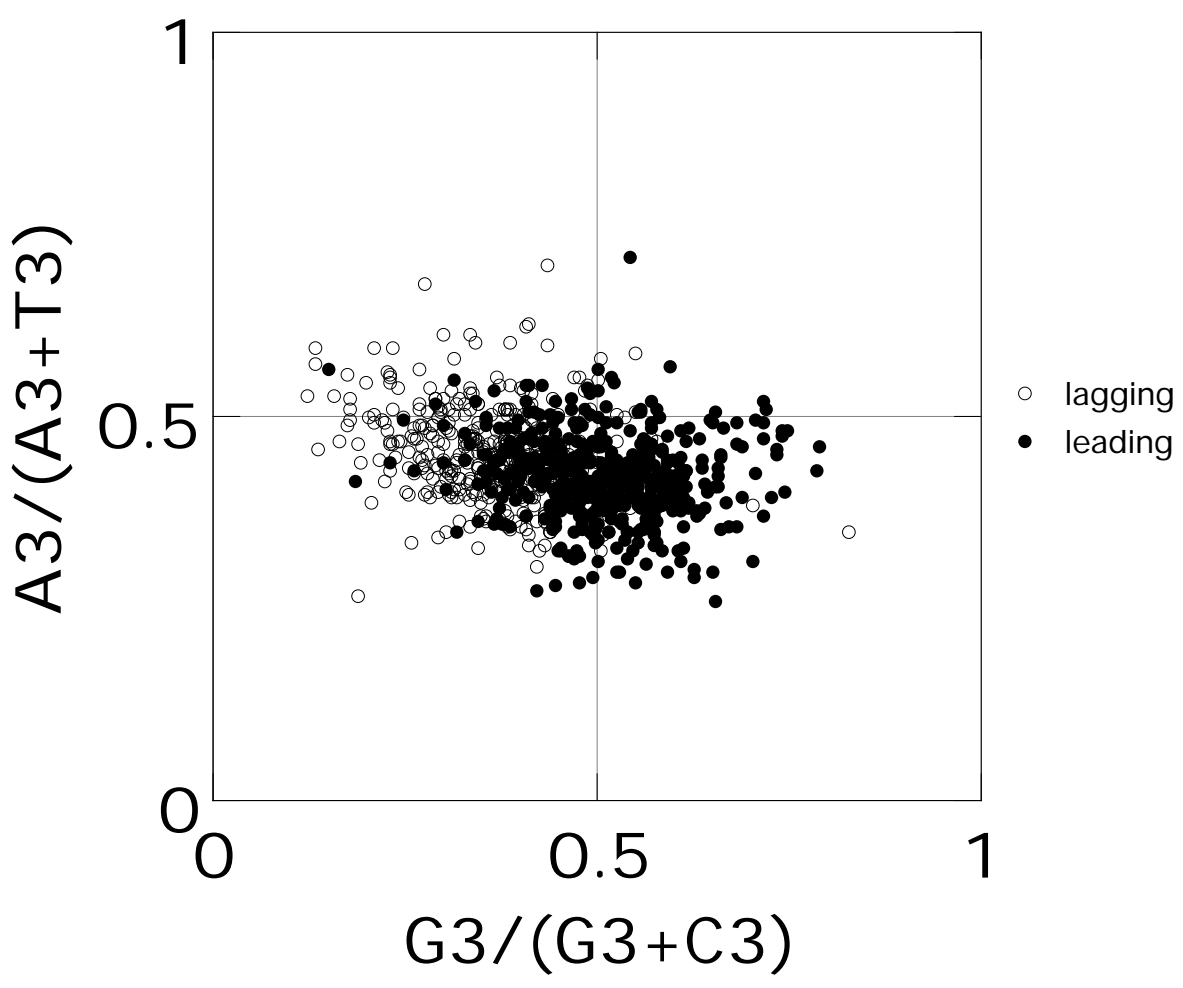

*Chlamydophila pneumoniae* AR39

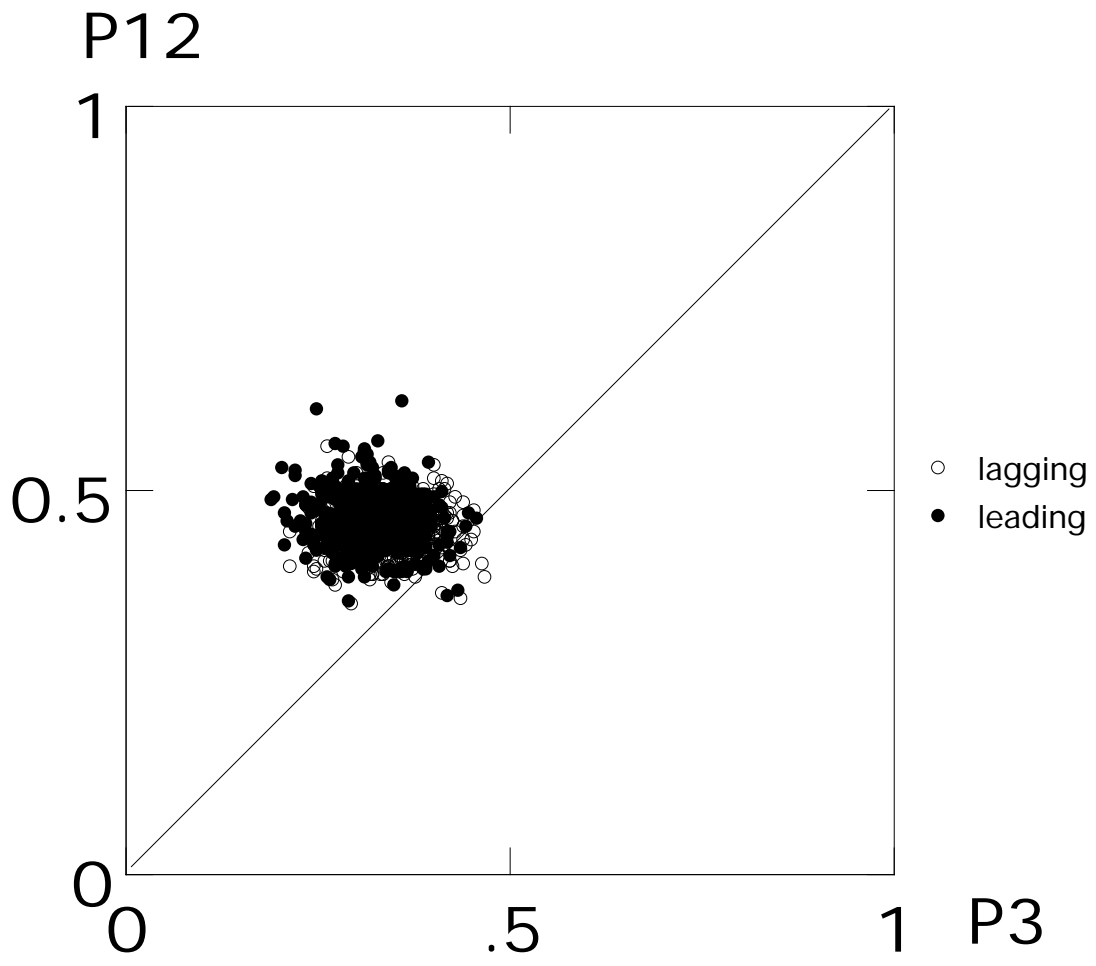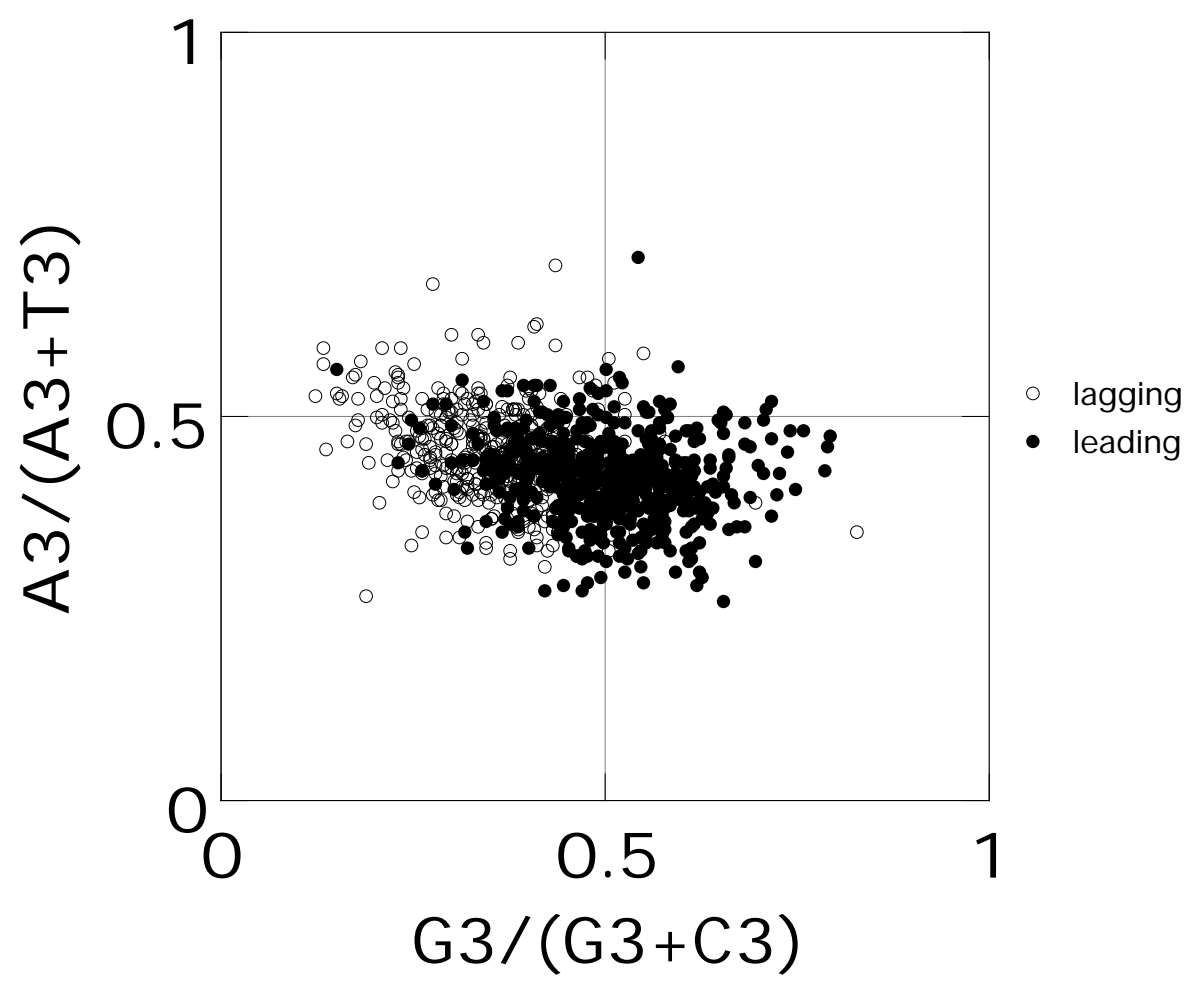

*Chlamydophila pneumoniae* J138

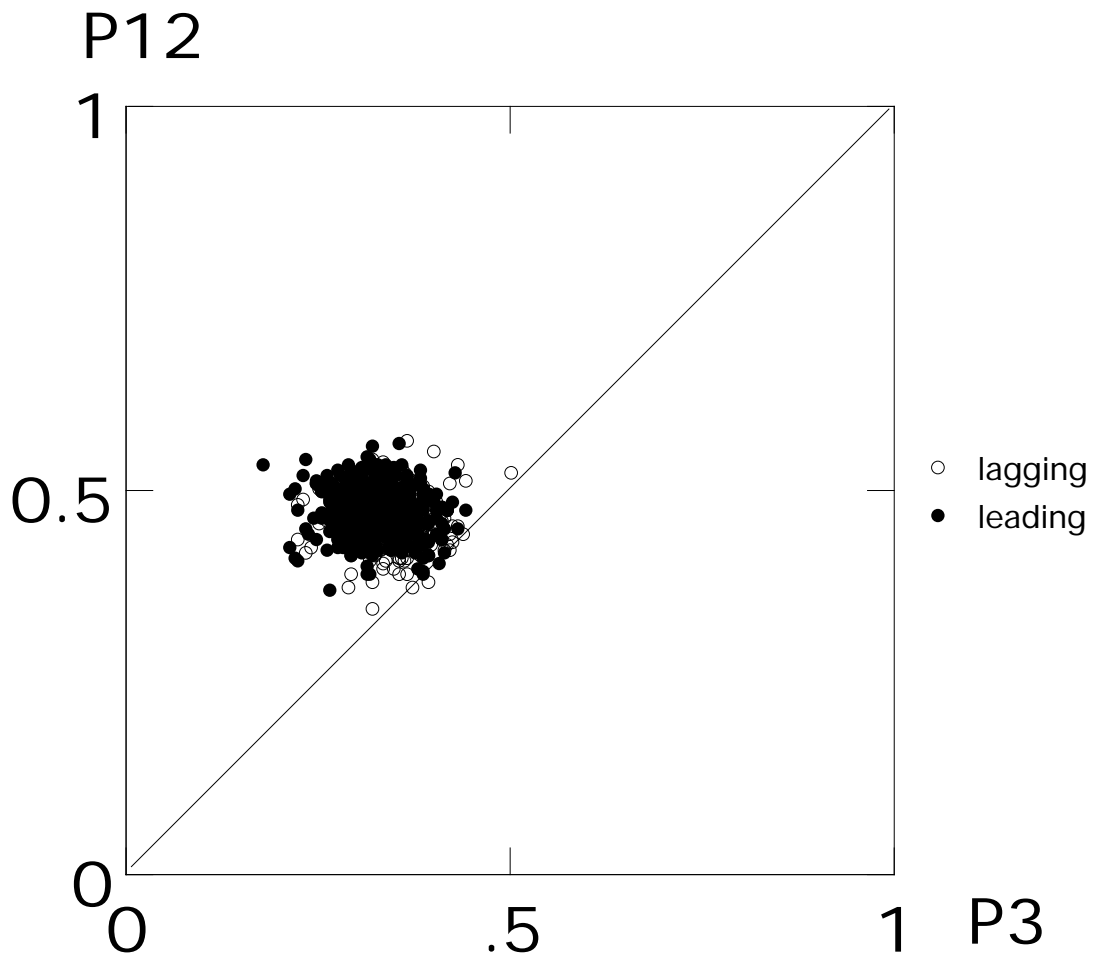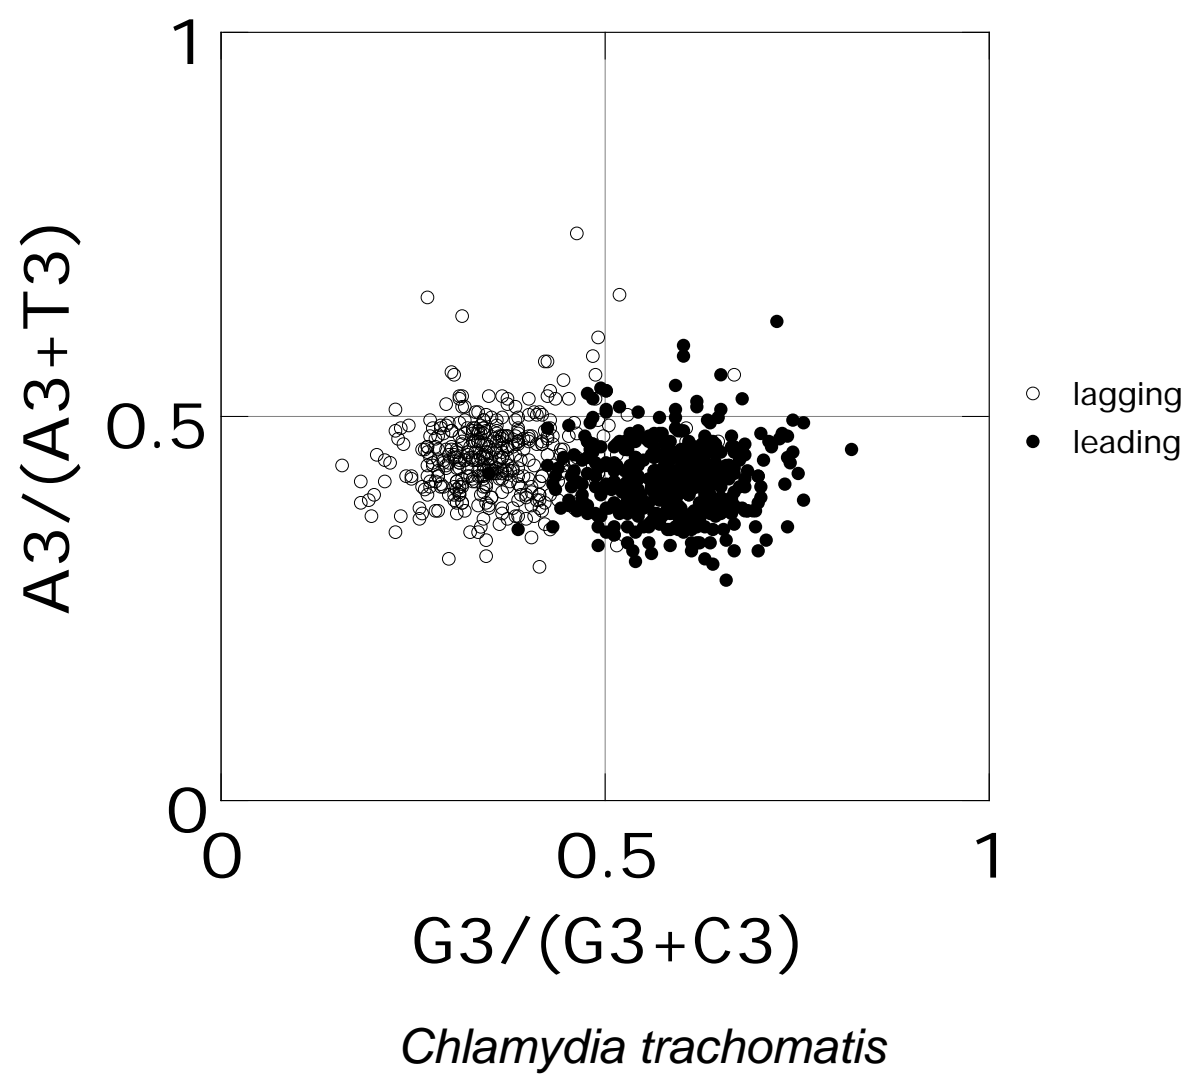

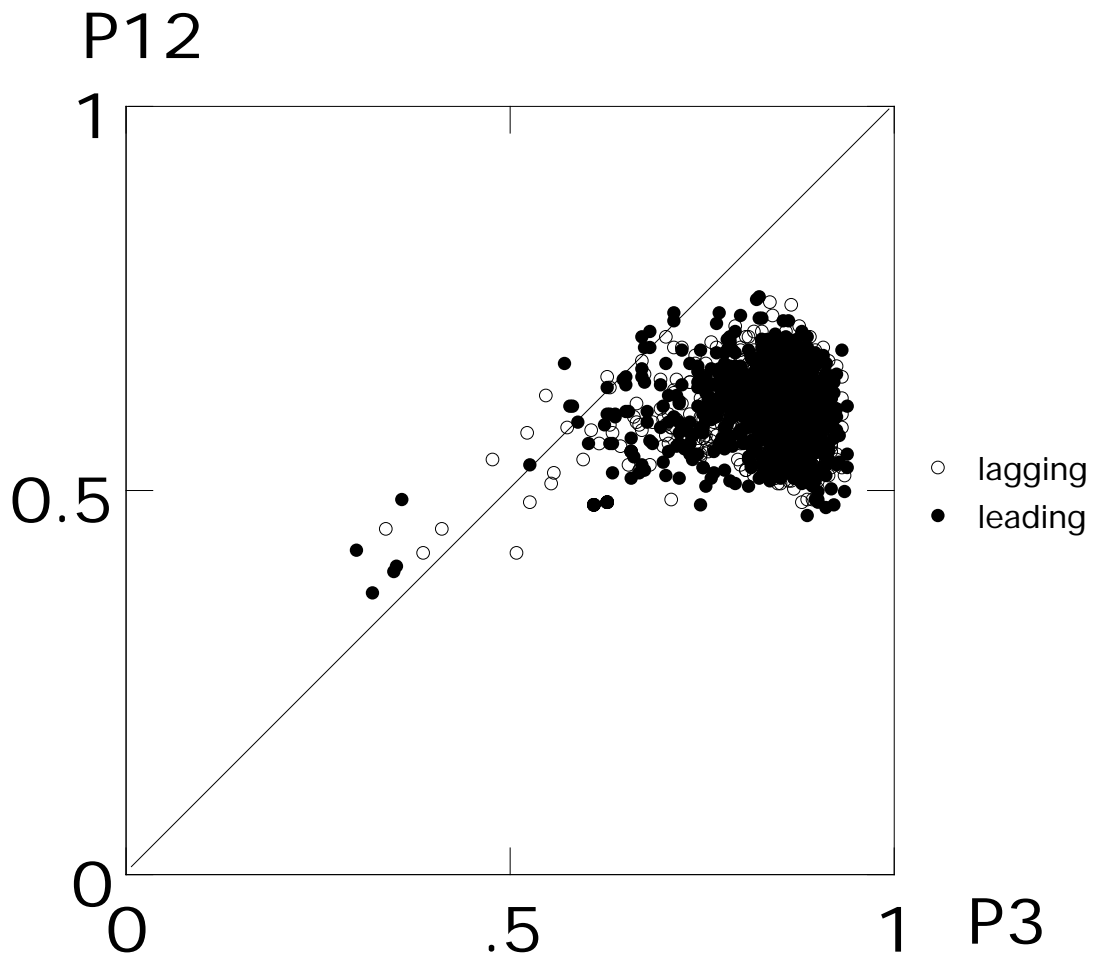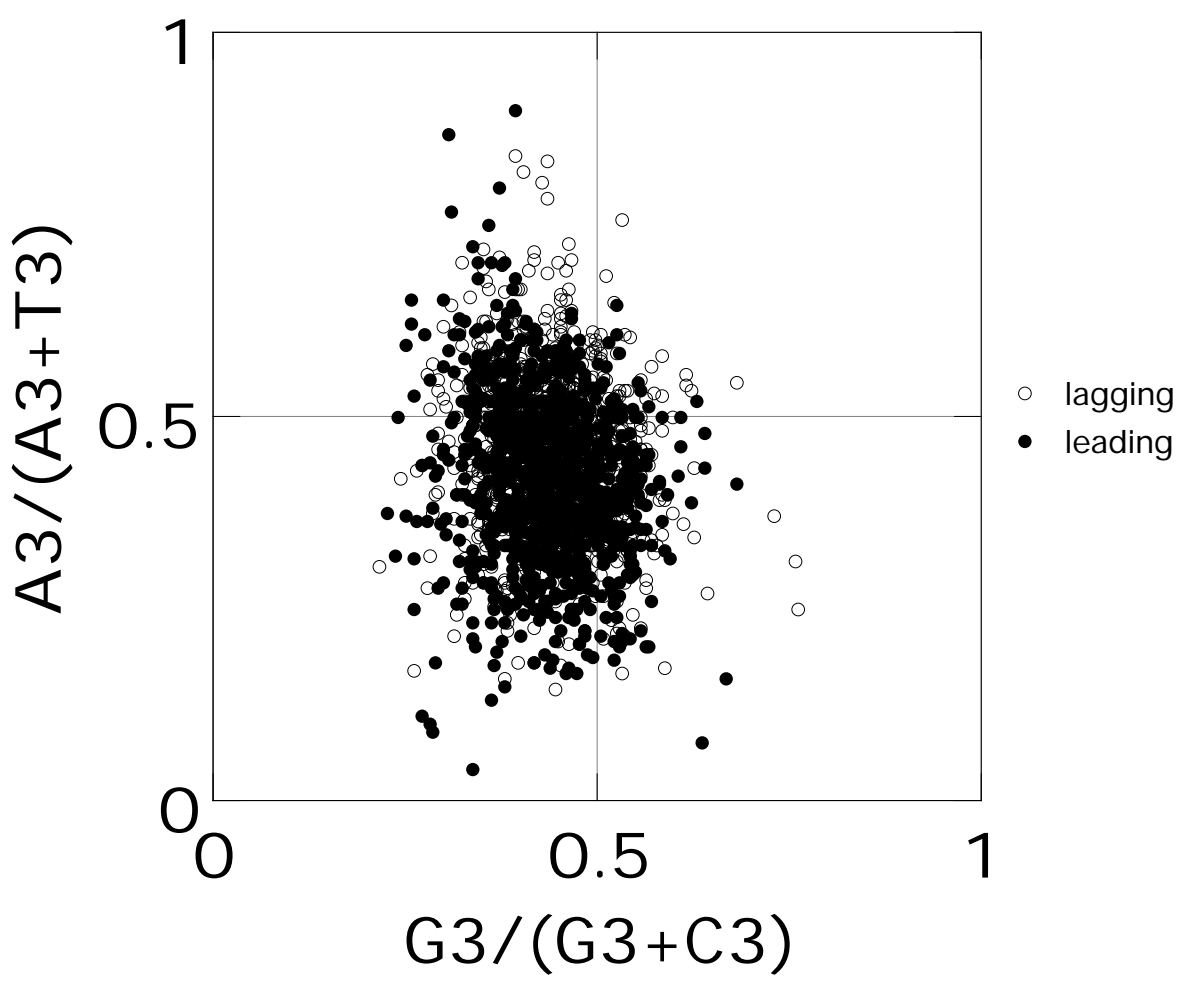

*Deinococcus radiodurans* chromosome 1



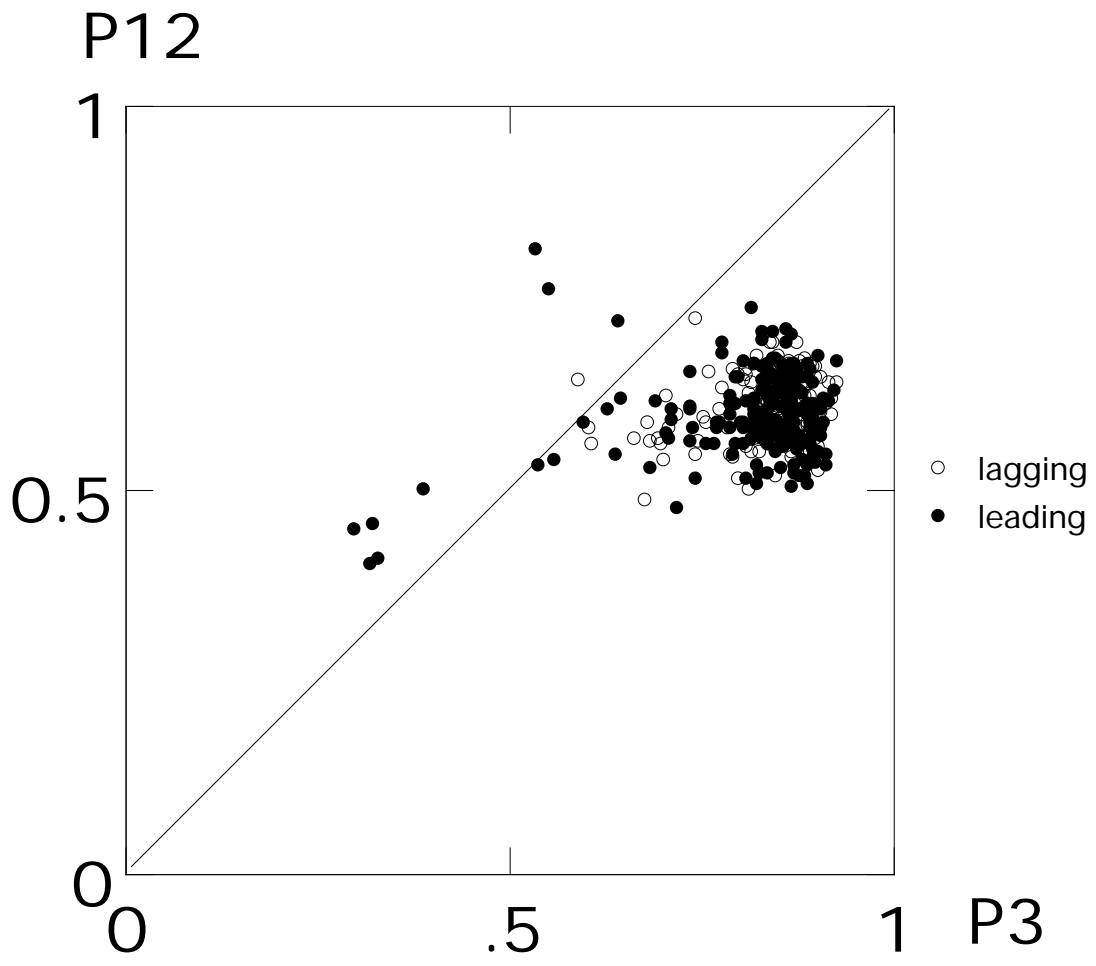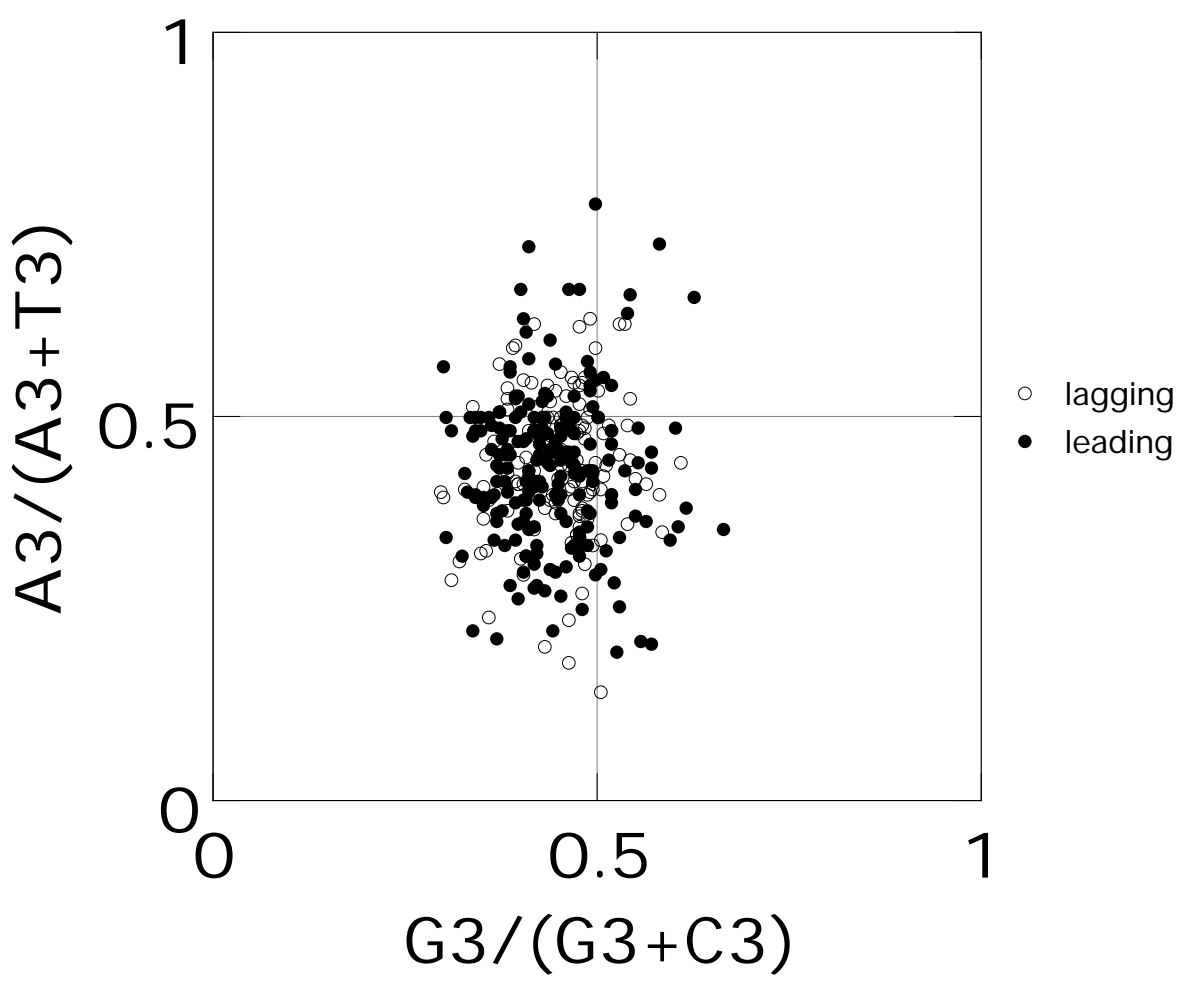

*Deinococcus radiodurans* chromosome 2

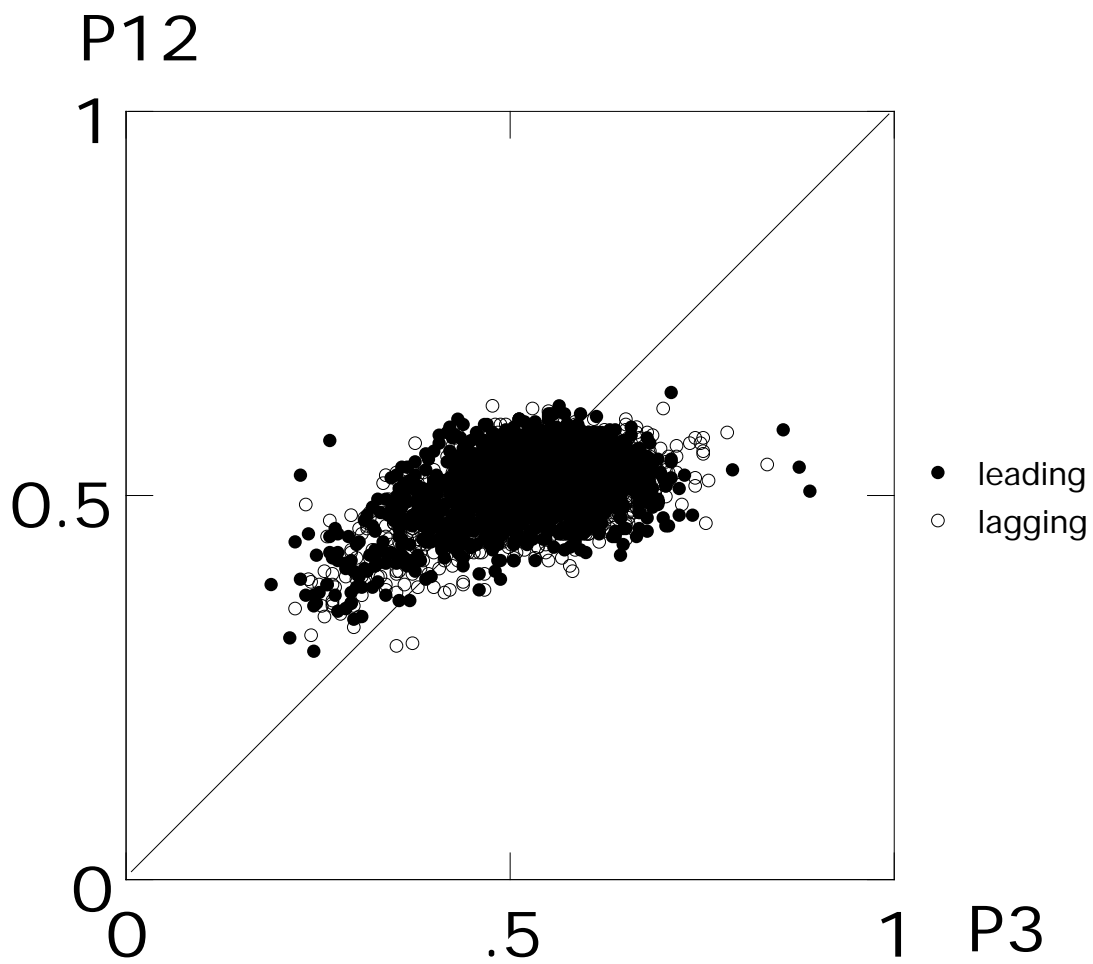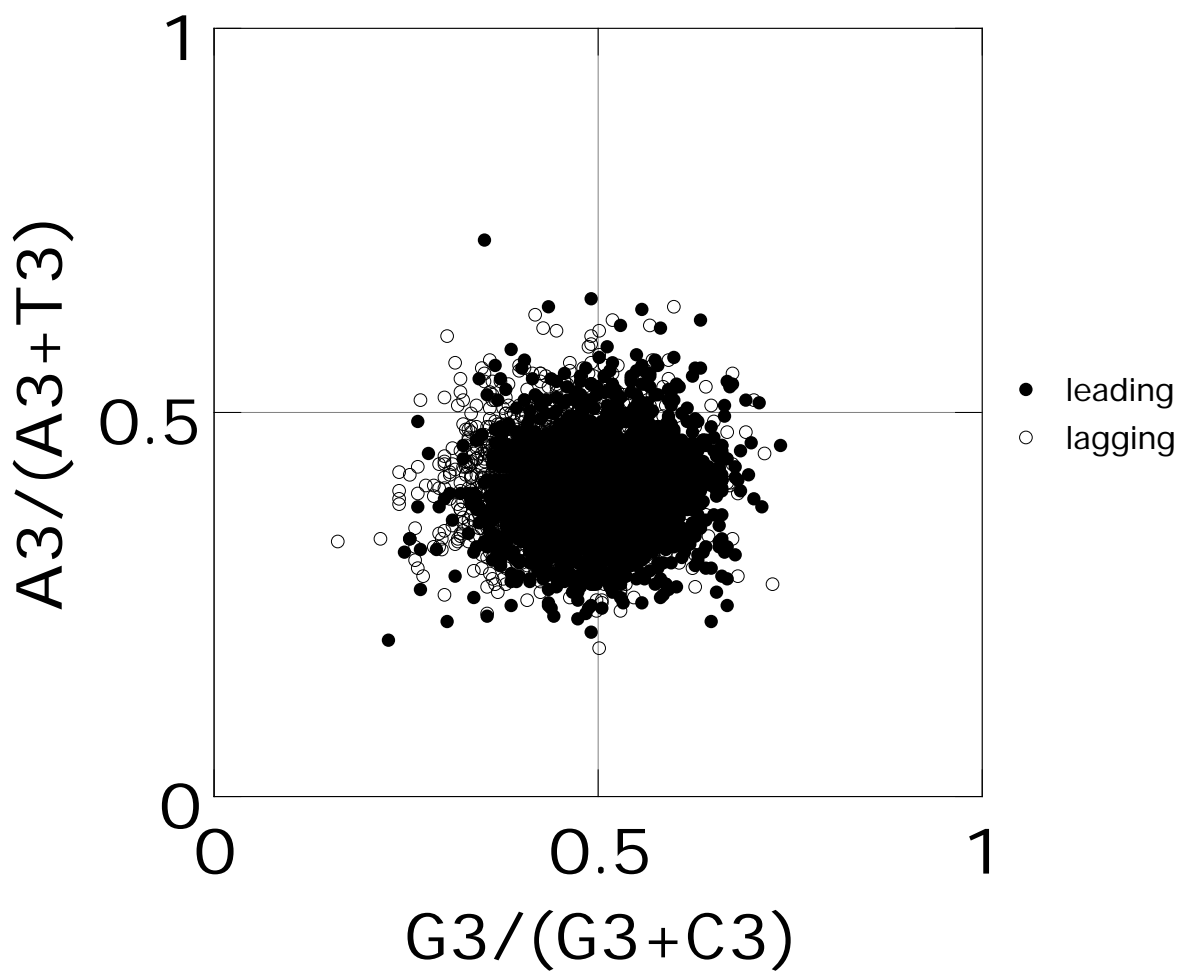

*Escherichia coli* K-12

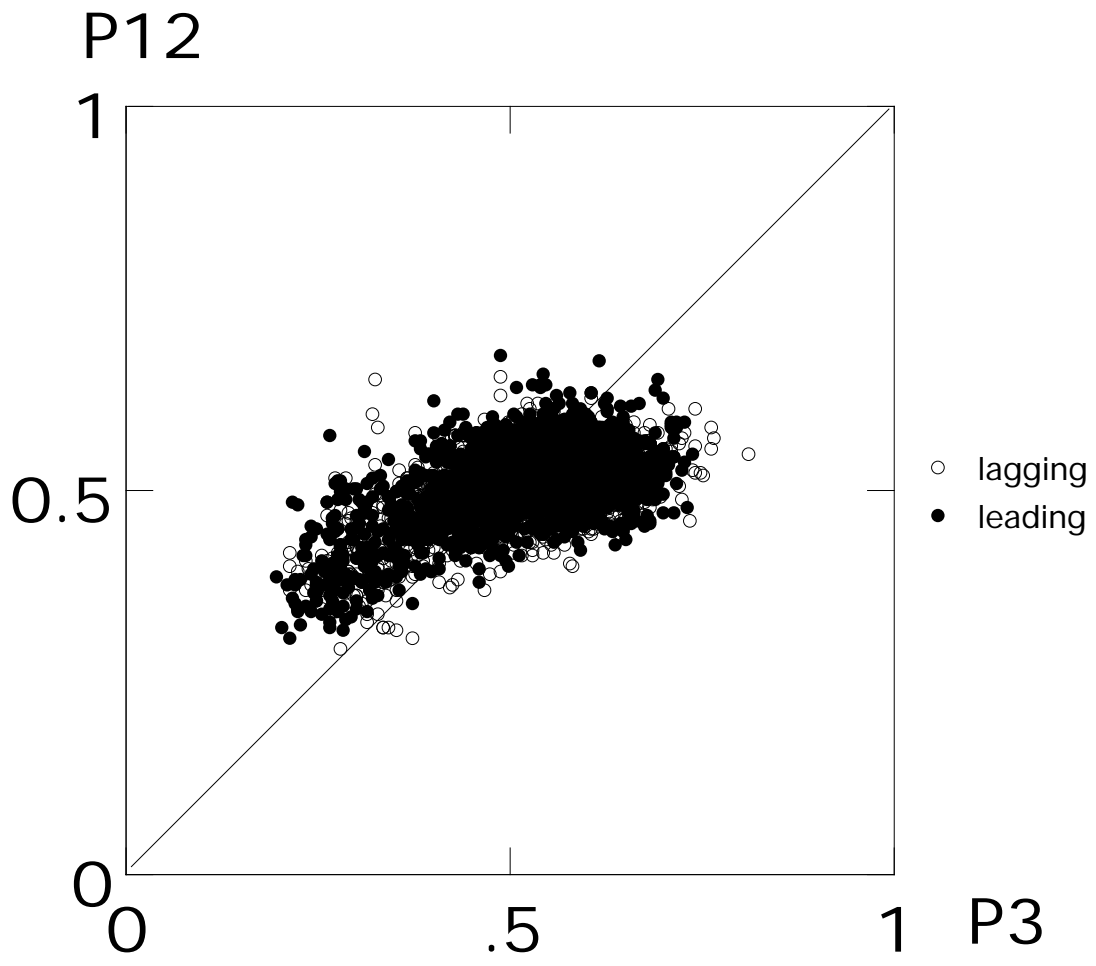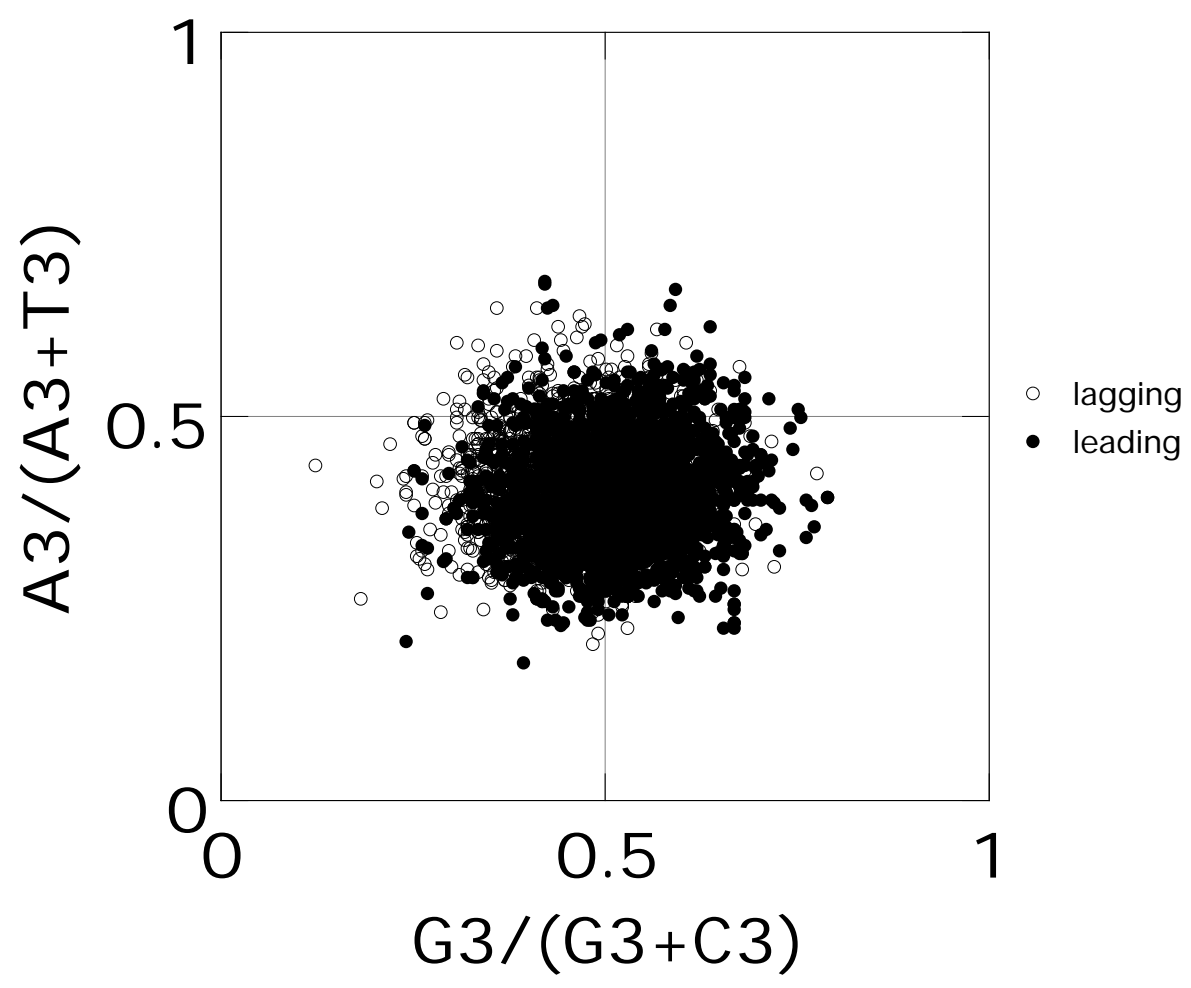

*Escherichia coli* EDL933

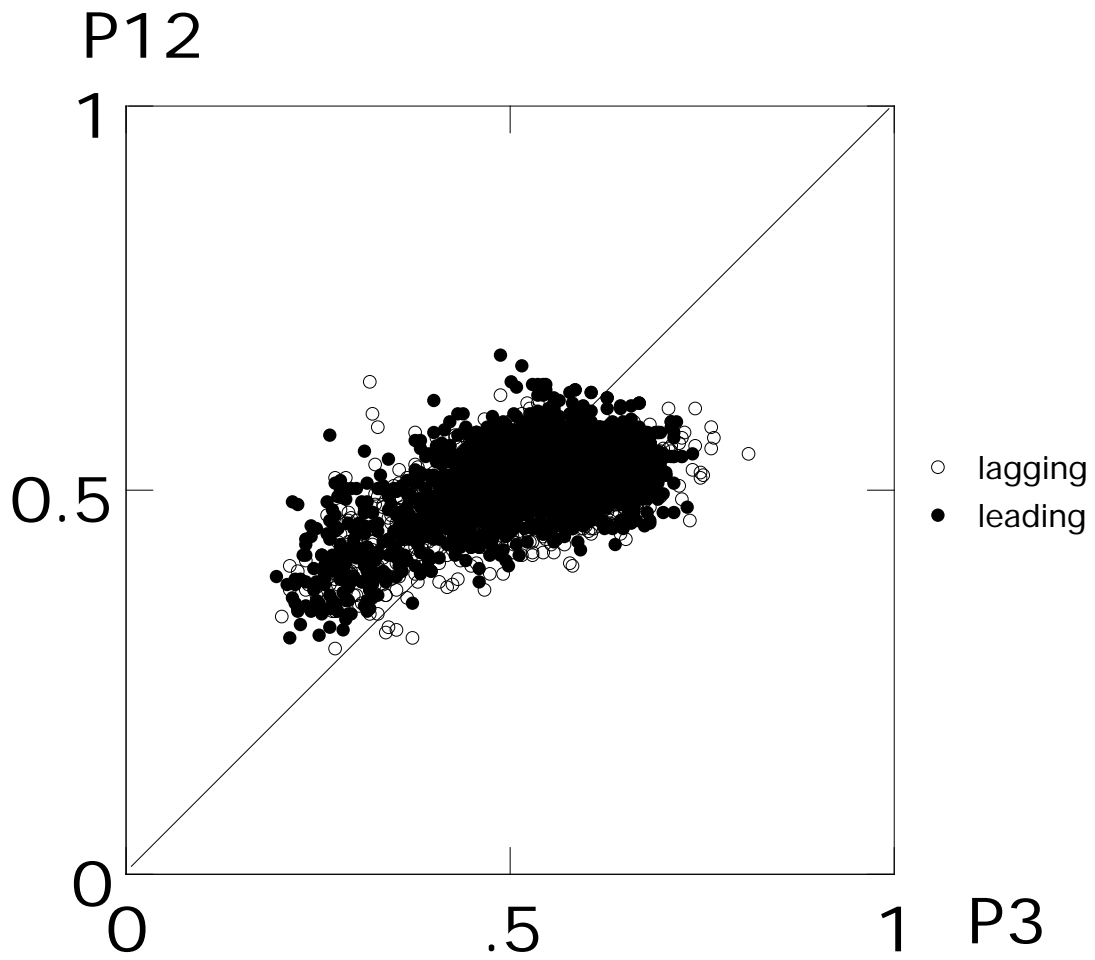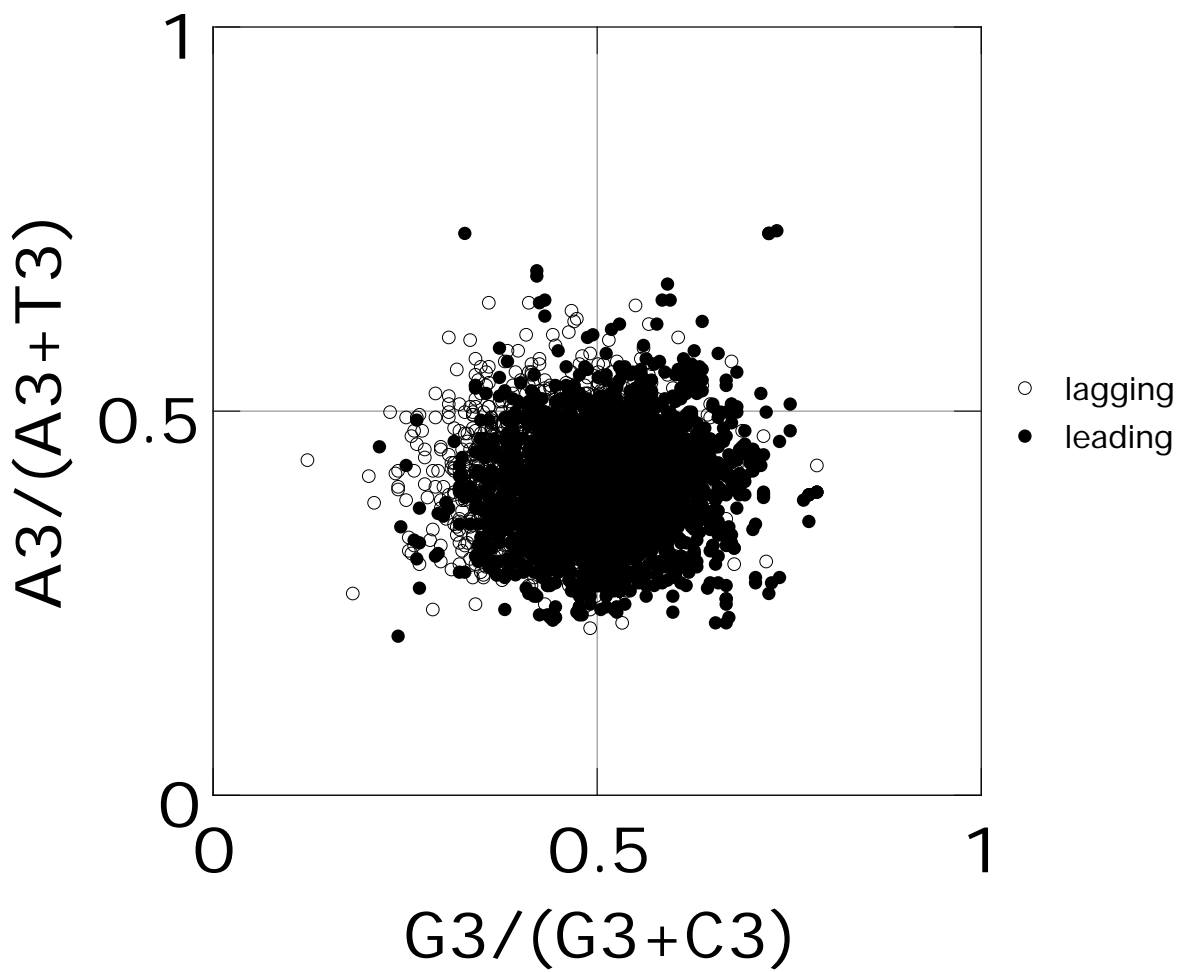

*Escherichia coli* RIMD 0509952

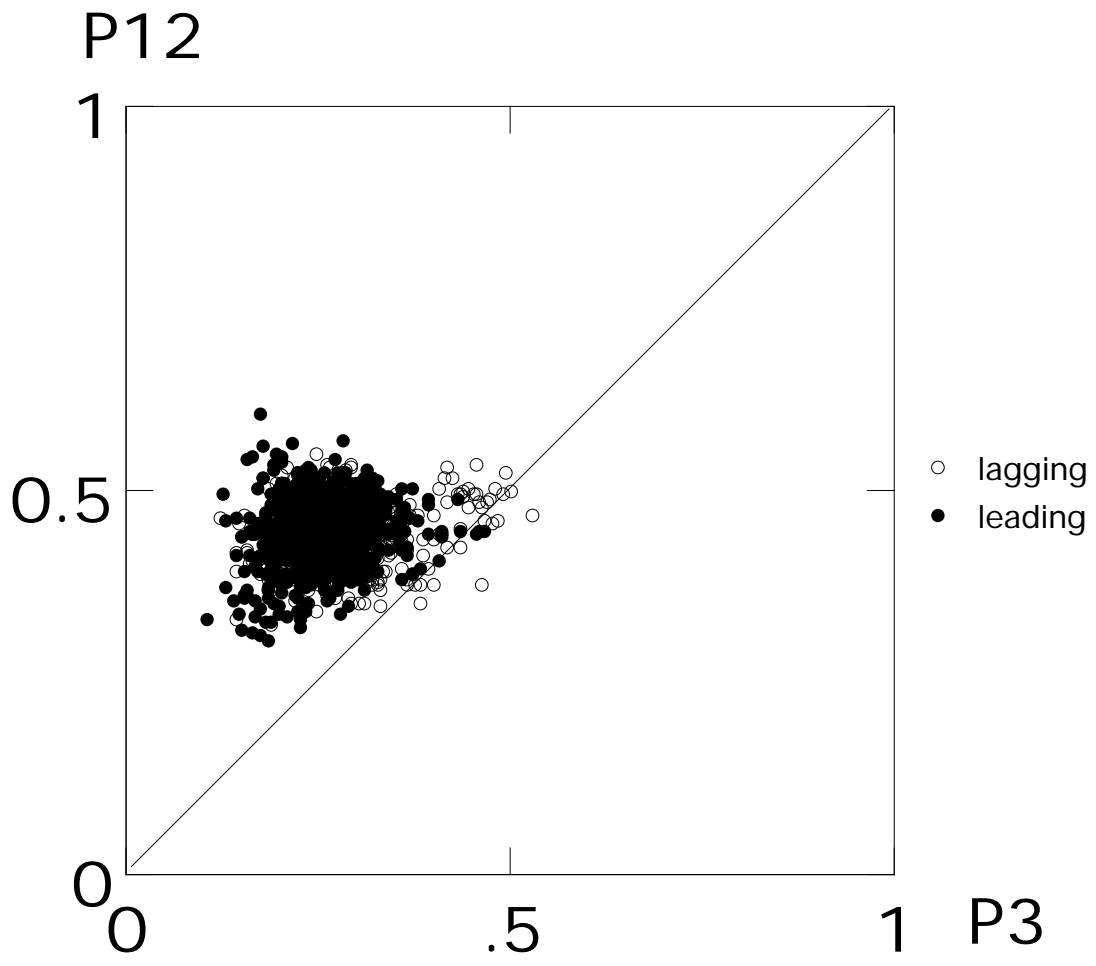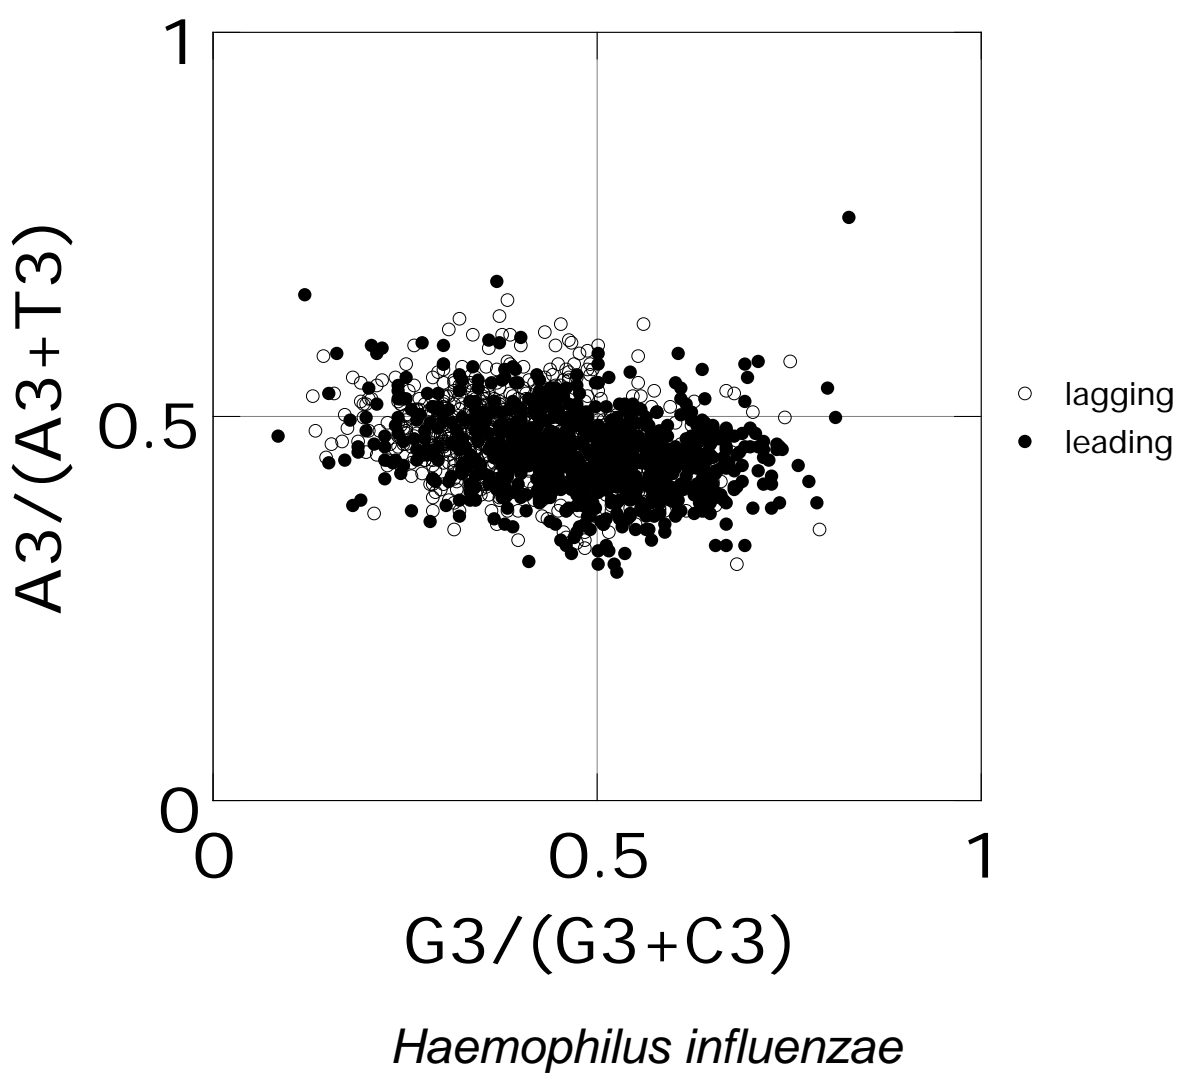

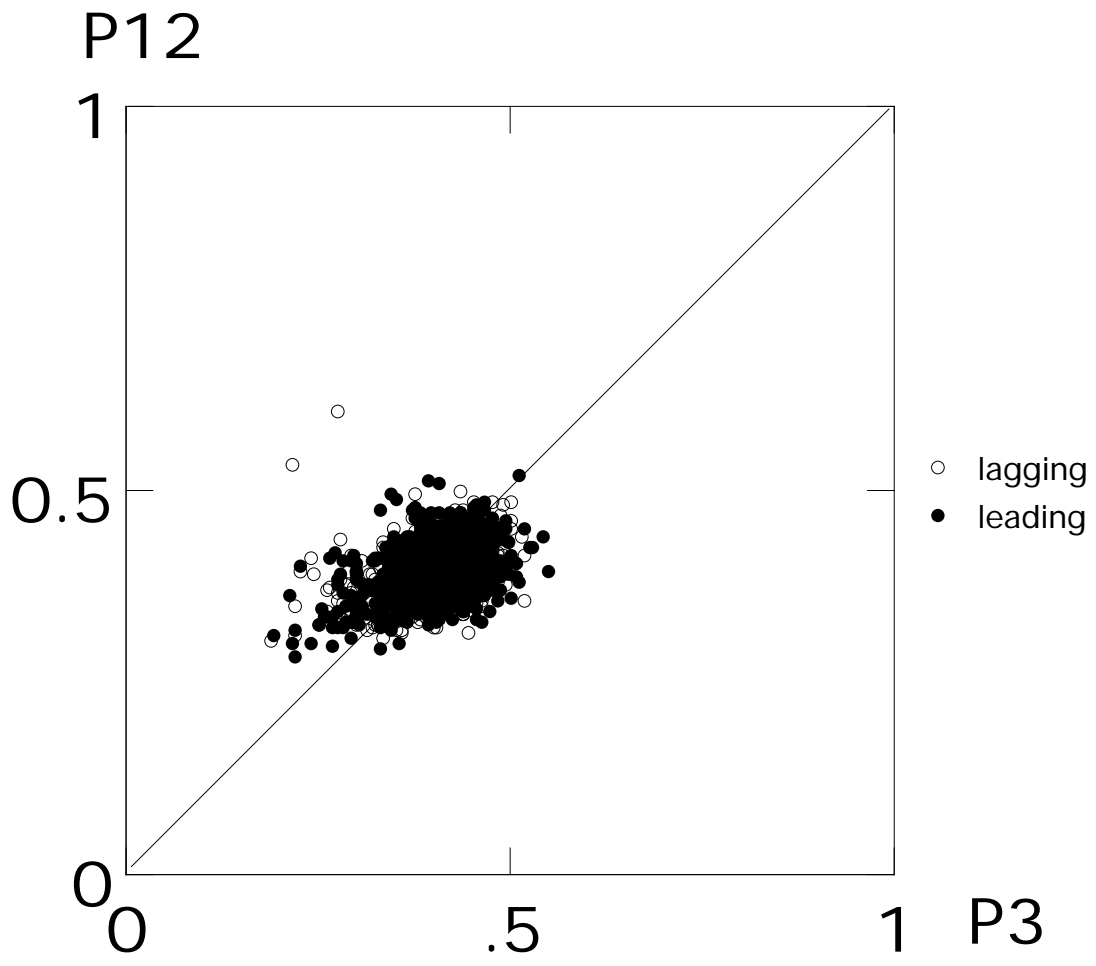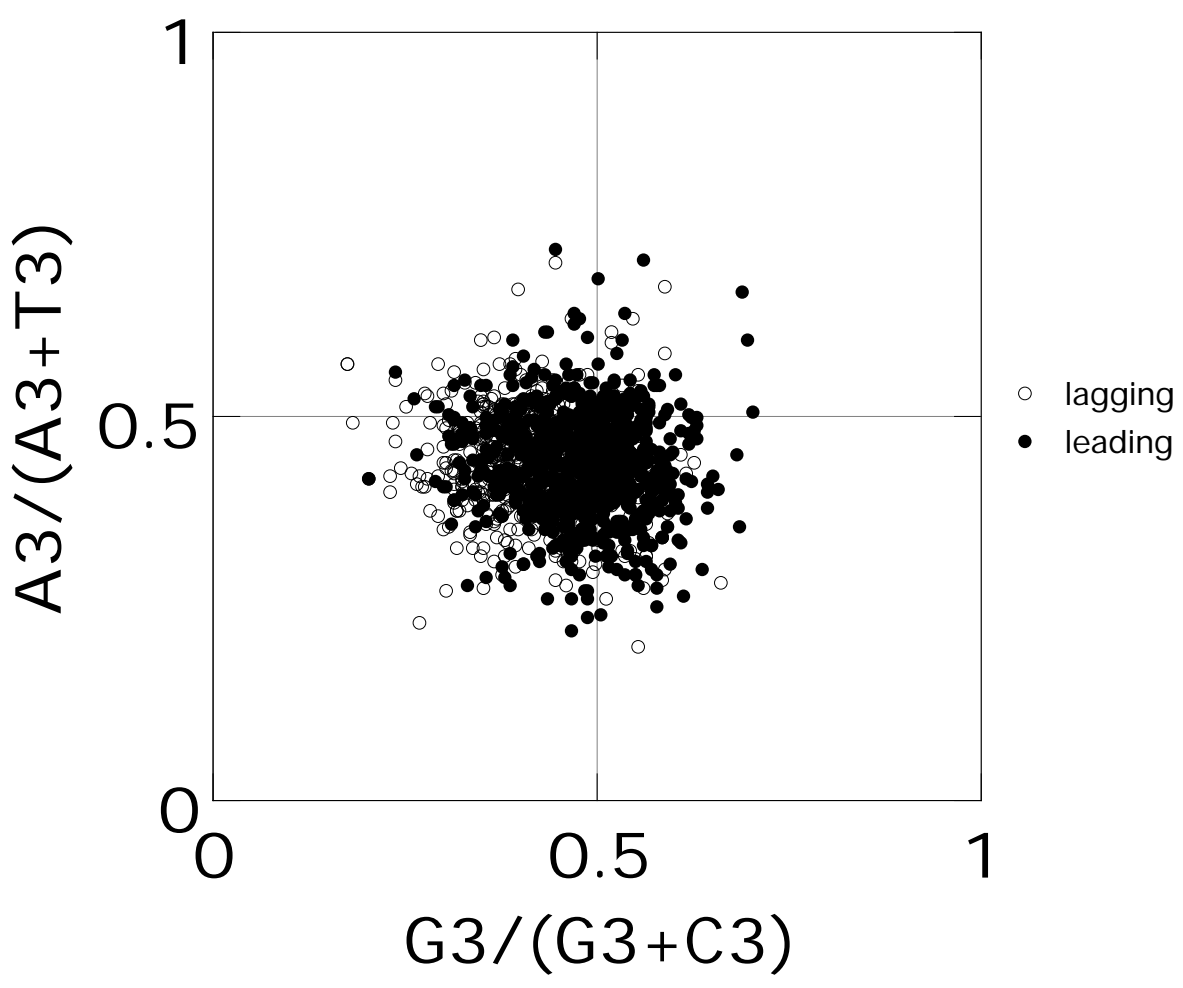

*Helicobacter pylori* 26695

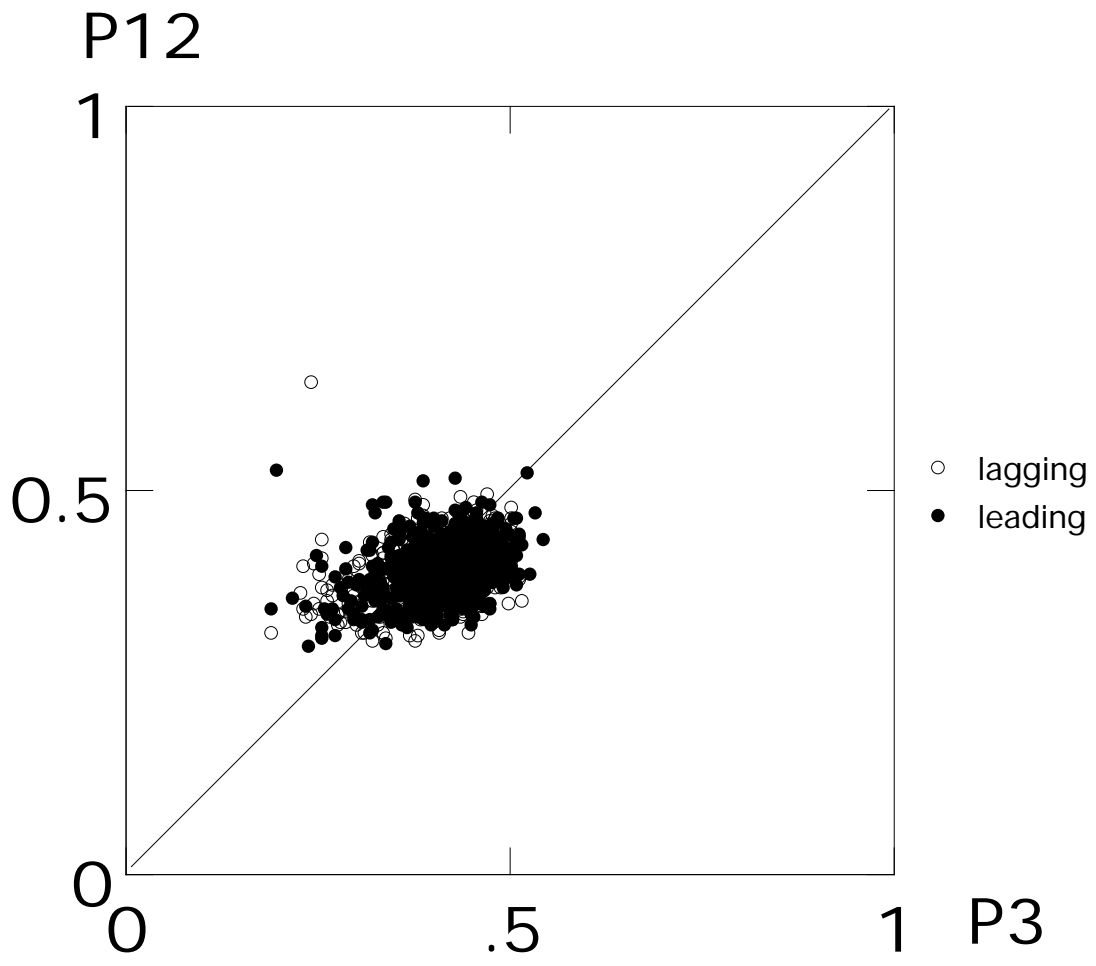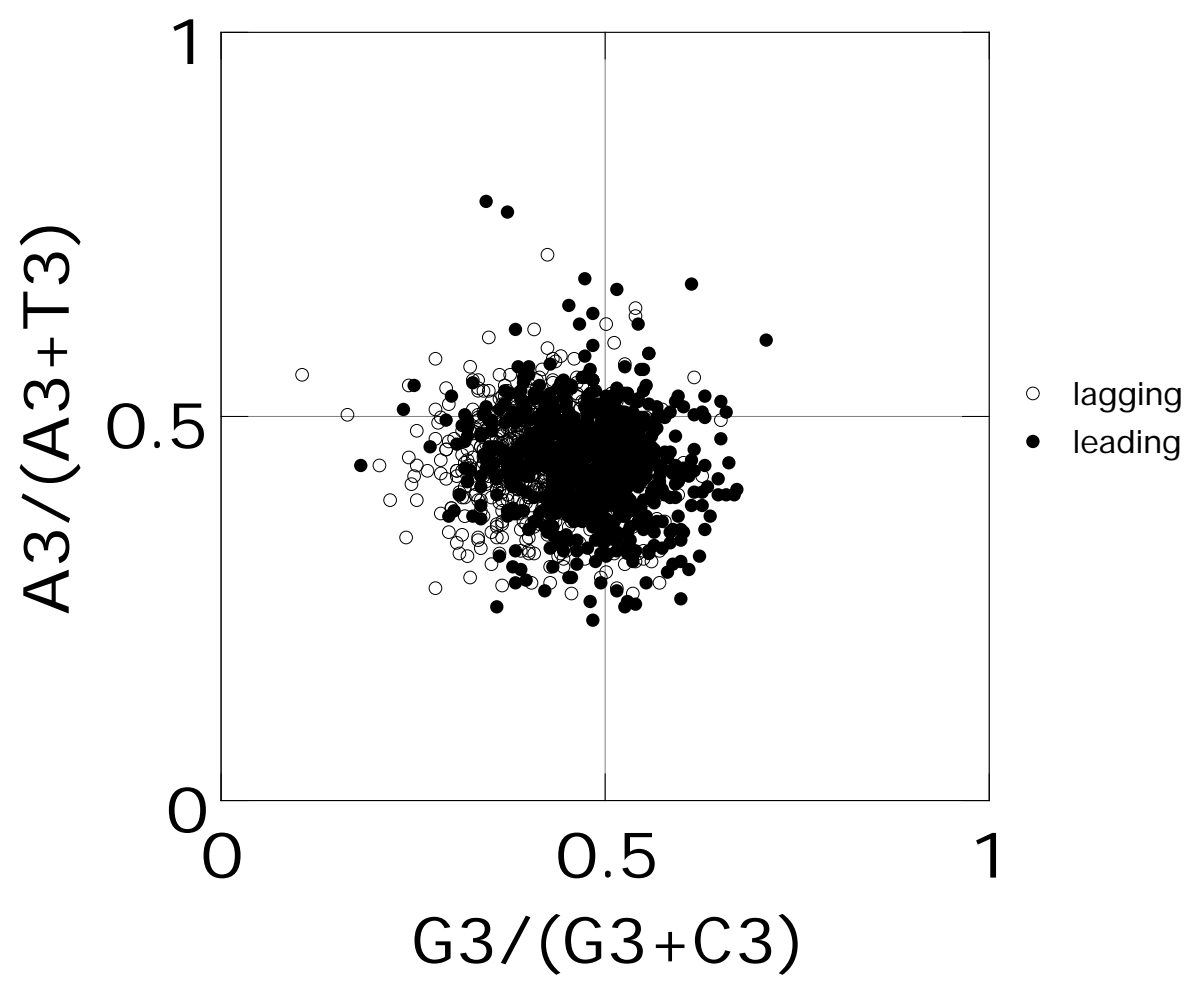

*Helicobacter pylori* J99

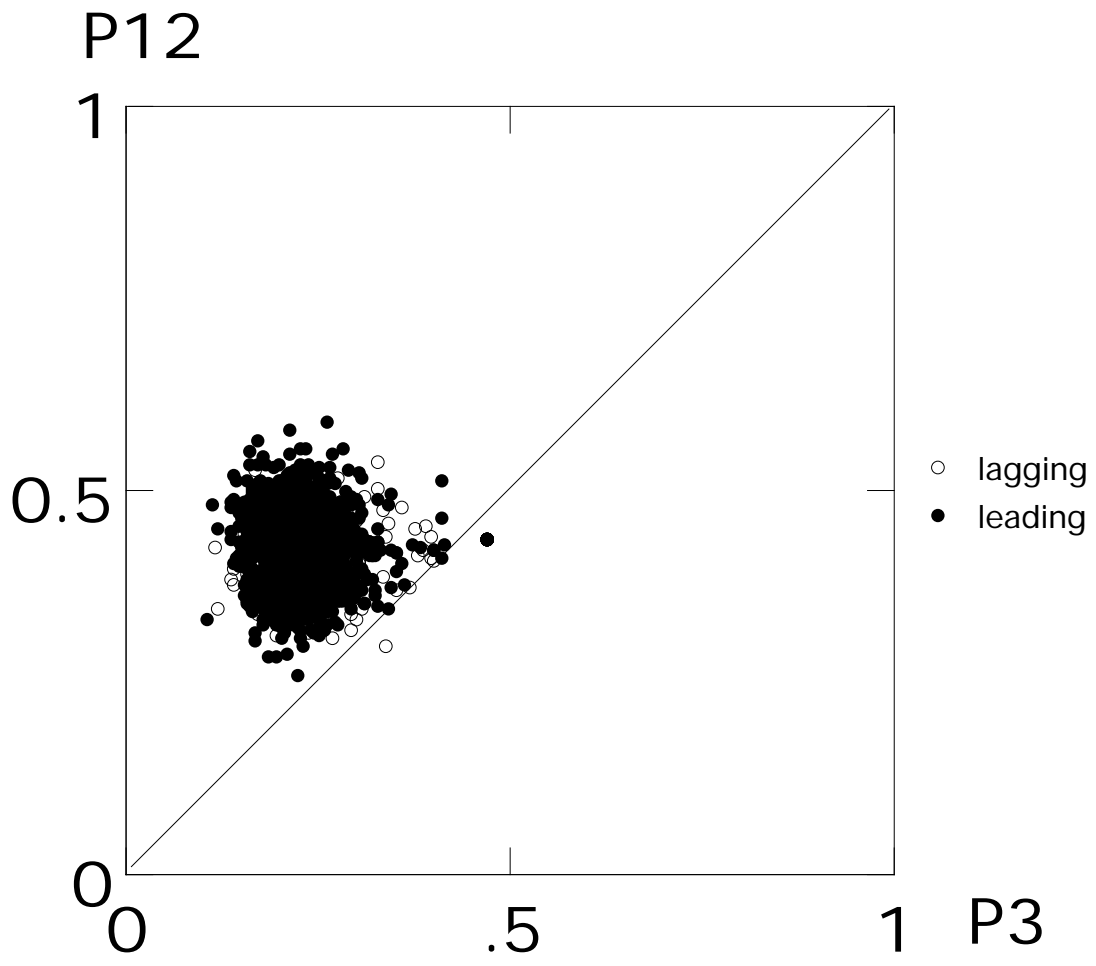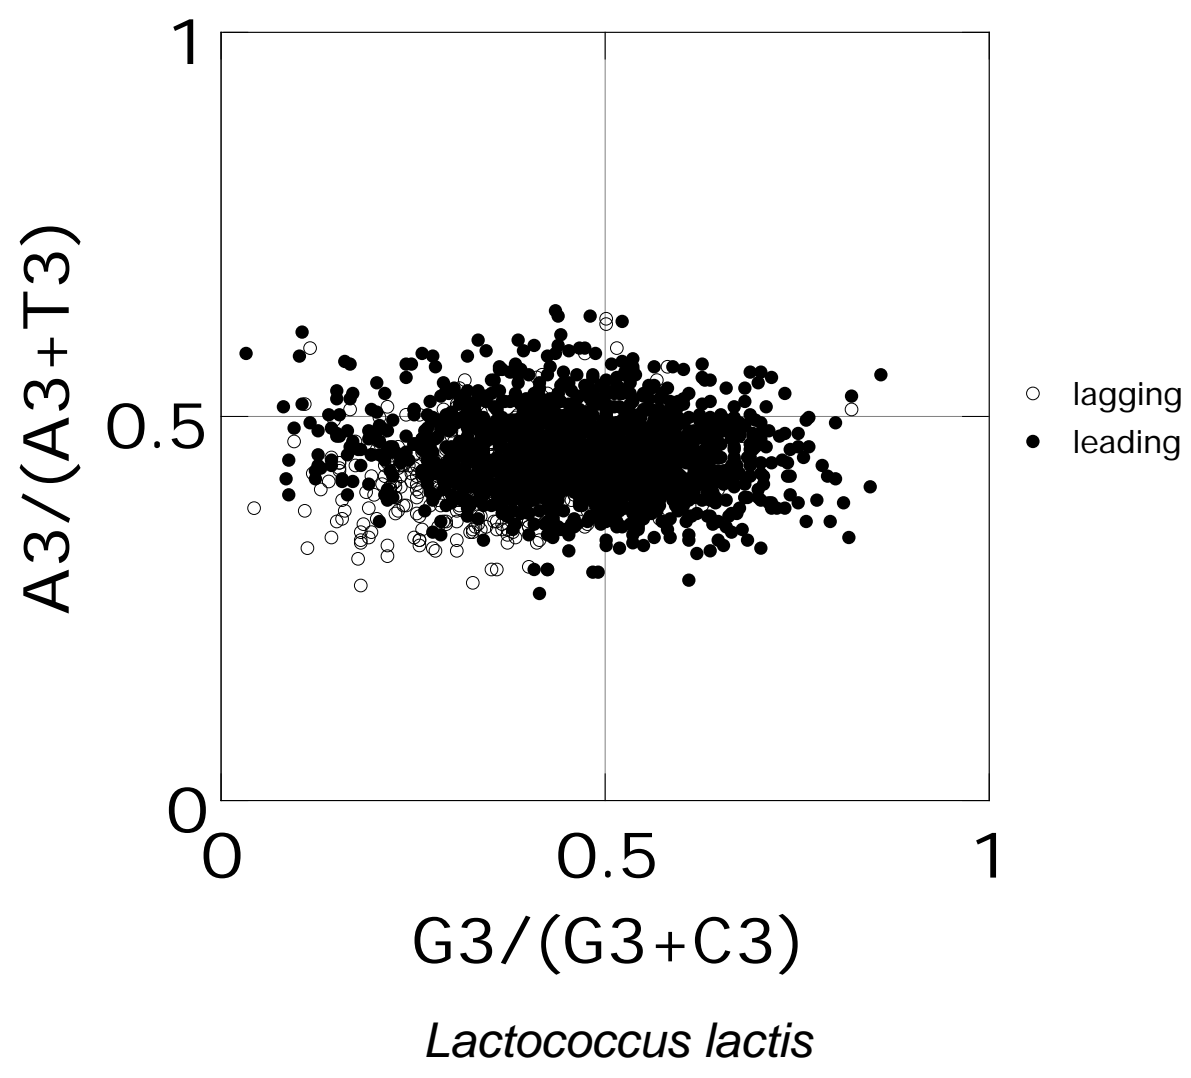



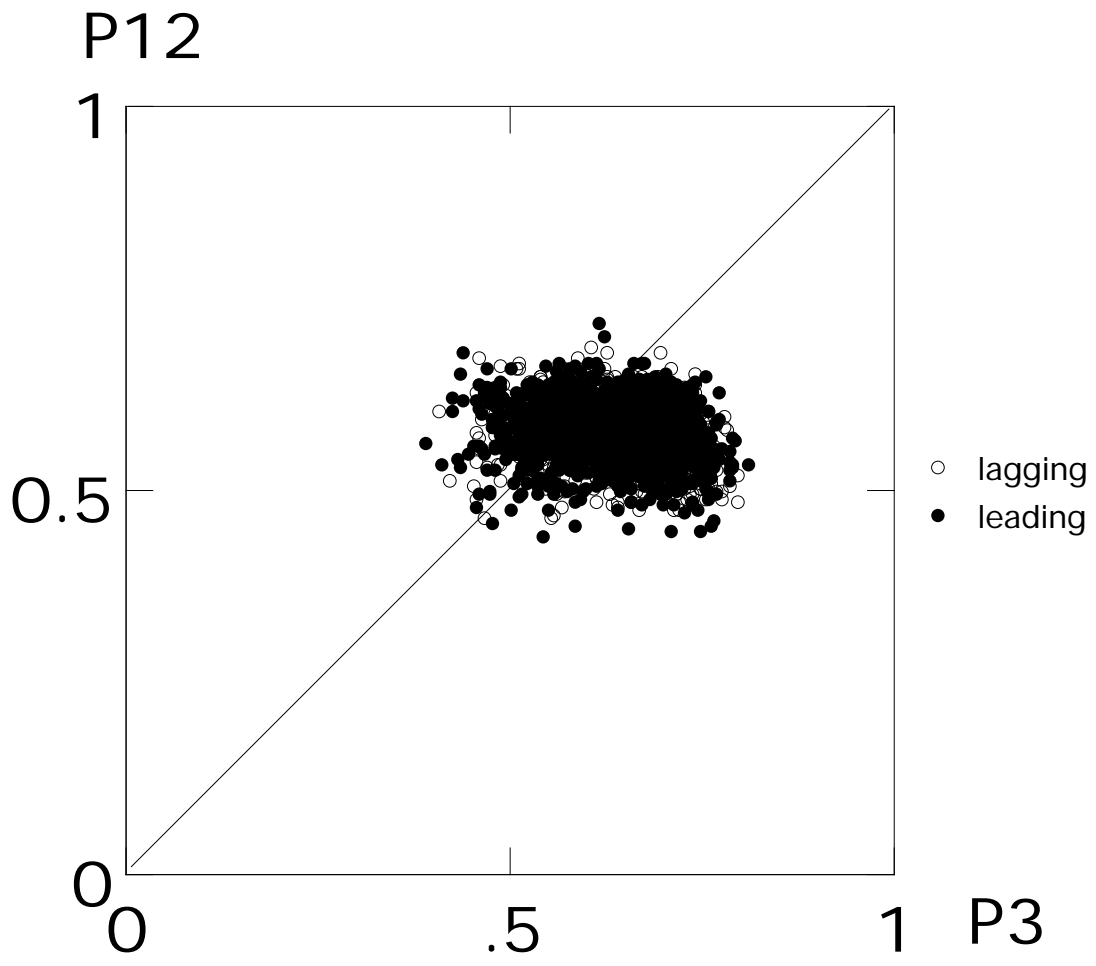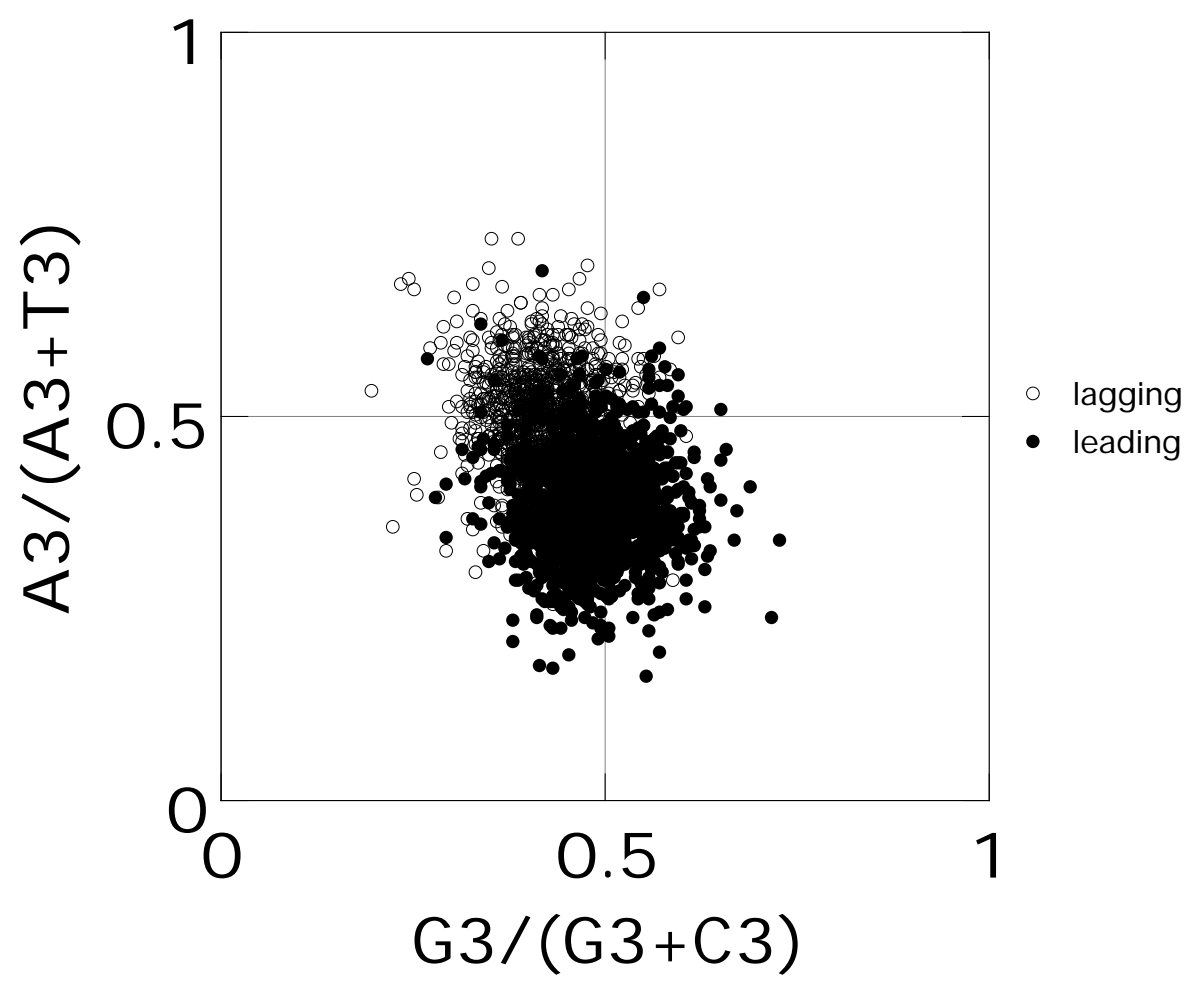

*Mycobacterium leprae*

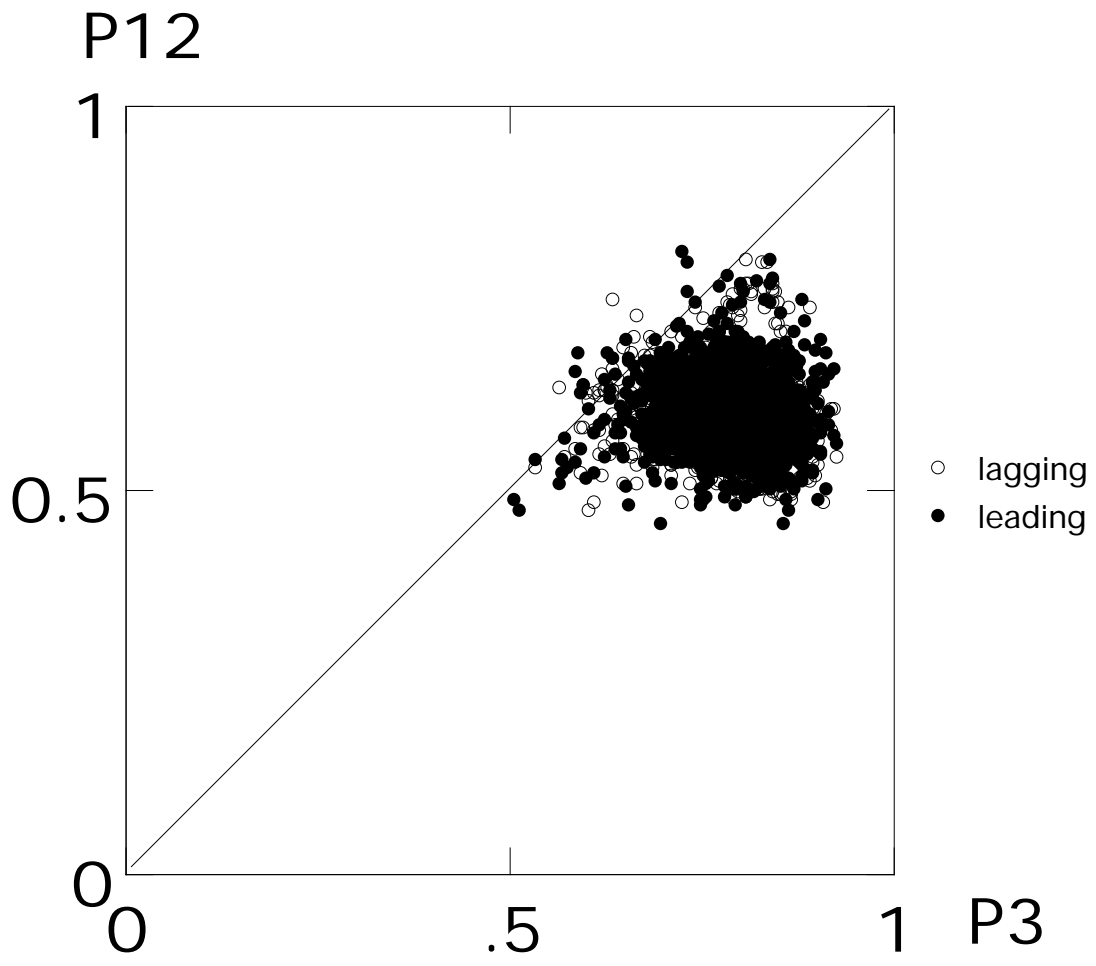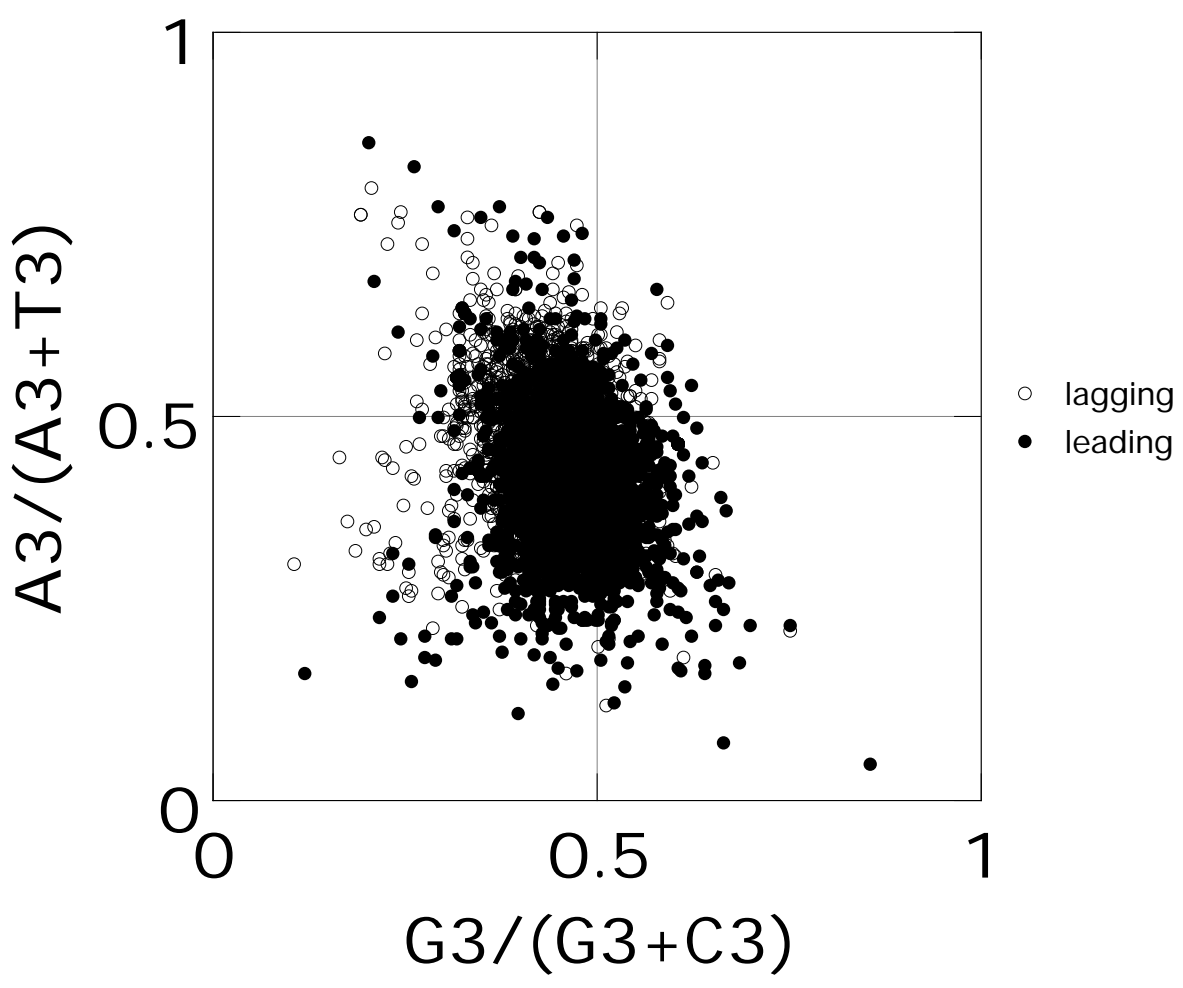

*Mycobacterium tuberculosis* H37Rv

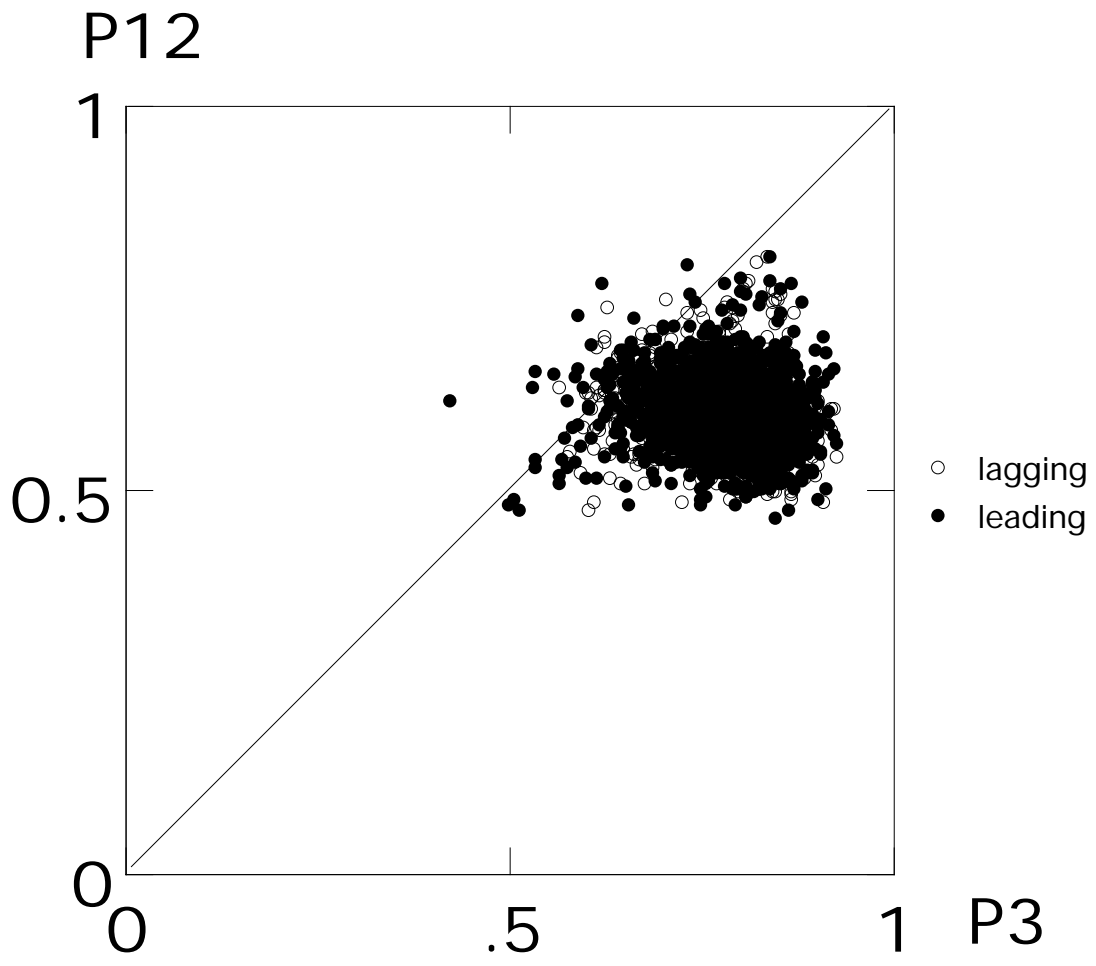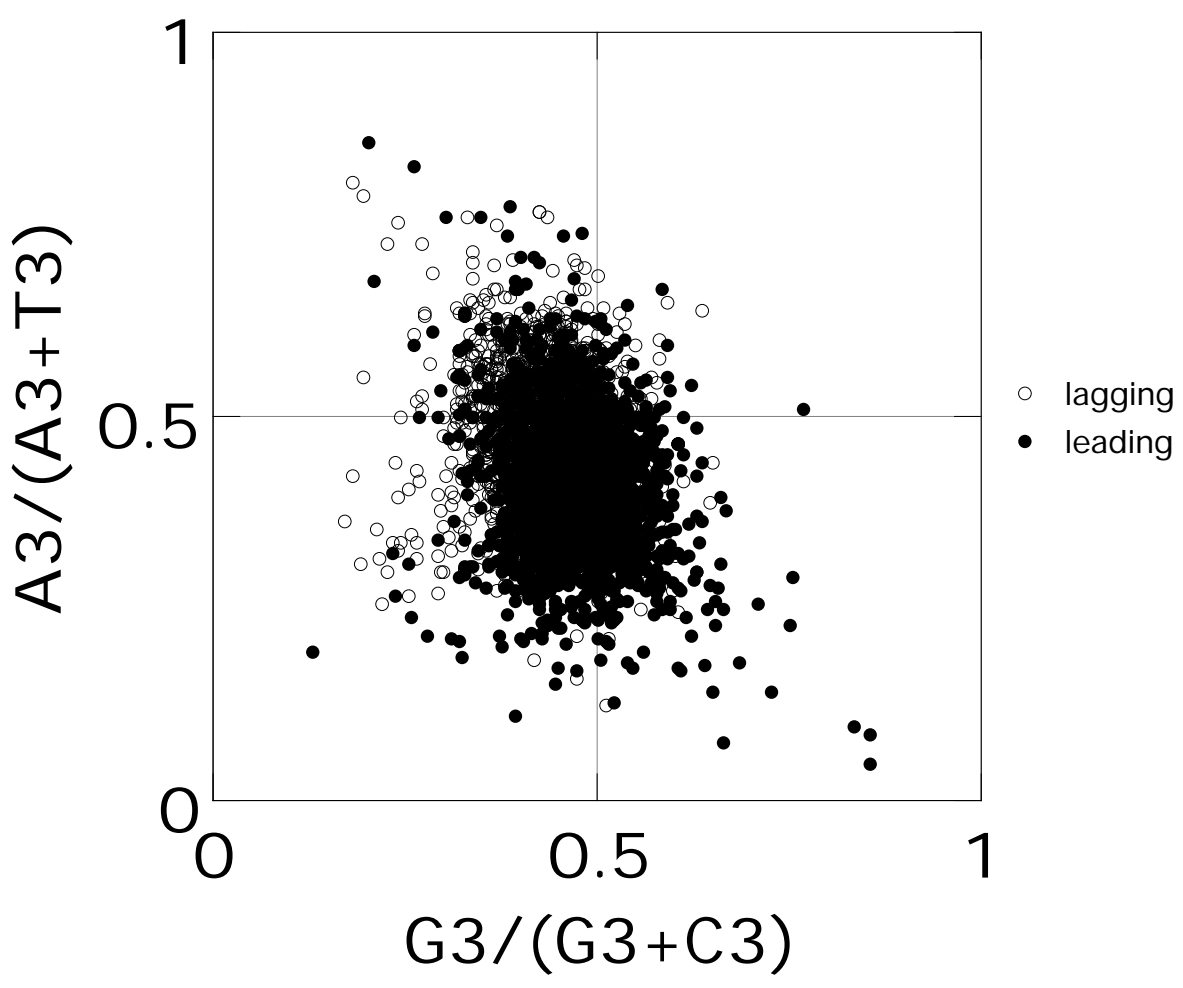

*Mycobacterium tuberculosis* CDC1551

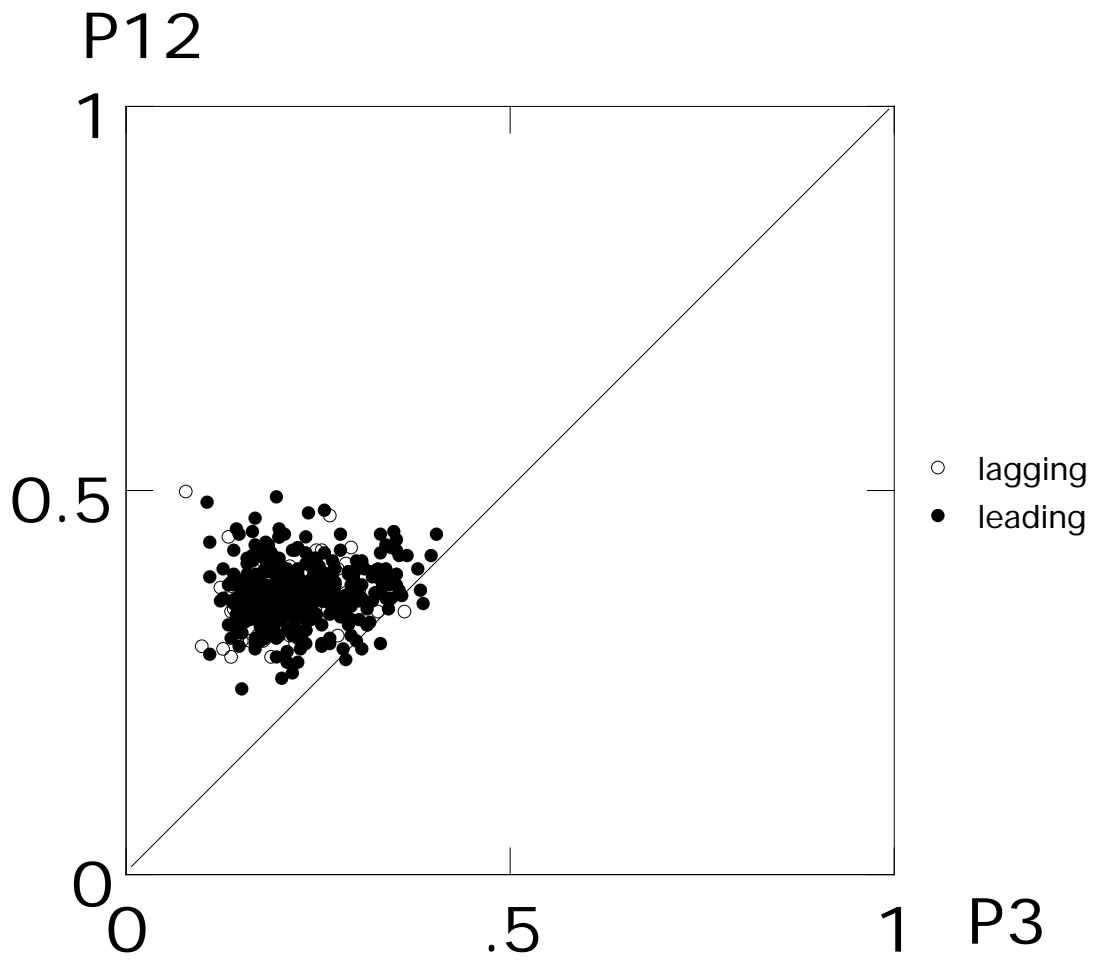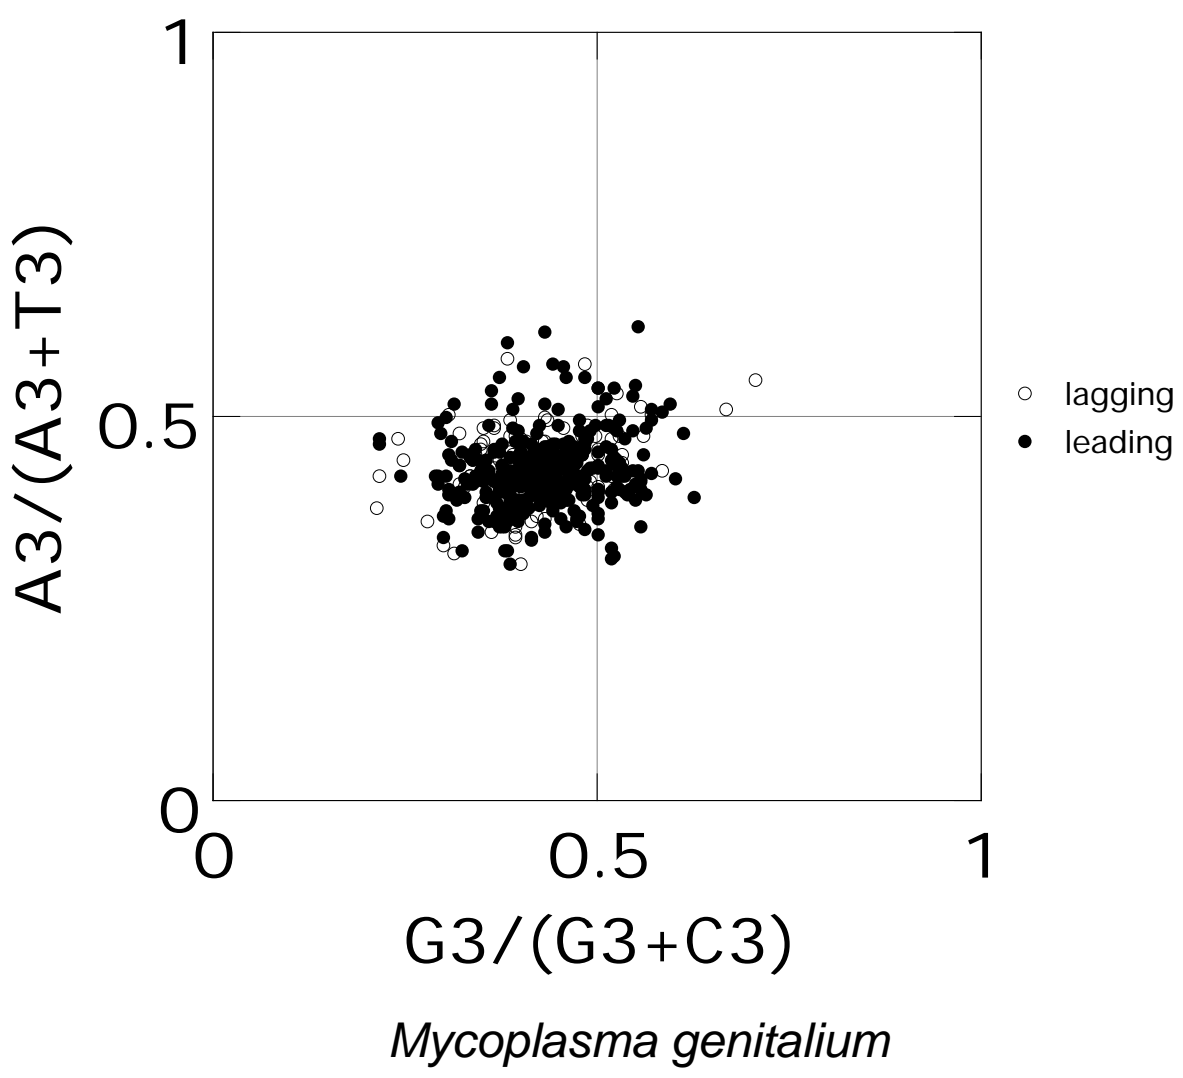

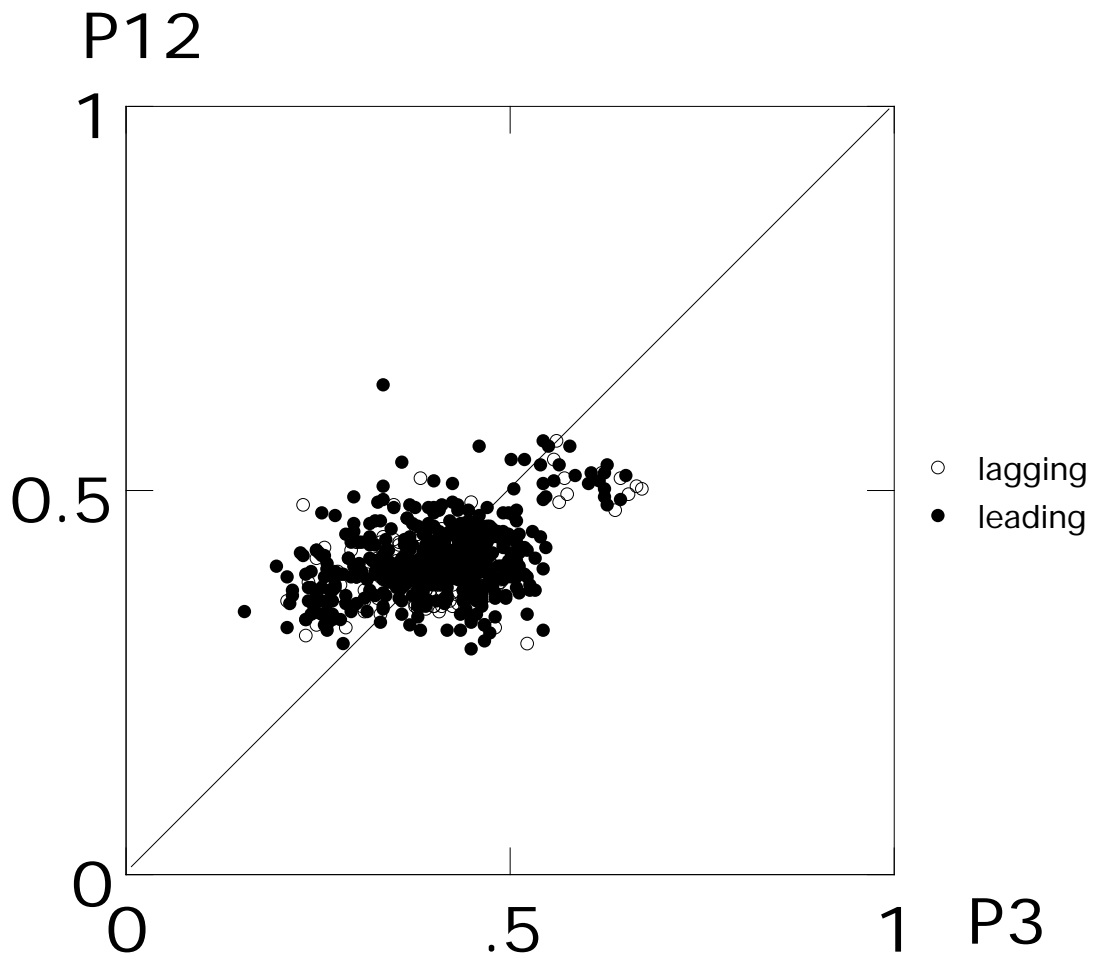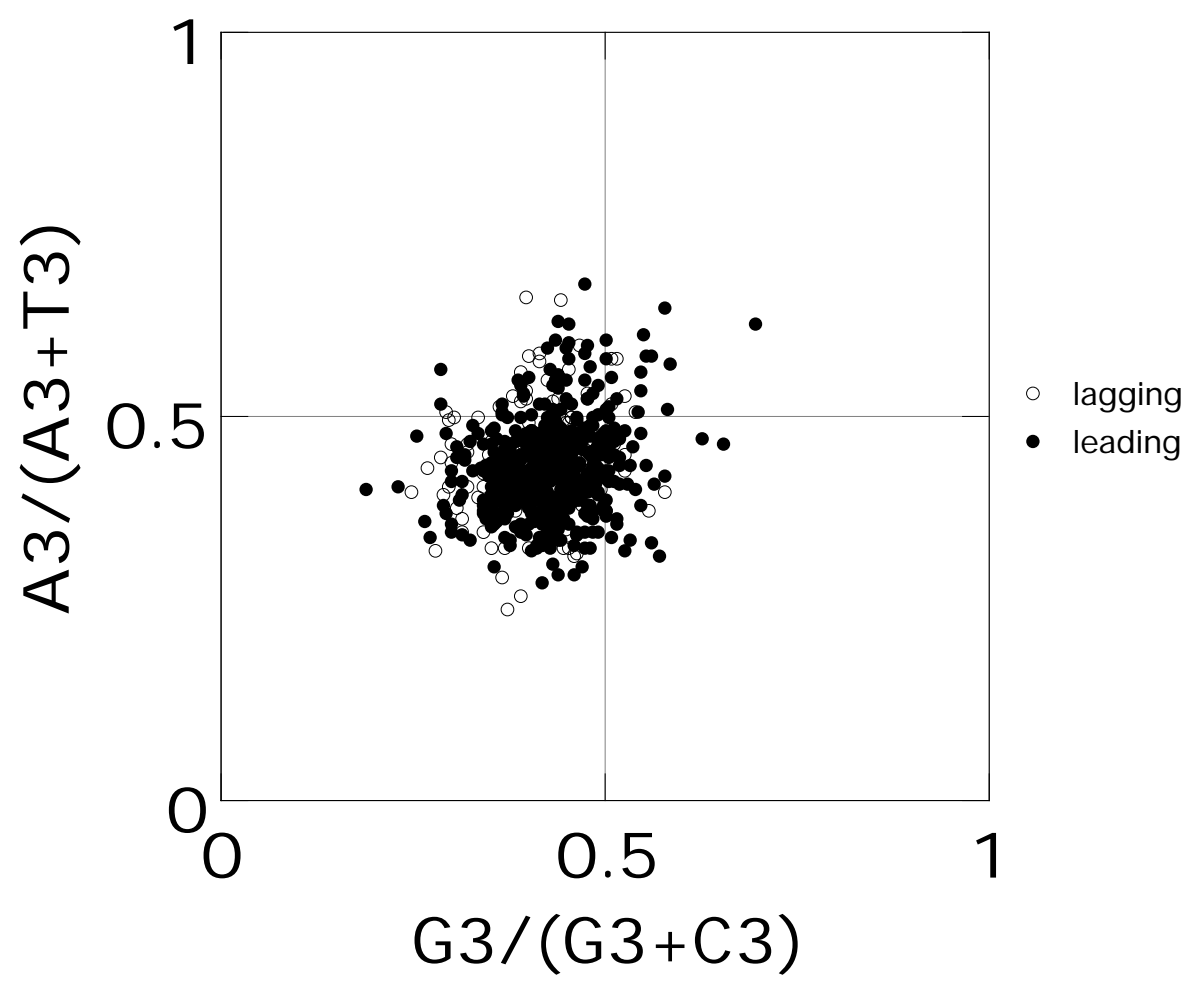

*Mycoplasma pneumoniae*

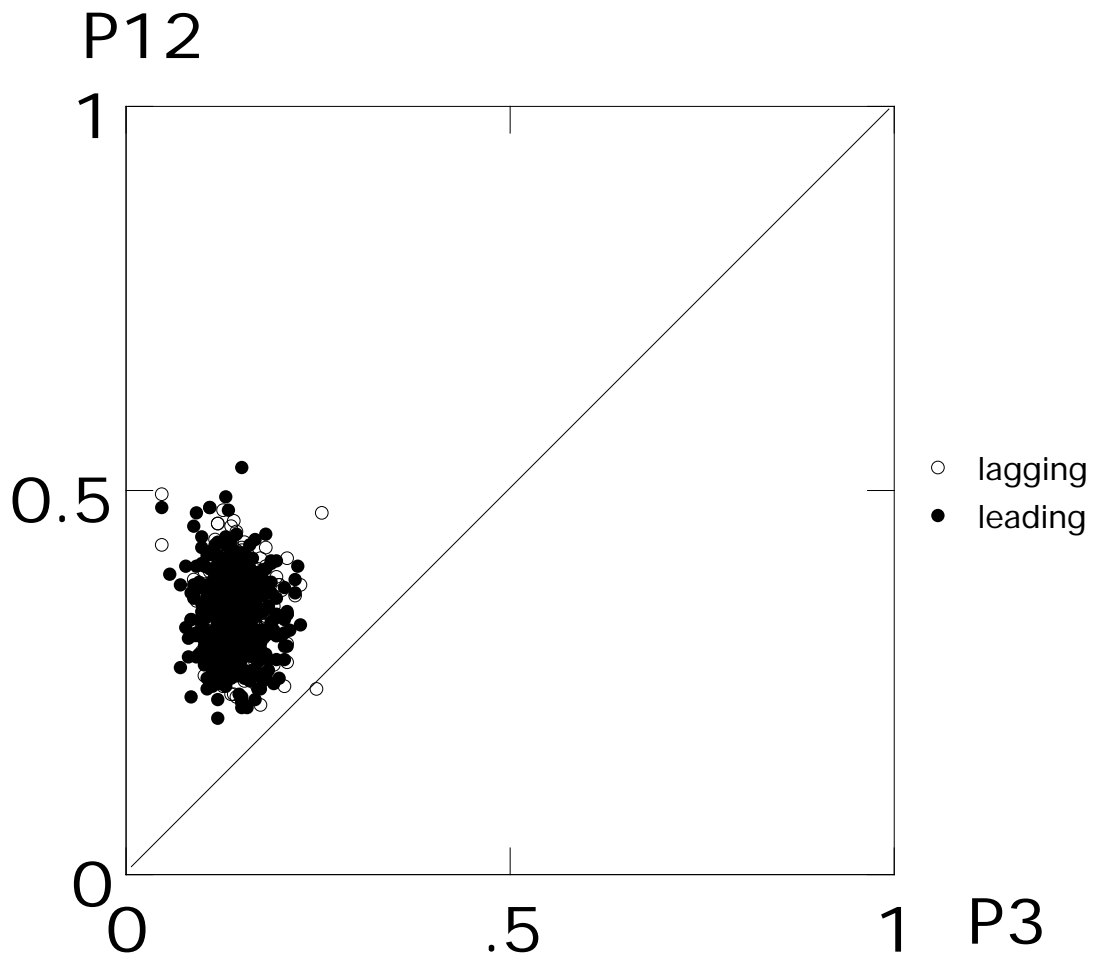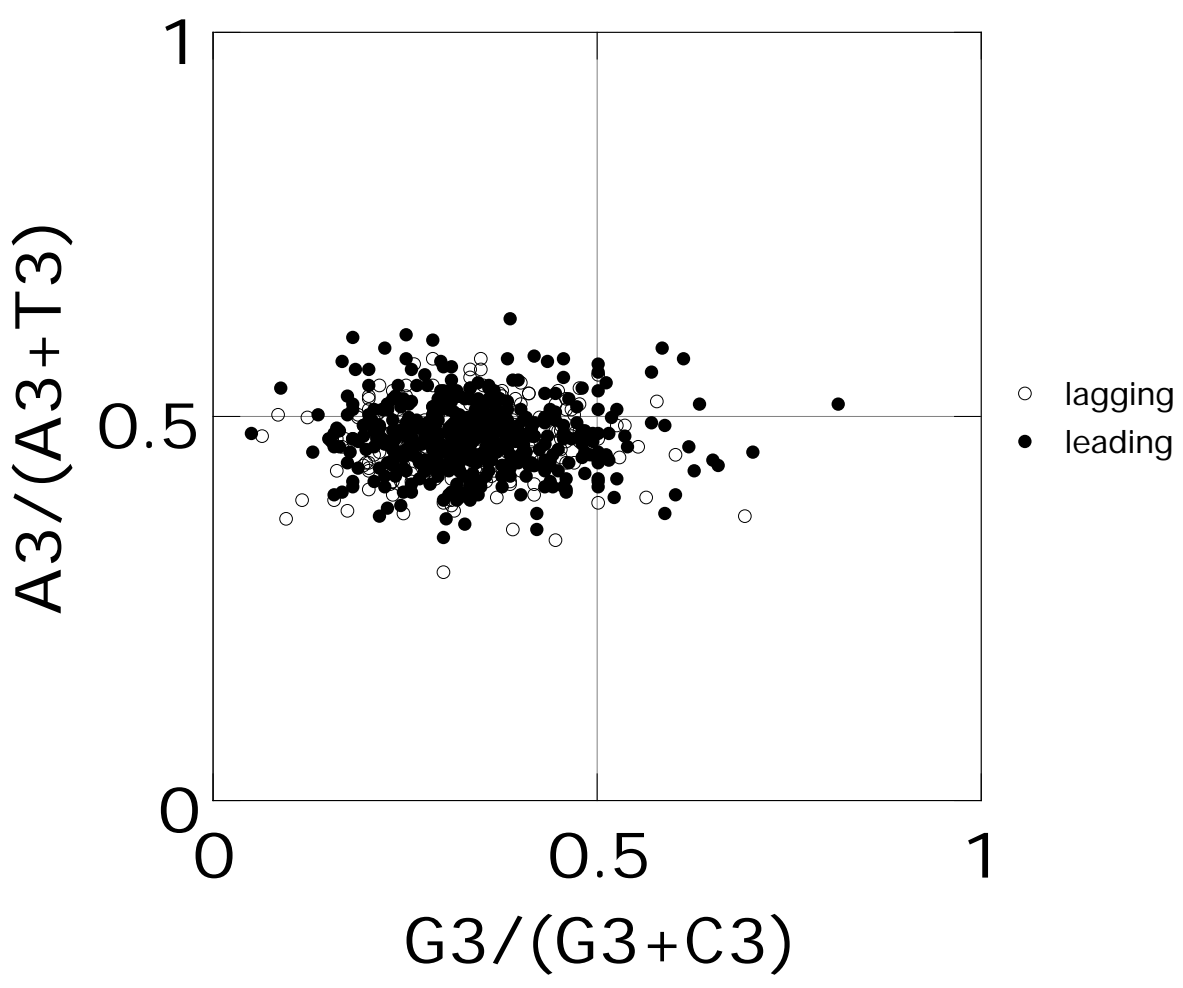

*Mycoplasma pulmonis*

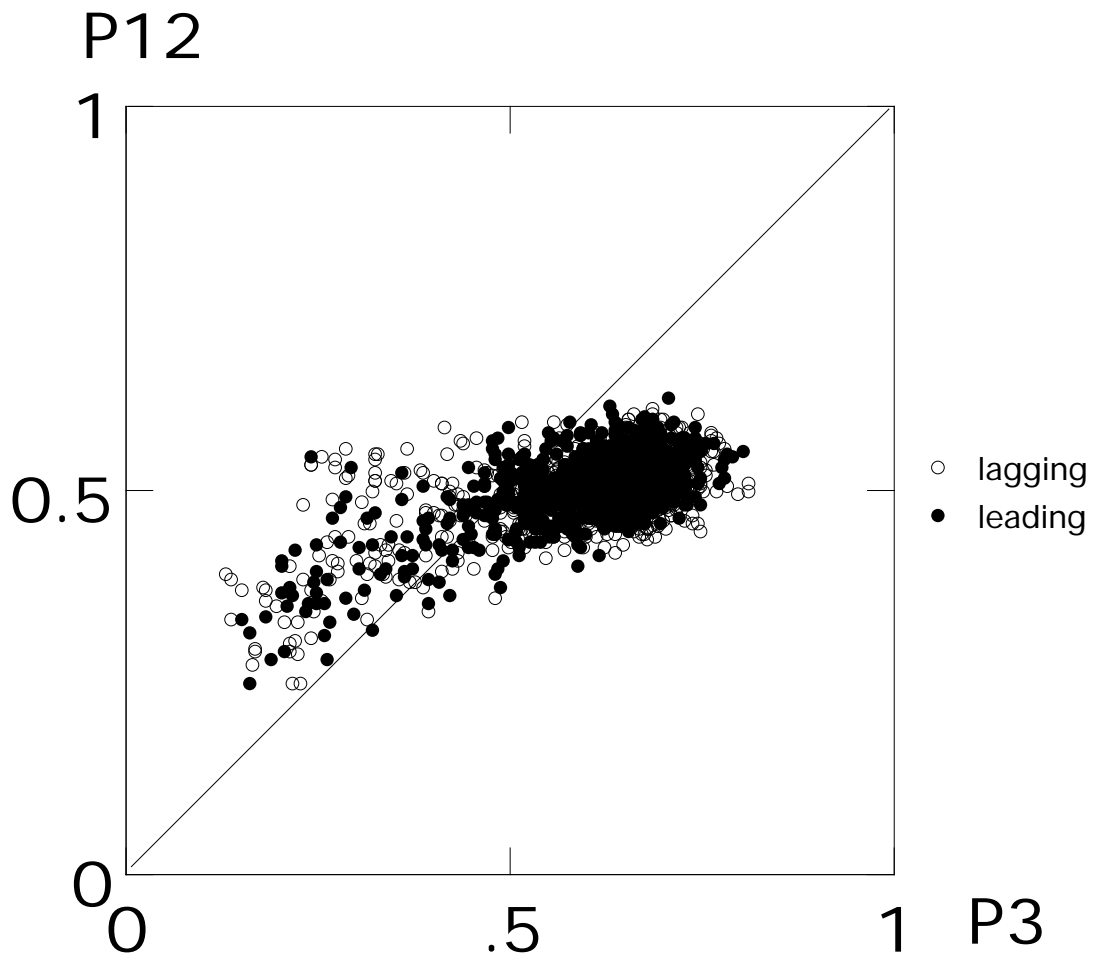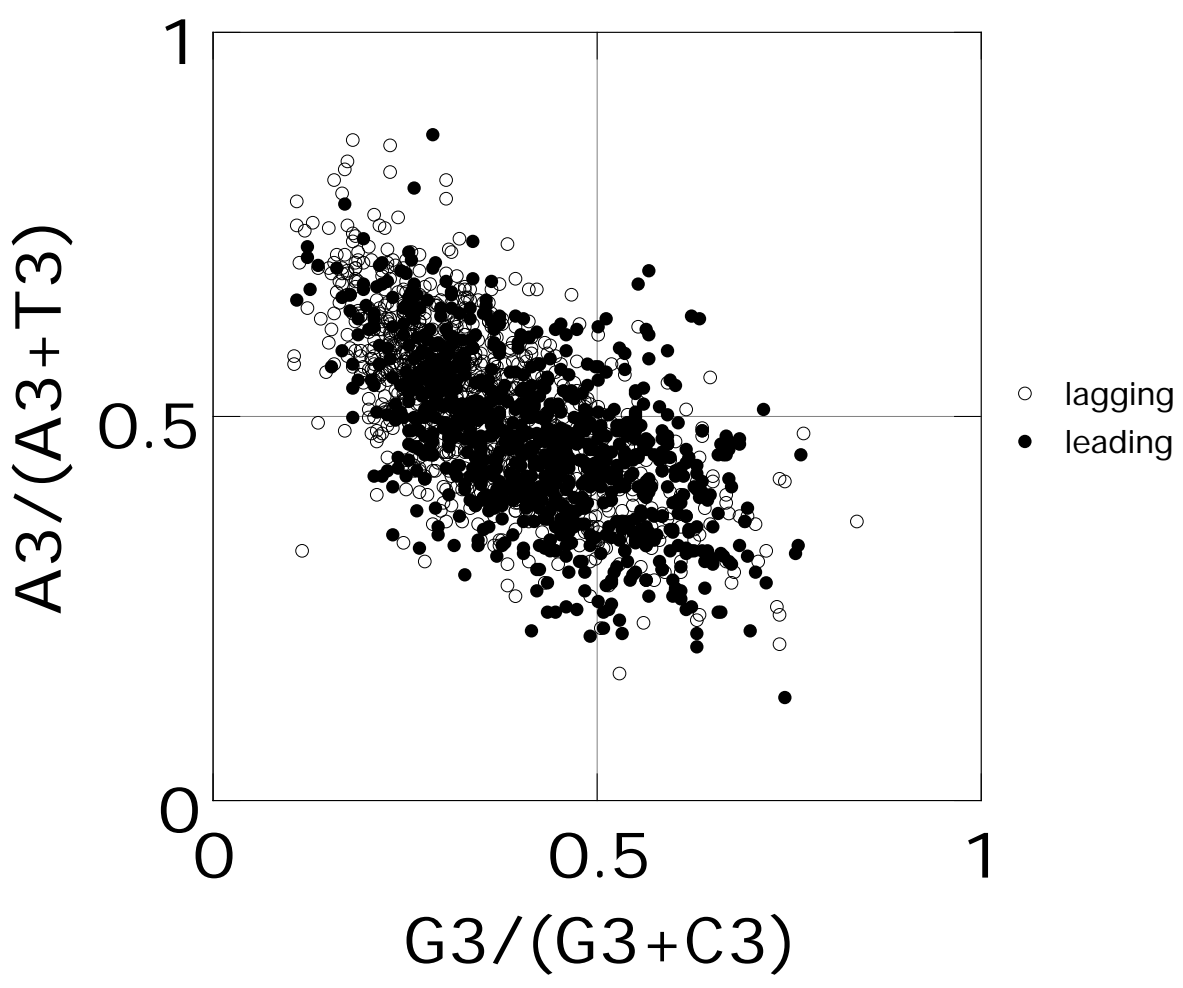

*Neisseria meningitidis* Z2491 (A)

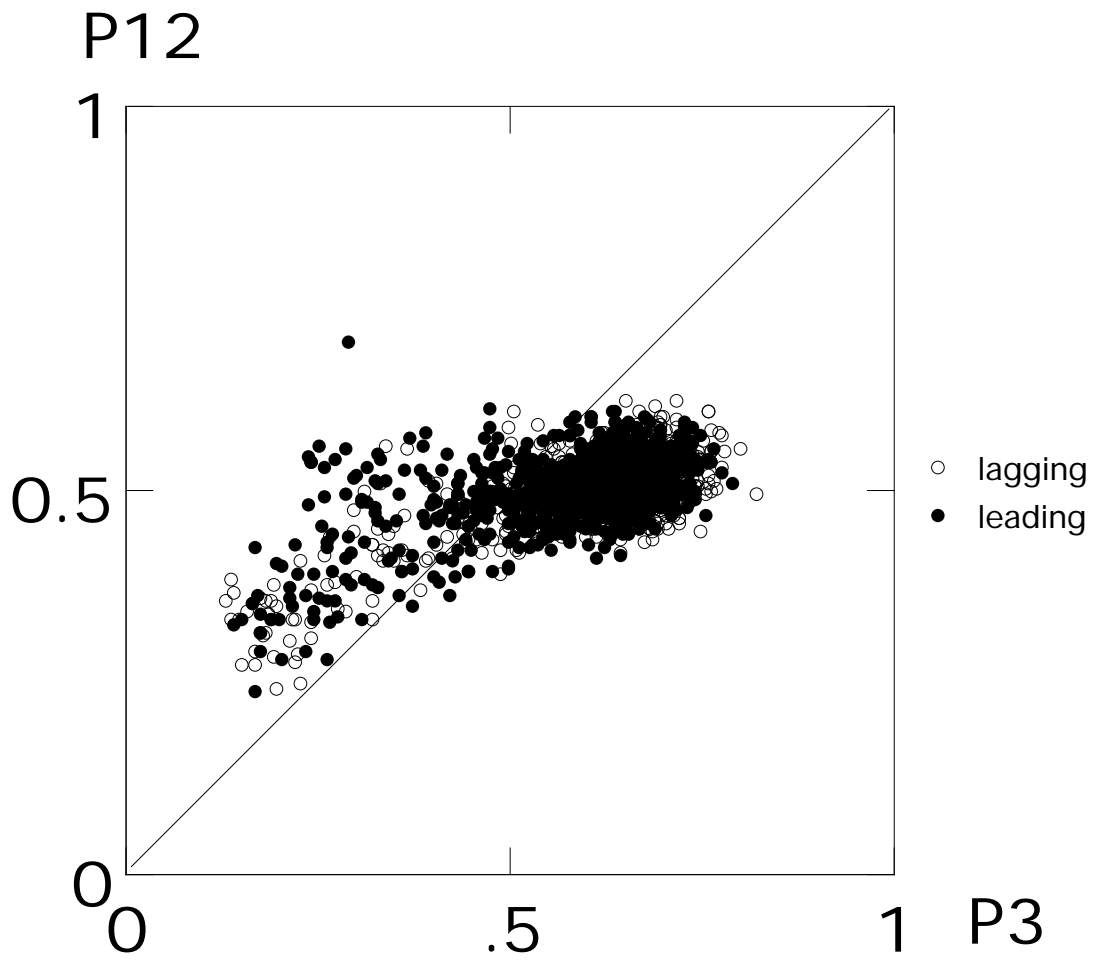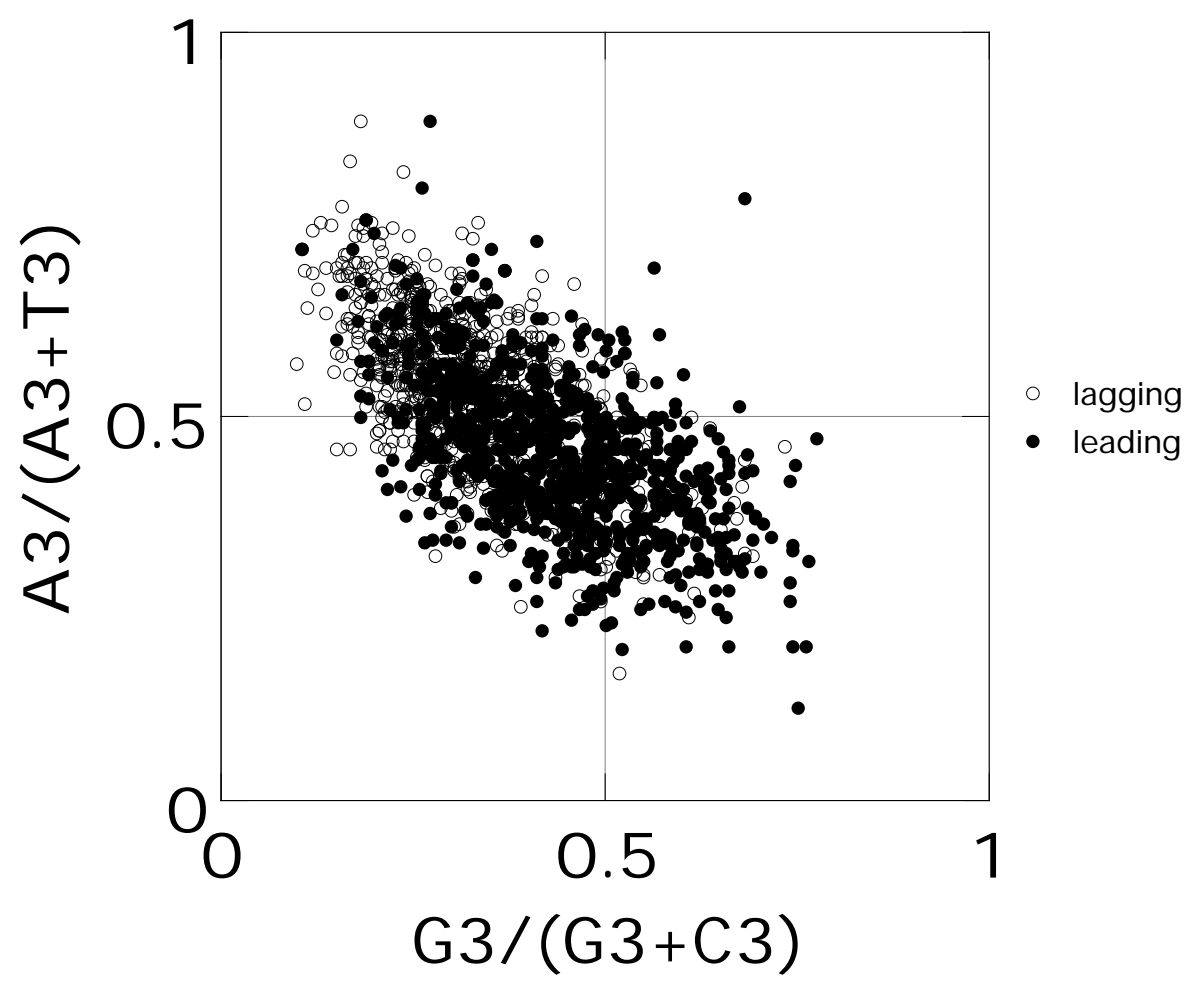

*Neisseria meningitidis* MC58 (B)



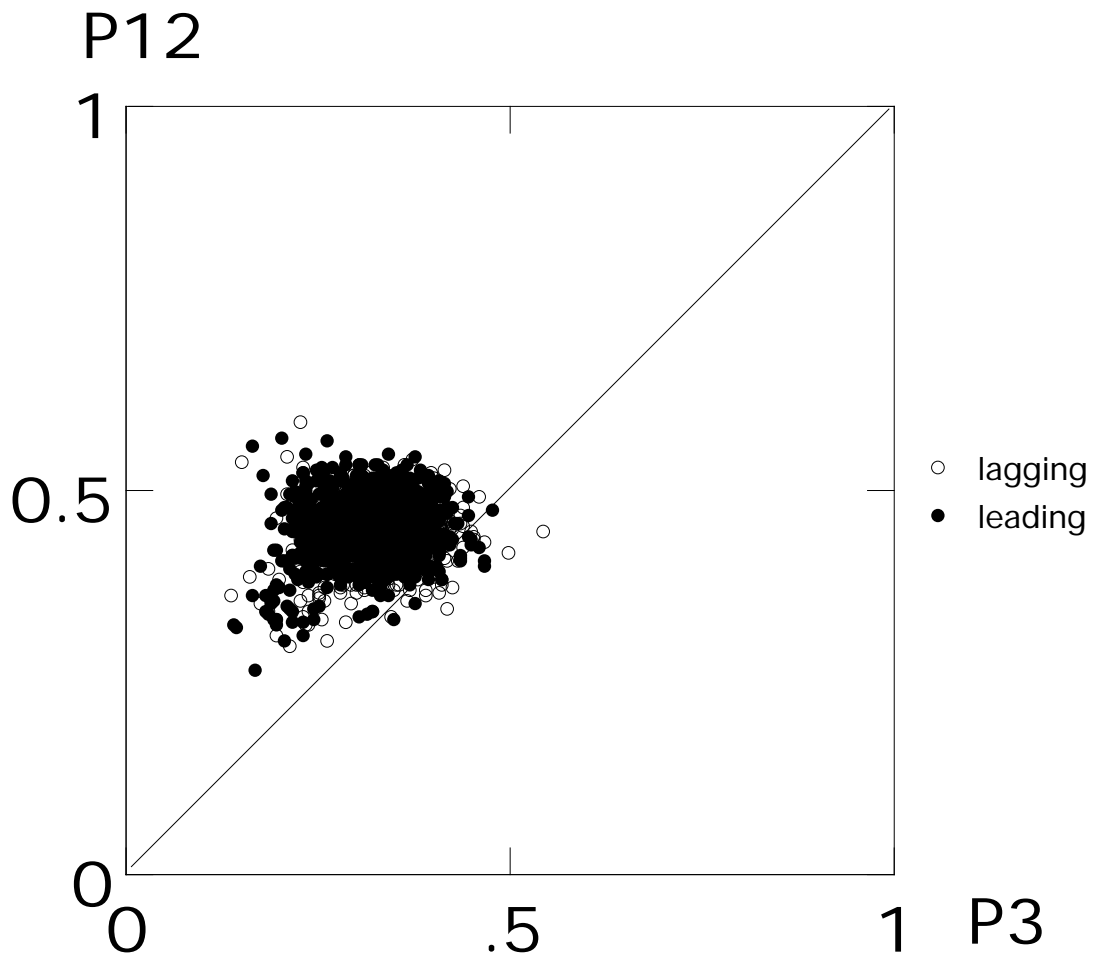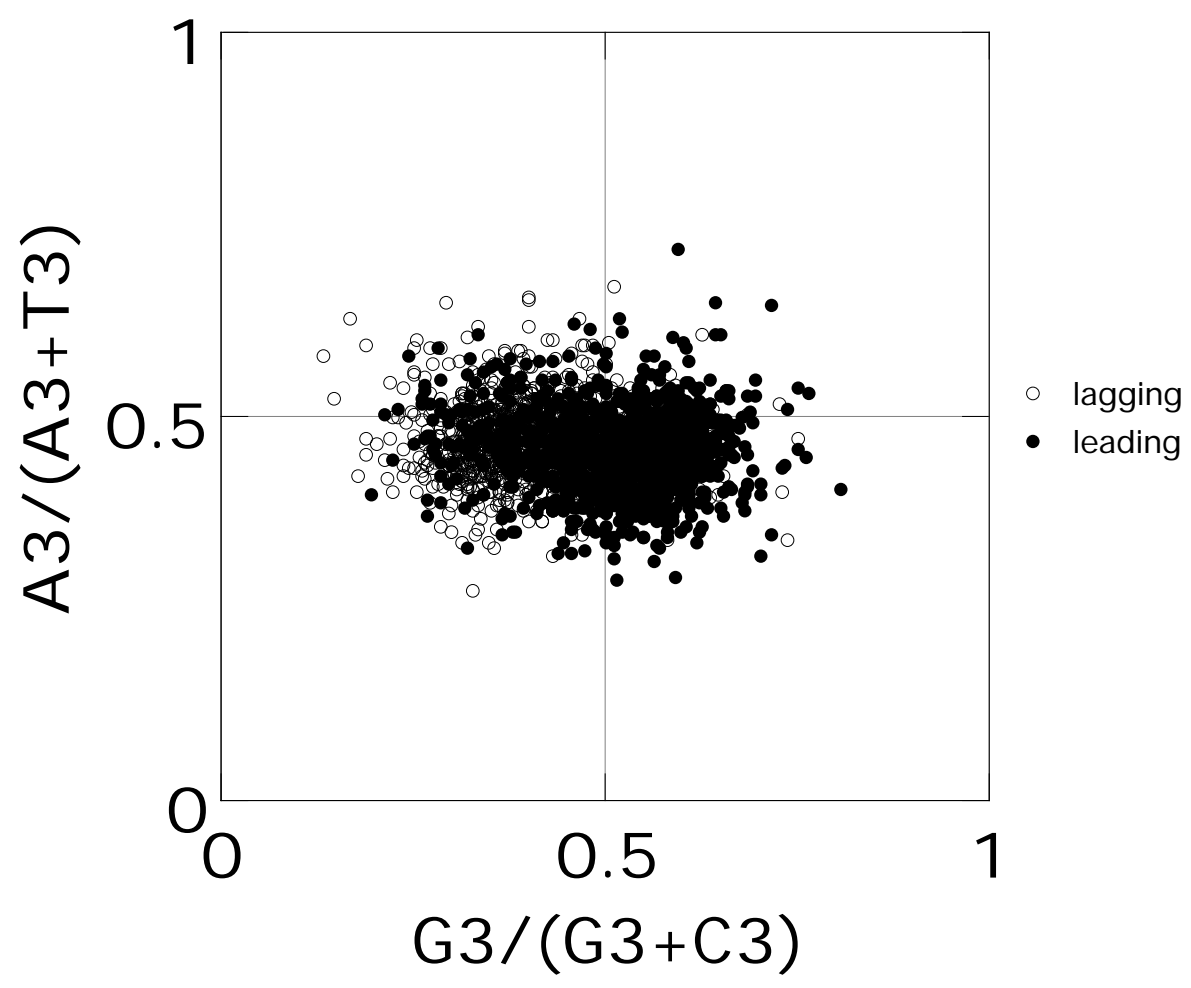

*Pasteurella multocida*

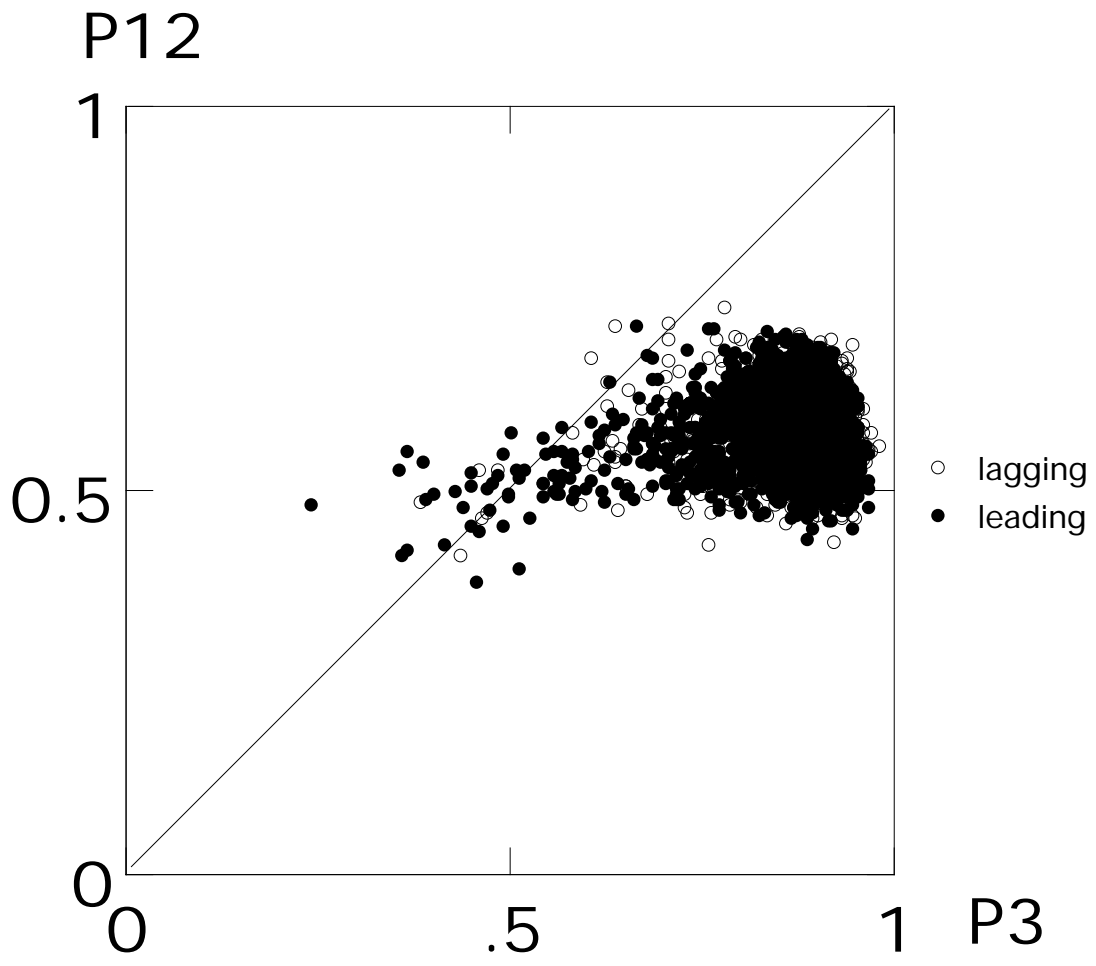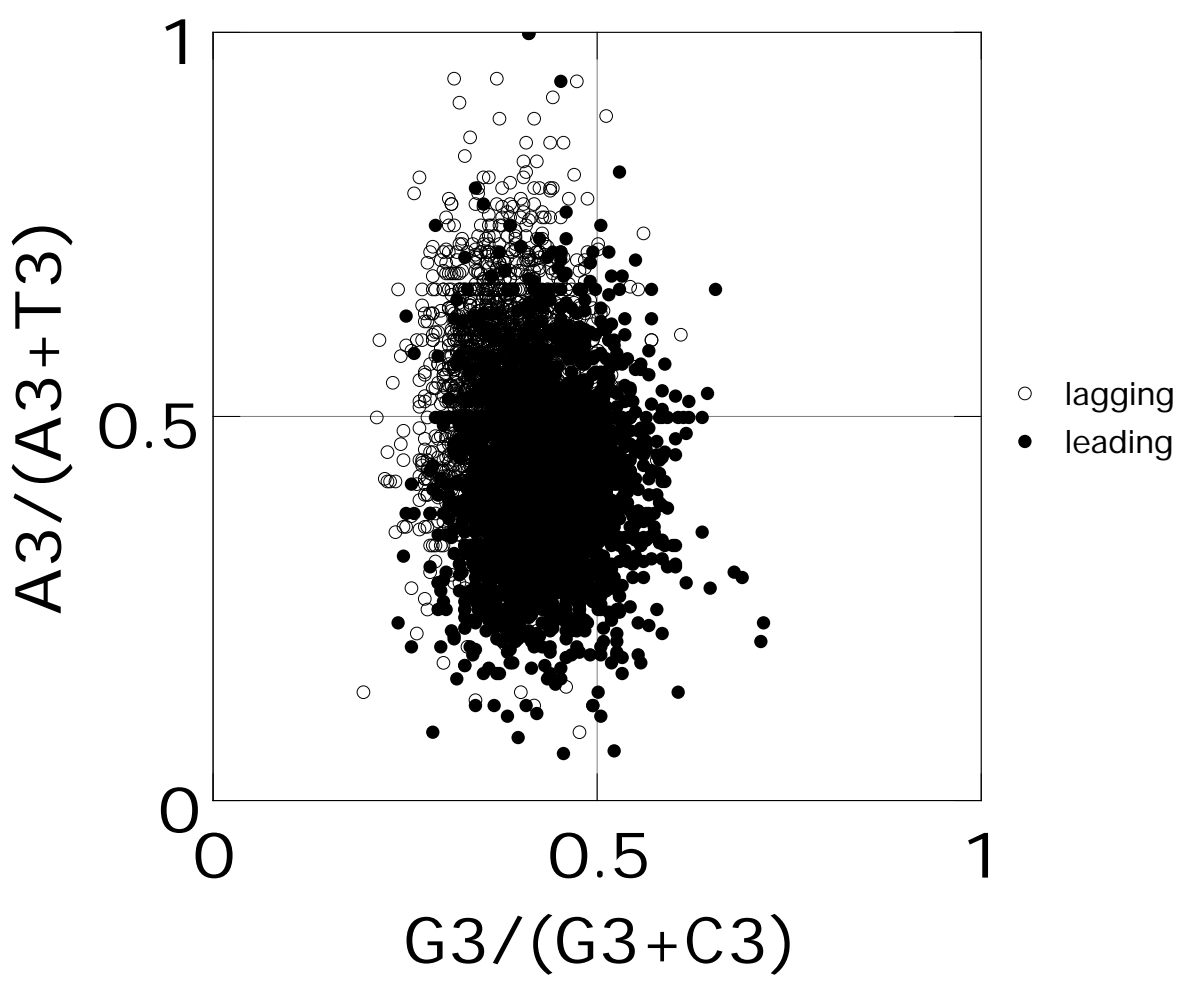

*Pseudomonas aeruginosa*

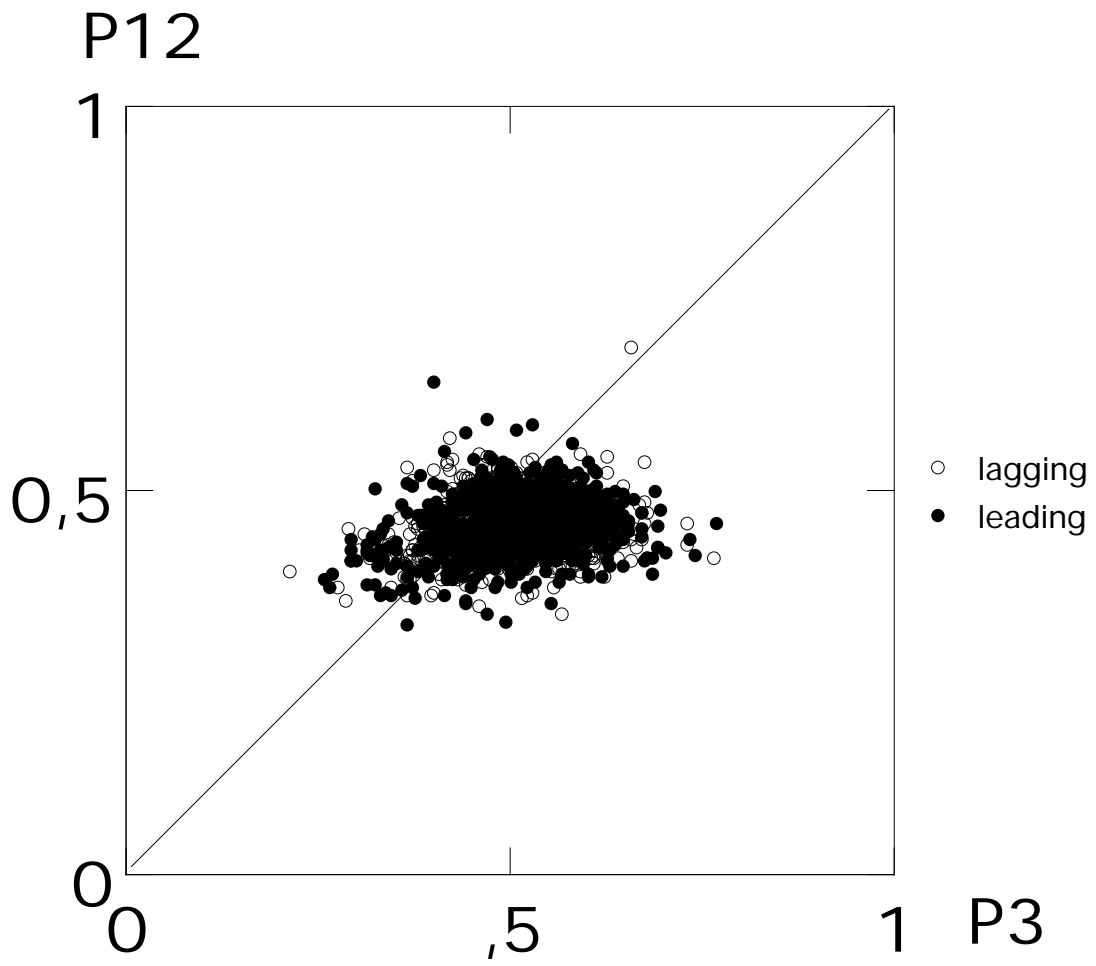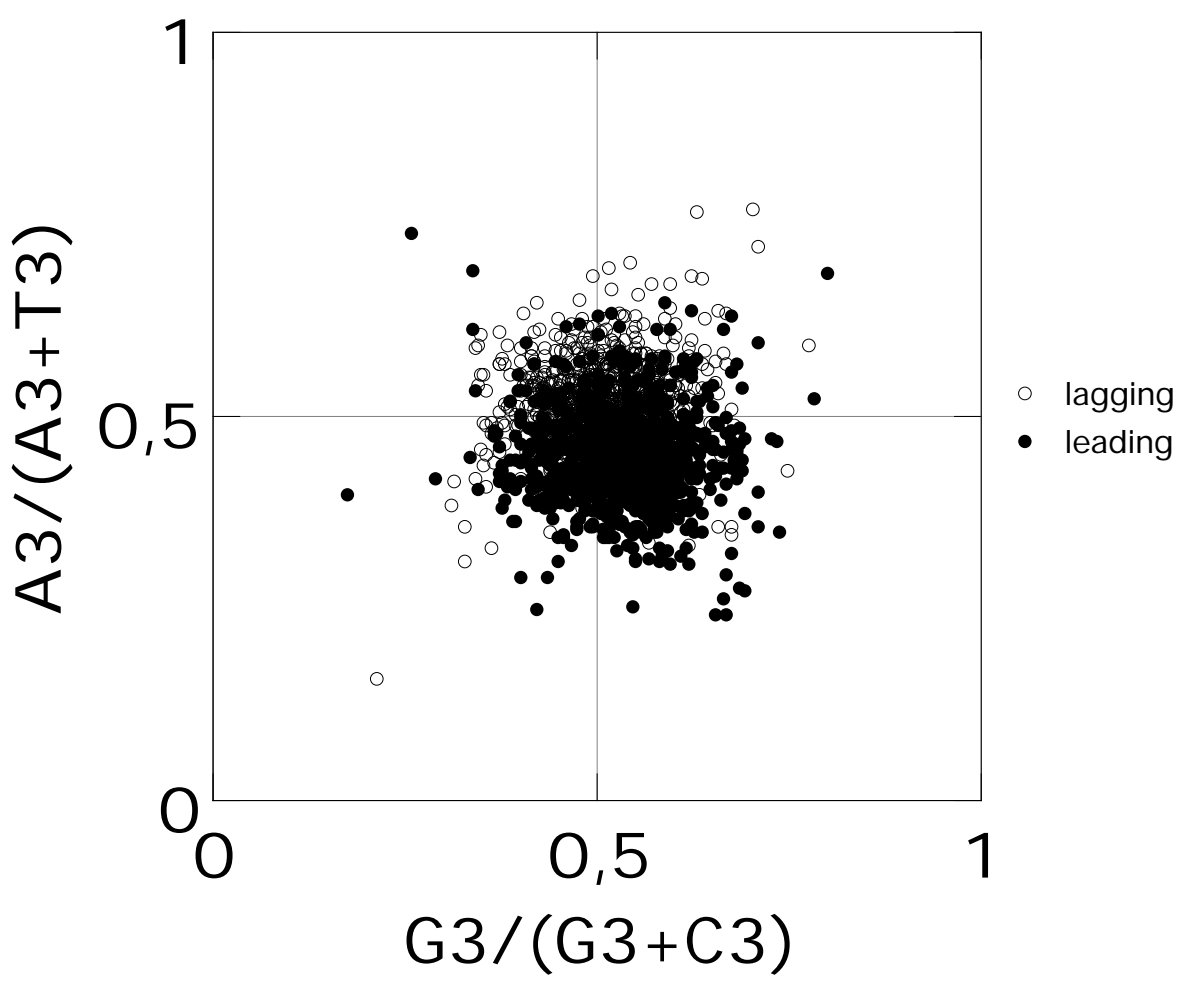

*Pyrococcus abyssi*

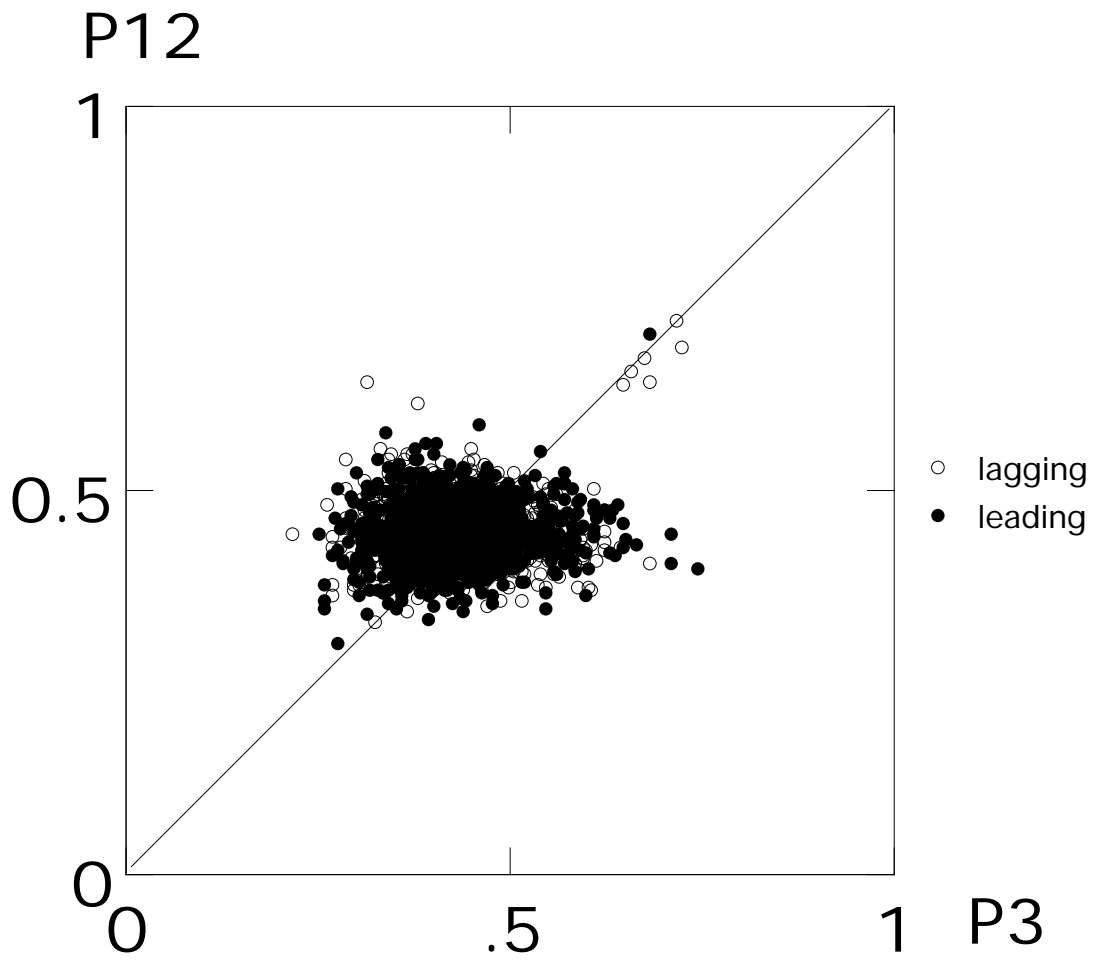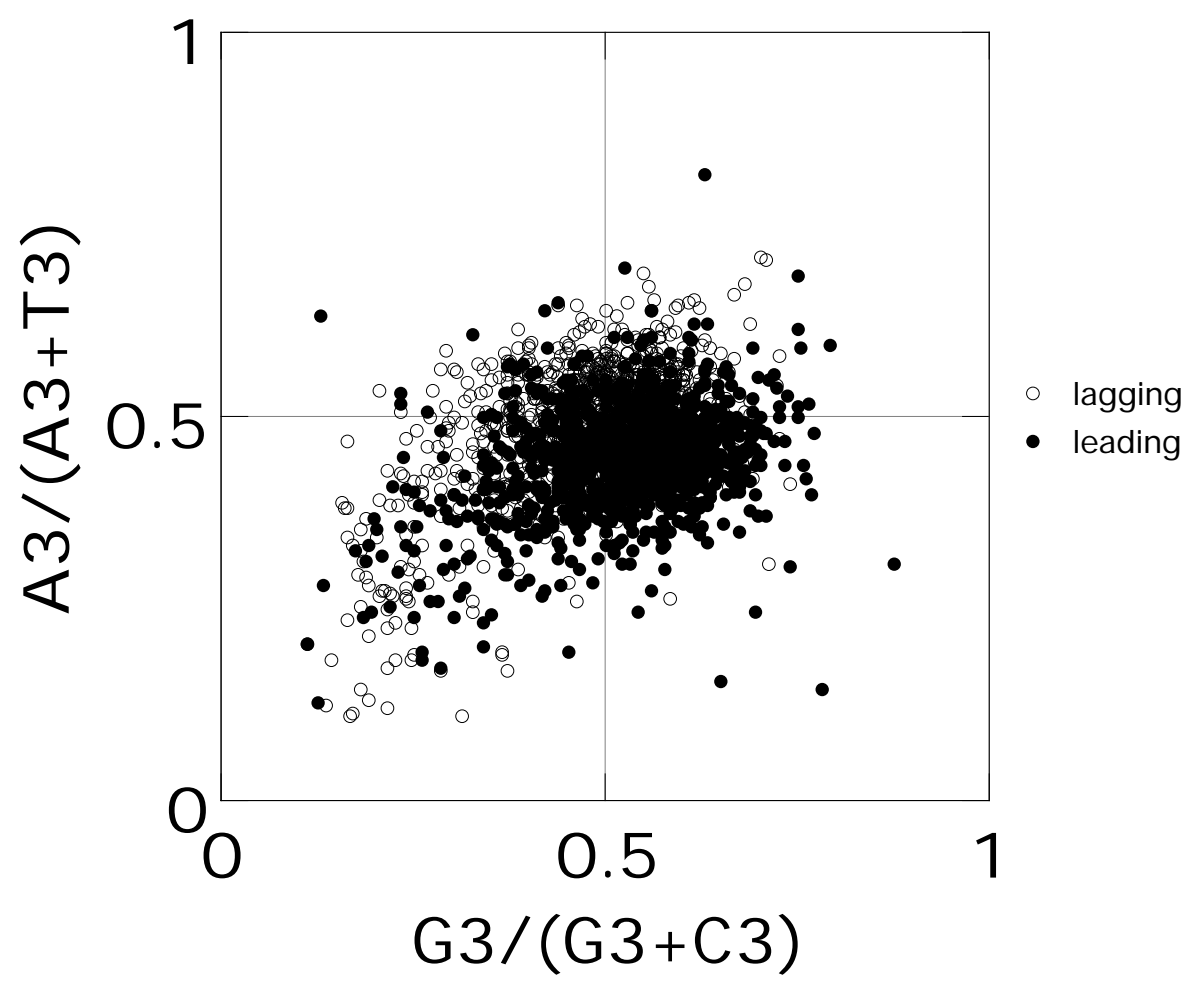

*Pyrococcus horikoshii*

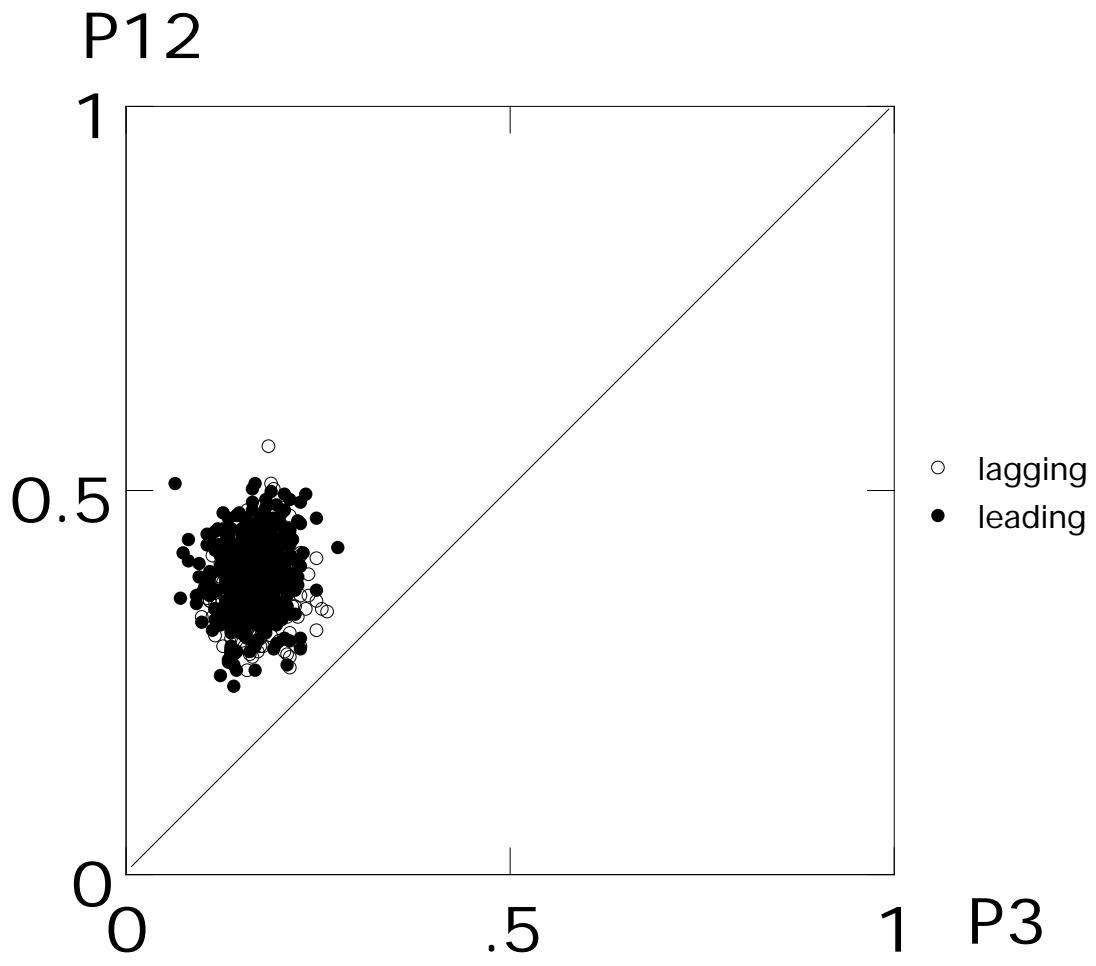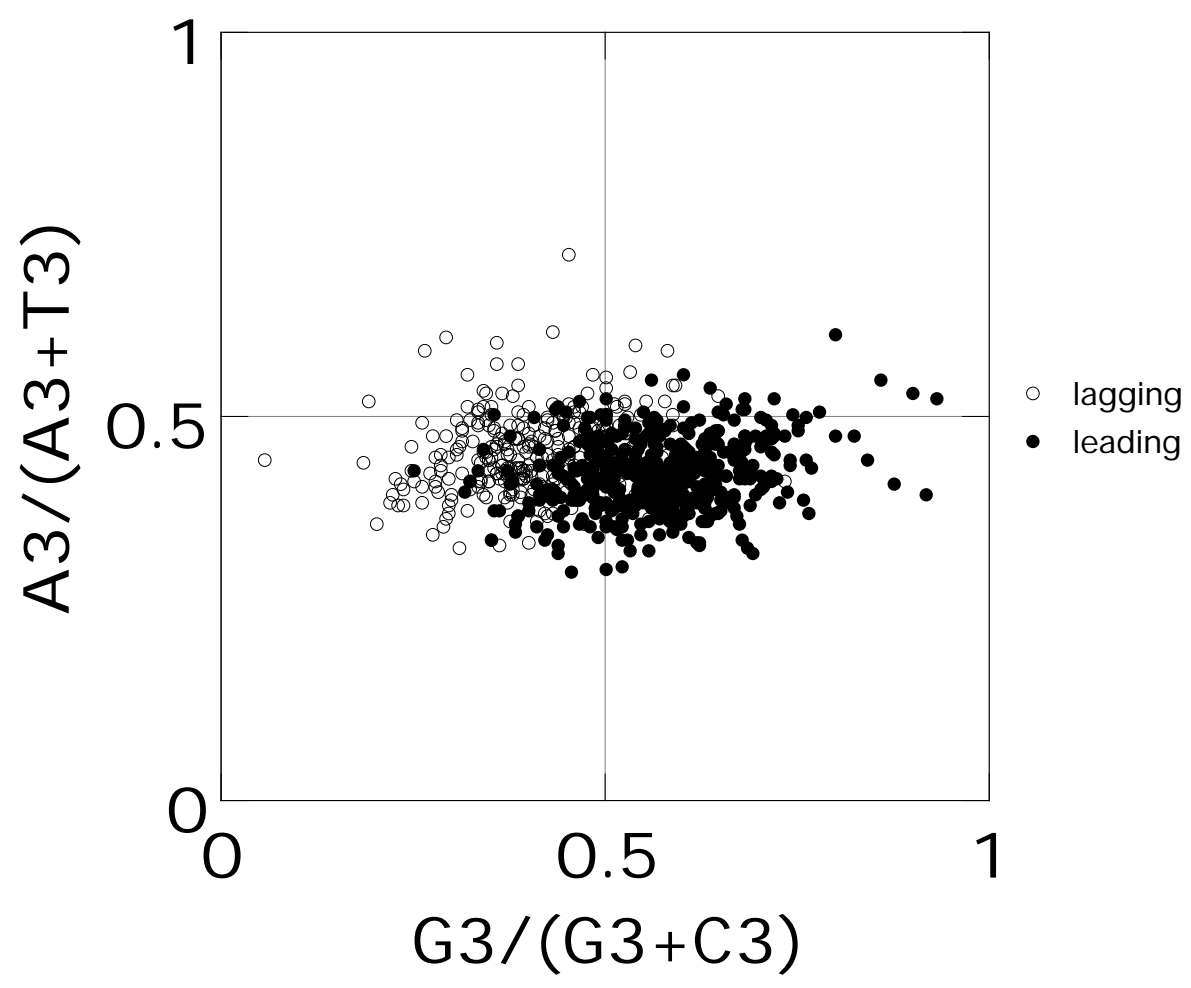

*Rickettsia prowazekii*

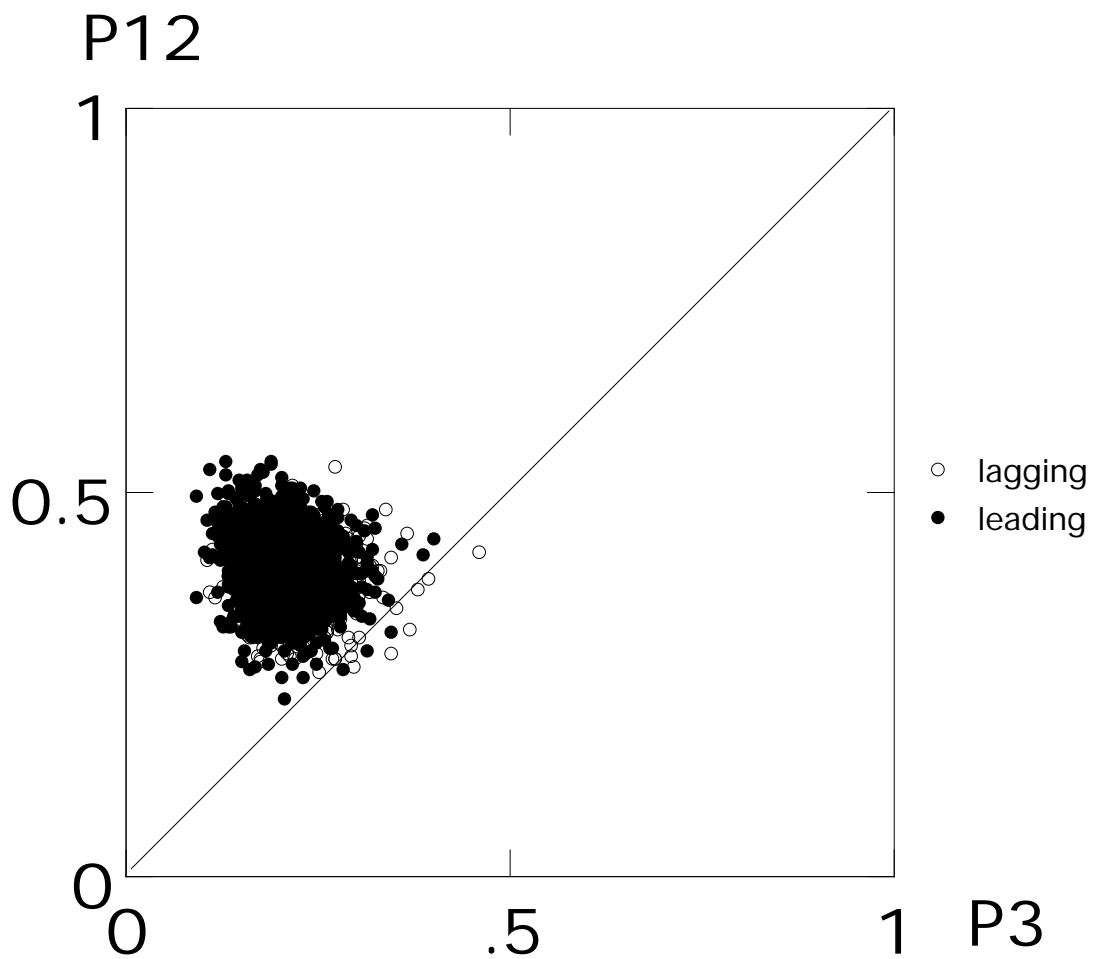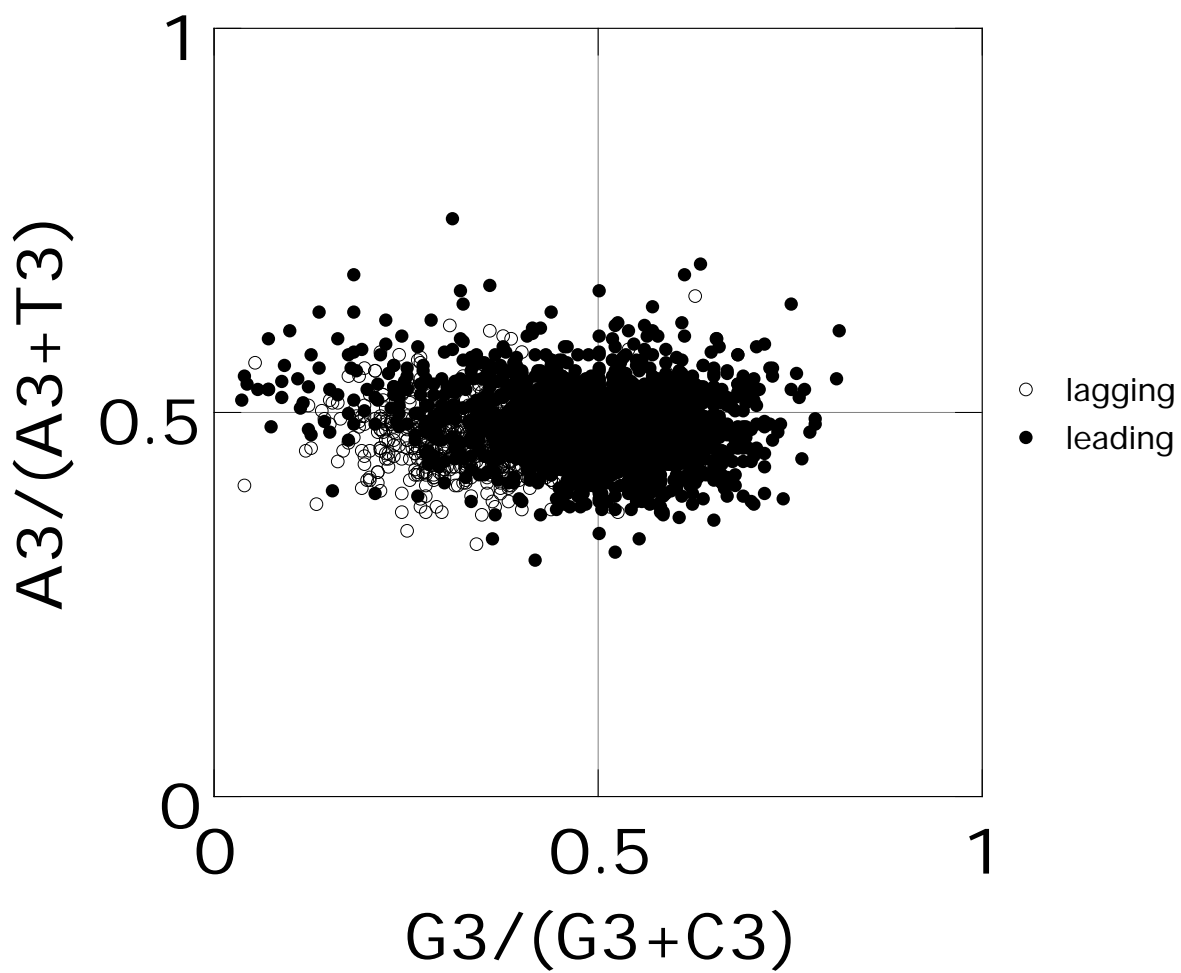

*Staphylococcus aureus* Mu50

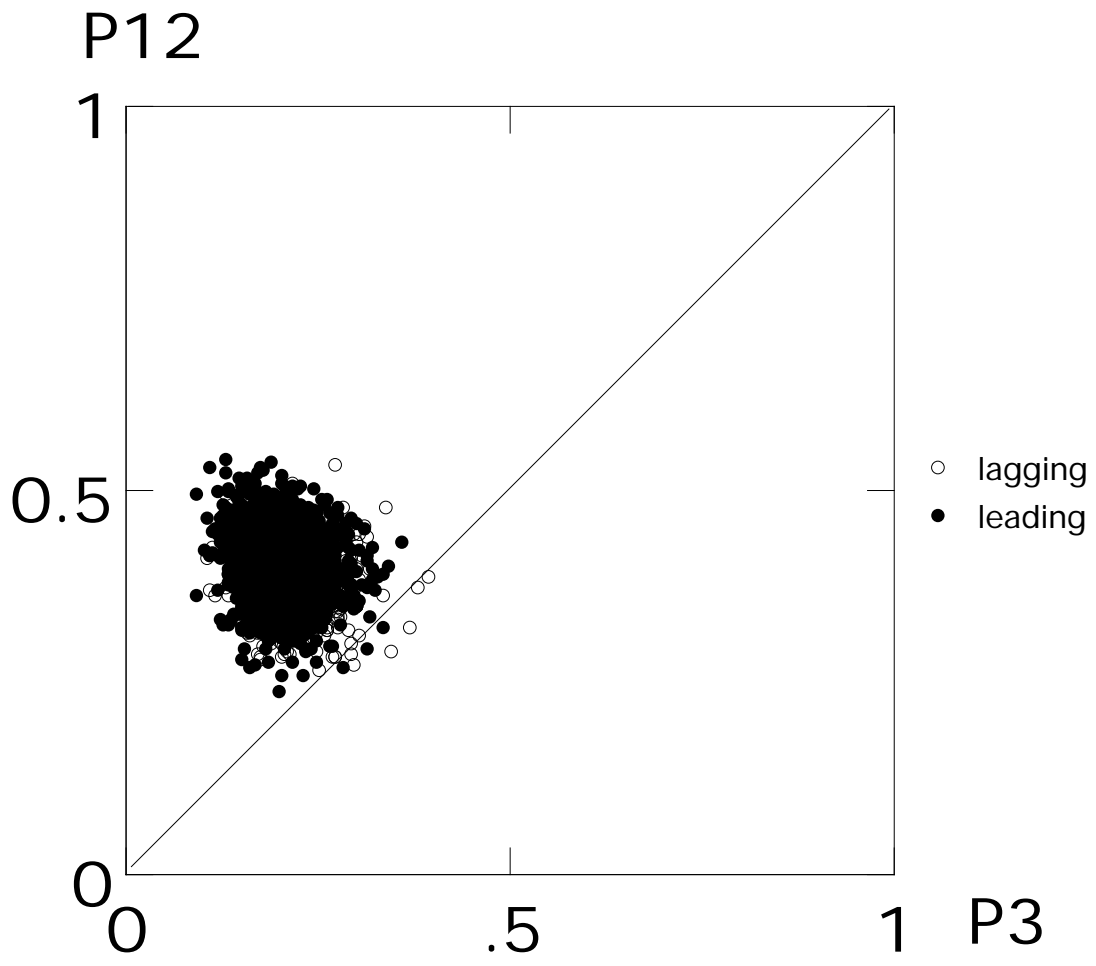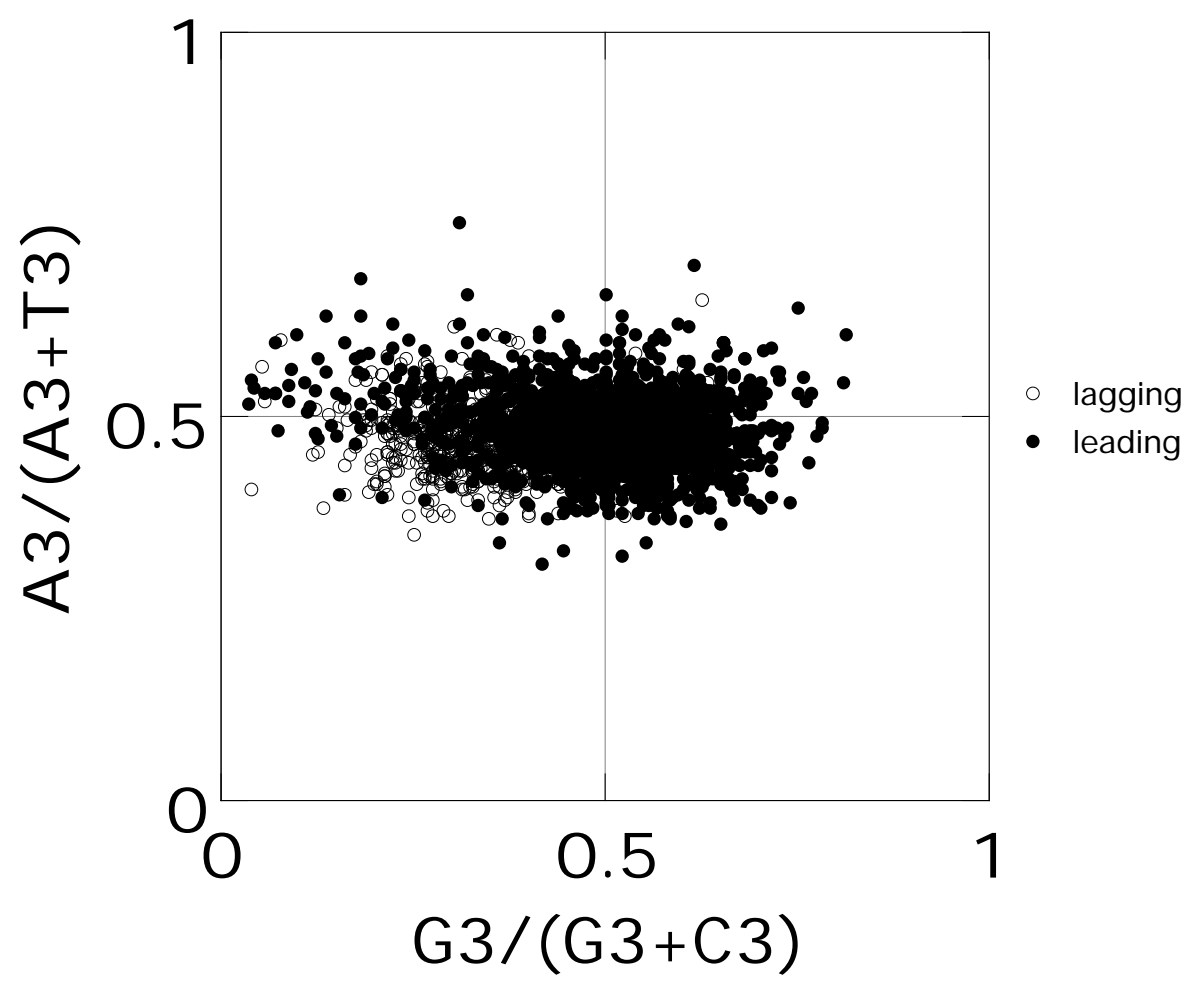

*Staphylococcus aureus* N315

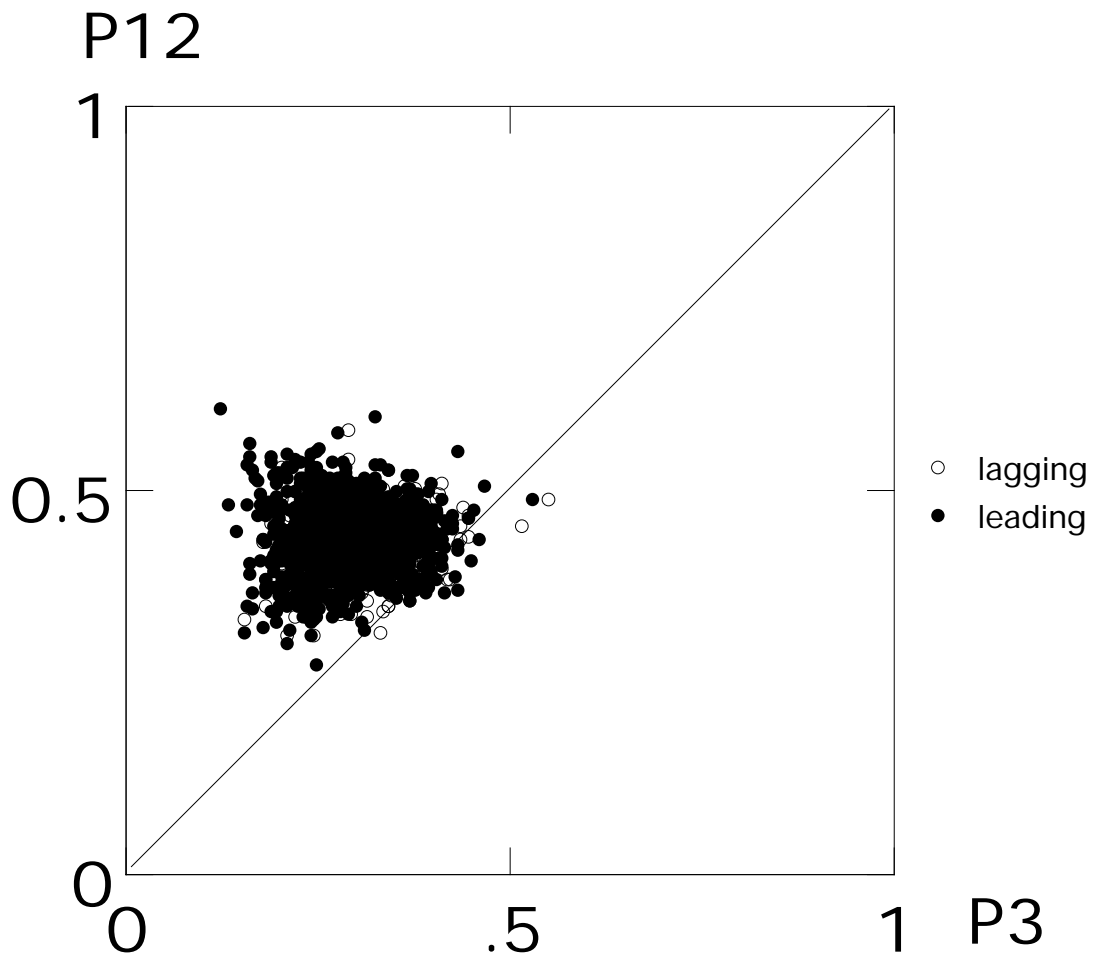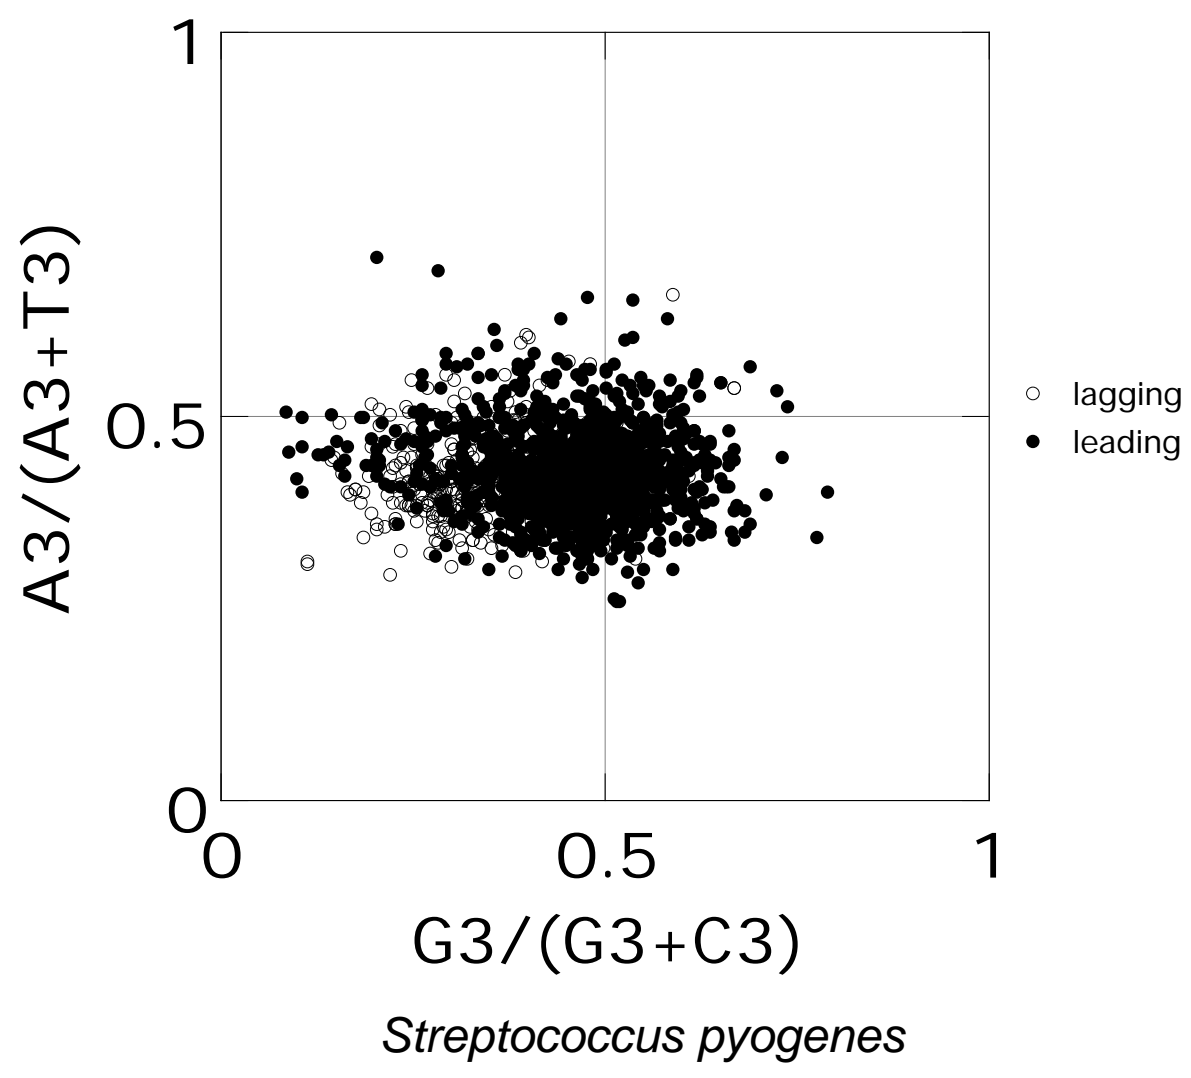



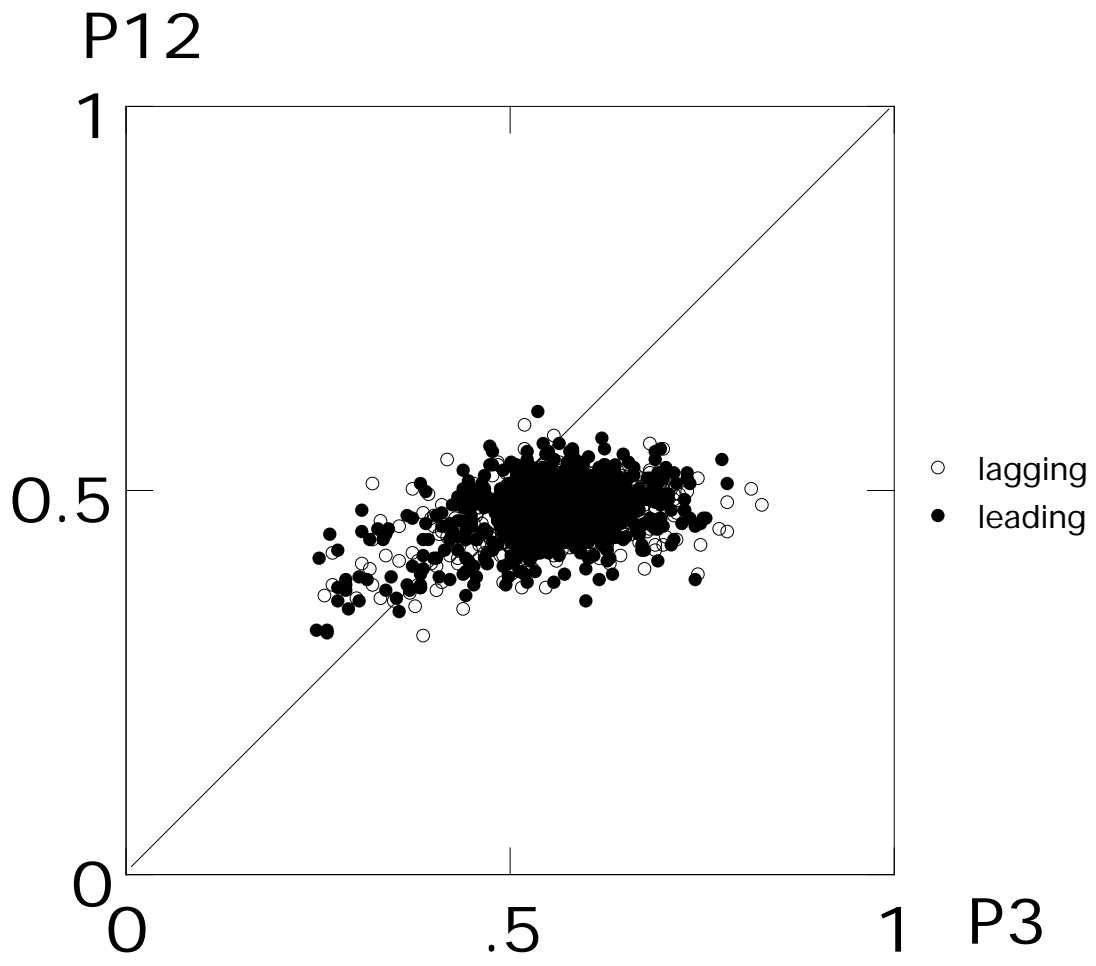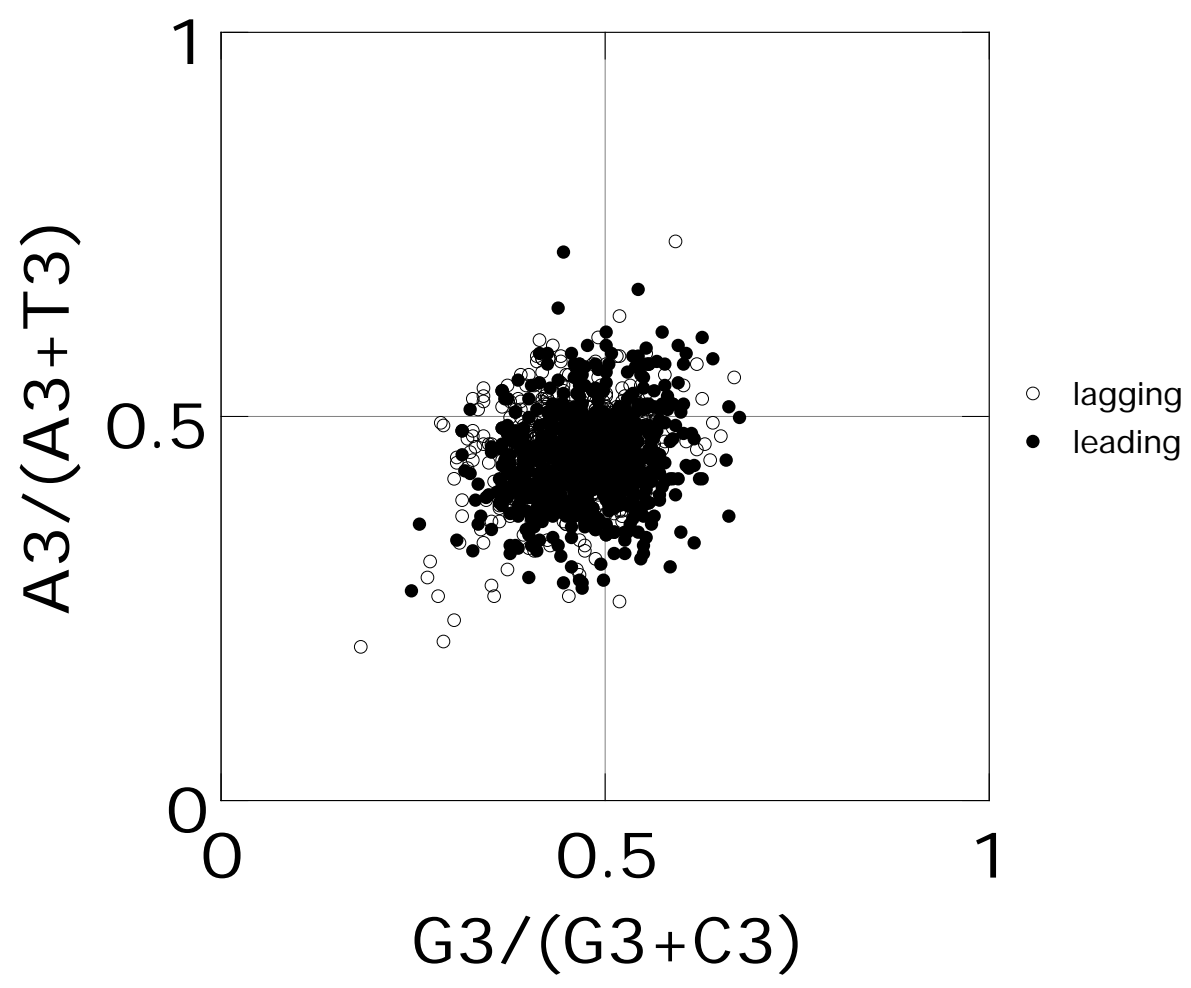

*Thermoplasma acidophilum*

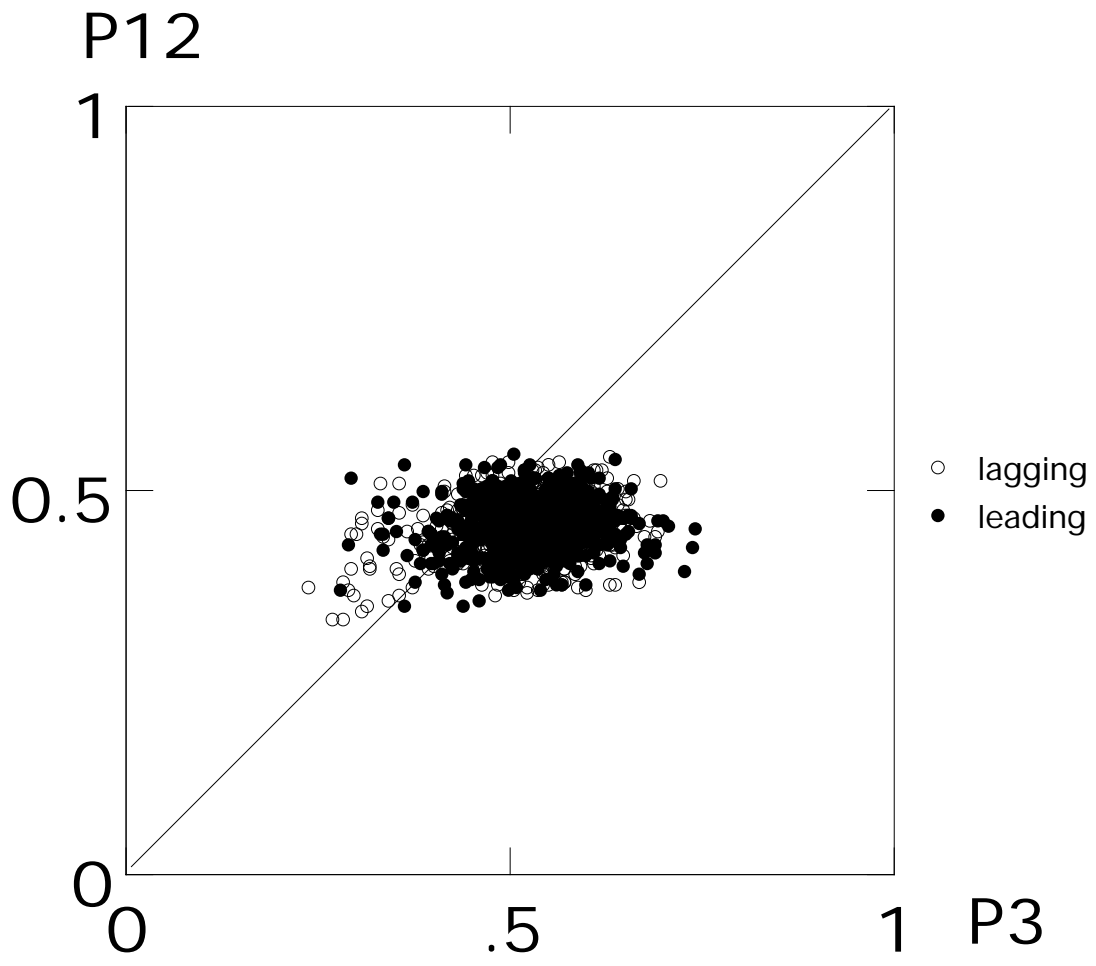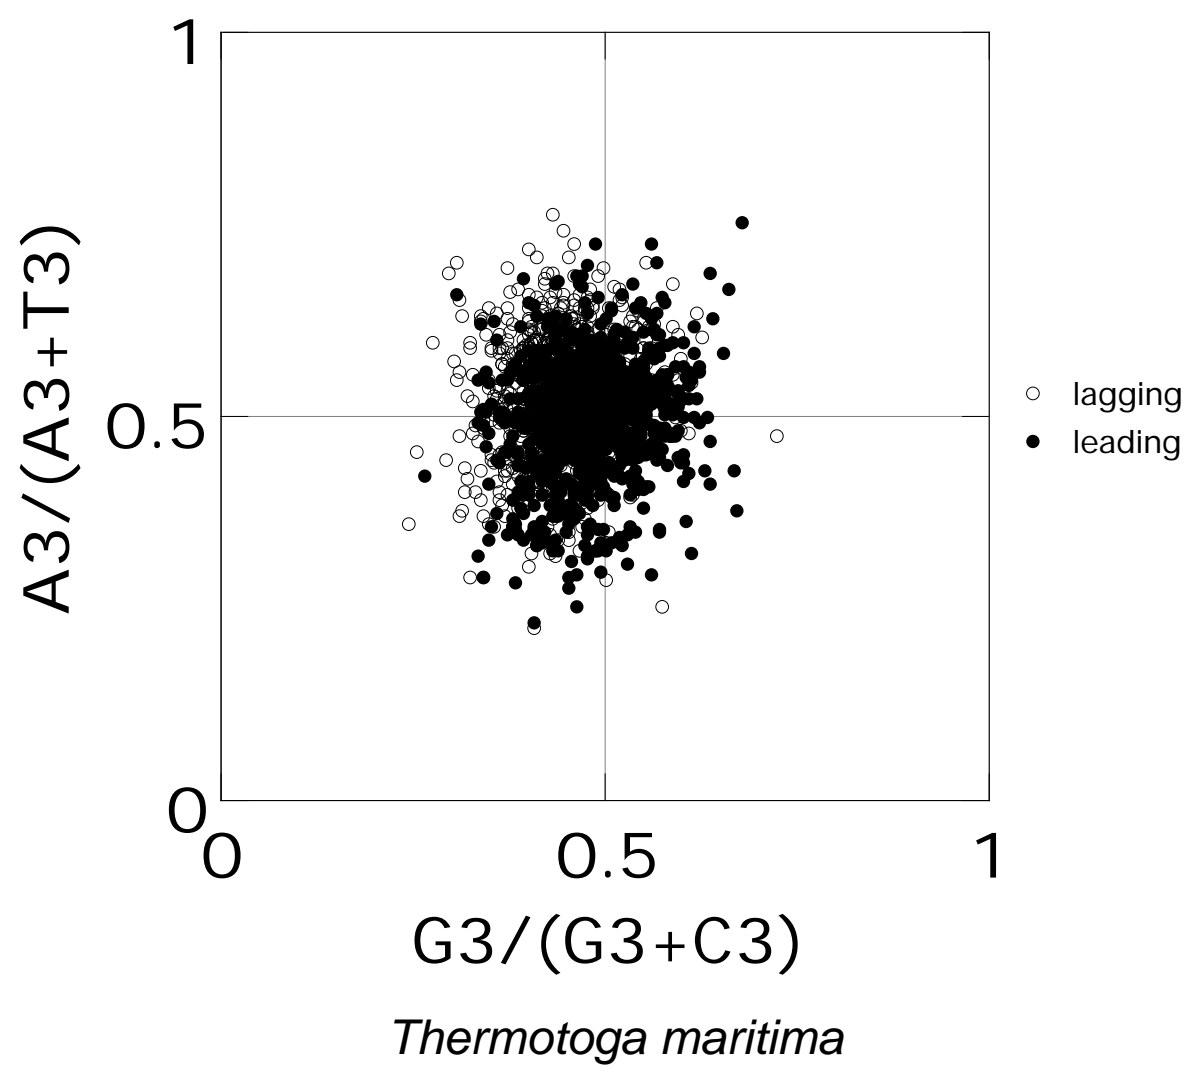

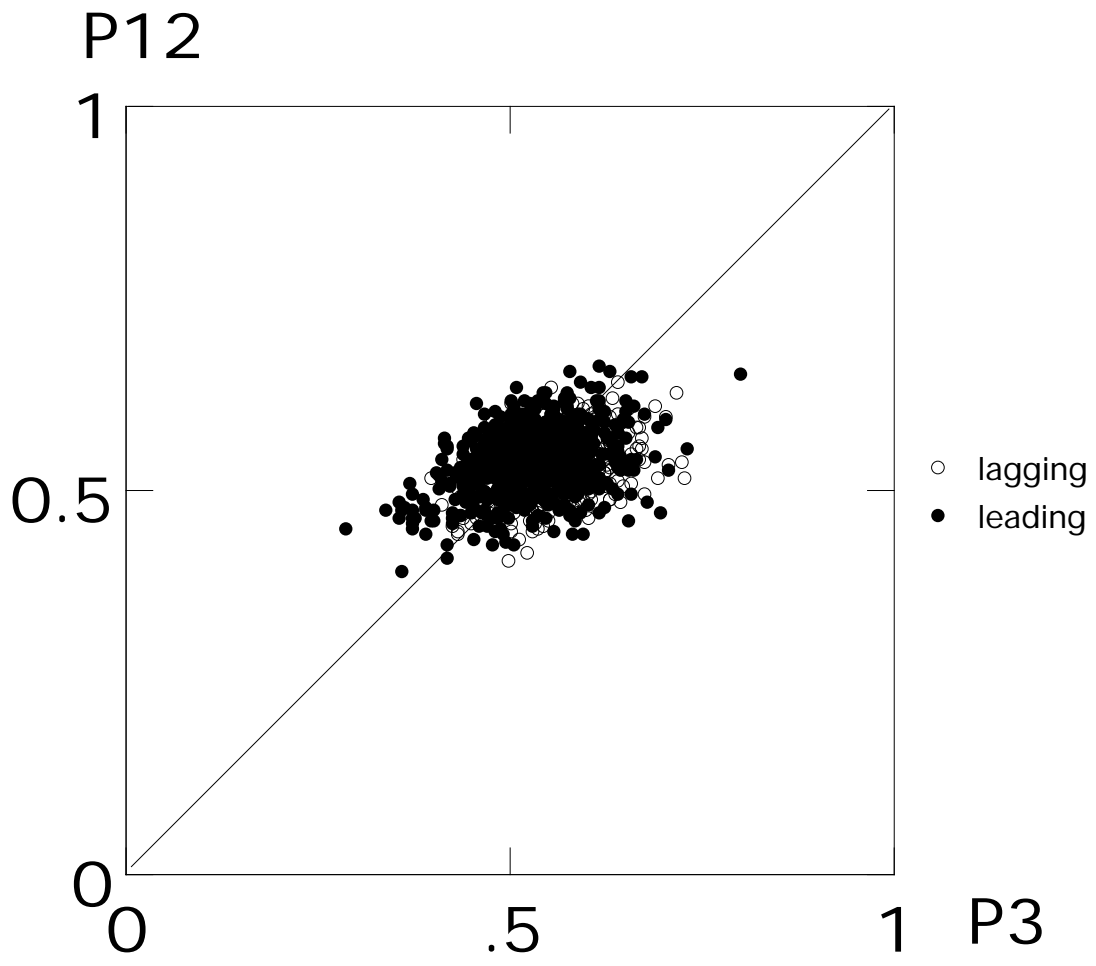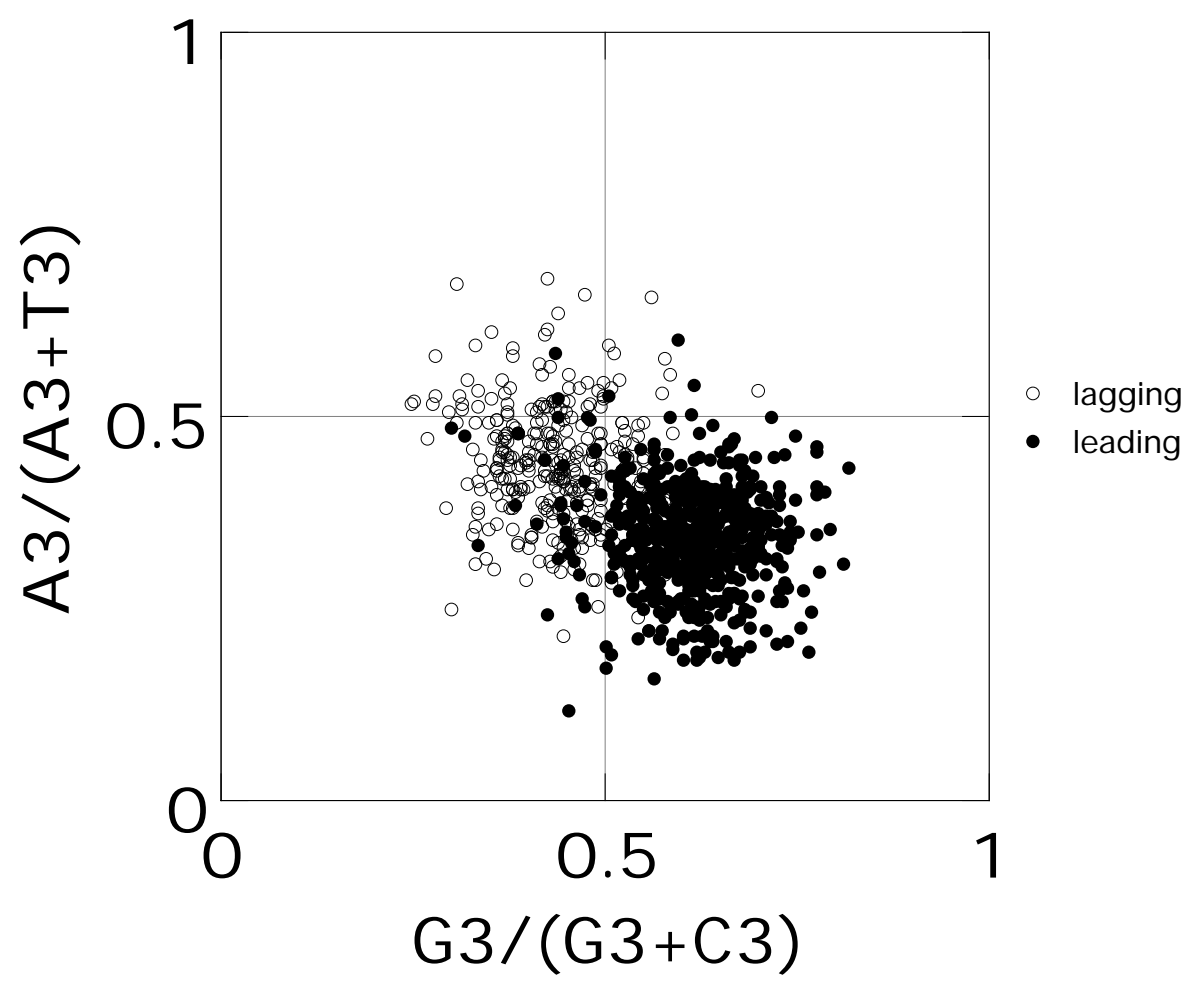

*Treponema pallidum*

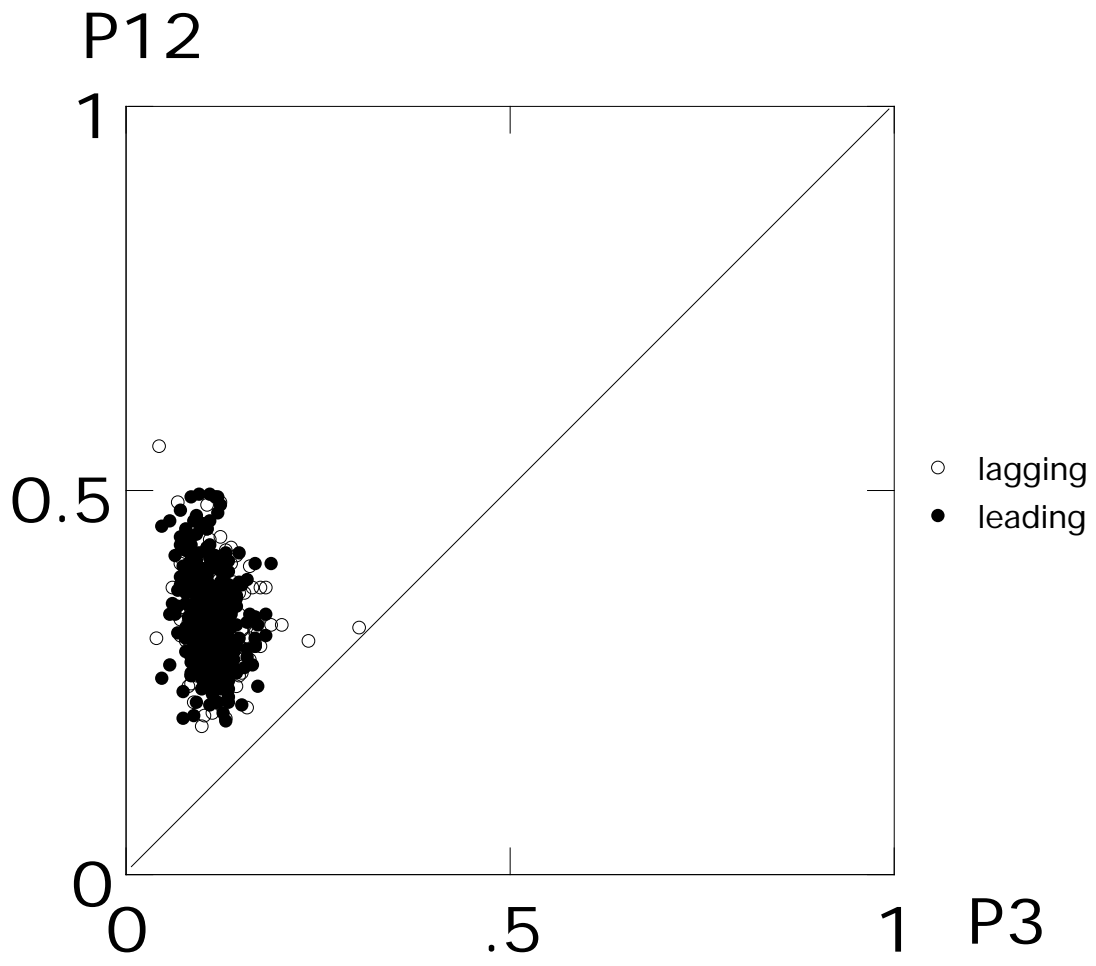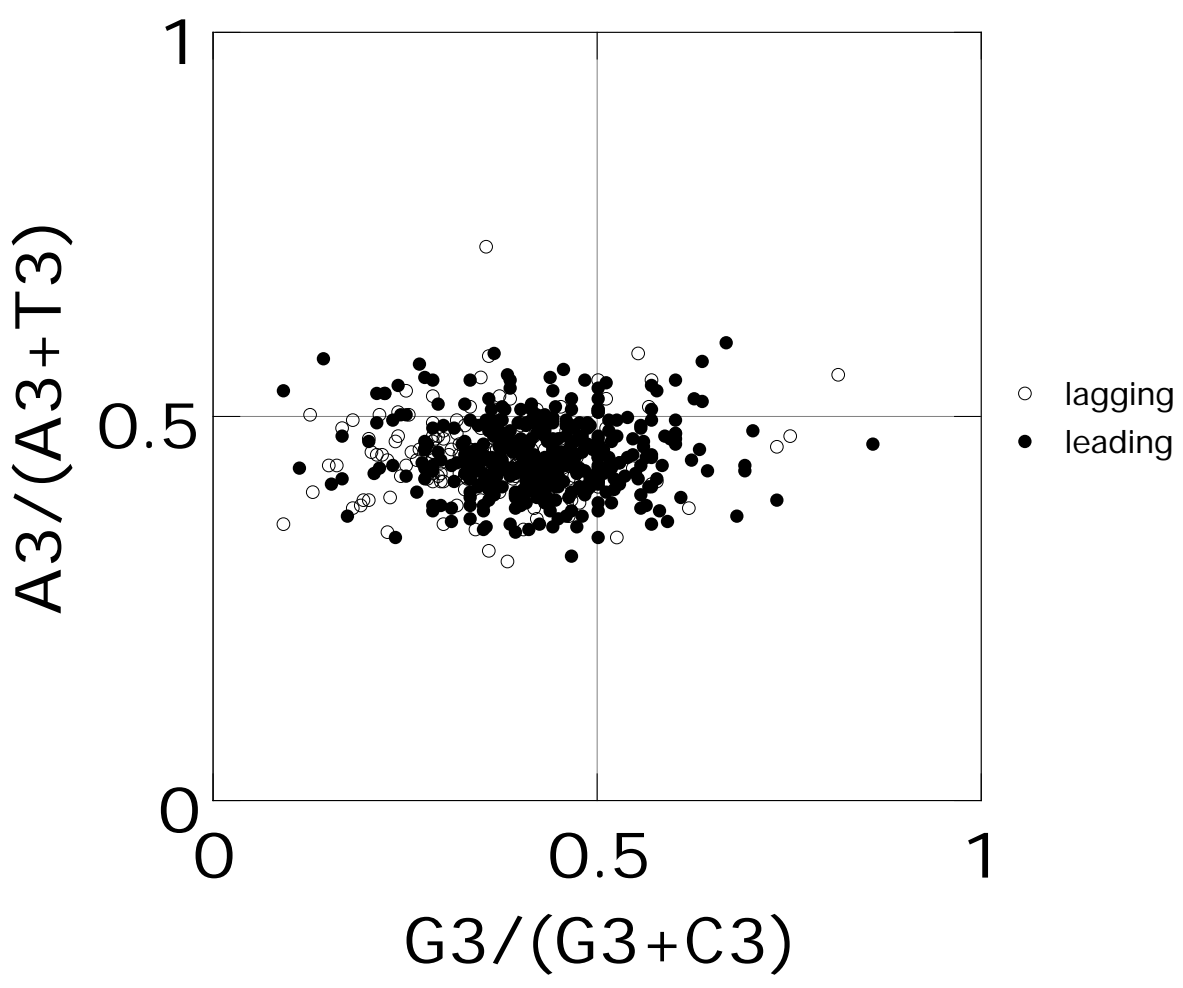

*Ureaplasma urealyticum*

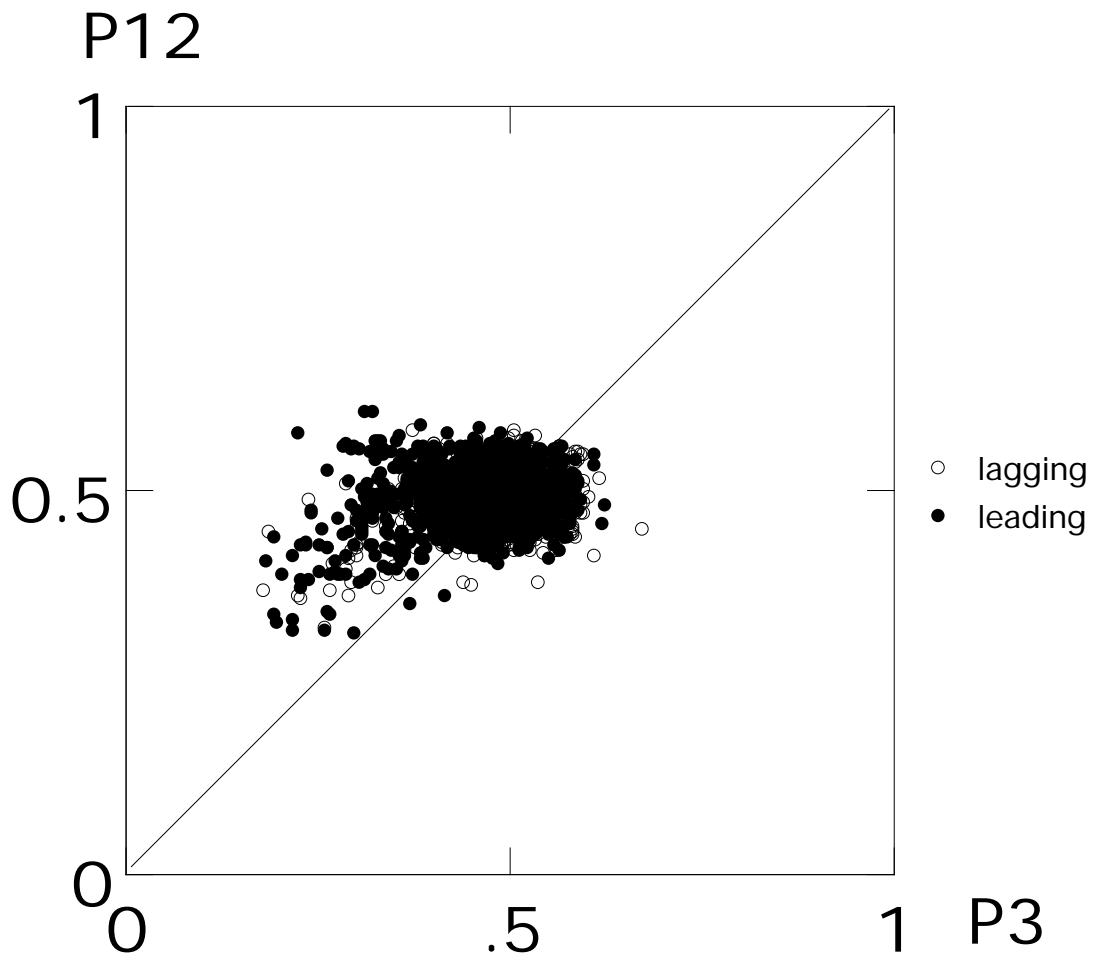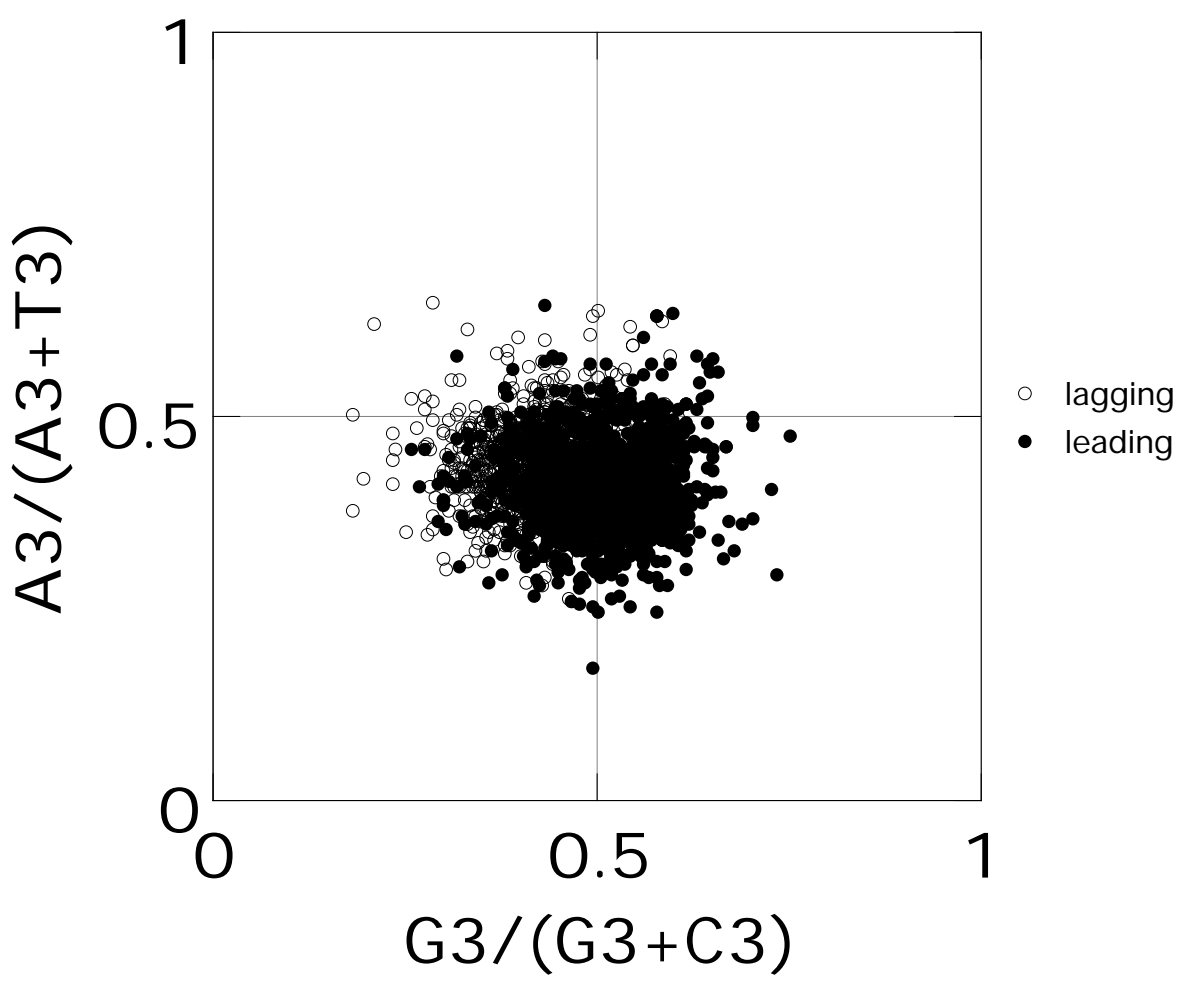

*Vibrio cholerae* chromosome 1

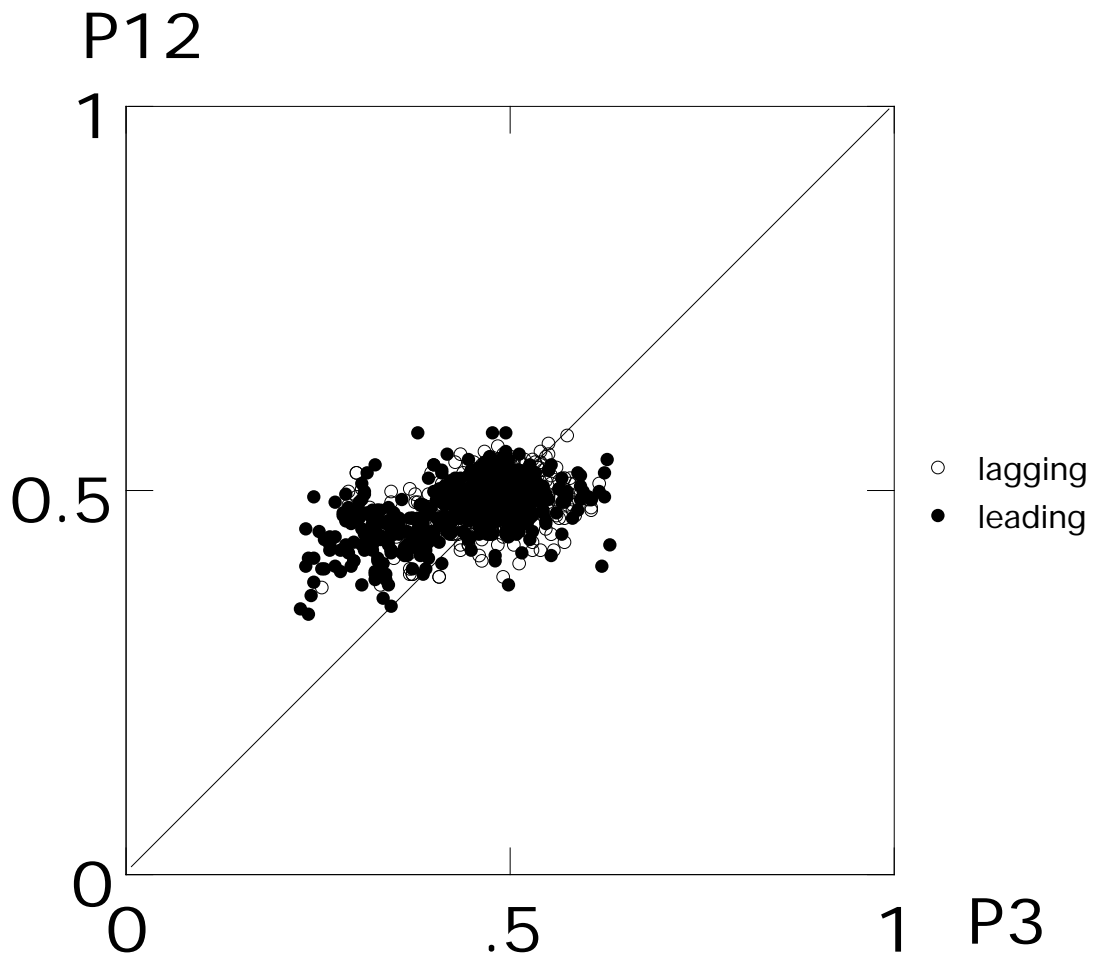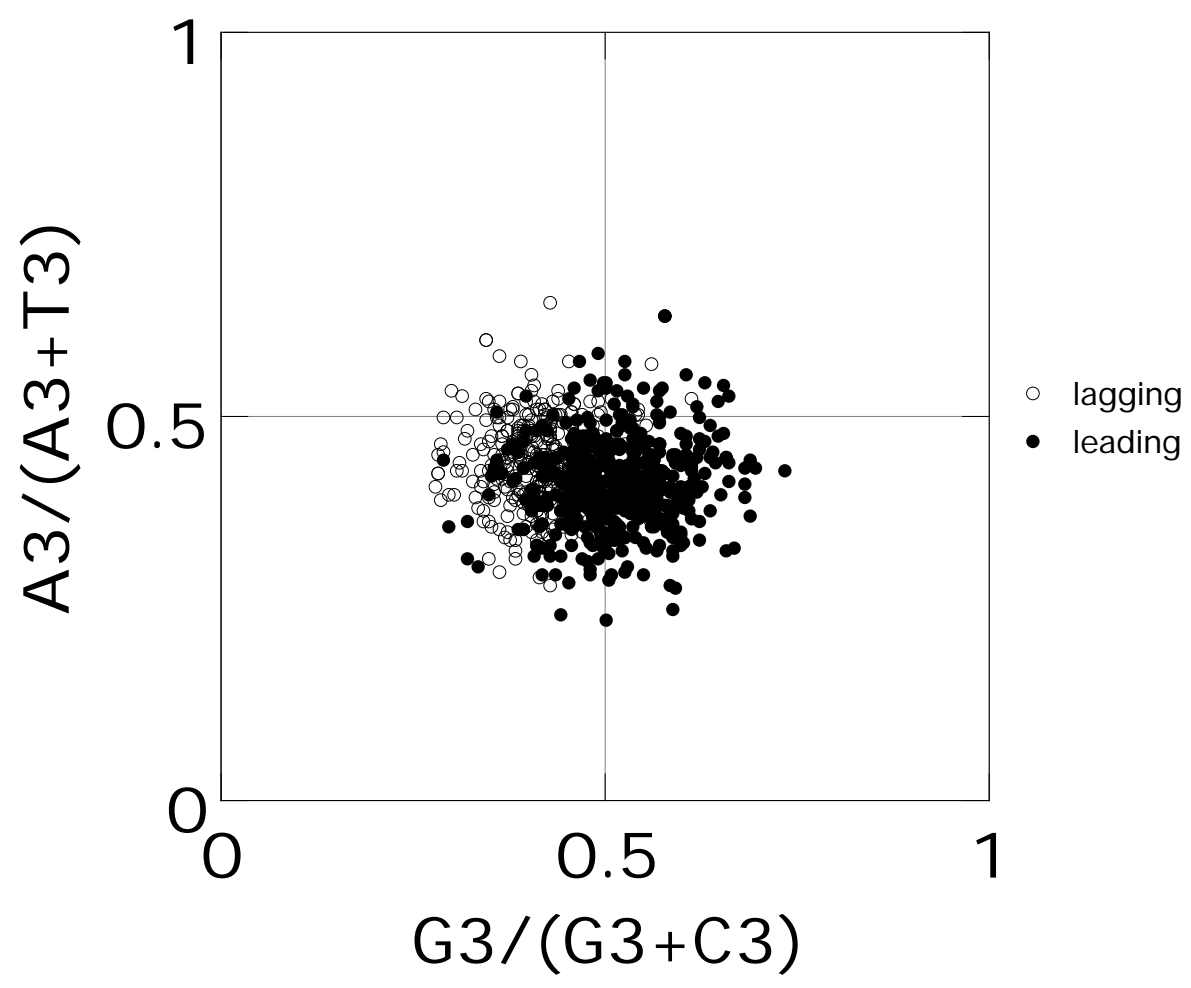

*Vibrio cholerae* chromosome 2

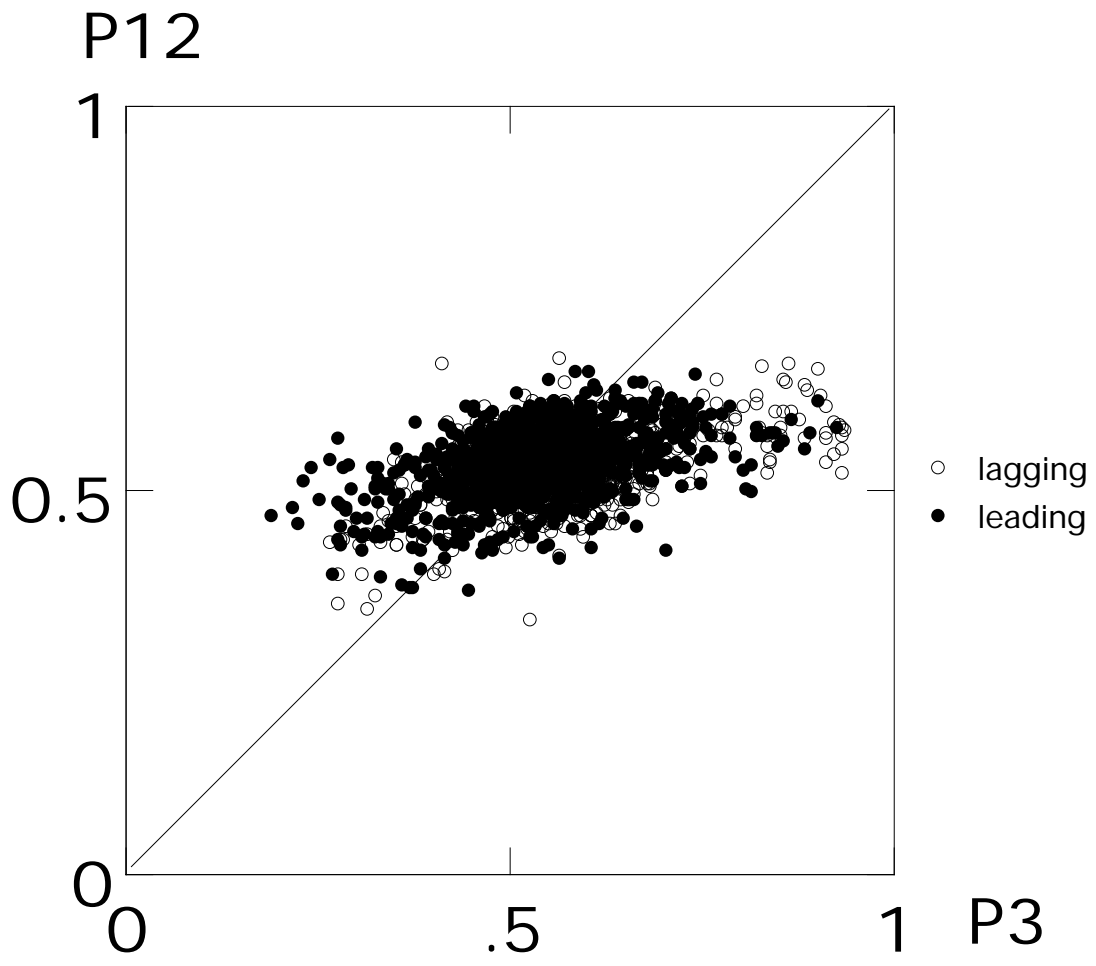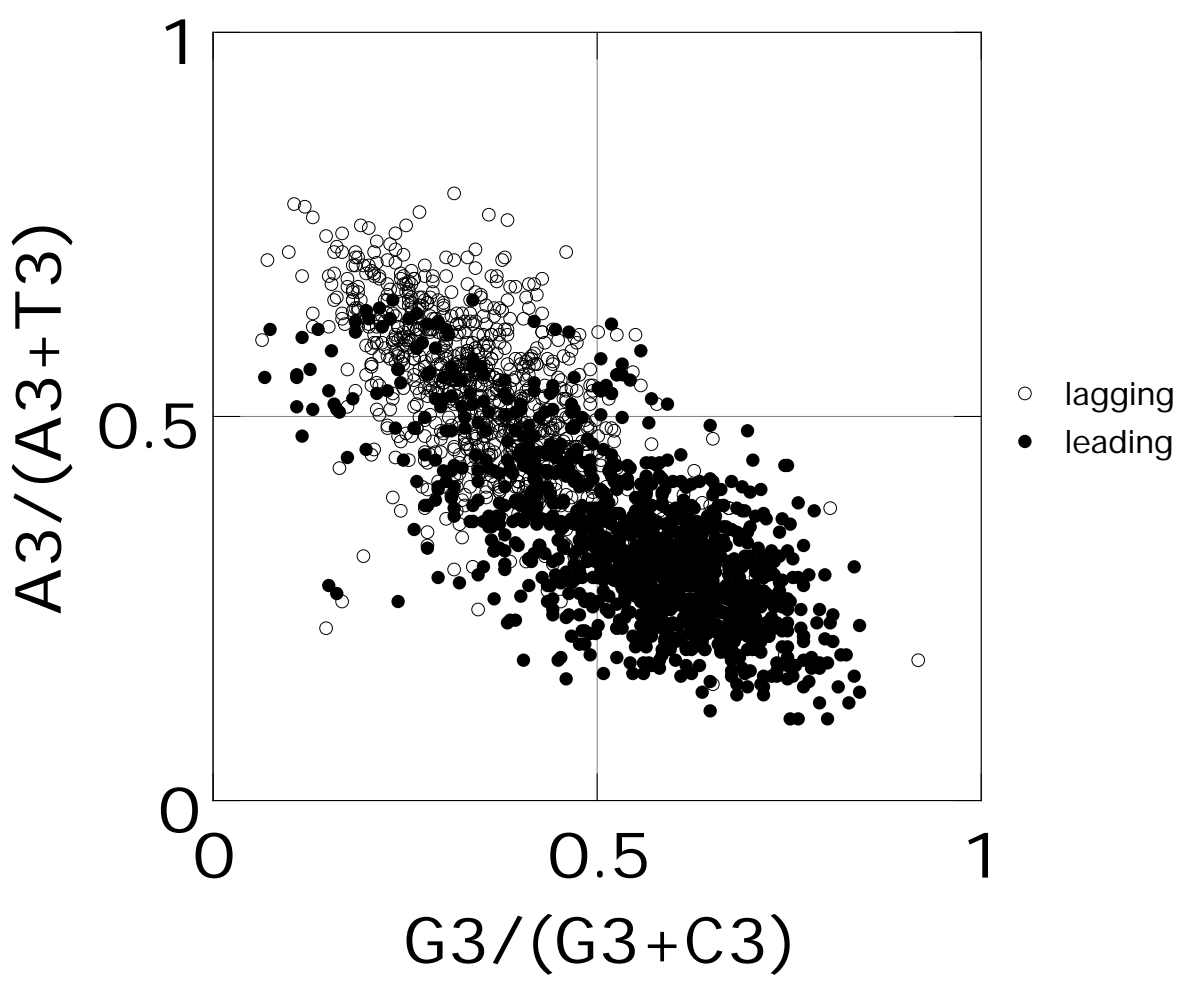

*Xylella fastidiosa*

| Chromosome. | Published Seq |       | $GC_{IGR}$ |       |      | $G/(G+C)$ |       |      | $A (A+T)$ |       |      | Midpoint |       | Difference in PR2-bias |          |             |
|-------------|---------------|-------|------------|-------|------|-----------|-------|------|-----------|-------|------|----------|-------|------------------------|----------|-------------|
|             | #lead         | #lagg | lead       | lagg  | Sig. | $x_1$     | $x_2$ | Sig. | $y_1$     | $y_2$ | Sig. | $x_c$    | $y_c$ | $B_I$                  | $B_{II}$ | $B_I\%$     |
| B. hal      | 912           | 1013  | 0.385      | 0.382 | ns   | 0.559     | 0.450 | ***  | 0.516     | 0.491 | ***  | 0.505    | 0.504 | 0.112                  | 0.006    | <b>95.1</b> |
| B. sub      | 829           | 934   | 0.365      | 0.362 | ns   | 0.545     | 0.454 | ***  | 0.511     | 0.489 | ***  | 0.500    | 0.500 | 0.094                  | 0.000    | <b>99.6</b> |
| B. bur      | 85            | 76    | 0.213      | 0.210 | ns   | 0.616     | 0.400 | ***  | 0.425     | 0.573 | ***  | 0.508    | 0.499 | 0.261                  | 0.008    | <b>97.0</b> |
| Buch        | 118           | 123   | 0.159      | 0.152 | ns   | 0.541     | 0.488 | ***  | 0.482     | 0.530 | ***  | 0.514    | 0.506 | 0.072                  | 0.016    | <b>82.0</b> |
| C. cre      | 630           | 753   | 0.623      | 0.626 | ns   | 0.514     | 0.491 | ***  | 0.484     | 0.513 | ***  | 0.502    | 0.498 | 0.037                  | 0.003    | <b>92.7</b> |
| C. jej      | 150           | 118   | 0.200      | 0.211 | ns   | 0.535     | 0.477 | ***  | 0.488     | 0.514 | ***  | 0.506    | 0.501 | 0.064                  | 0.006    | <b>91.3</b> |
| C. mur      | 166           | 190   | 0.359      | 0.362 | ns   | 0.579     | 0.435 | ***  | 0.490     | 0.513 | ***  | 0.507    | 0.502 | 0.146                  | 0.007    | <b>95.3</b> |
| C. pne      | 191           | 236   | 0.326      | 0.320 | ns   | 0.541     | 0.451 | ***  | 0.477     | 0.521 | ***  | 0.496    | 0.499 | 0.101                  | 0.004    | <b>96.0</b> |
| C. pneAR39  | 256           | 198   | 0.337      | 0.344 | ns   | 0.548     | 0.459 | ***  | 0.474     | 0.523 | ***  | 0.504    | 0.498 | 0.102                  | 0.004    | <b>96.4</b> |
| C. pneJ138  | 190           | 240   | 0.329      | 0.318 | *    | 0.540     | 0.451 | ***  | 0.476     | 0.522 | ***  | 0.496    | 0.499 | 0.100                  | 0.005    | <b>95.6</b> |
| C. tra      | 170           | 176   | 0.359      | 0.361 | ns   | 0.578     | 0.430 | ***  | 0.497     | 0.519 | **   | 0.504    | 0.508 | 0.150                  | 0.009    | <b>94.6</b> |



|           |      |      |       |       |     |       |       |     |       |       |     |       |       |       |       |             |
|-----------|------|------|-------|-------|-----|-------|-------|-----|-------|-------|-----|-------|-------|-------|-------|-------------|
| D. rad1   | 417  | 439  | 0.609 | 0.636 | *** | 0.505 | 0.496 | *   | 0.495 | 0.512 | **  | 0.500 | 0.504 | 0.019 | 0.004 | 84.5        |
| D. rad2   | 47   | 50   | 0.579 | 0.606 | ns  | 0.491 | 0.483 | ns  | 0.490 | 0.538 | **  | 0.487 | 0.514 | 0.049 | 0.019 | 71.8        |
| E. col    | 912  | 863  | 0.428 | 0.423 | ns  | 0.522 | 0.479 | *** | 0.497 | 0.506 | **  | 0.501 | 0.502 | 0.044 | 0.002 | <b>96.4</b> |
| E.colEDL  | 1153 | 1077 | 0.429 | 0.421 | **  | 0.523 | 0.478 | *** | 0.495 | 0.507 | *** | 0.500 | 0.501 | 0.047 | 0.001 | <b>97.7</b> |
| E.colRIMD | 1088 | 1000 | .425  | .422  | ns  | 0.523 | 0.479 | *** | 0.494 | 0.507 | *** | 0.501 | 0.500 | 0.046 | 0.001 | <b>97.6</b> |
| H. inf    | 351  | 347  | 0.313 | 0.310 | ns  | 0.525 | 0.475 | *** | 0.494 | 0.510 | *** | 0.500 | 0.502 | 0.052 | 0.002 | <b>96.6</b> |
| H. pyl    | 221  | 250  | 0.303 | 0.301 | ns  | 0.516 | 0.474 | *** | 0.500 | 0.494 | ns  | 0.495 | 0.497 | 0.042 | 0.006 | 87.6        |
| H. pylJ99 | 204  | 240  | 0.304 | 0.311 | ns  | 0.524 | 0.475 | *** | 0.497 | 0.502 | ns  | 0.500 | 0.500 | 0.049 | 0.000 | 99.1        |
| L.lac     | 606  | 507  | 0.277 | 0.274 | ns  | 0.566 | 0.426 | *** | 0.526 | 0.465 | *** | 0.496 | 0.496 | 0.153 | 0.006 | <b>96.2</b> |
| M.lep     | 703  | 717  | 0.546 | 0.546 | ns  | 0.536 | 0.470 | *** | 0.459 | 0.536 | *** | 0.503 | 0.498 | 0.101 | 0.004 | <b>96.3</b> |
| M. tub    | 656  | 649  | 0.623 | 0.627 | ns  | 0.515 | 0.482 | *** | 0.489 | 0.516 | *** | 0.498 | 0.503 | 0.043 | 0.003 | <b>93.4</b> |
| M.tubCDC  | 593  | 628  | 0.628 | 0.626 | ns  | 0.516 | 0.484 | *** | 0.486 | 0.515 | *** | 0.500 | 0.500 | 0.043 | 0.000 | <b>98.9</b> |
| M. gen    | 33   | 48   | 0.305 | 0.249 | *** | 0.490 | 0.490 | ns  | 0.523 | 0.507 | ns  | 0.490 | 0.515 | 0.016 | 0.018 | 45.9        |
| M. pne    | 104  | 131  | 0.342 | 0.336 | ns  | 0.495 | 0.494 | ns  | 0.501 | 0.502 | ns  | 0.494 | 0.501 | 0.002 | 0.006 | 23.7        |
| M.pul     | 161  | 110  | 0.184 | 0.178 | ns  | 0.504 | 0.482 | *   | 0.506 | 0.498 | ns  | 0.493 | 0.502 | 0.023 | 0.007 | 76.3        |

|           |     |      |       |       |    |       |       |     |       |       |     |       |       |       |       |             |
|-----------|-----|------|-------|-------|----|-------|-------|-----|-------|-------|-----|-------|-------|-------|-------|-------------|
| N. menA   | 605 | 385  | 0.447 | 0.439 | ns | 0.524 | 0.462 | *** | 0.488 | 0.506 | *** | 0.493 | 0.497 | 0.065 | 0.008 | <b>89.4</b> |
| N. menB   | 552 | 459  | 0.448 | 0.459 | ns | 0.538 | 0.468 | *** | 0.491 | 0.515 | *** | 0.503 | 0.503 | 0.074 | 0.004 | <b>94.6</b> |
| P.mul     | 415 | 304  | 0.332 | 0.323 | *  | 0.541 | 0.465 | *** | 0.492 | 0.513 | *** | 0.503 | 0.502 | 0.079 | 0.004 | <b>95.3</b> |
| P. aer    | 871 | 1344 | 0.620 | 0.614 | ns | 0.526 | 0.476 | *** | 0.476 | 0.529 | *** | 0.501 | 0.502 | 0.073 | 0.003 | <b>96.4</b> |
| P. aby    | 175 | 202  | 0.386 | 0.373 | ns | 0.508 | 0.495 | ns  | 0.489 | 0.504 | *   | 0.501 | 0.496 | 0.020 | 0.004 | 83.4        |
| P. hor    | 141 | 308  | 0.381 | 0.373 | ns | 0.526 | 0.482 | *** | 0.496 | 0.507 | ns  | 0.504 | 0.501 | 0.046 | 0.004 | 91.7        |
| R. pro    | 267 | 213  | 0.237 | 0.248 | ** | 0.535 | 0.465 | *** | 0.485 | 0.518 | *** | 0.500 | 0.501 | 0.077 | 0.001 | <b>98.1</b> |
| S.aur     | 655 | 735  | 0.278 | 0.276 | ns | 0.570 | 0.435 | *** | 0.514 | 0.487 | *** | 0.502 | 0.500 | 0.138 | 0.003 | <b>98.2</b> |
| S.aurN315 | 683 | 702  | 0.273 | 0.275 | ns | 0.573 | 0.426 | *** | 0.515 | 0.485 | *** | 0.499 | 0.500 | 0.150 | 0.001 | <b>99.7</b> |
| S.pyo     | 408 | 381  | 0.328 | 0.322 | ns | 0.567 | 0.440 | *** | 0.517 | 0.486 | *** | .503  | .502  | .131  | .004  | <b>97.2</b> |
| T. aci    | 301 | 297  | 0.360 | 0.363 | ns | 0.512 | 0.491 | *** | 0.498 | 0.506 | **  | 0.502 | 0.502 | 0.022 | 0.003 | <b>90.0</b> |
| T. mar    | 122 | 127  | 0.400 | 0.394 | ns | 0.518 | 0.500 | ns  | 0.494 | 0.507 | ns  | 0.509 | 0.500 | 0.023 | 0.009 | 71.0        |
| T. pal    | 135 | 117  | 0.538 | 0.546 | ns | 0.583 | 0.432 | *** | 0.452 | 0.525 | *** | 0.508 | 0.489 | 0.167 | 0.014 | <b>92.4</b> |
| U. ure    | 122 | 62   | 0.178 | 0.178 | ns | 0.515 | 0.469 | **  | 0.497 | 0.504 | ns  | 0.492 | 0.500 | 0.047 | 0.008 | 85.3        |
| V. cho1   | 553 | 460  | 0.408 | 0.416 | *  | 0.529 | 0.476 | *** | 0.483 | 0.511 | *** | 0.502 | 0.497 | 0.060 | 0.004 | <b>93.9</b> |

|         |     |     |              |              |     |              |              |     |              |              |     |       |       |       |       |             |
|---------|-----|-----|--------------|--------------|-----|--------------|--------------|-----|--------------|--------------|-----|-------|-------|-------|-------|-------------|
| V. cho2 | 301 | 228 | <b>0.444</b> | <b>0.414</b> | *** | <b>0.545</b> | <b>0.466</b> | *** | <b>0.459</b> | <b>0.519</b> | *** | 0.506 | 0.489 | 0.099 | 0.012 | <b>89.0</b> |
| X. fas  | 842 | 404 | 0.467        | 0.470        | ns  | <b>0.582</b> | <b>0.441</b> | *** | <b>0.428</b> | <b>0.557</b> | *** | 0.511 | 0.493 | 0.191 | 0.014 | <b>93.3</b> |

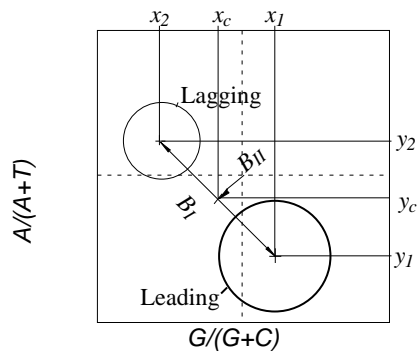

**Table 3. Base composition in intergenic spaces (>100 bp) between the leading and the lagging groups.** Indices are defined in the material and method section. #lead and #lag are the number of intergenic spaces in the leading and the lagging strand. The significance level (Sig.) for a difference between the two groups are: ns (not significant,  $p \geq 0.05$ ); \* ( $0.01 \leq p < 0.05$ ); \*\* ( $0.001 \leq p < 0.01$ ); \*\*\* ( $p < 0.001$ ). The contribution in percent of replication-associated effects to PR2 deviations ( $B_l$  %) is given in **bold** when both differences  $x_l - x_2$  and  $y_l - y_2$  are highly significant ( $p < 0.01$ ). When a difference is significant between the two groups a red color outlines the **highest** value and a blue color the lowest **value**.

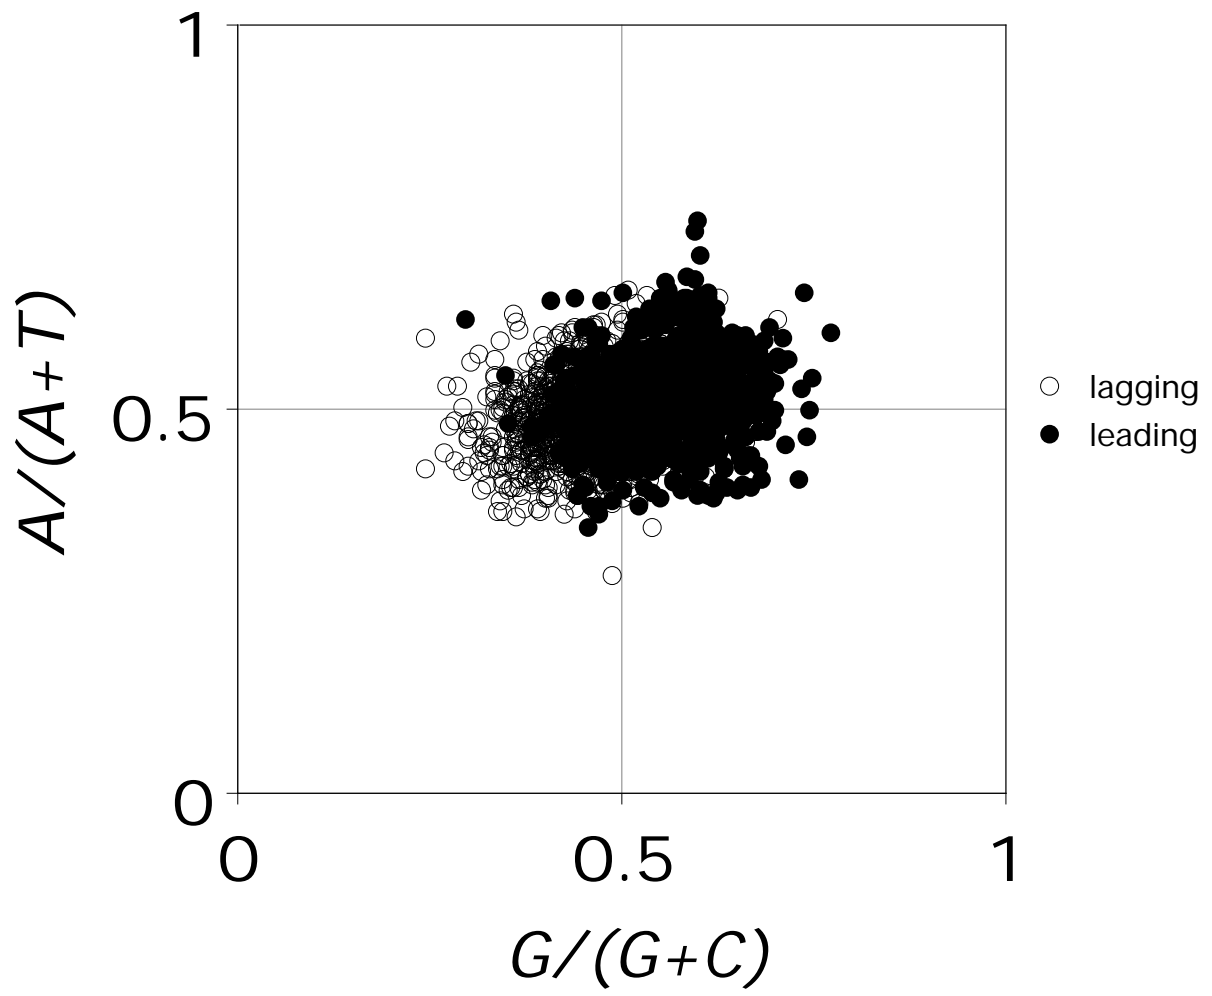

*Bacillus halodurans*

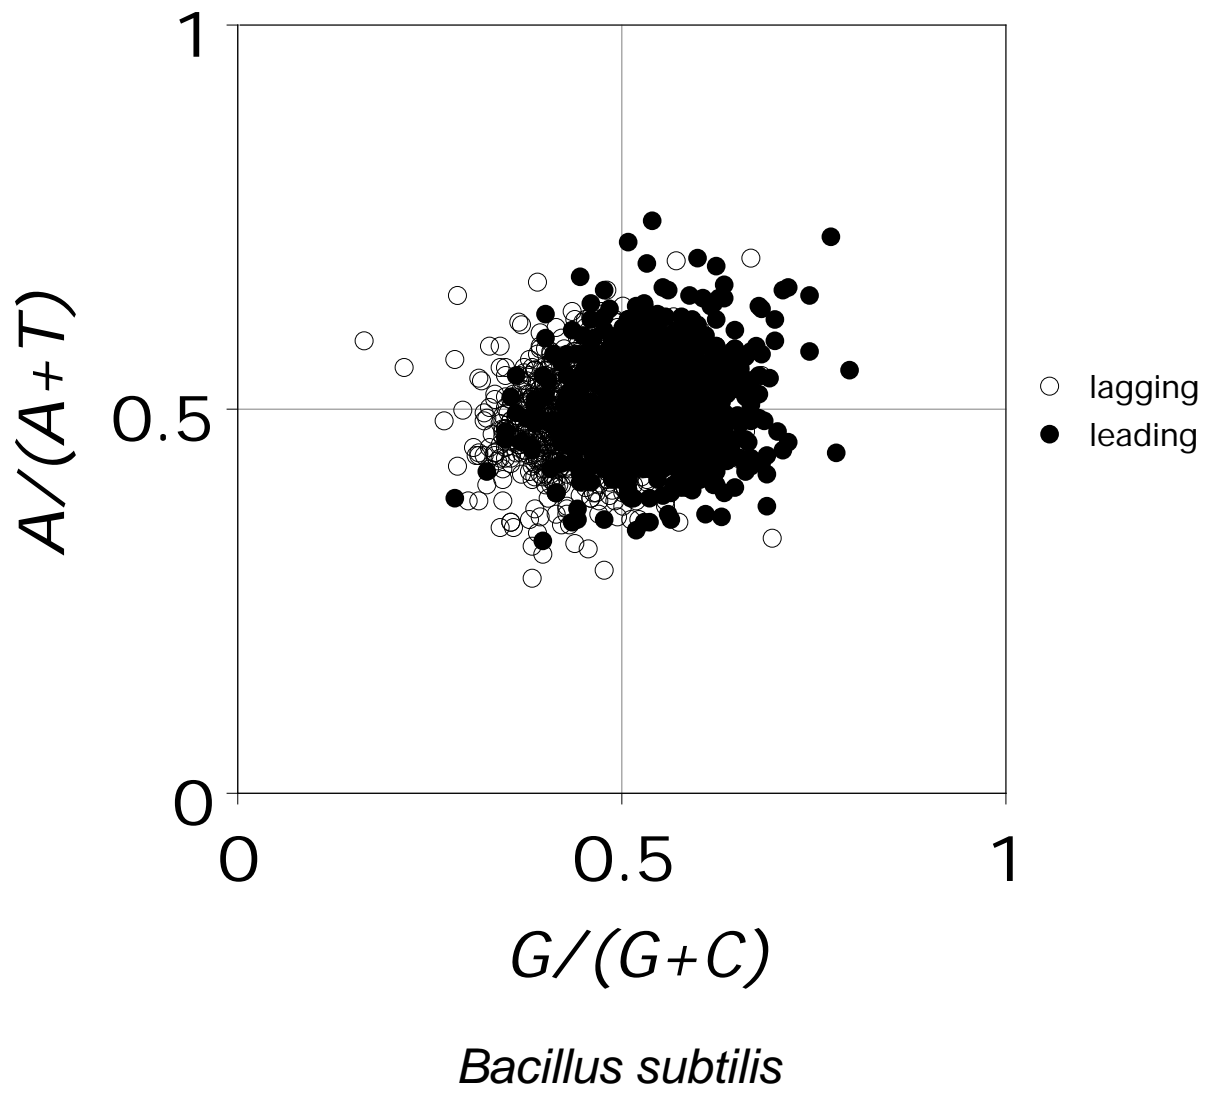

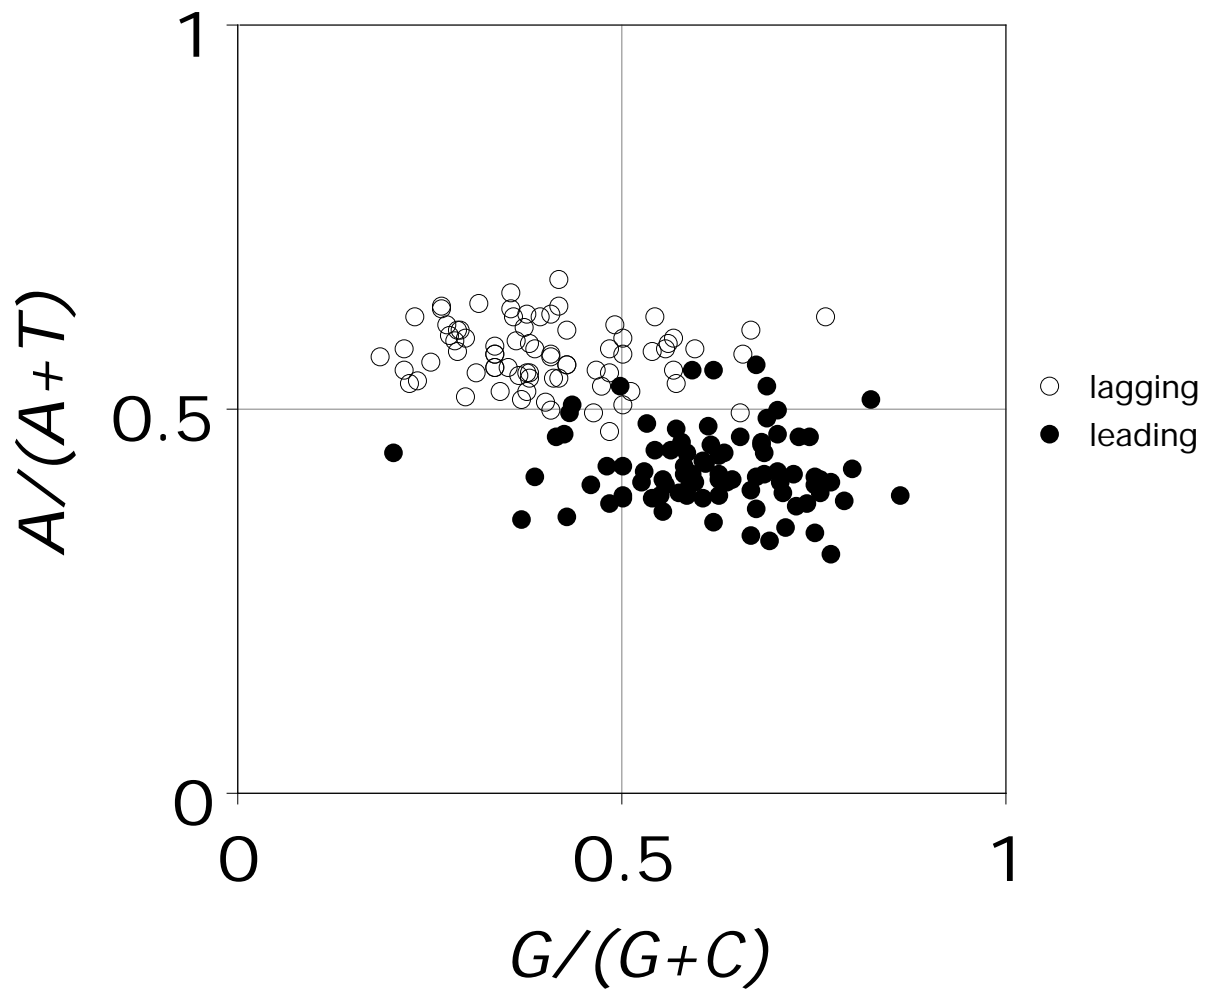

*Borrelia burgdorferi*

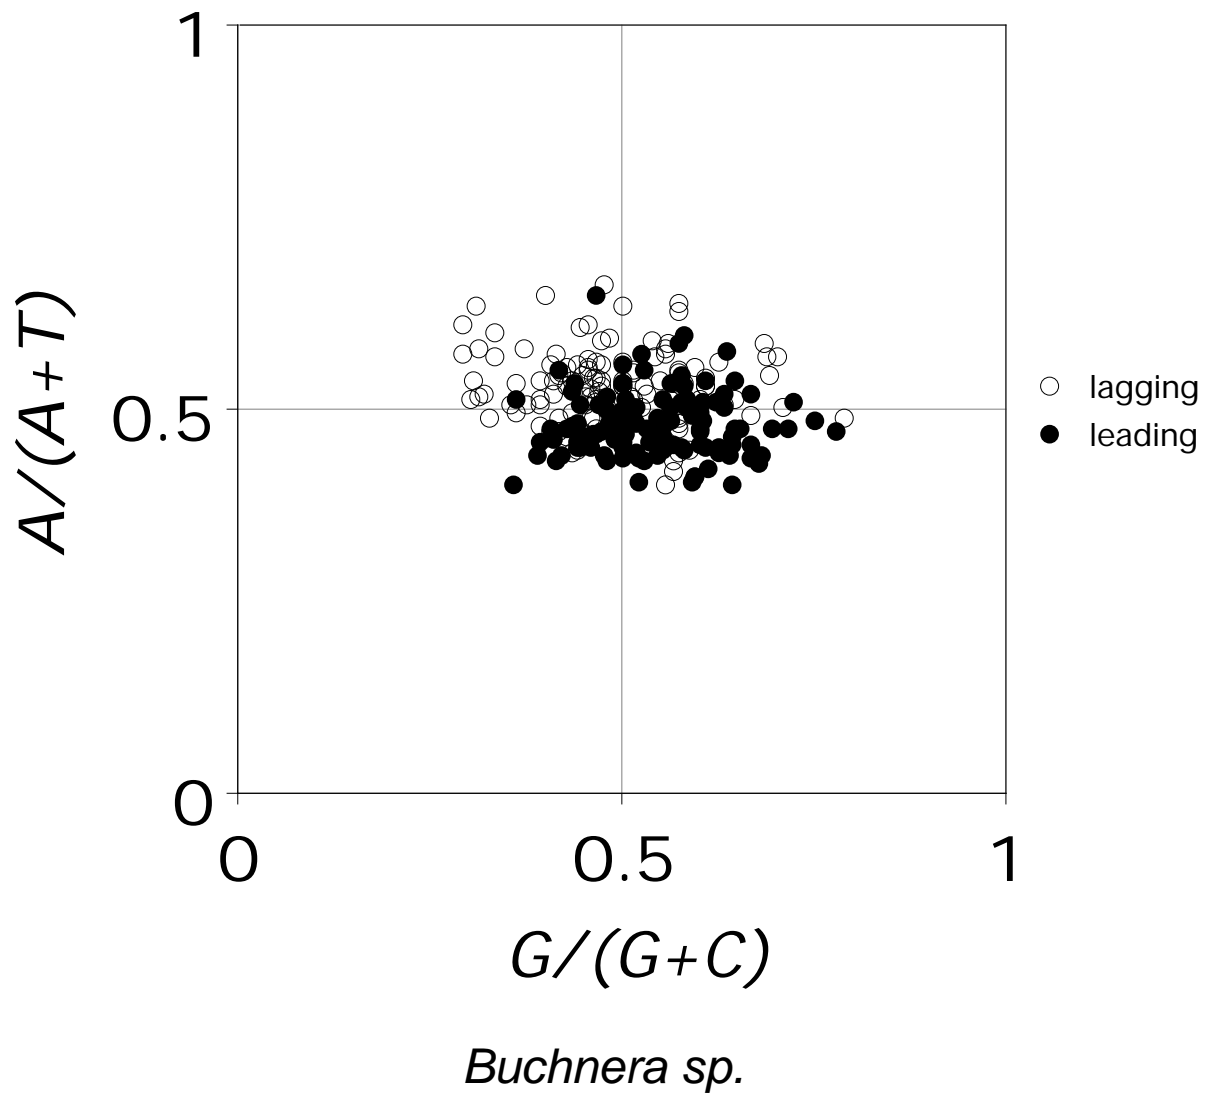

To coding sequences in Buch

To small intergenic spaces in Buch

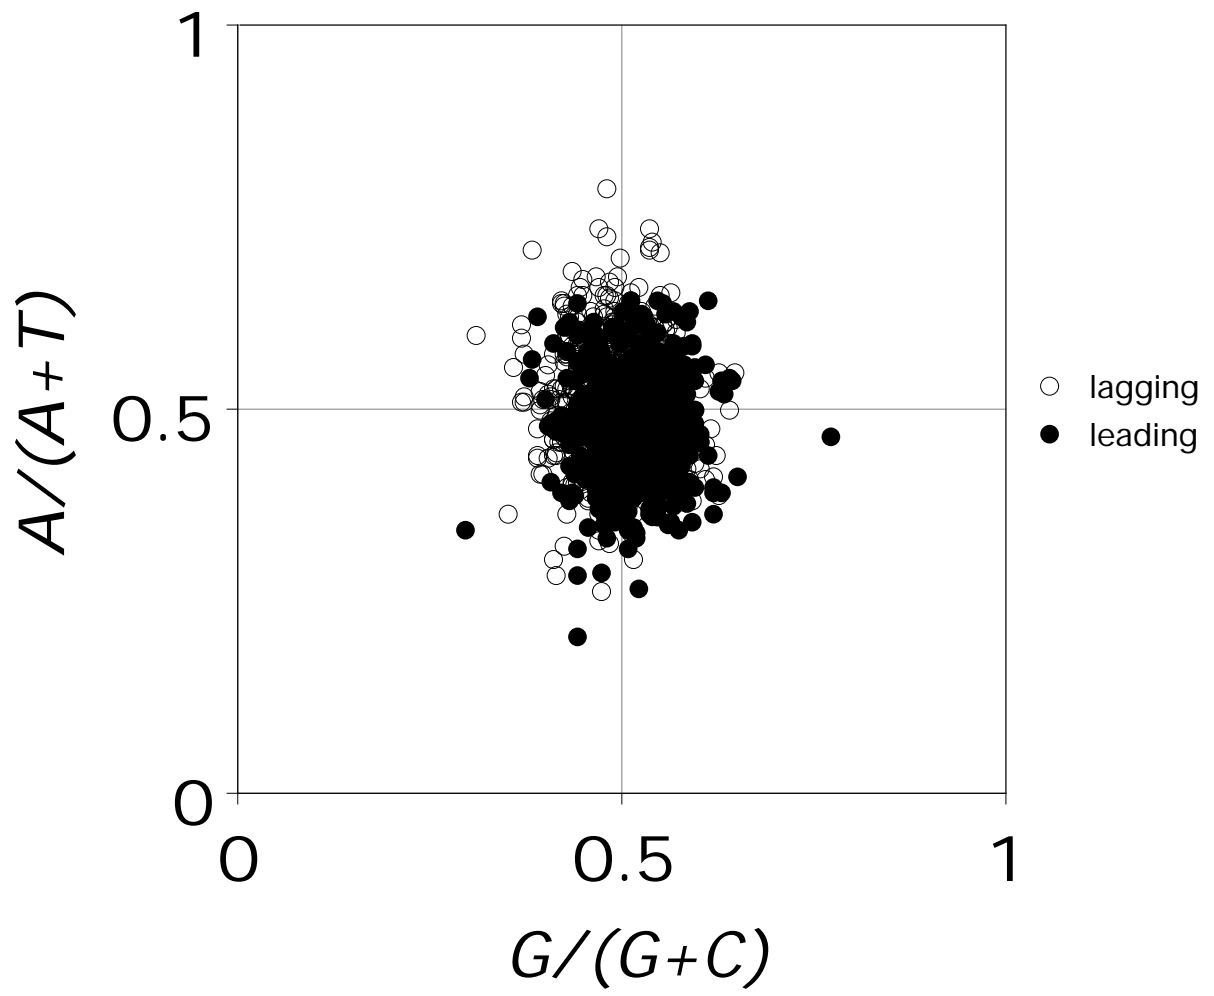

*Caulobacter crescentus*



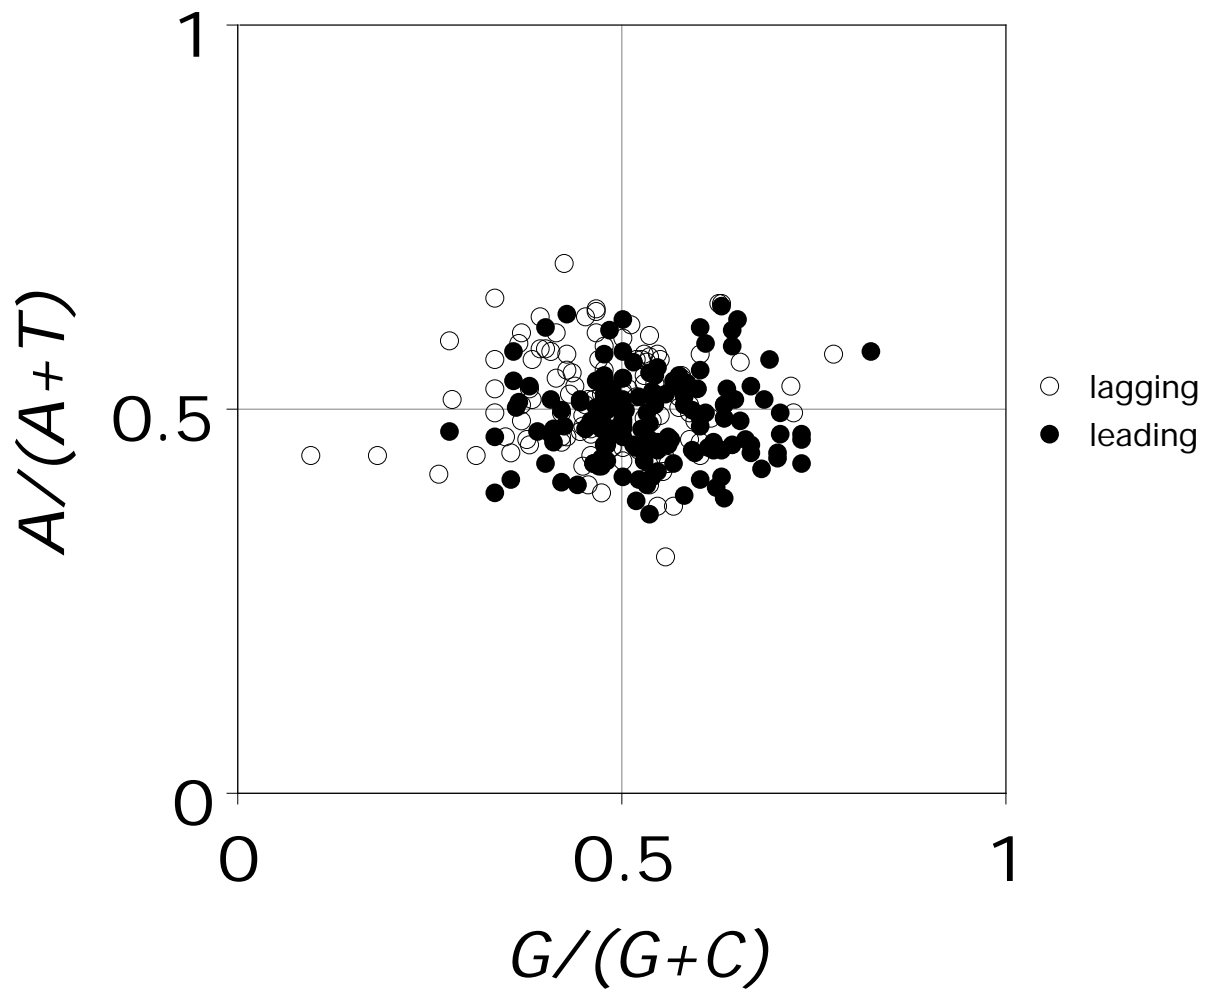

*Campylobacter jejuni*

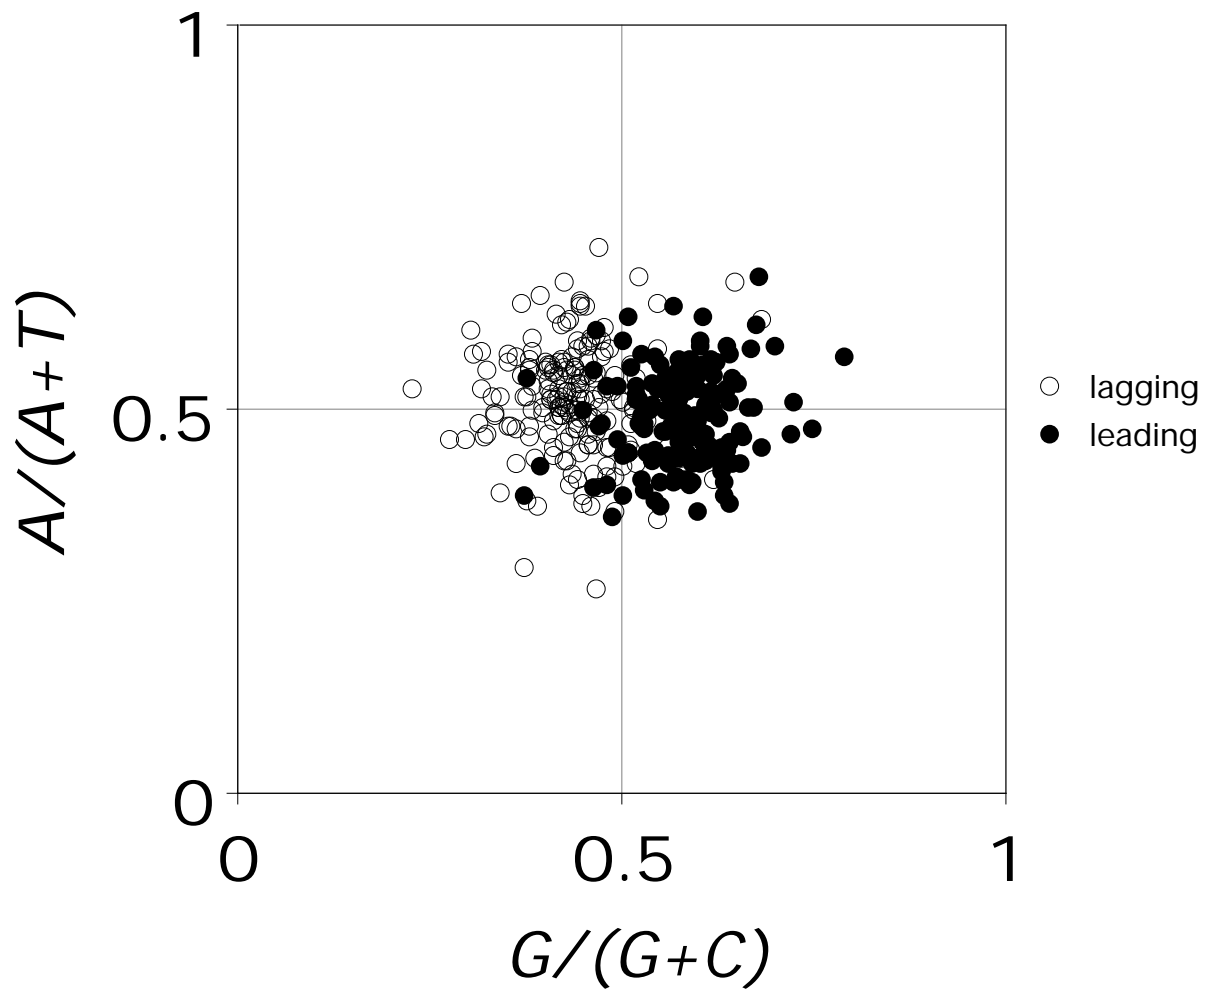

*Chlamydia muridarum*

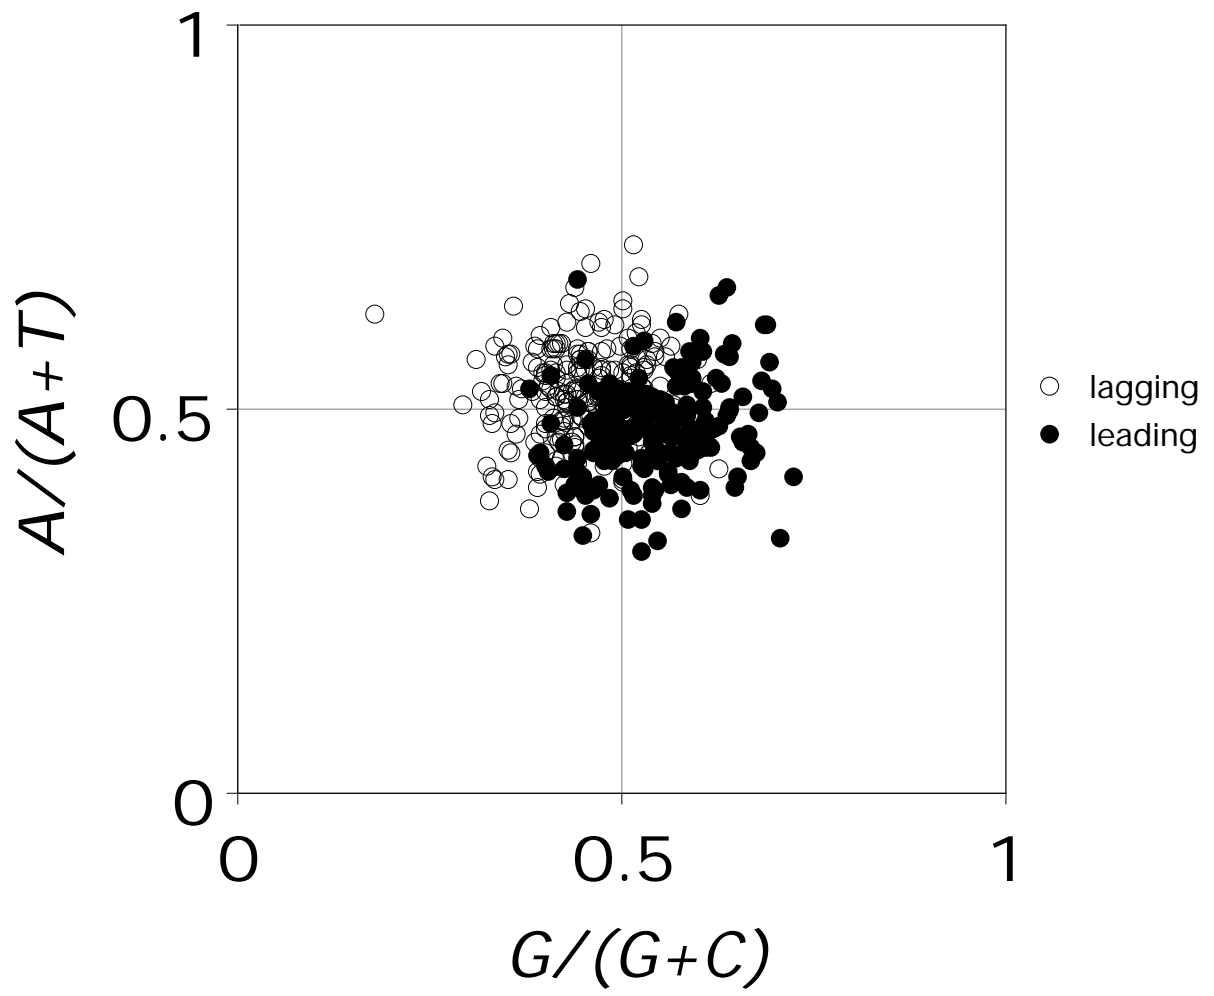

*Chlamydophila pneumoniae* CWL029

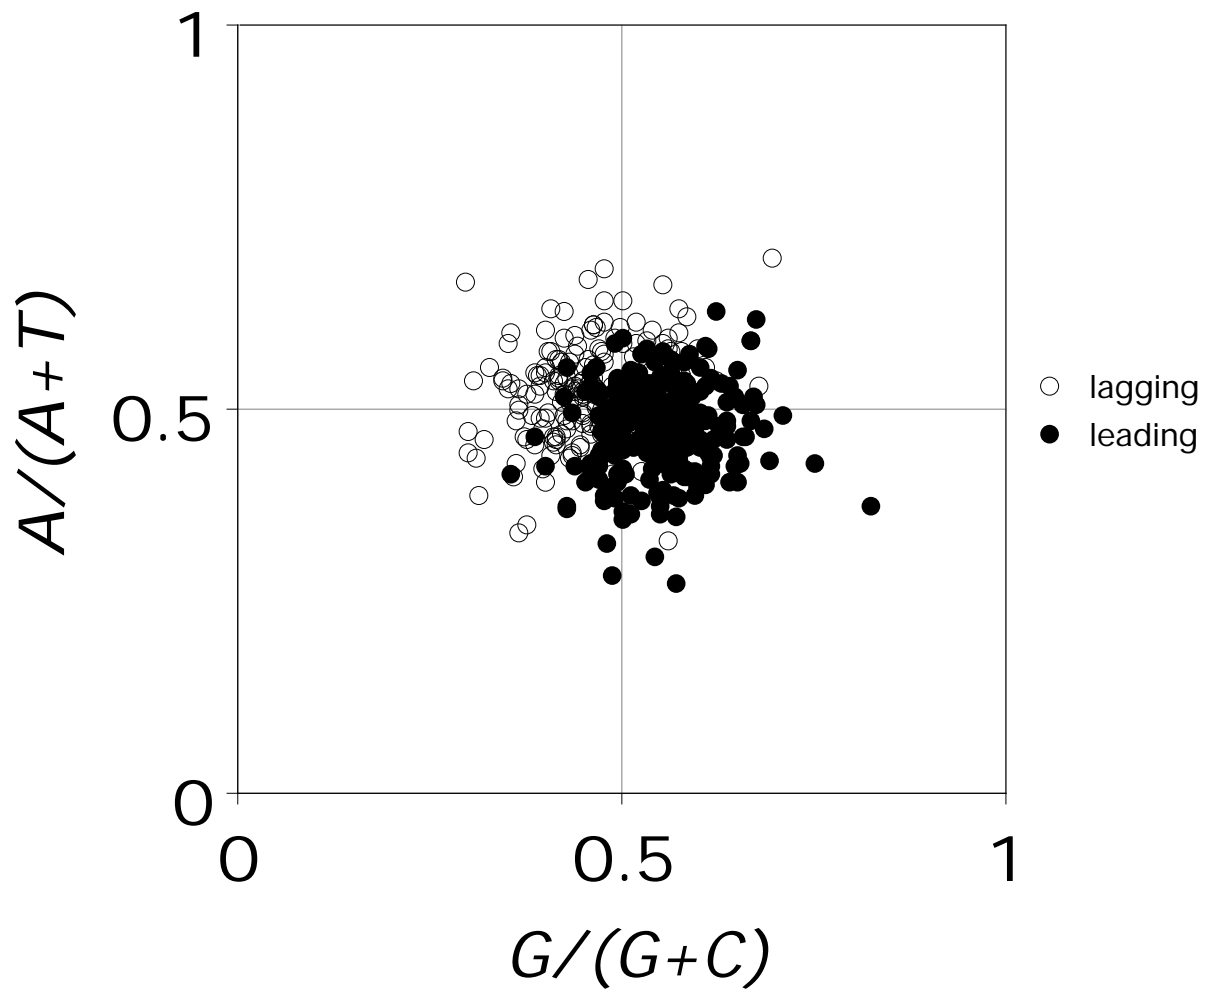

*Chlamydomonas reinhardtii* AR39

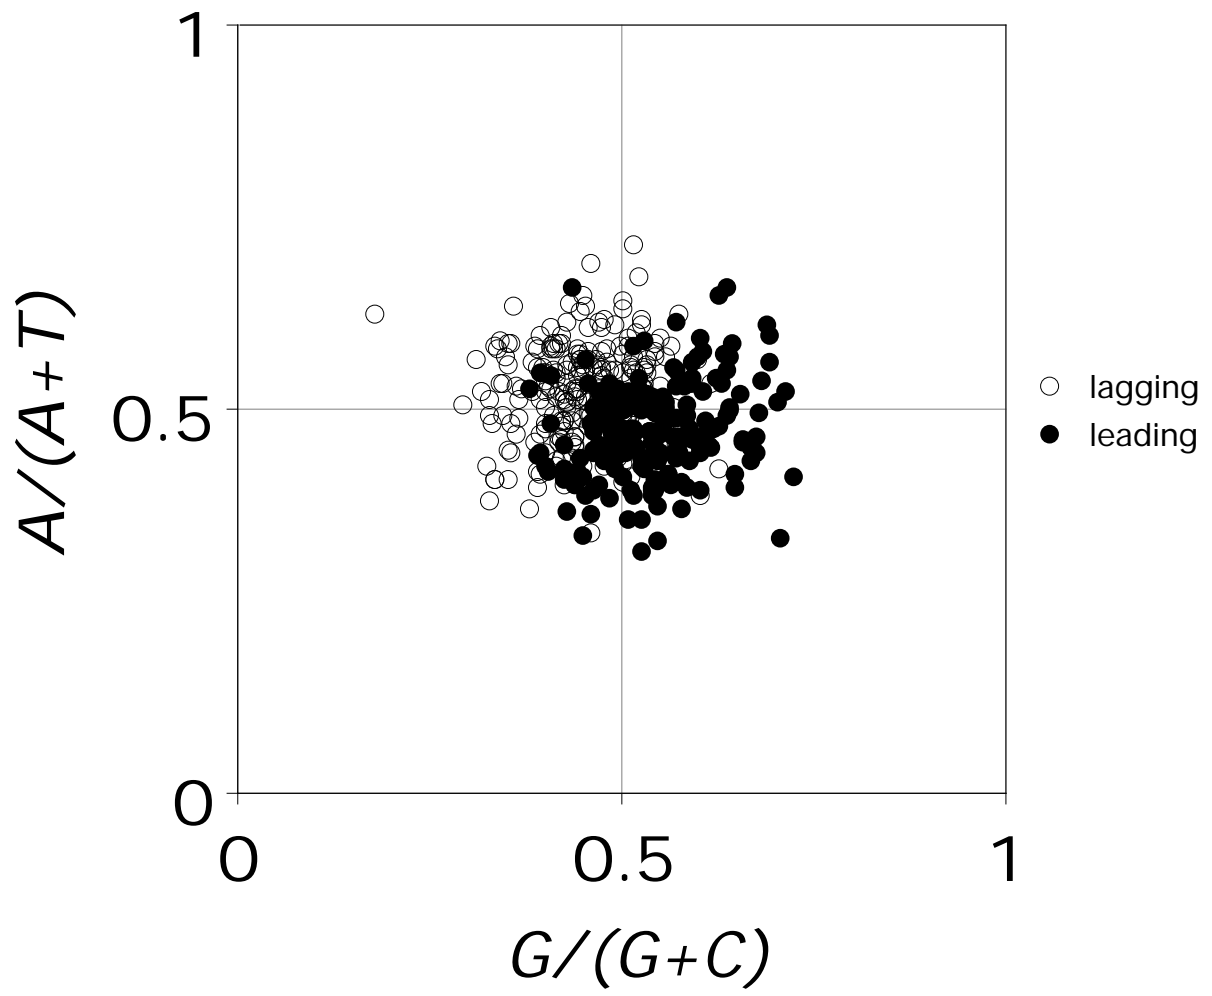

*Chlamydomonas reinhardtii* J138

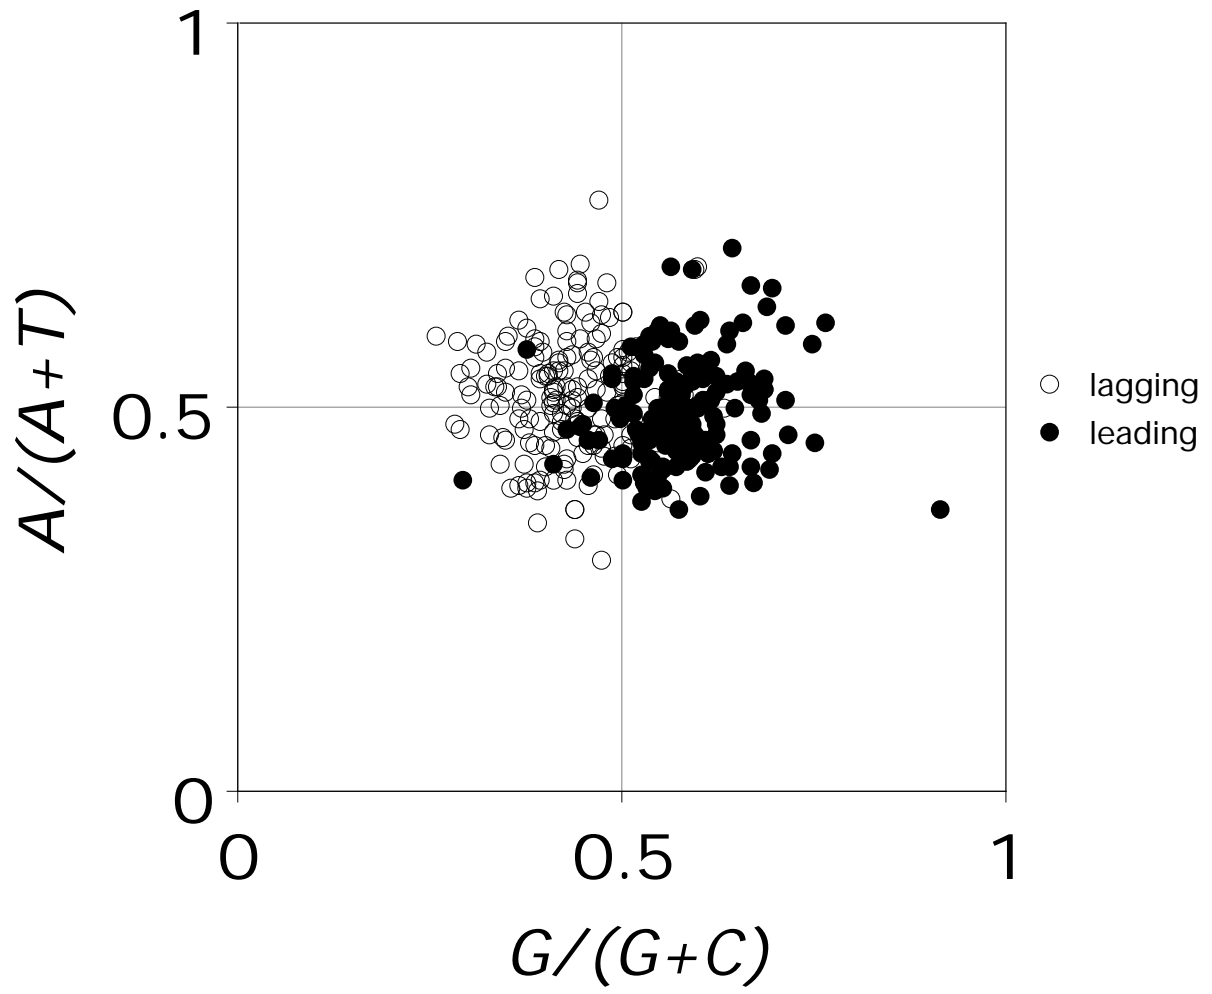

*Chlamydia trachomatis*

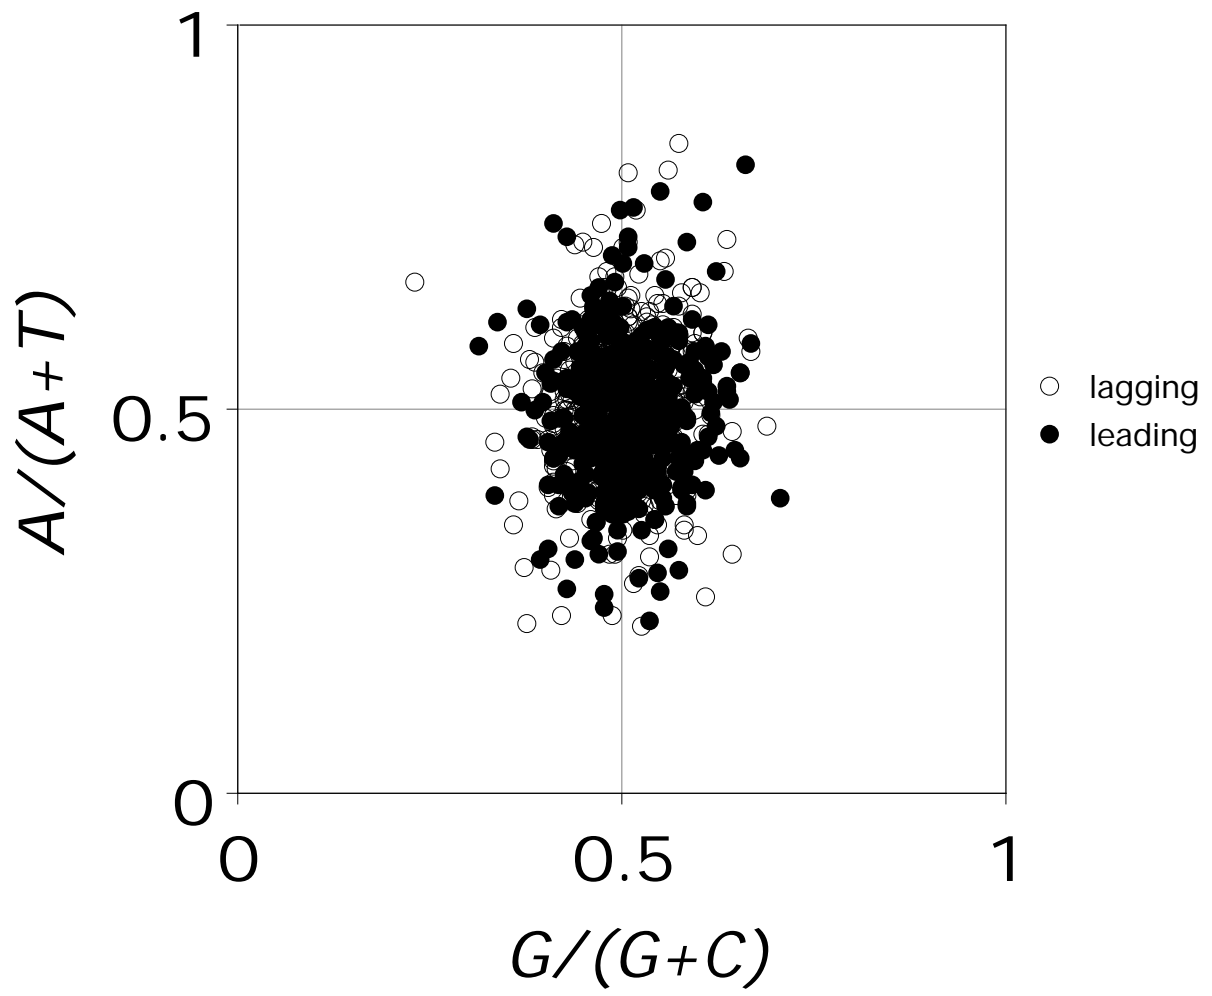

*Deinococcus radiodurans* chromosome 1

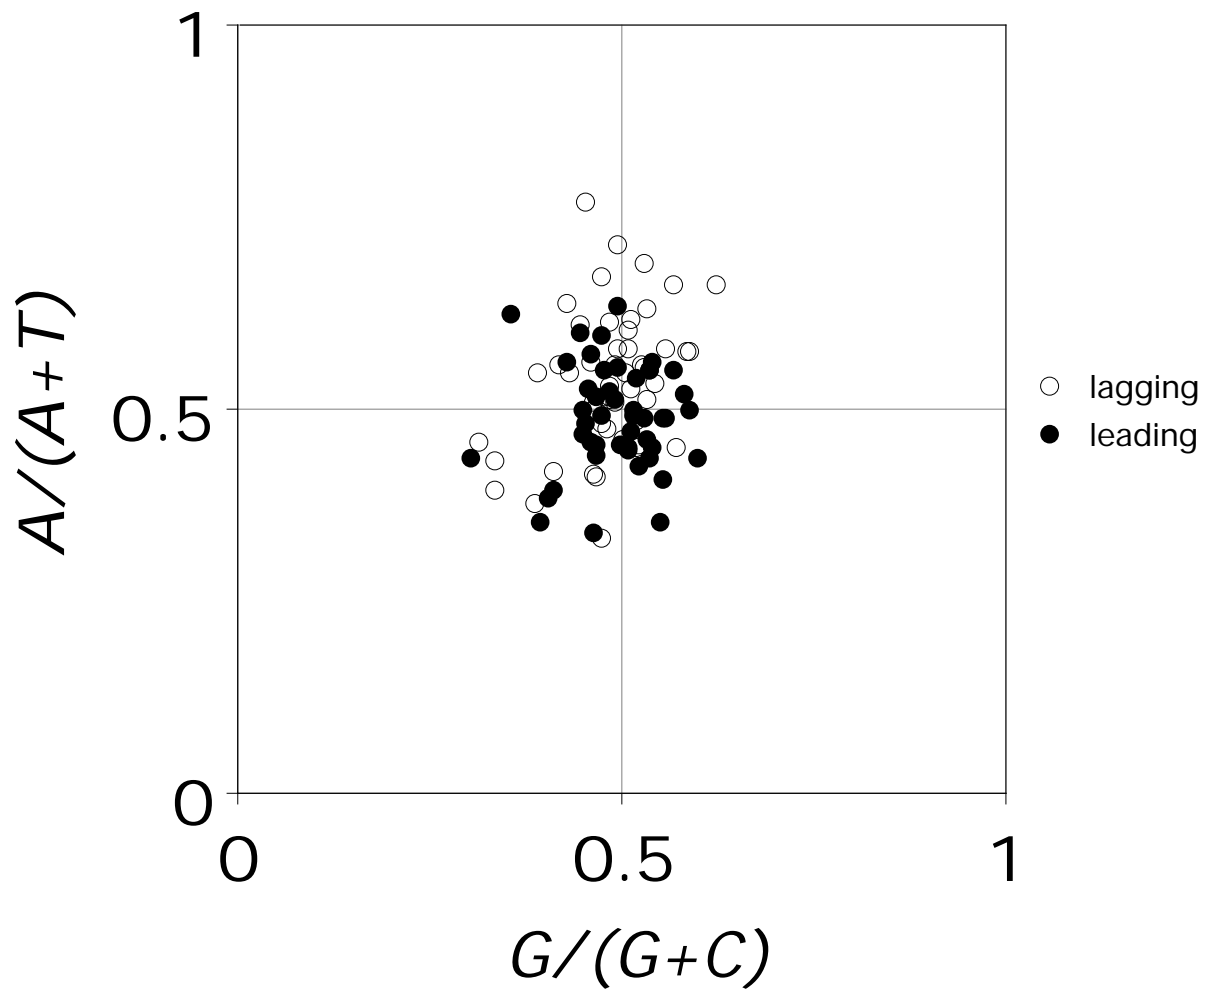

*Deinococcus radiodurans* chromosome 2



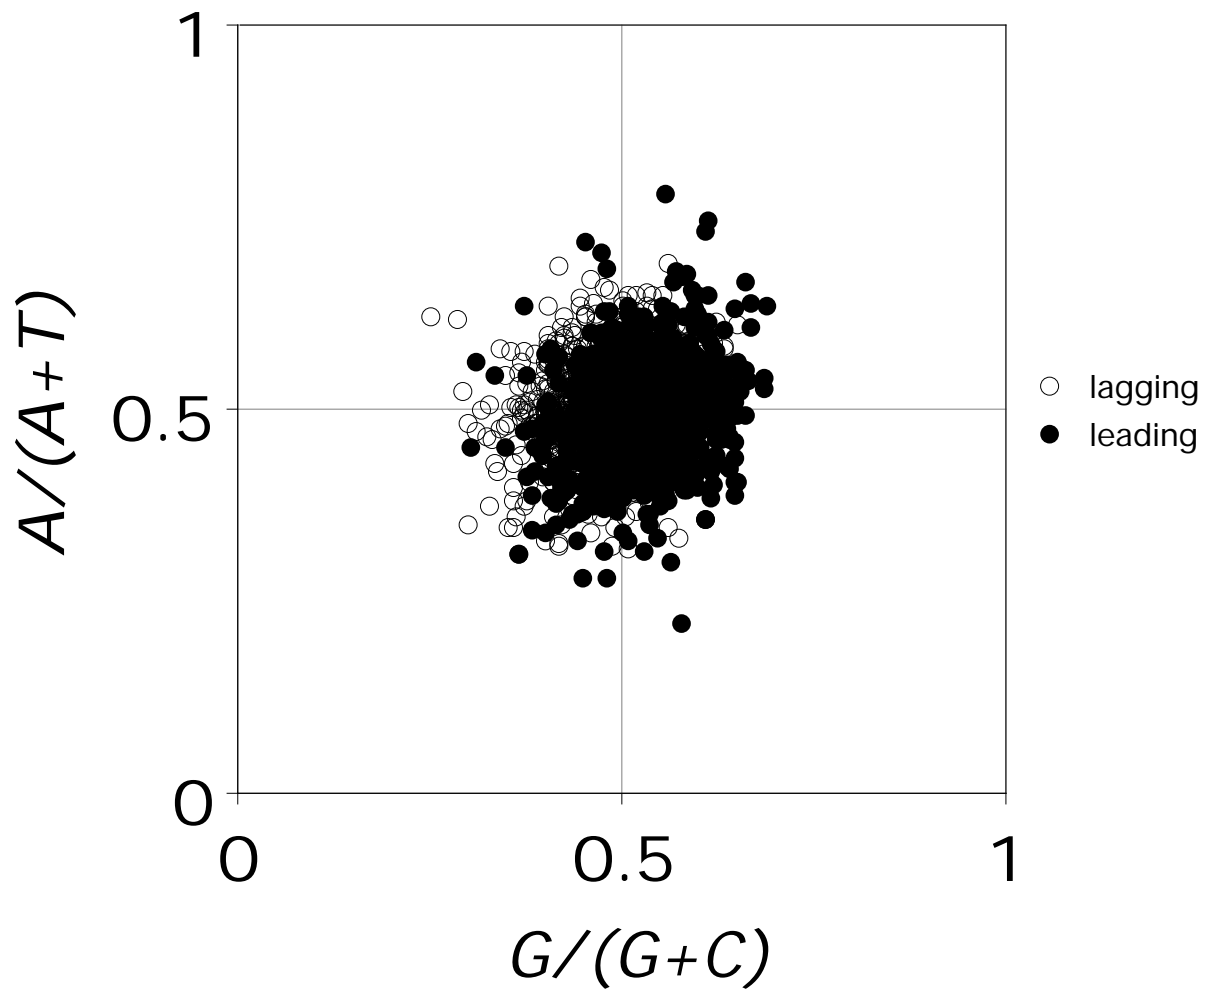

*Escherichia coli* K-12

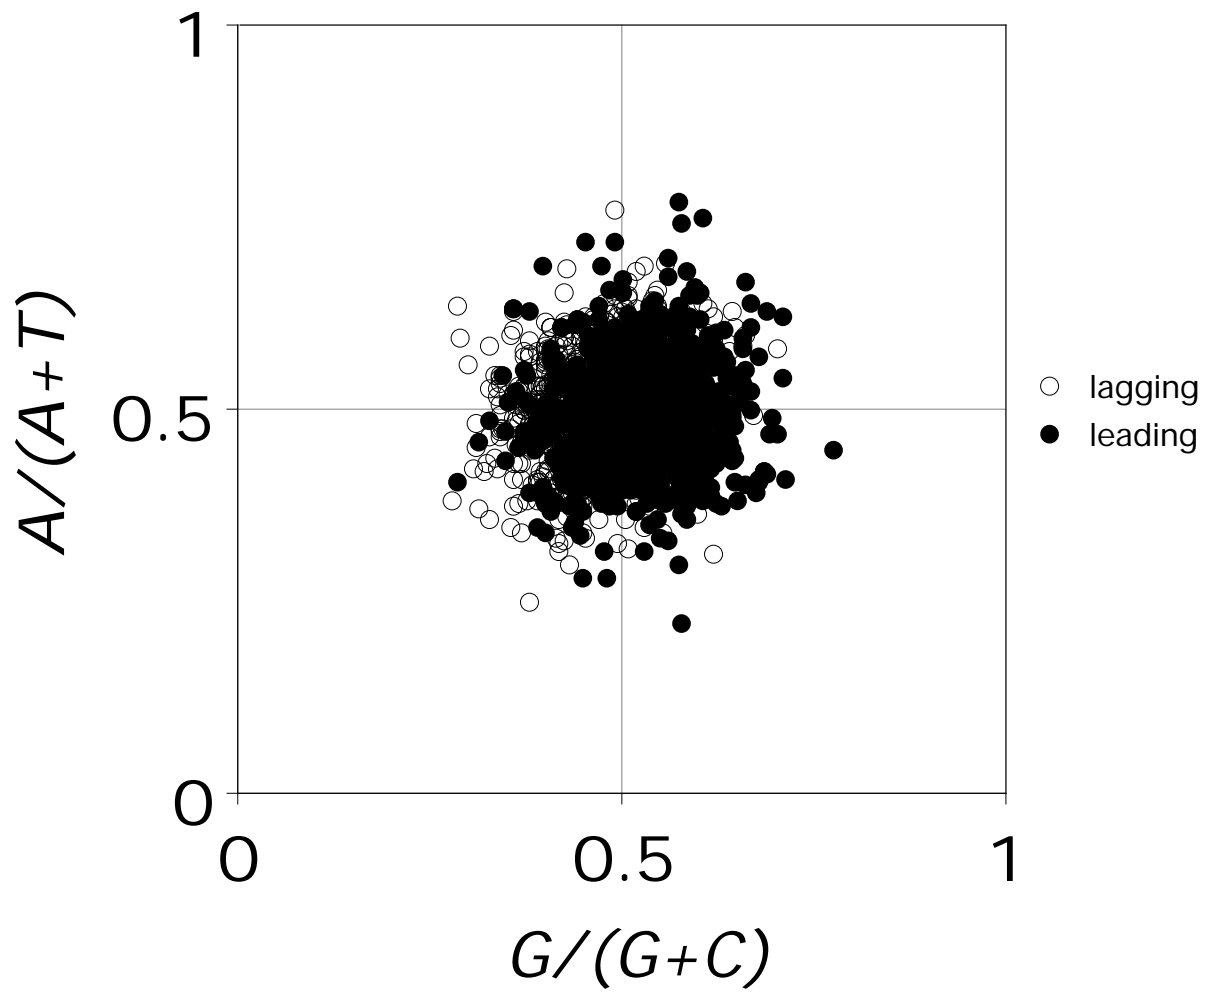

*Escherichia coli* EDL933

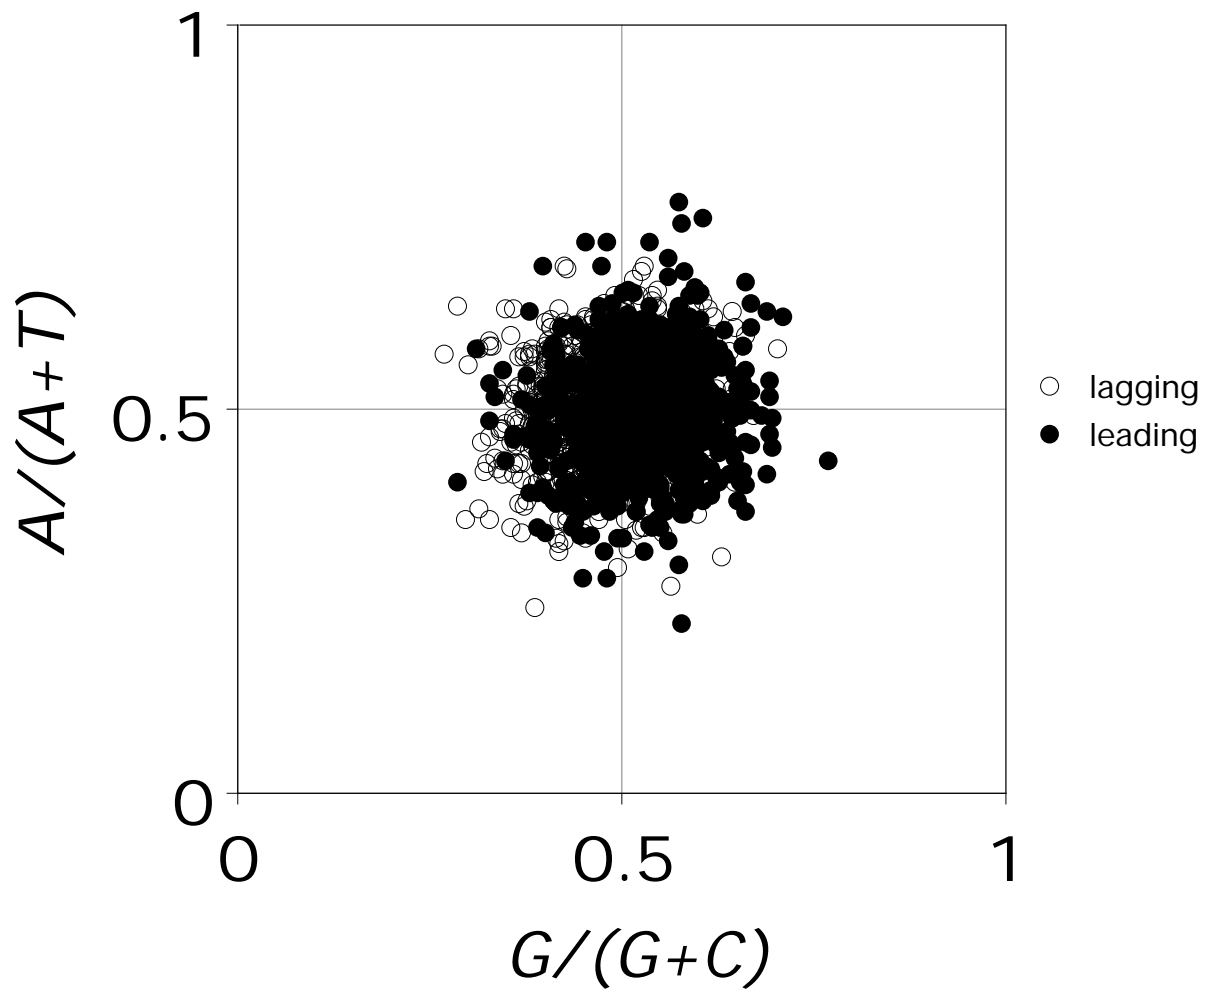

*Escherichia coli* RIMD 0509952

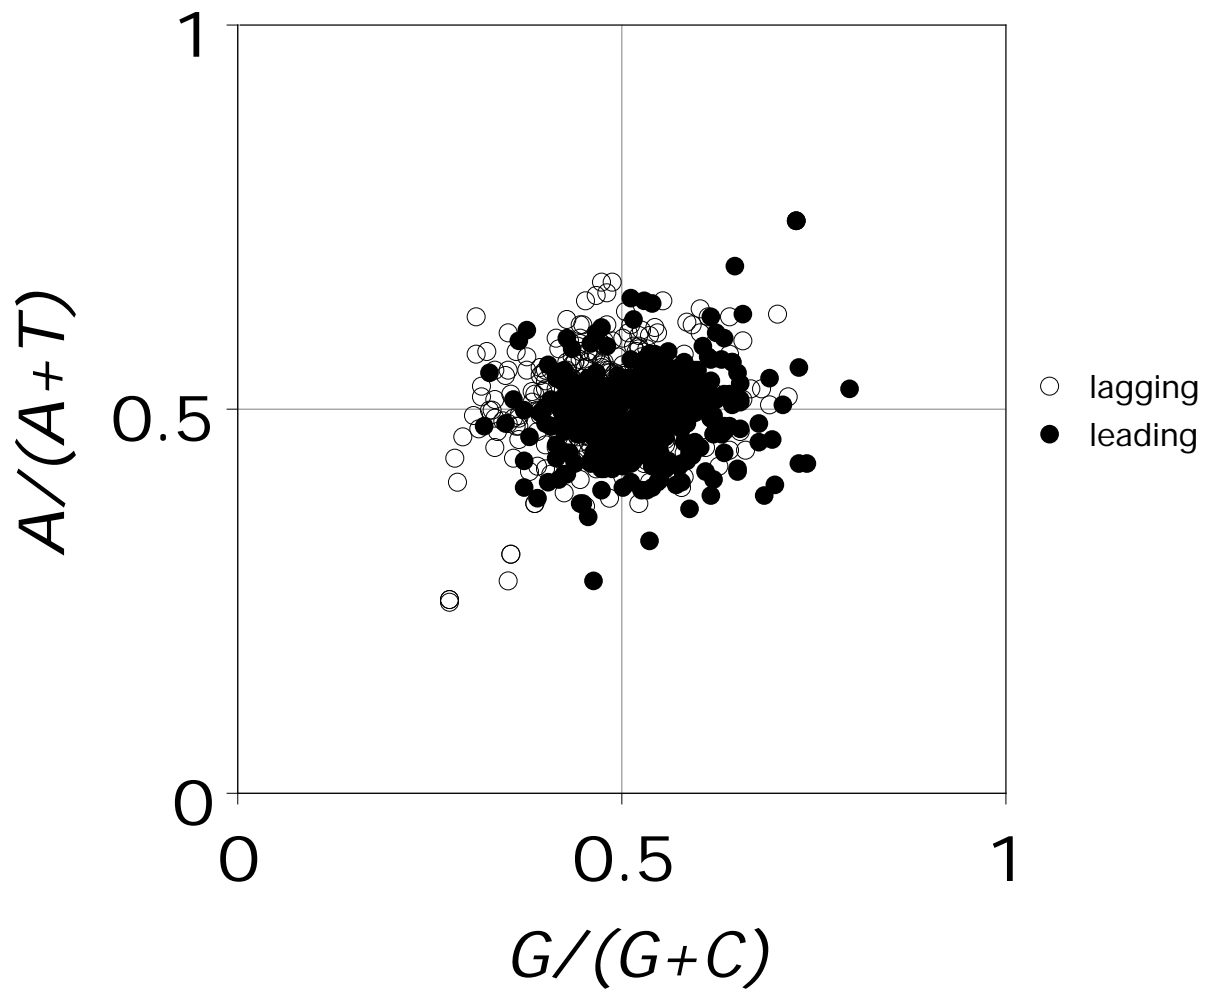

*Haemophilus influenzae*

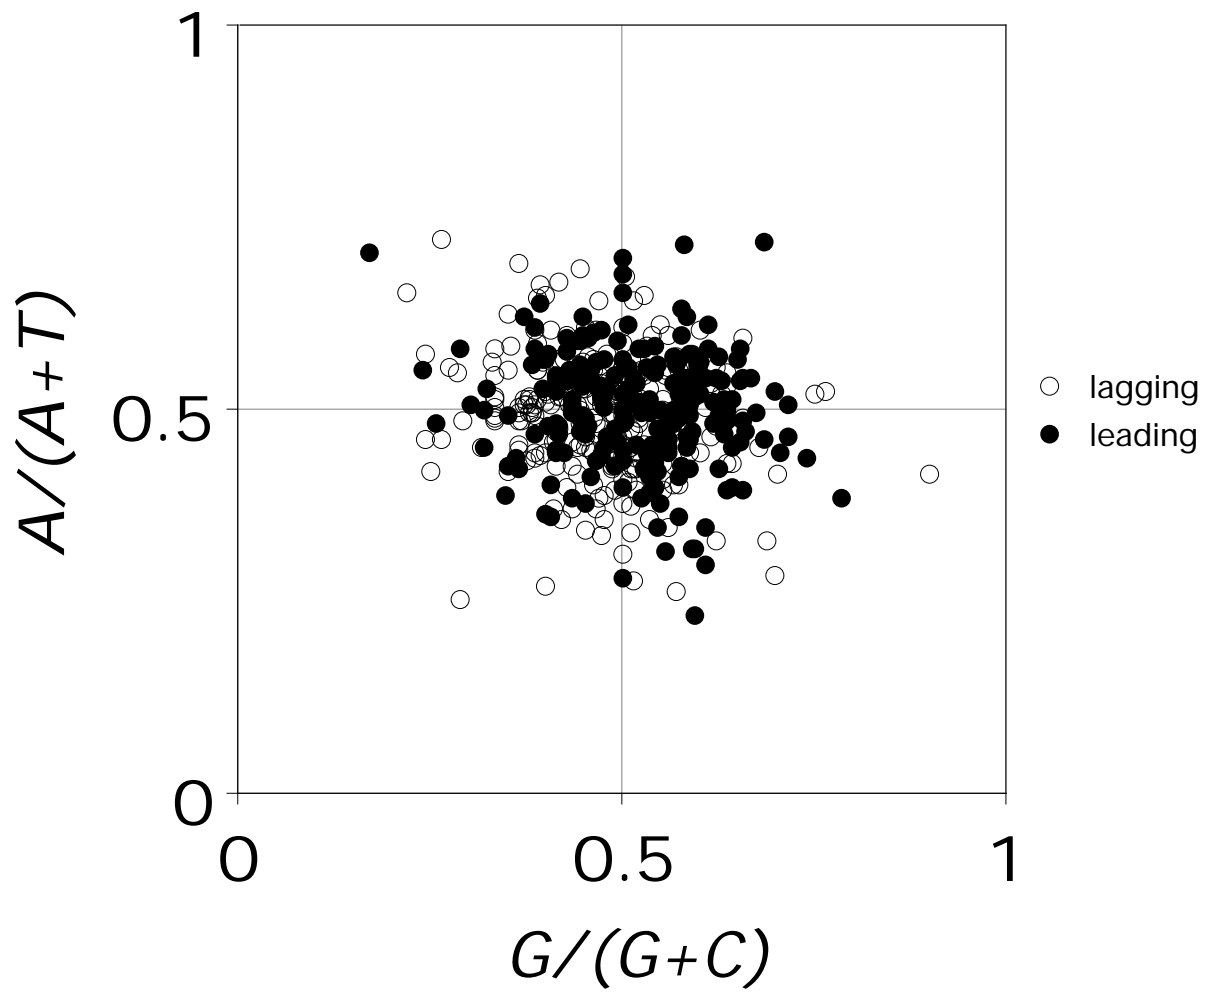

*Helicobacter pylori* 26695

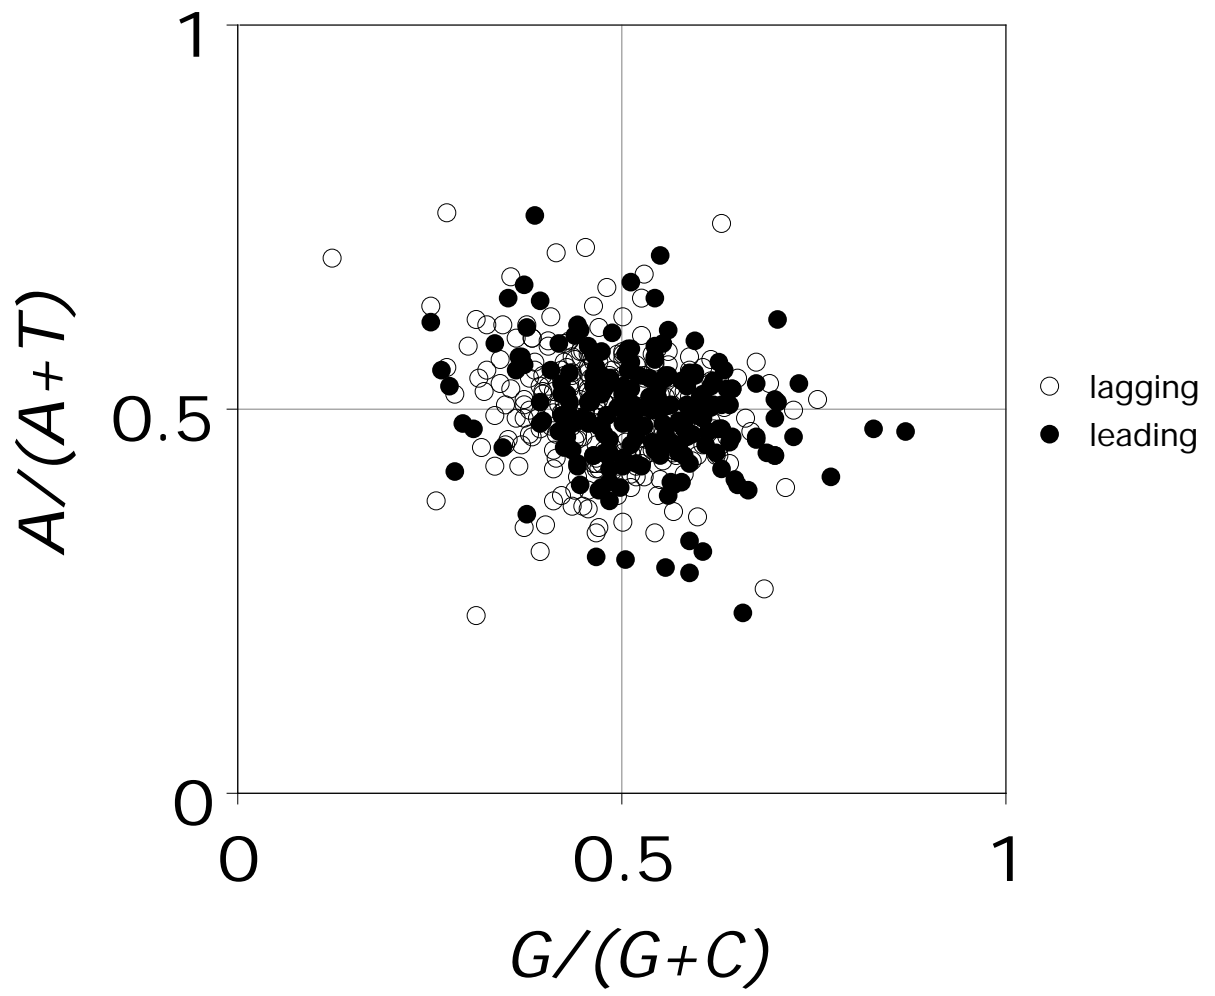

*Helicobacter pylori* J99

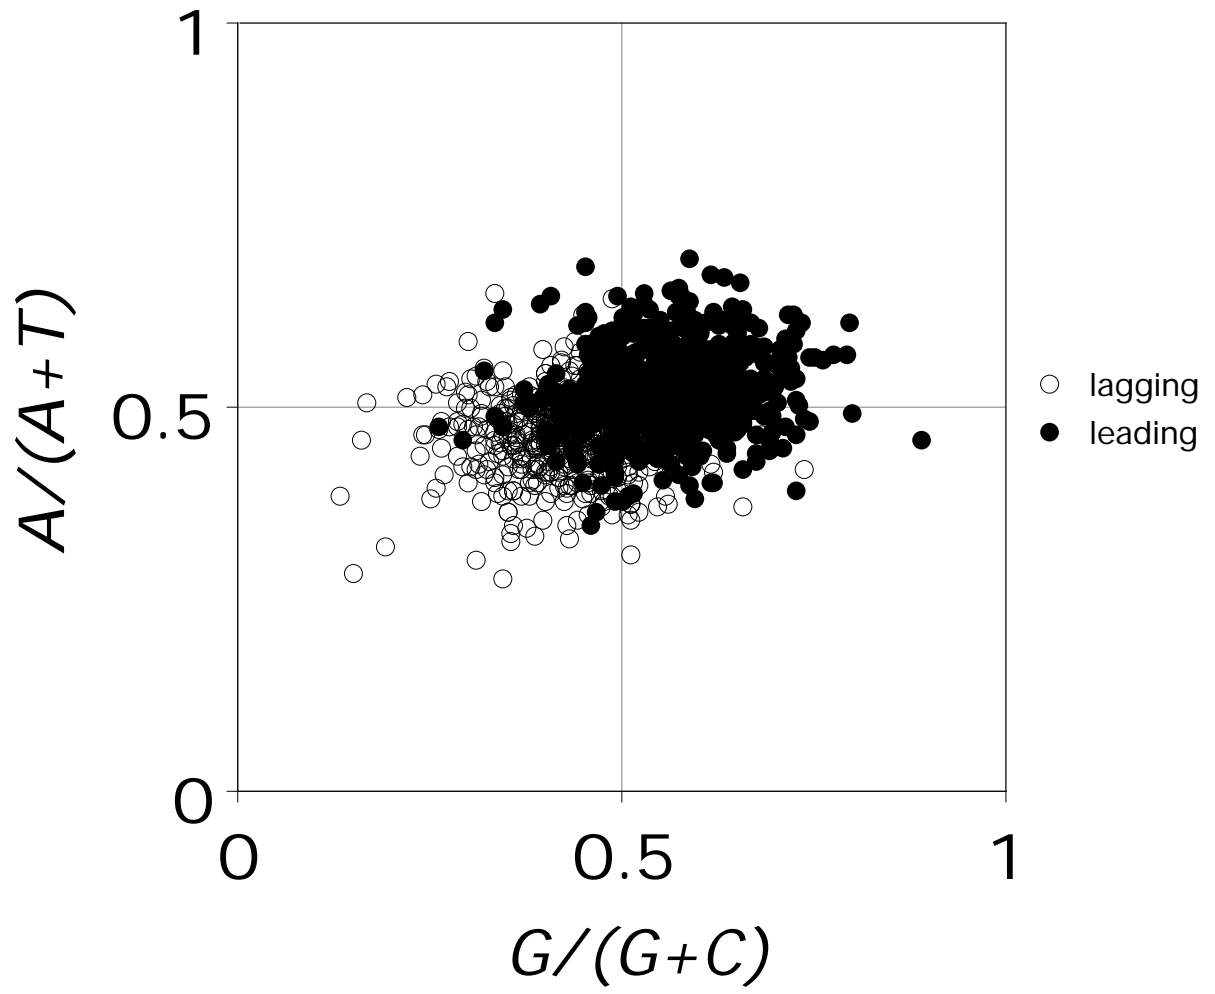

*Lactococcus lactis*

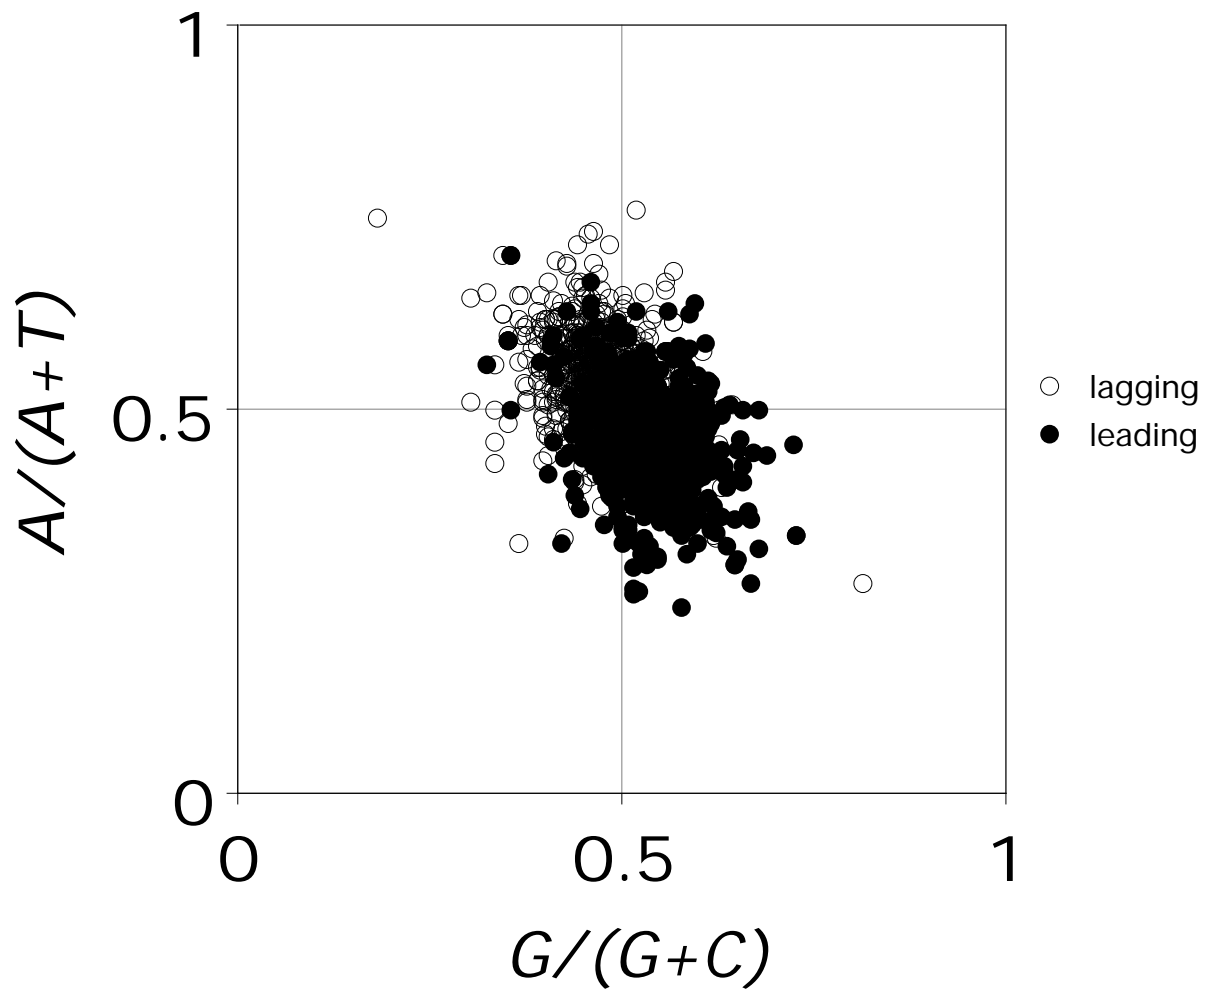

*Mycobacterium leprae*



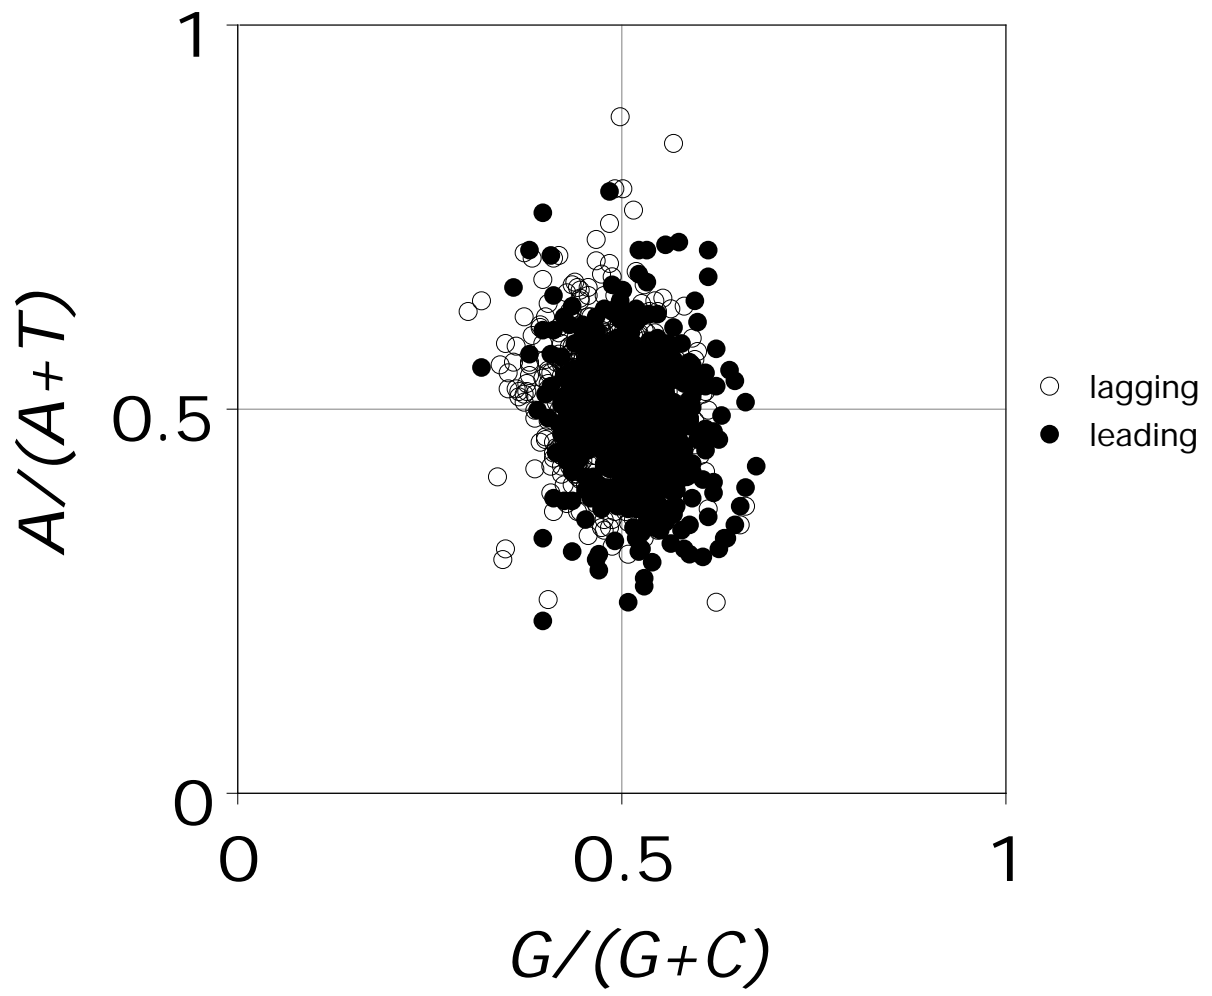

*Mycobacterium tuberculosis* H37Rv

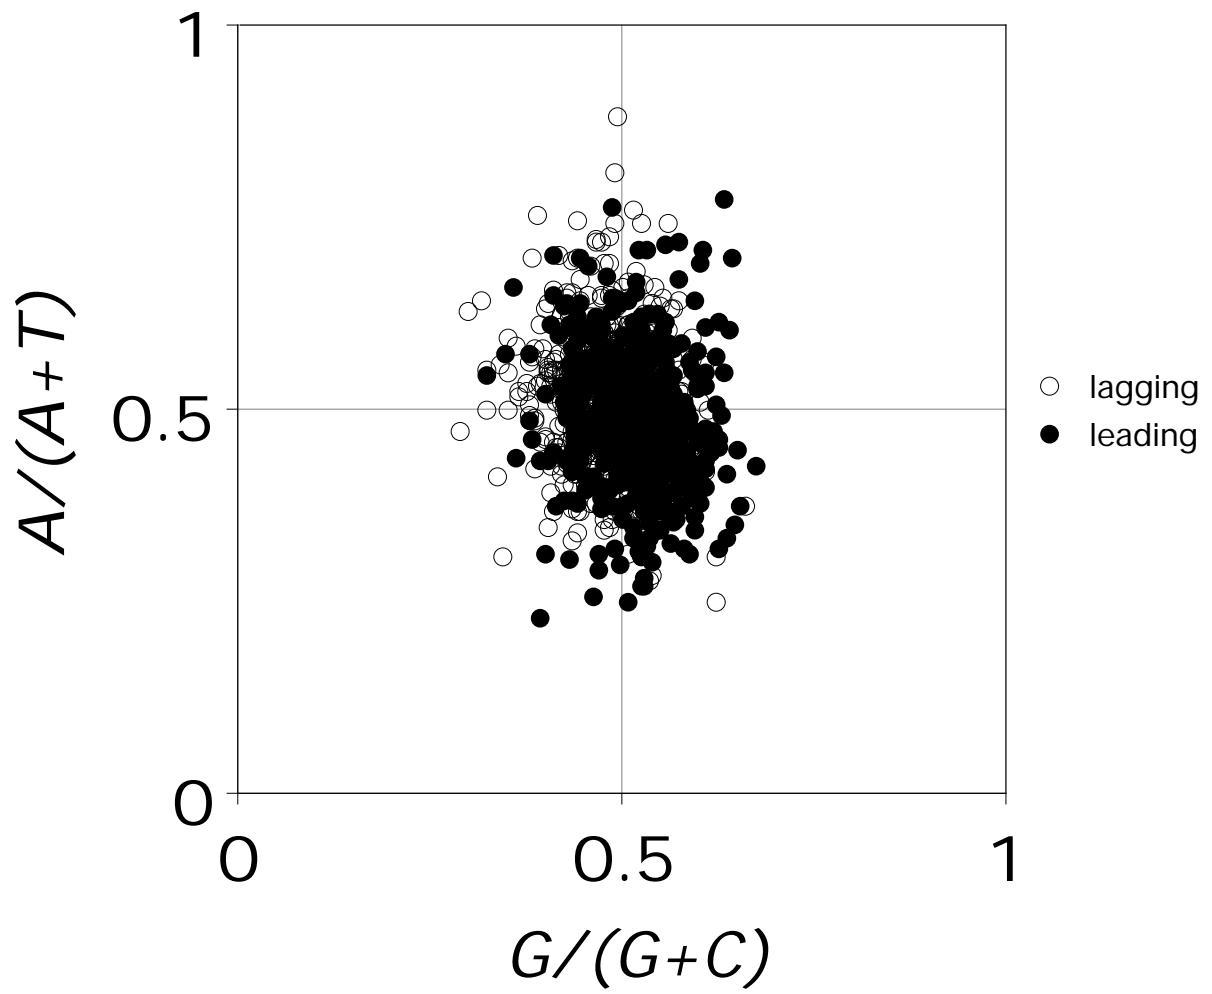

*Mycobacterium tuberculosis* CDC1551

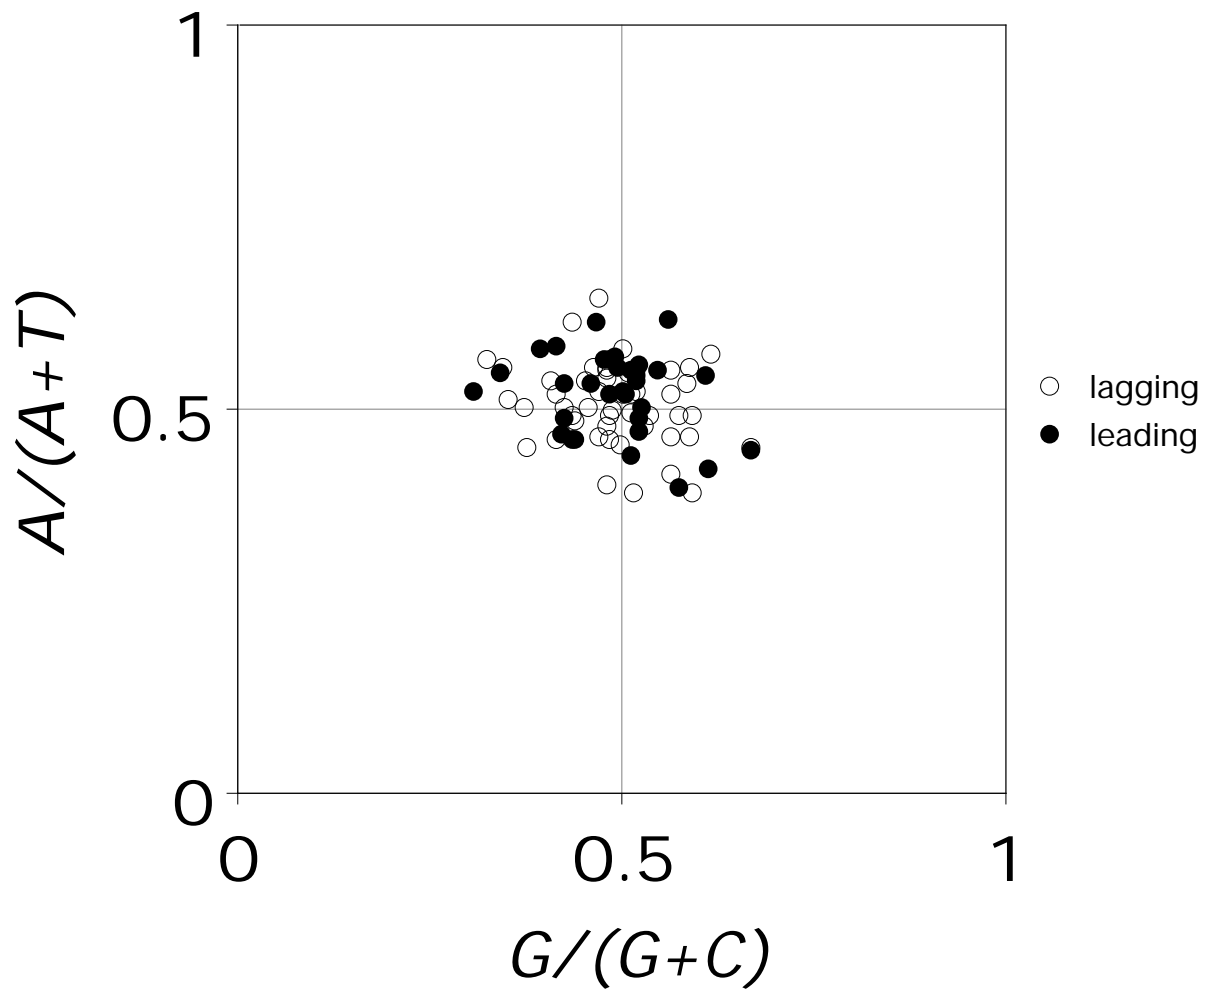

*Mycoplasma genitalium*

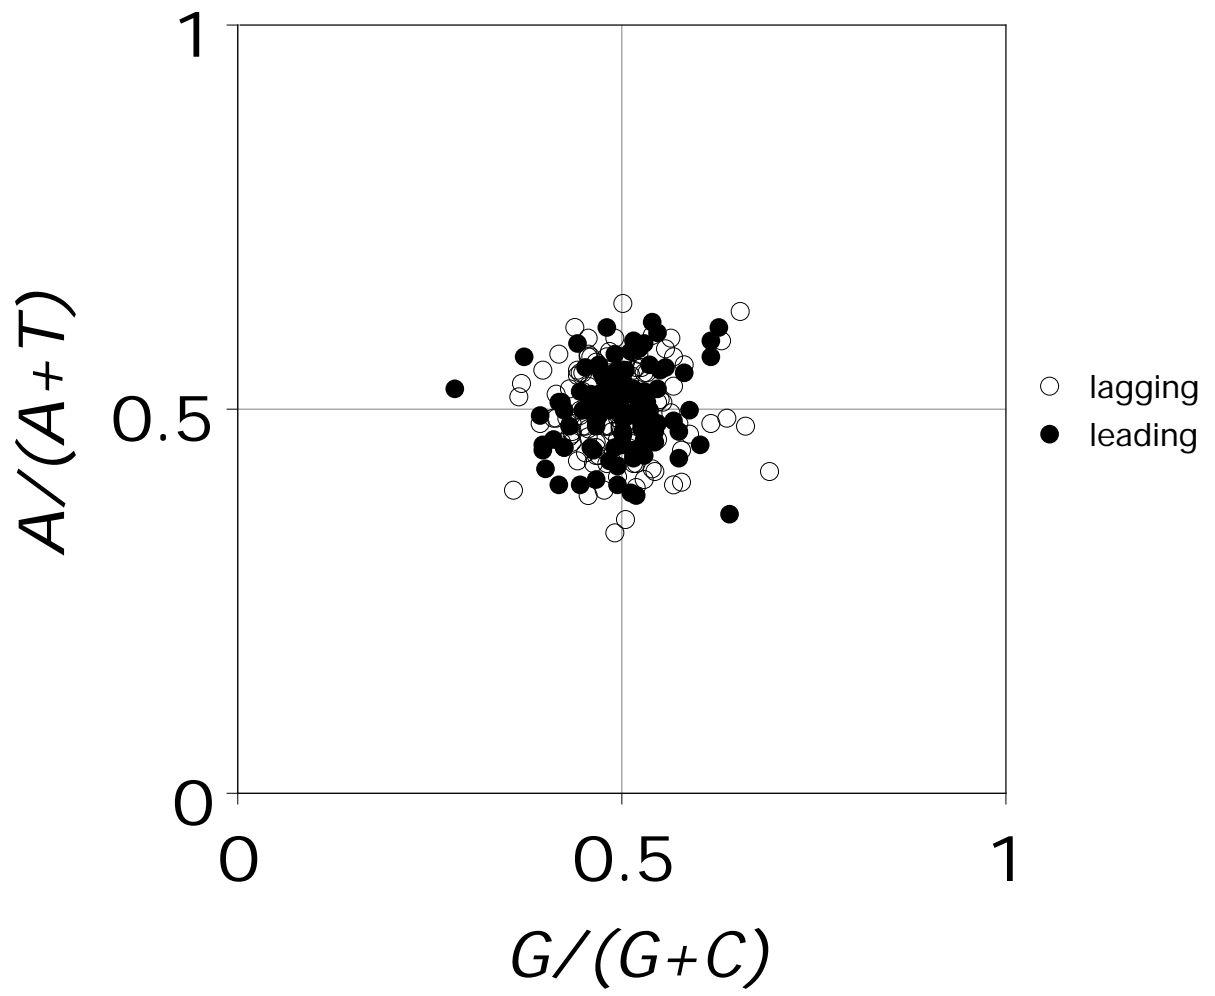

*Mycoplasma pneumoniae*

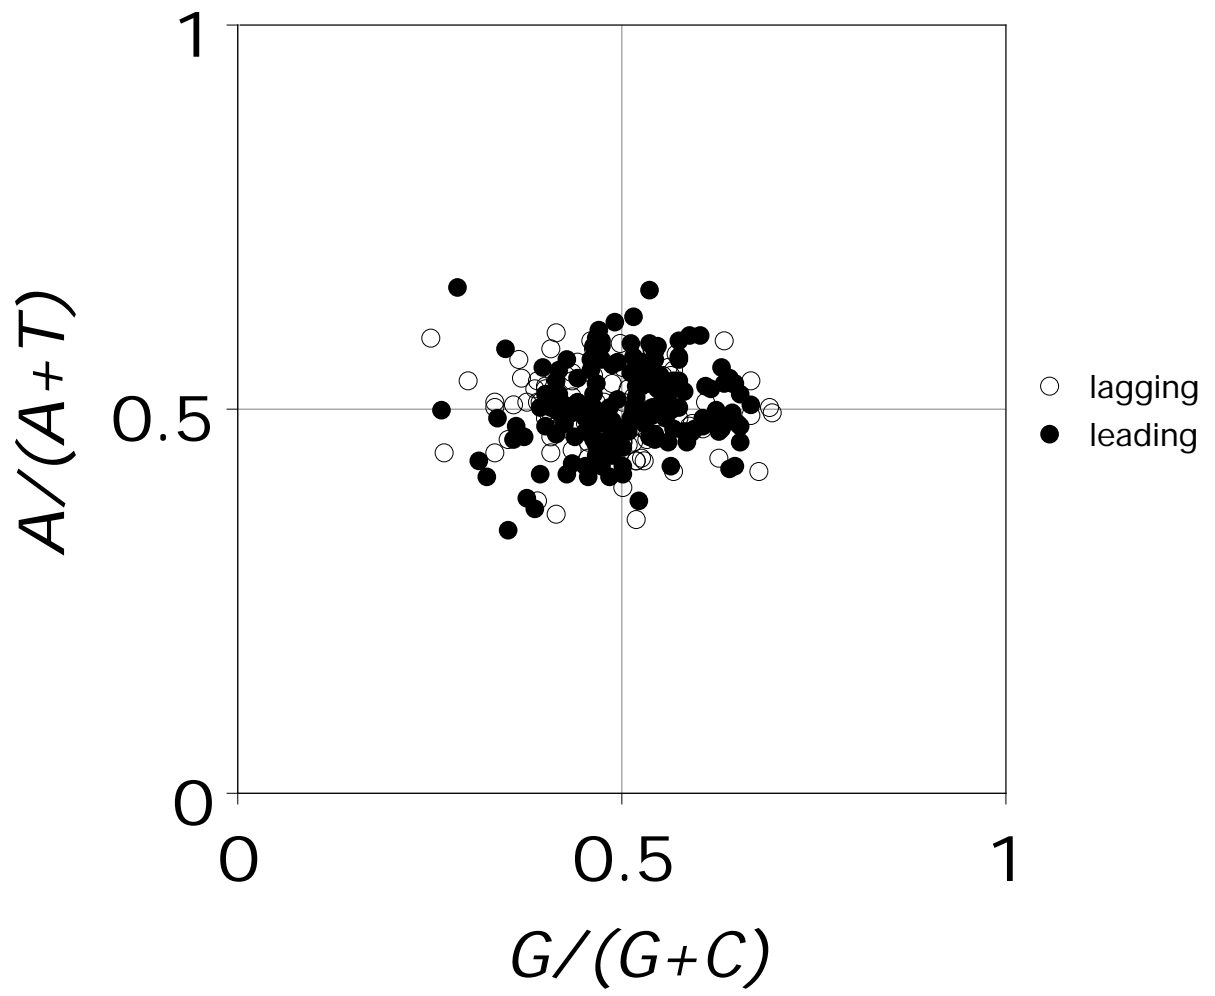

*Mycoplasma pulmonis*

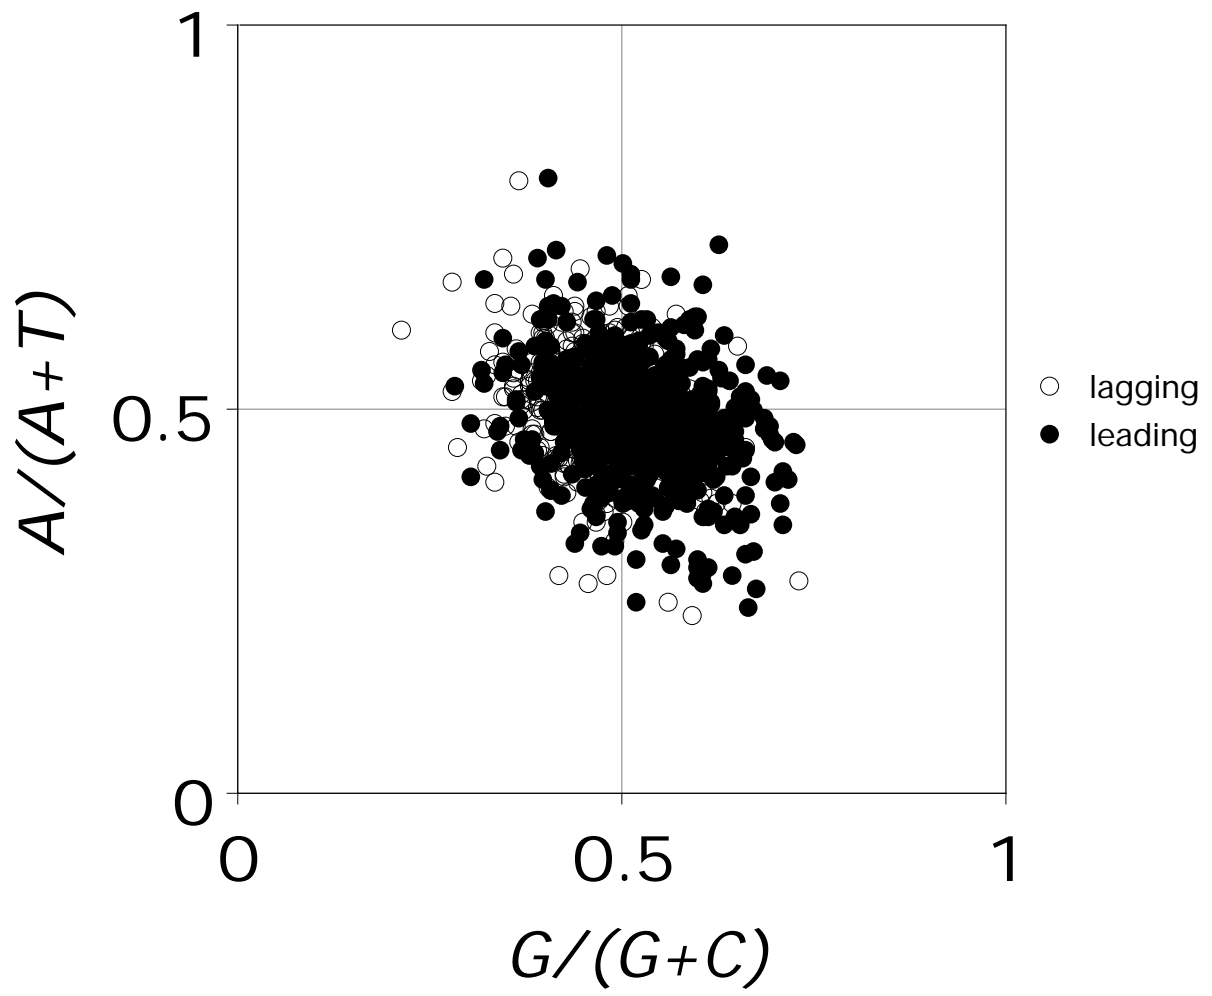

*Neisseria meningitidis* Z2491 (A)

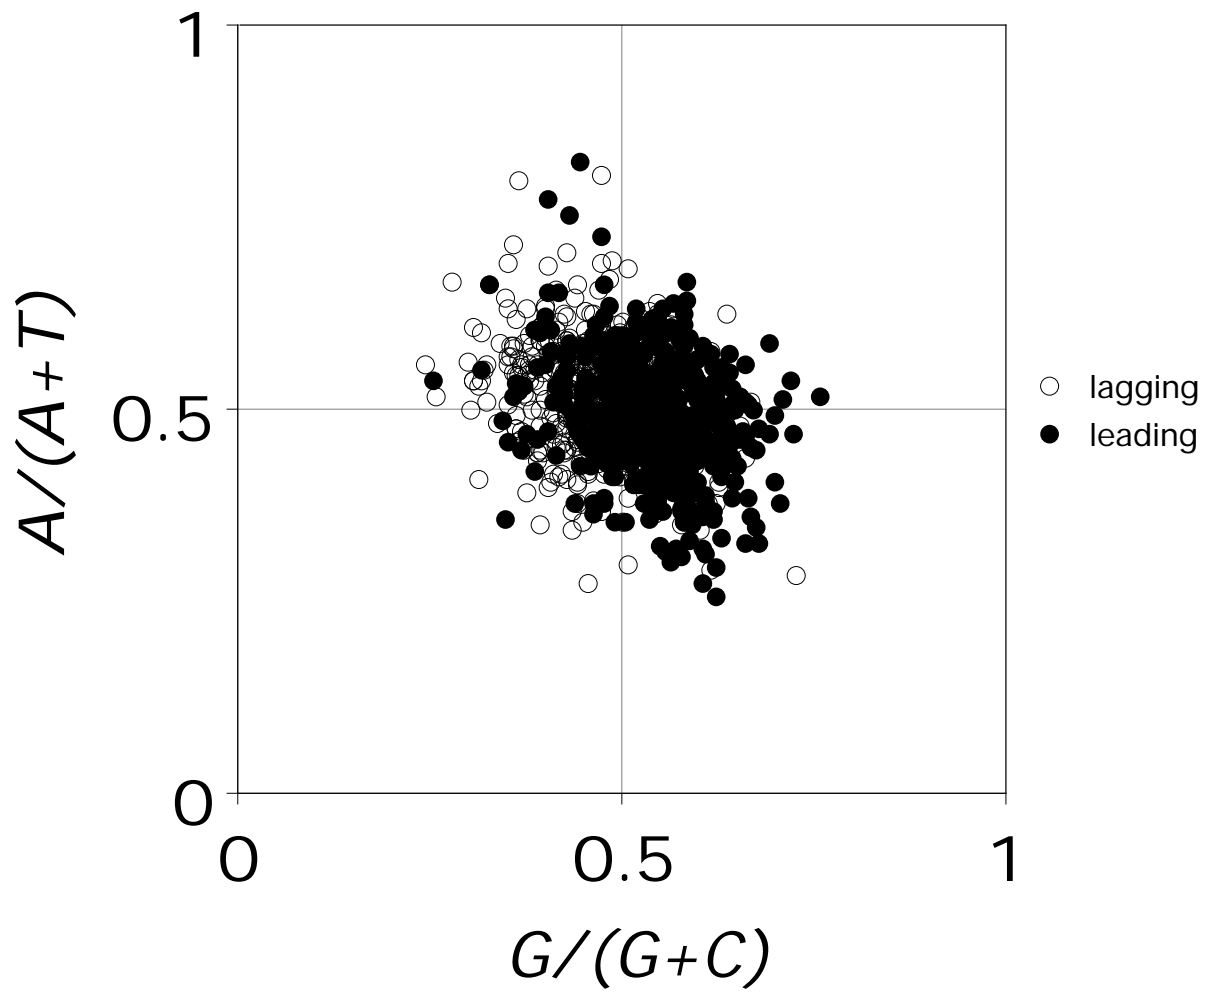

*Neisseria meningitidis* MC58 (B)

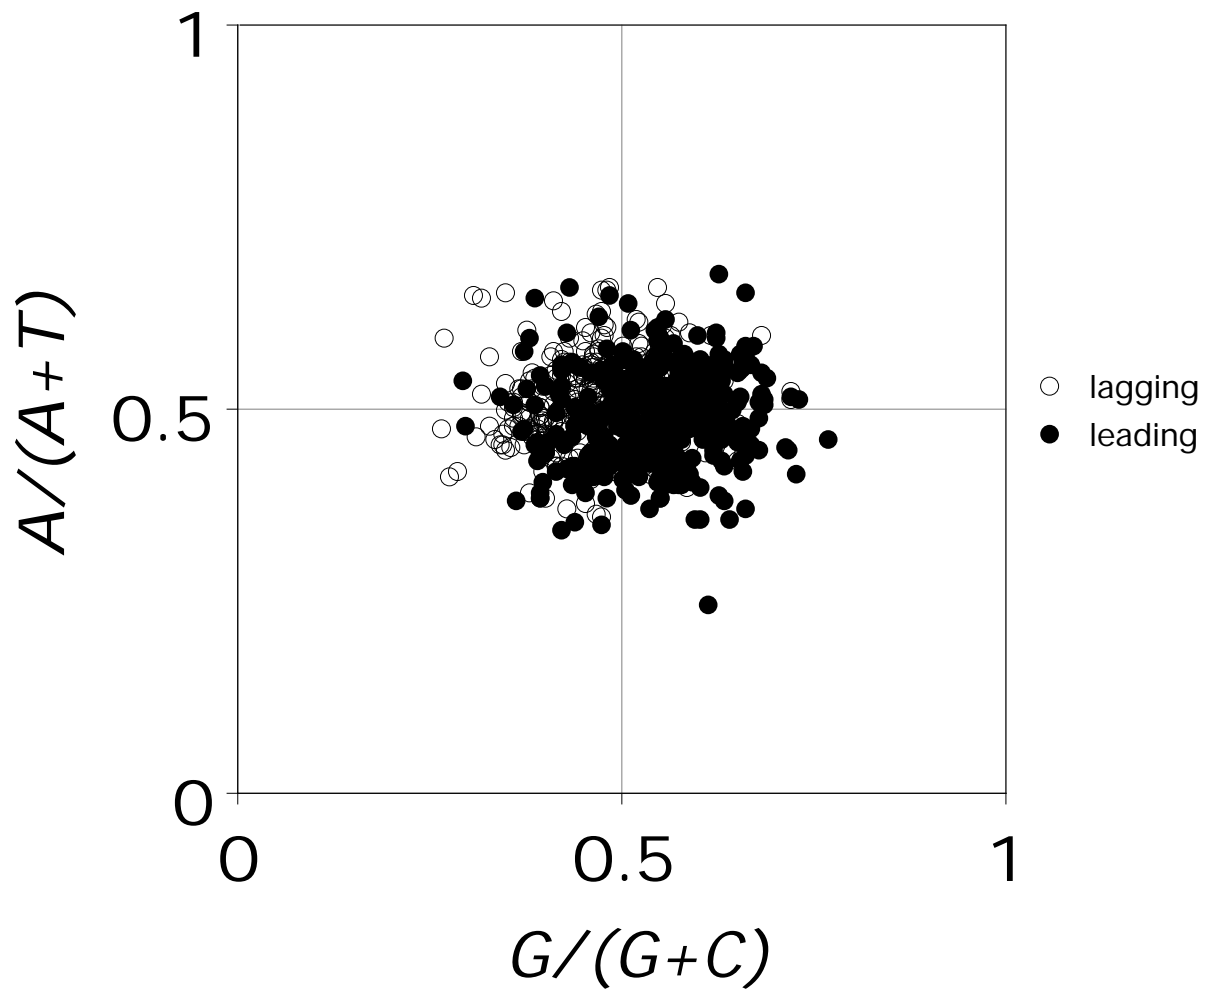

*Pasteurella multocida*



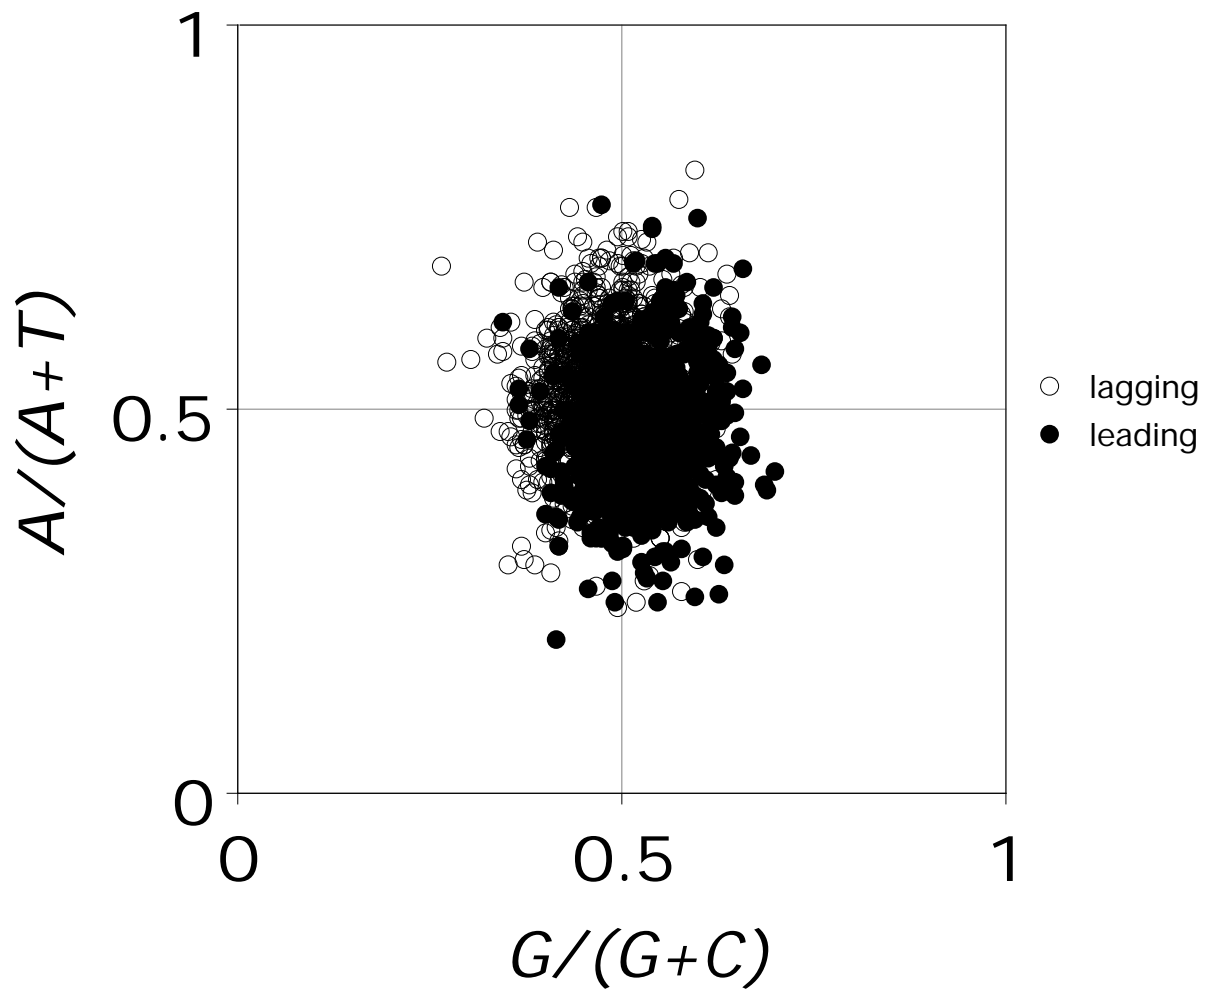

*Pseudomonas aeruginosa*

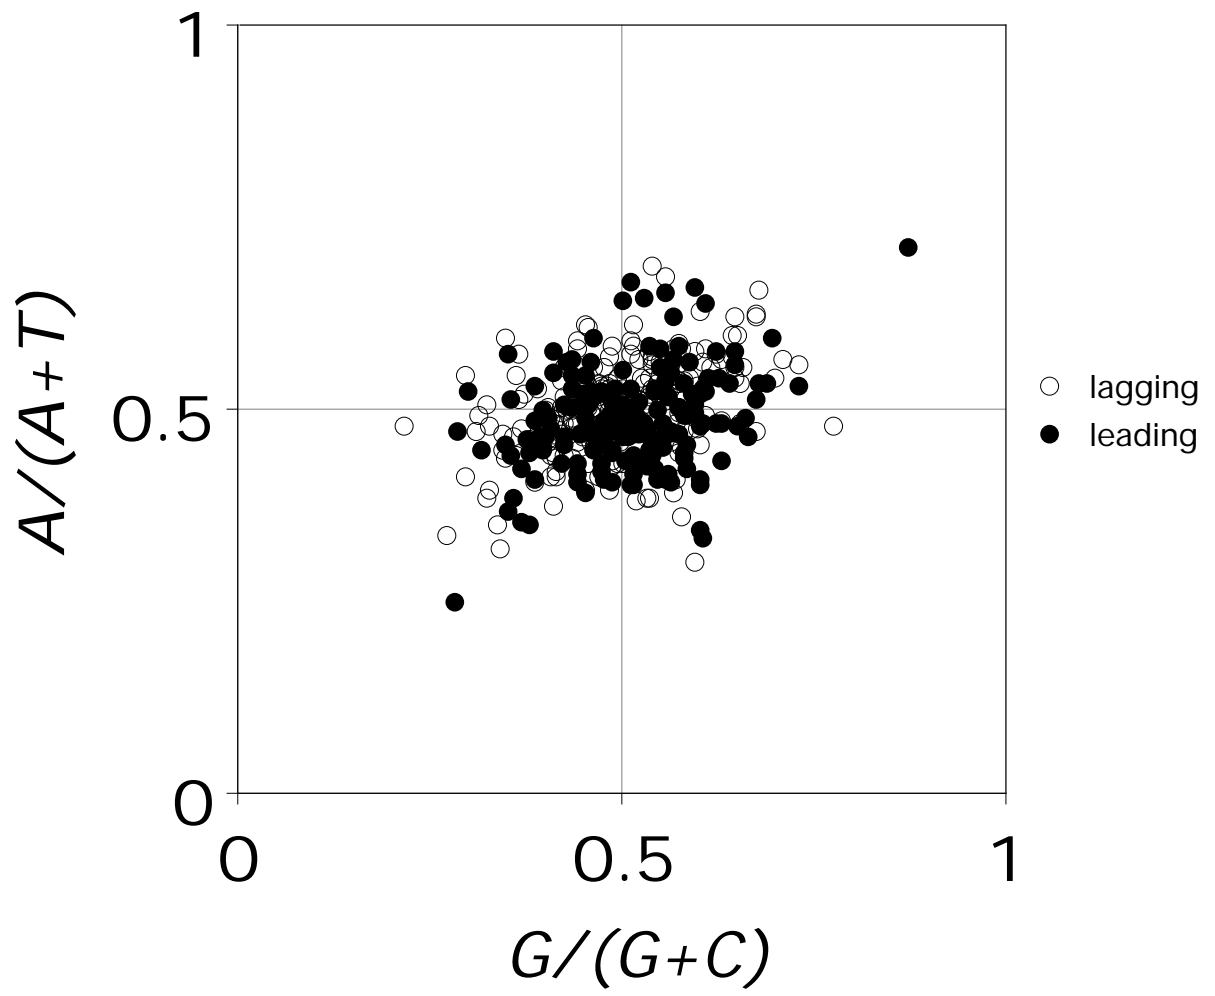

*Pyrococcus abyssi*

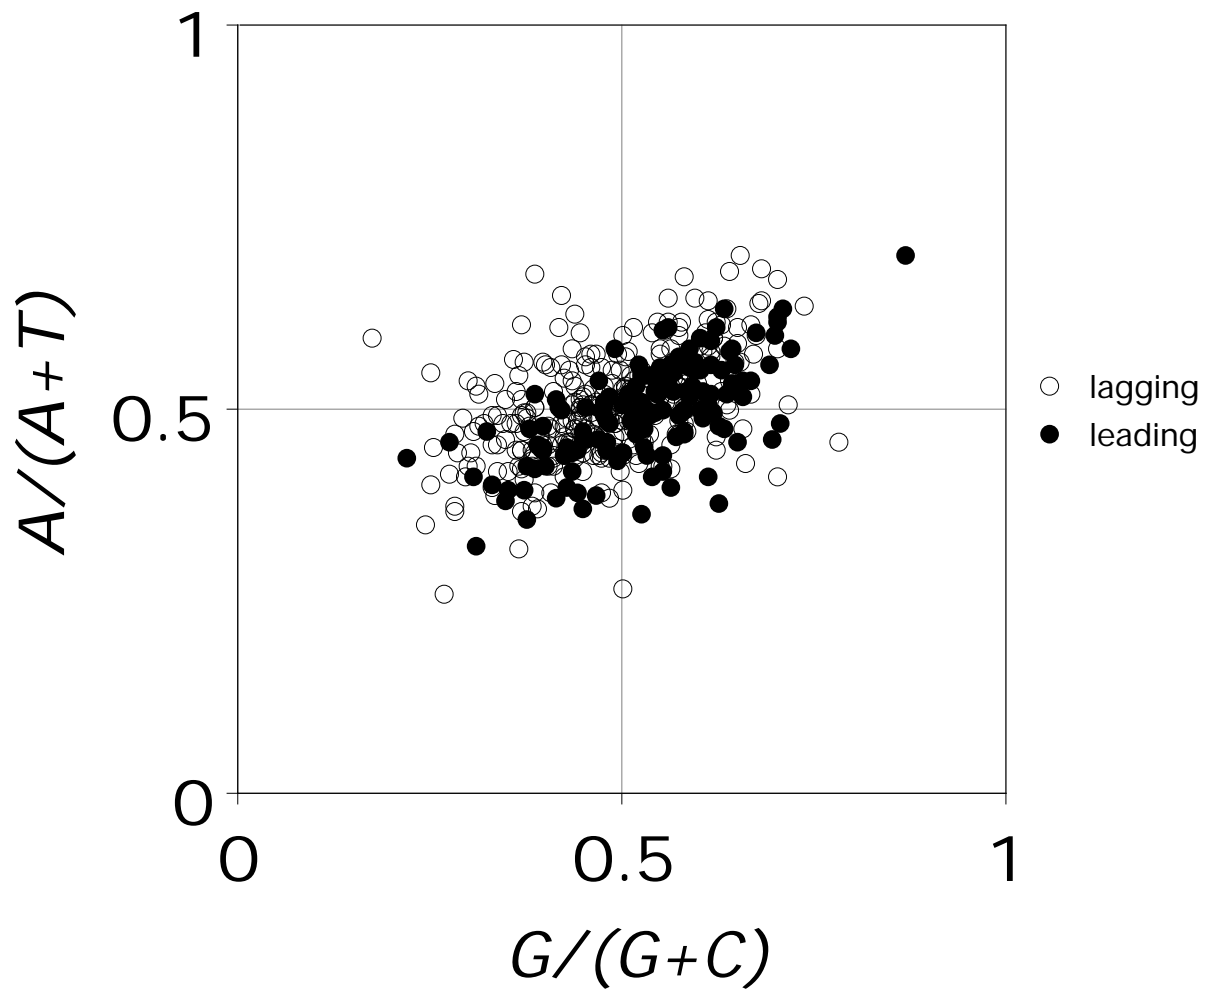

*Pyrococcus horikoshii*

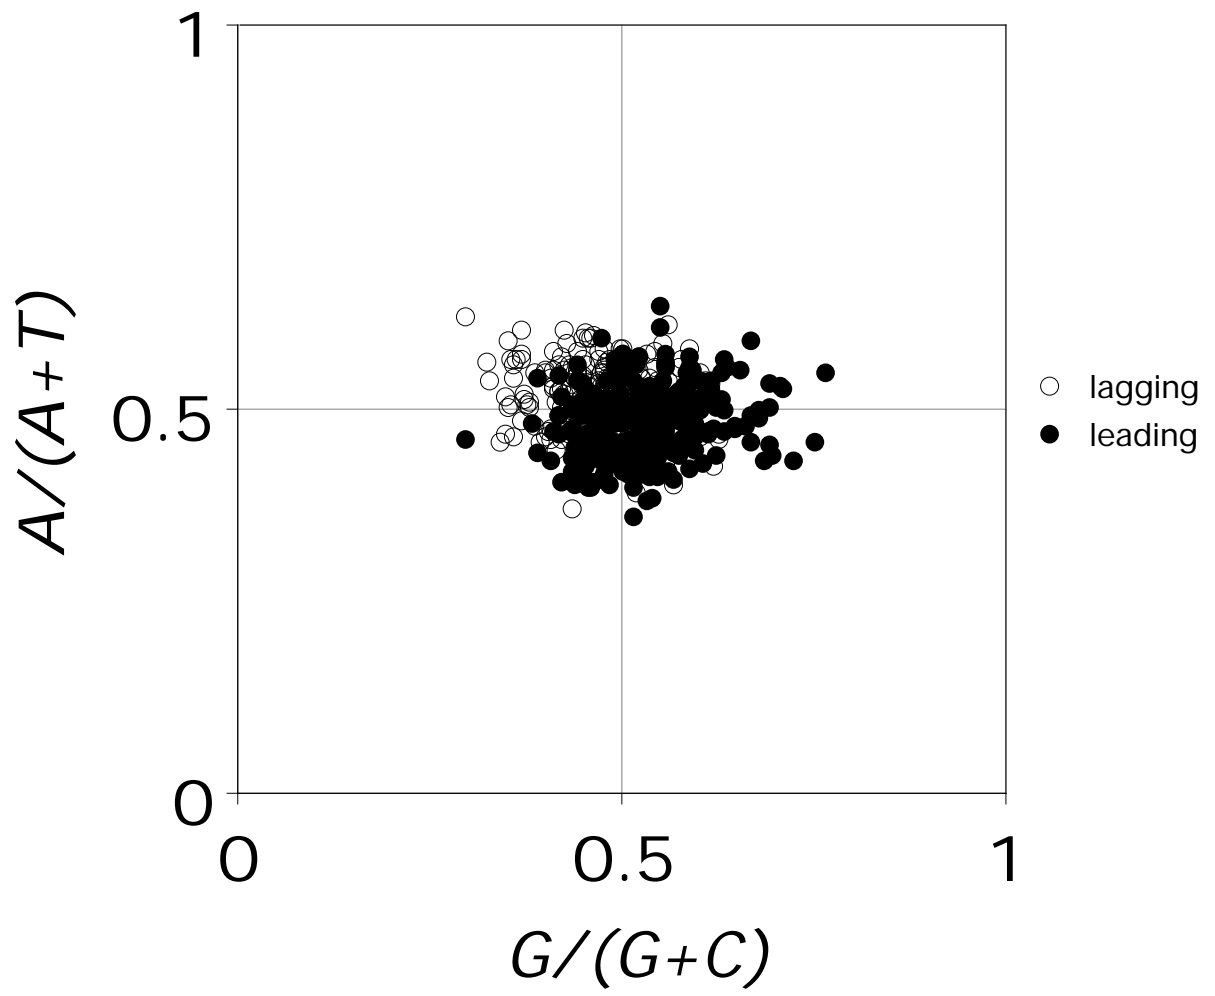

*Rickettsia prowazekii*

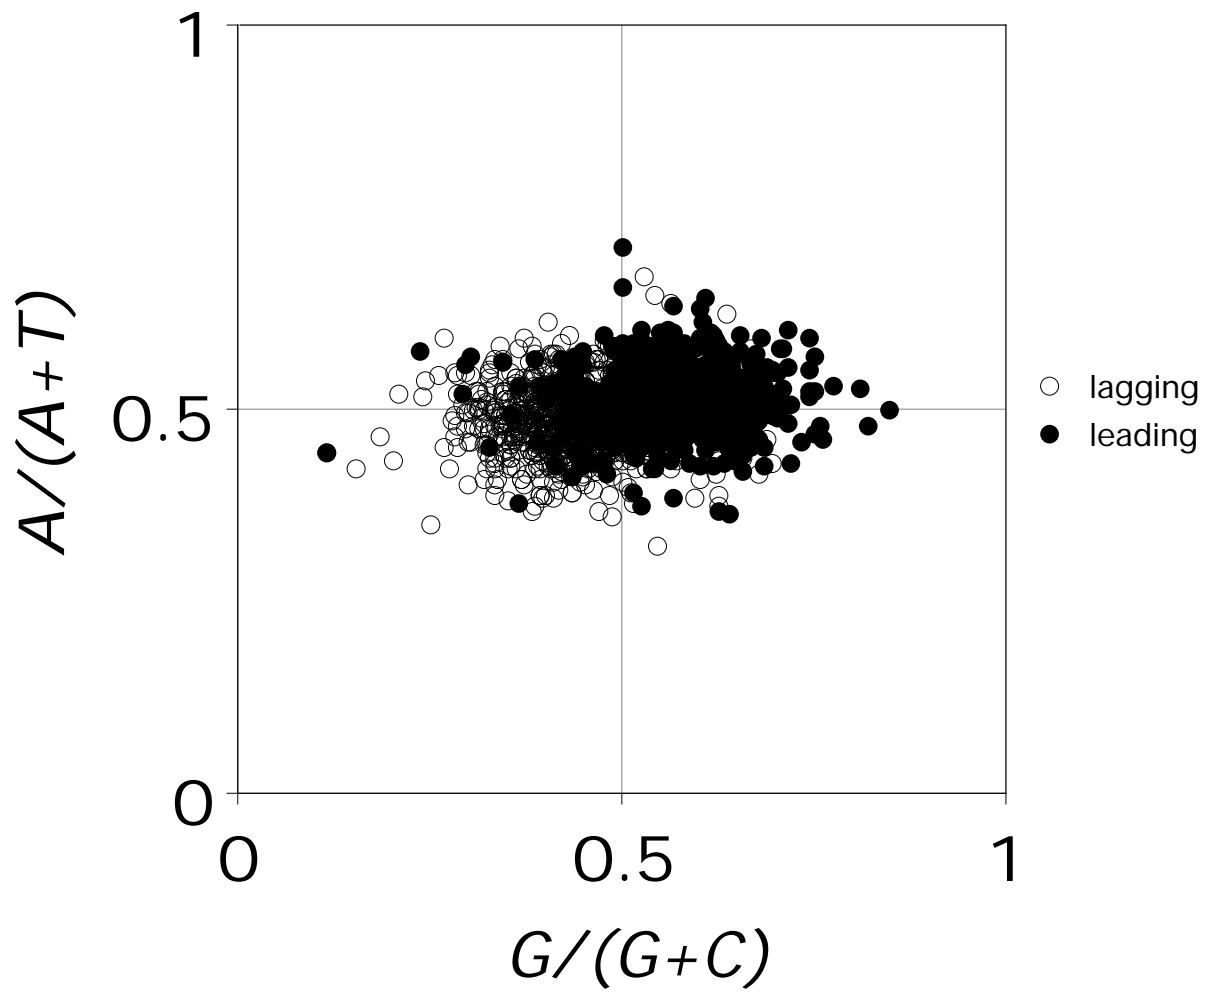

*Staphylococcus aureus* Mu50

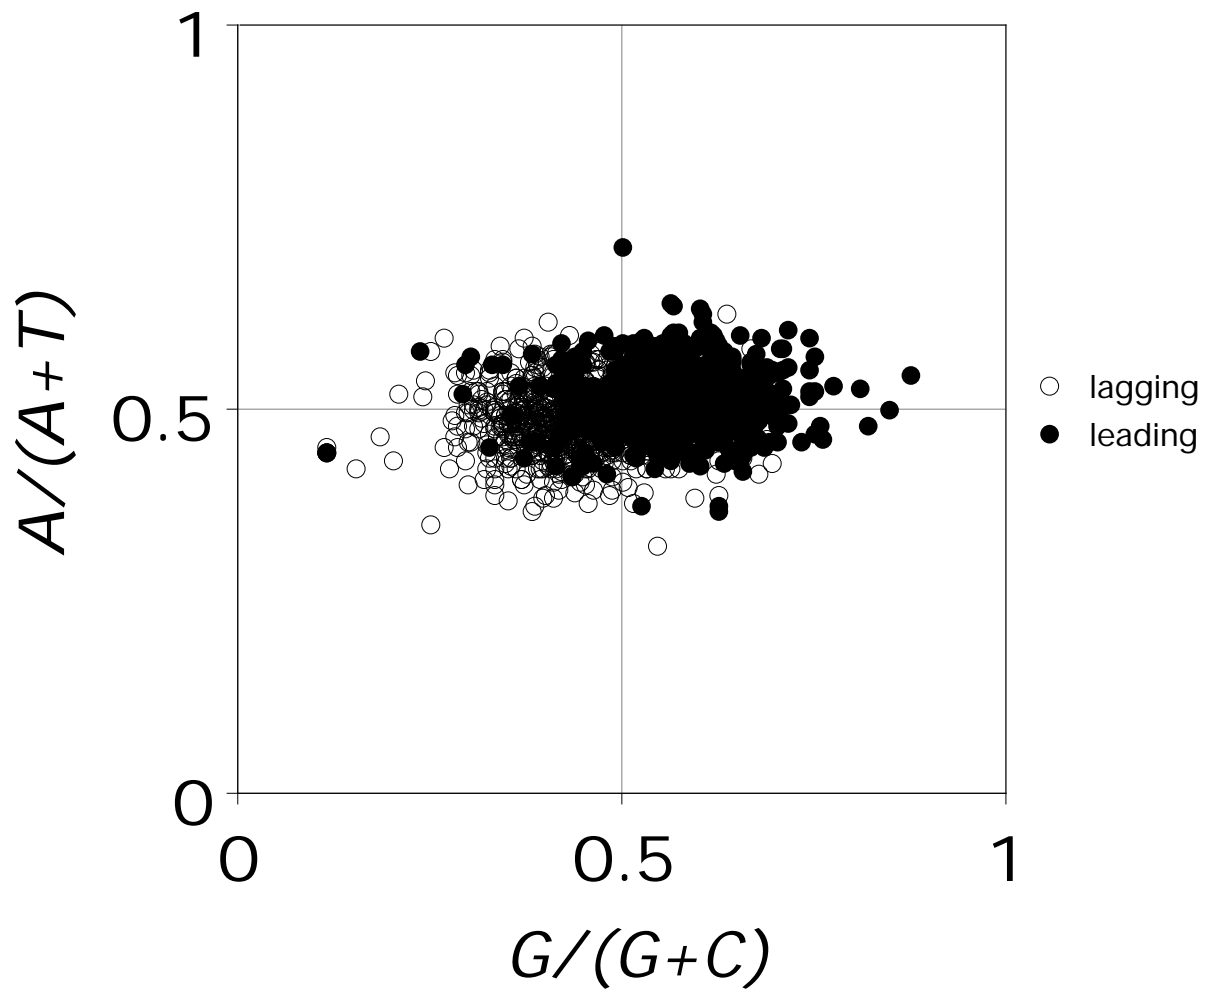

*Staphylococcus aureus* N315

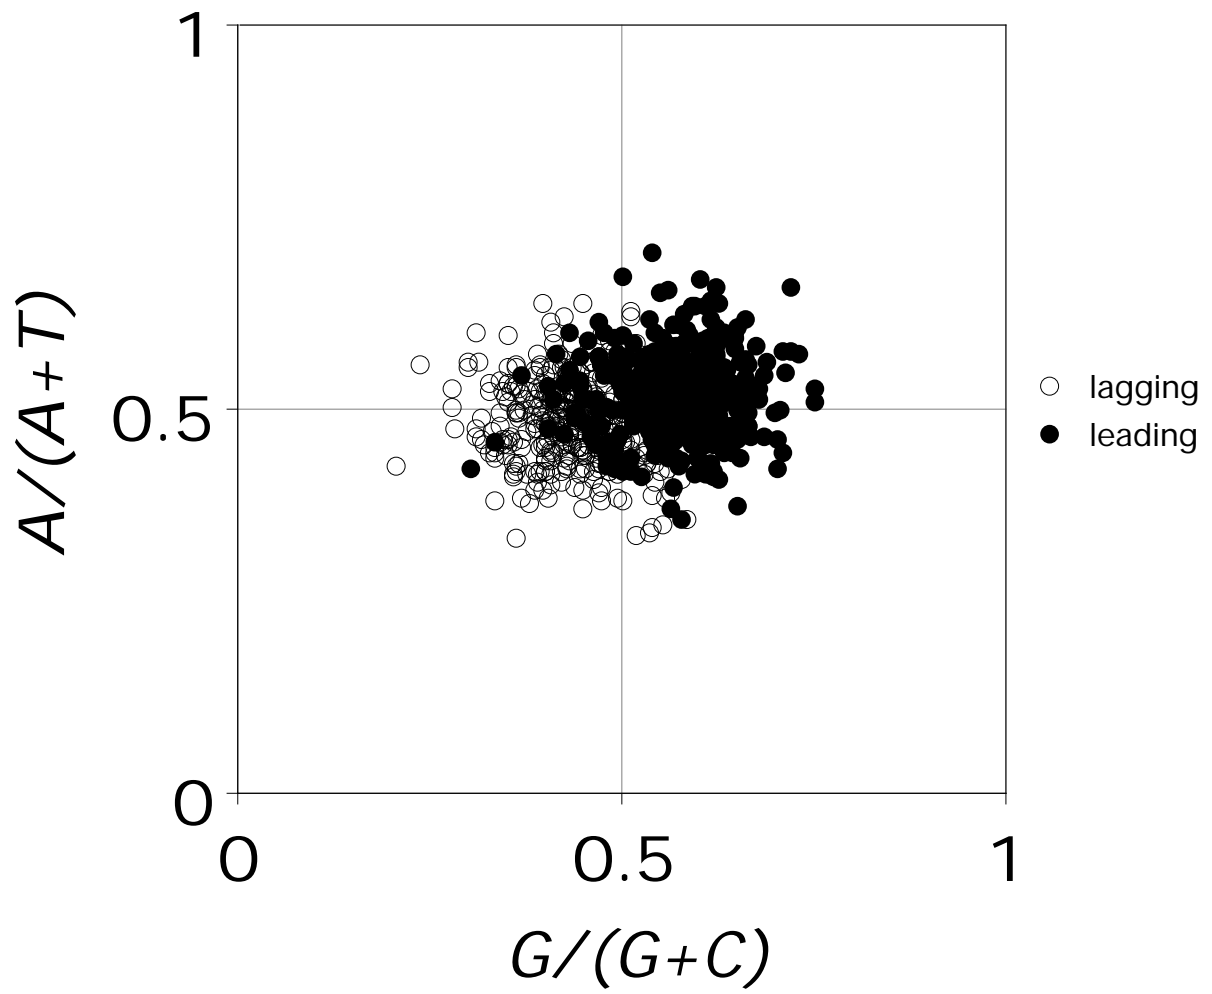

*Streptococcus pyogenes*

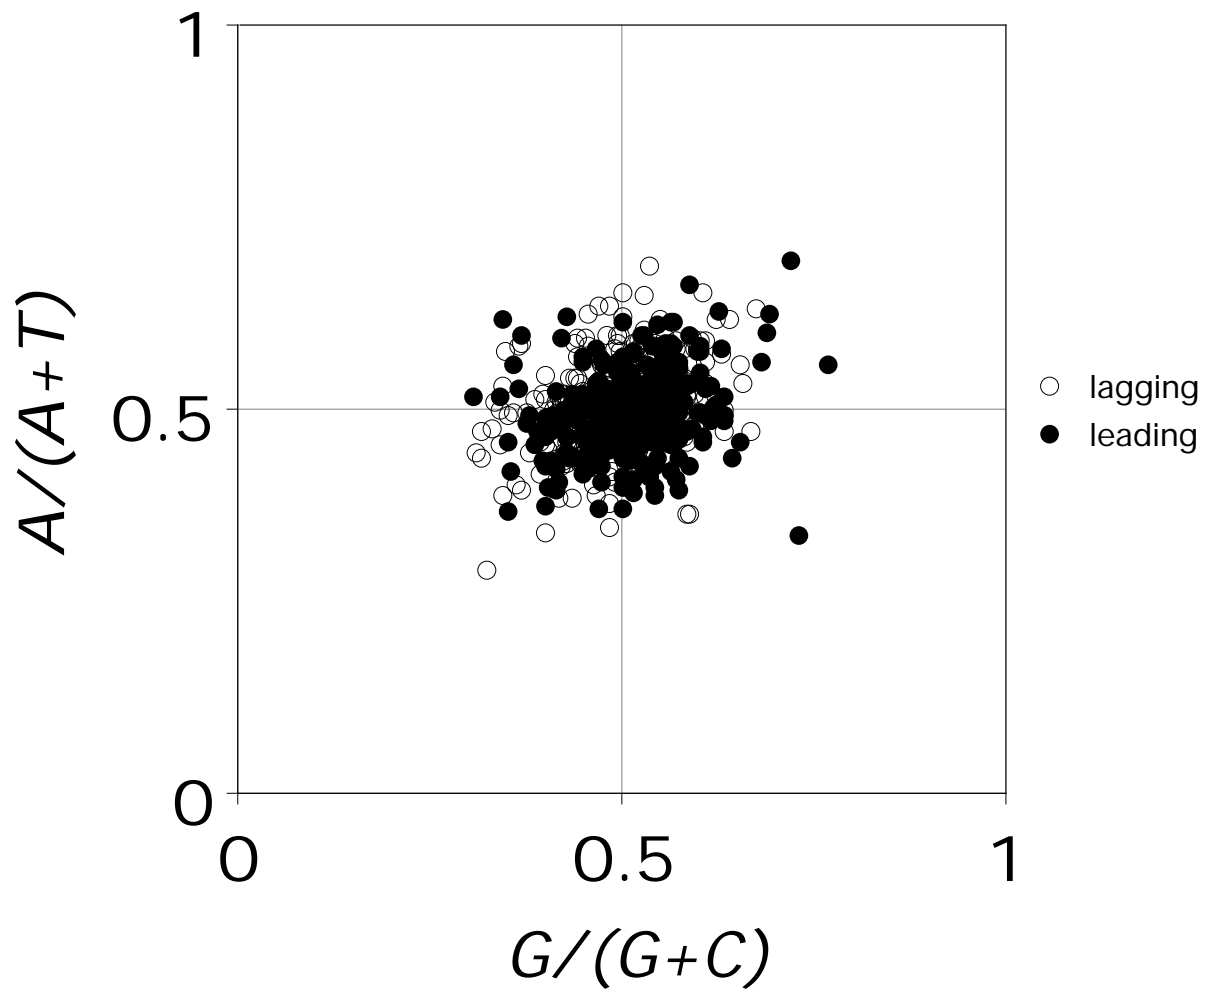

*Thermoplasma acidophilum*



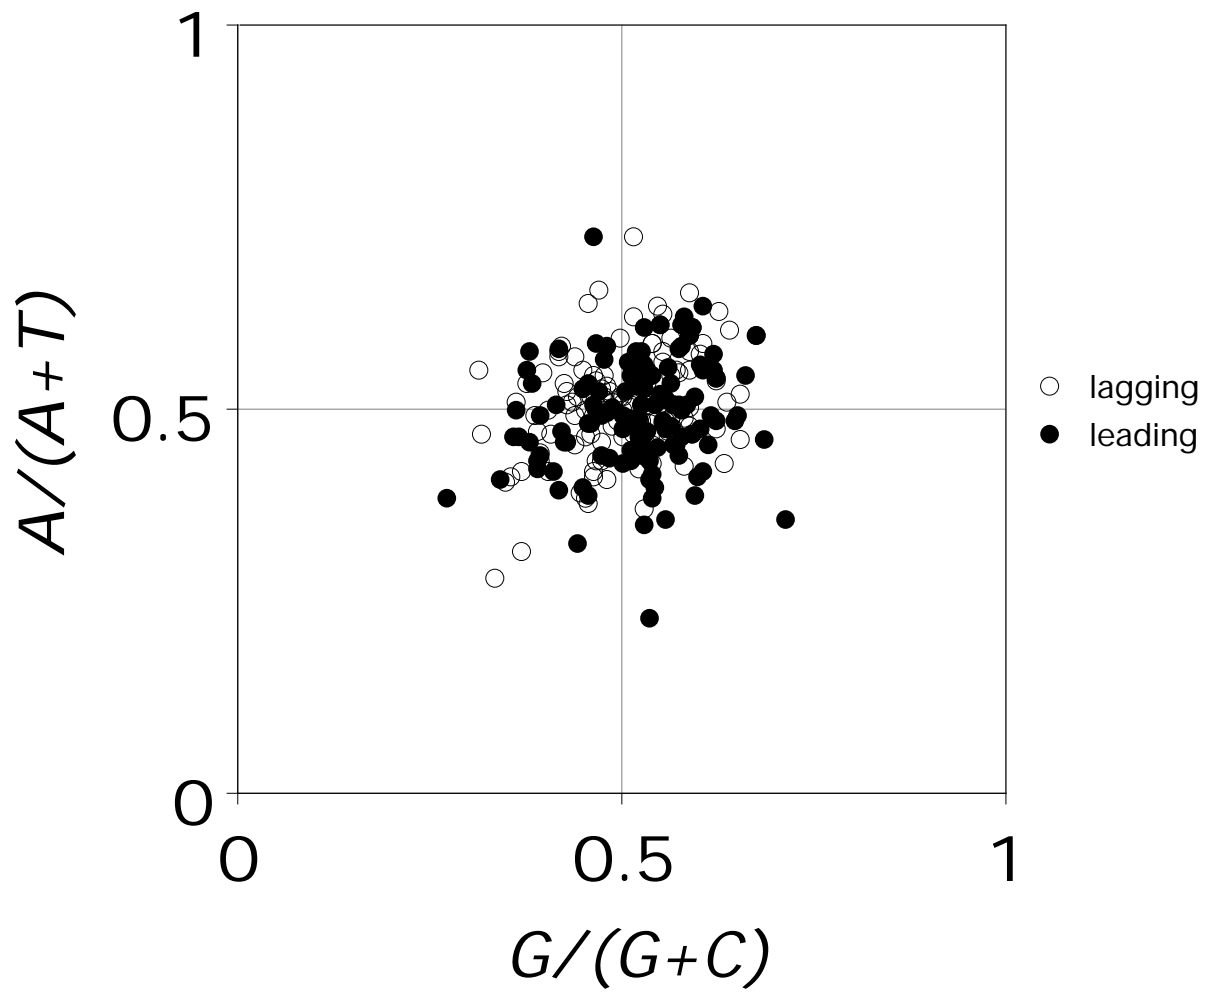

*Thermotoga maritima*

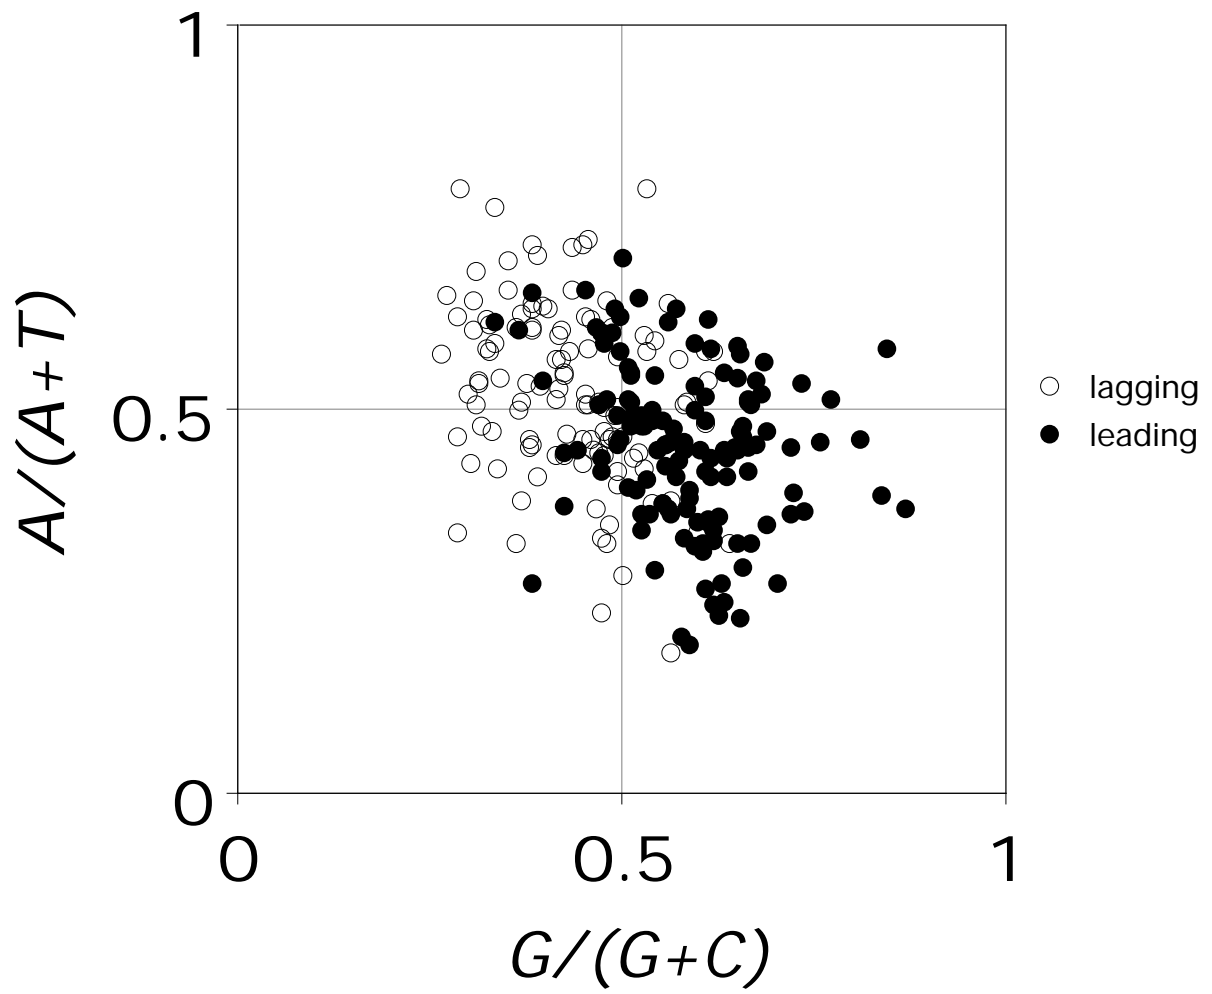

*Treponema pallidum*

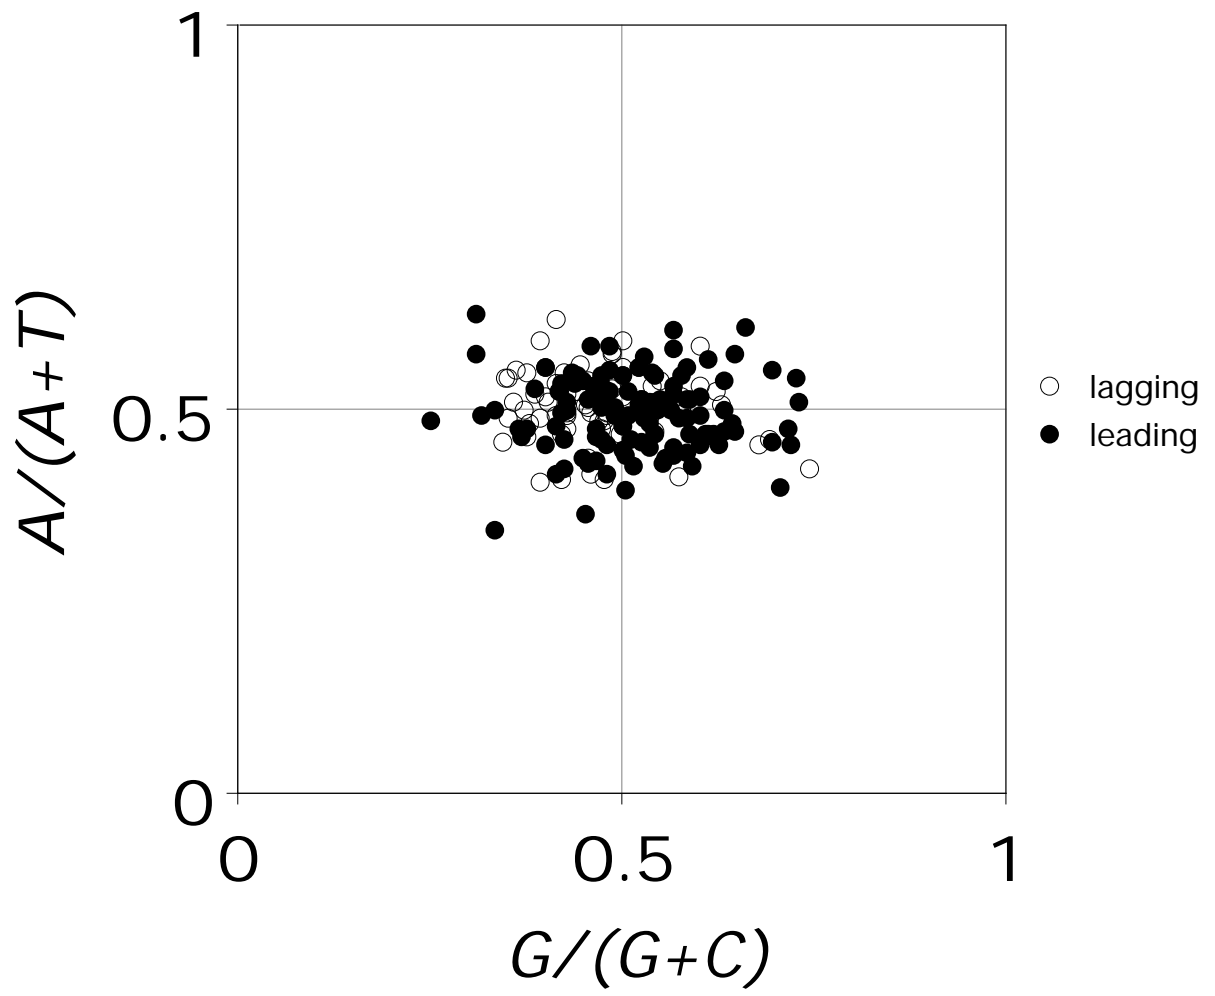

*Ureaplasma urealyticum*

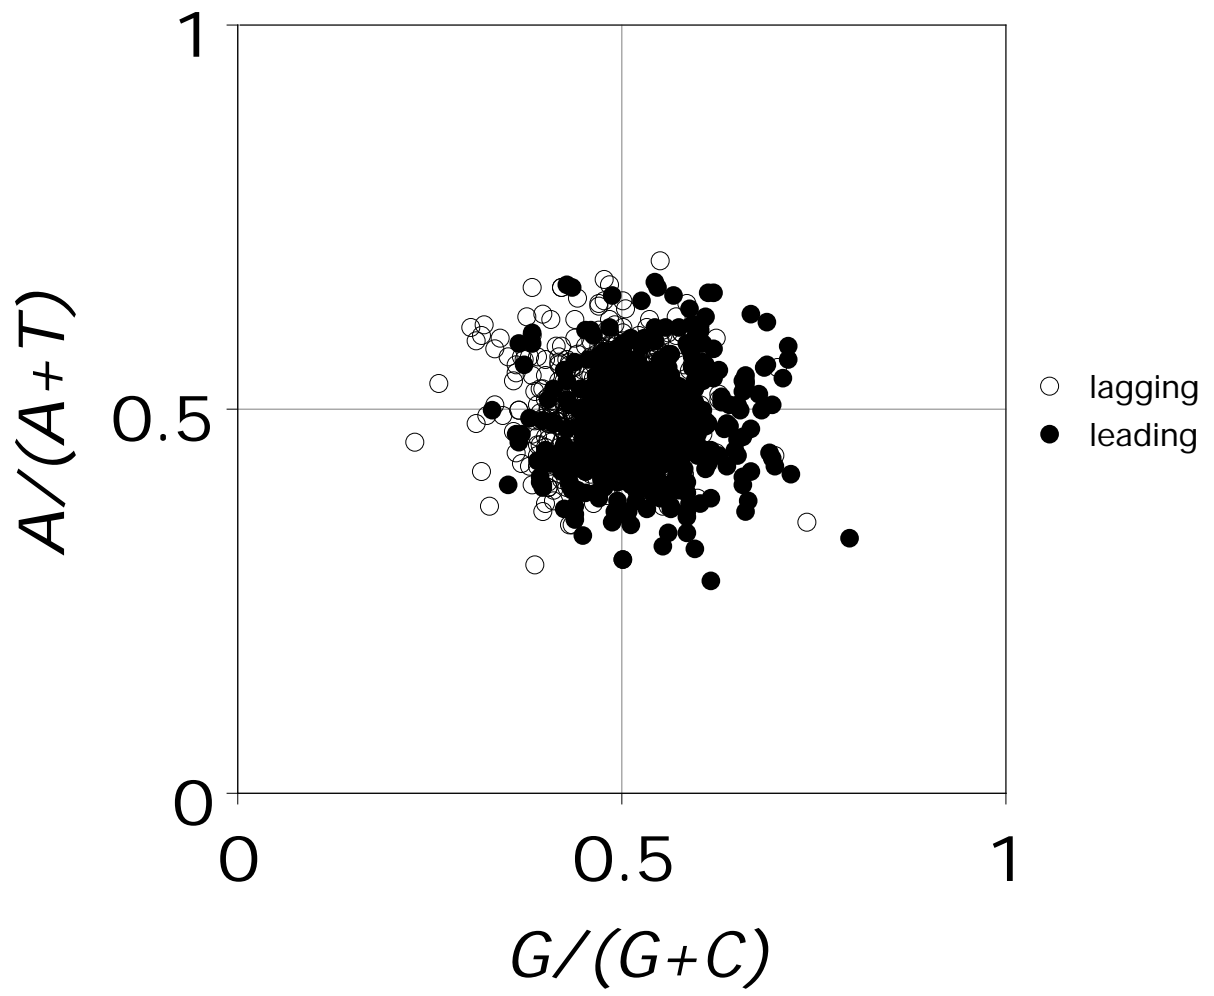

*Vibrio cholerae* chromosome 1

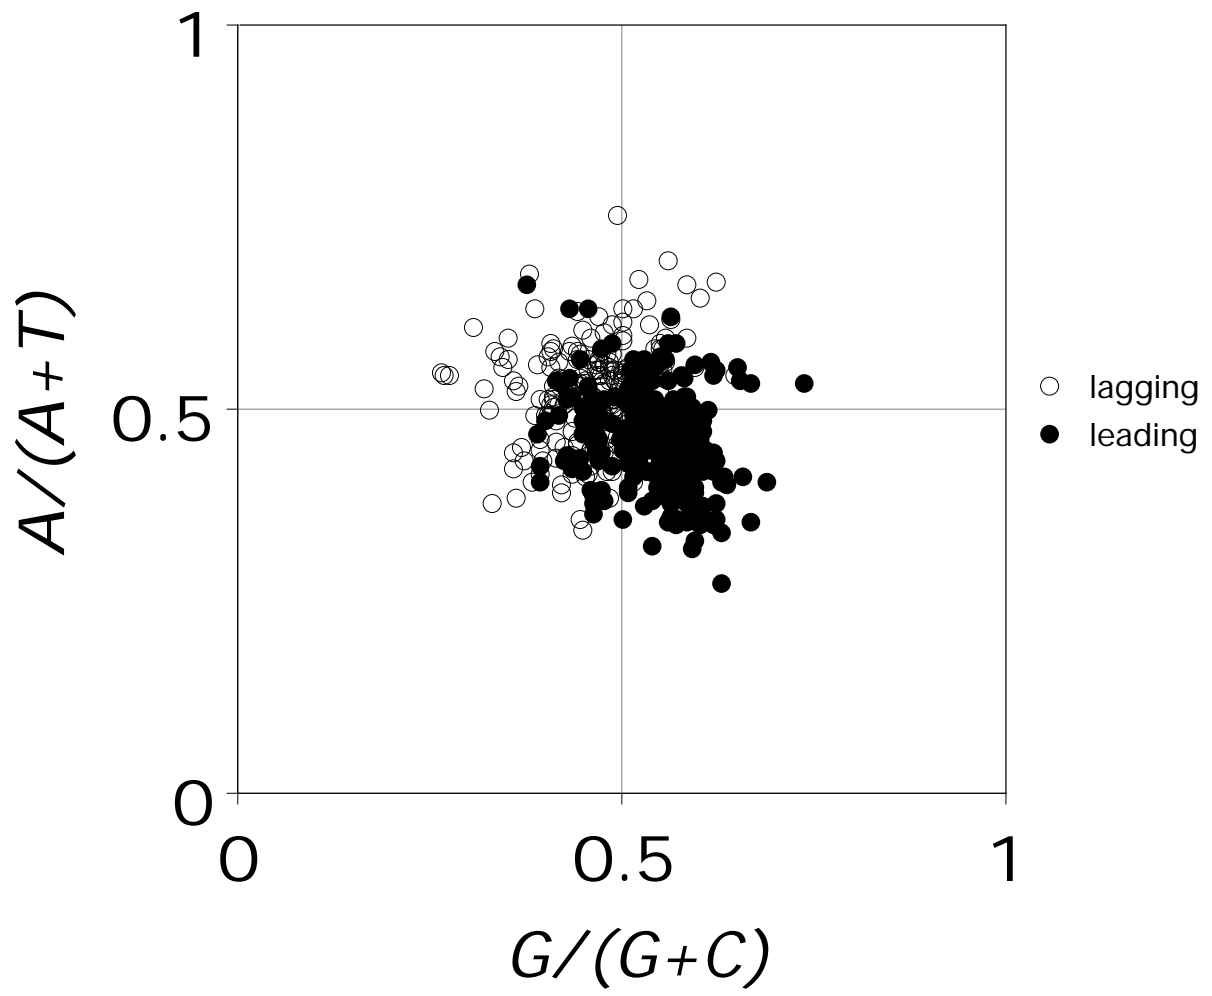

*Vibrio cholerae* chromosome 2

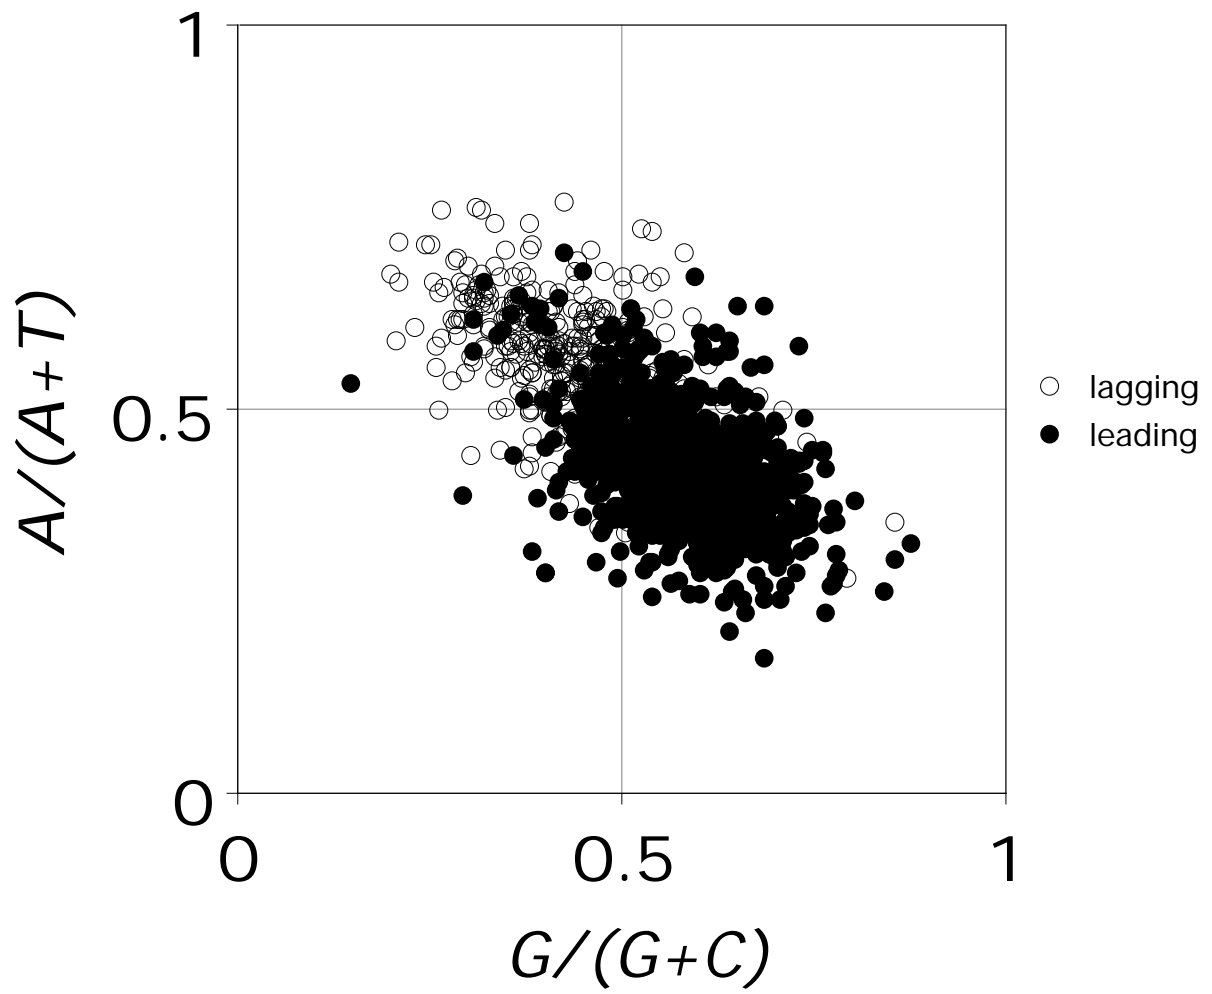

*Xylella fastidiosa*

| Chromosome | Template Seq. |       | $GC_{IGR}$ |       |      | $G/(G+C)$ |       |      | $A (A+T)$ |       |      | x,y Midpoint |       | Difference in PR2-bias |          |             |
|------------|---------------|-------|------------|-------|------|-----------|-------|------|-----------|-------|------|--------------|-------|------------------------|----------|-------------|
|            | #lead         | #lagg | lead       | lagg  | Sig. | $x_l$     | $x_2$ | Sig. | $y_l$     | $y_2$ | Sig. | $x_c$        | $y_c$ | $B_l$                  | $B_{II}$ | $B_l\%$     |
| B. hal     | 348           | 70    | 0.407      | 0.397 | ns   | 0.619     | 0.553 | ***  | 0.536     | 0.537 | ns   | 0.586        | 0.536 | 0.066                  | 0.093    | 41.4        |
| B. sub     | 416           | 89    | 0.385      | 0.388 | ns   | 0.604     | 0.558 | ***  | 0.536     | 0.507 | **   | 0.581        | 0.522 | 0.054                  | 0.084    | <b>39.4</b> |
| B. bur     | 47            | 18    | 0.206      | 0.203 | ns   | 0.697     | 0.492 | ***  | 0.445     | 0.589 | ***  | 0.595        | 0.517 | 0.251                  | 0.096    | <b>72.3</b> |
| Buch       | 47            | 36    | 0.145      | 0.154 | ns   | 0.547     | 0.552 | ns   | 0.502     | 0.542 | *    | 0.550        | 0.522 | 0.040                  | 0.054    | 42.7        |
| C. cre     | 234           | 191   | 0.624      | 0.625 | ns   | 0.495     | 0.478 | *    | 0.485     | 0.504 | ns   | 0.486        | 0.494 | 0.025                  | 0.015    | 63.6        |
| C. jej     | 91            | 51    | 0.198      | 0.193 | ns   | 0.620     | 0.555 | *    | 0.526     | 0.512 | ns   | 0.588        | 0.519 | 0.066                  | 0.090    | 42.6        |
| C. mur     | 34            | 30    | 0.329      | 0.324 | ns   | 0.626     | 0.428 | ***  | 0.445     | 0.464 | ns   | 0.527        | 0.455 | 0.199                  | 0.053    | 79.0        |
| C. pne     | 44            | 38    | 0.327      | 0.312 | ns   | 0.552     | 0.491 | *    | 0.469     | 0.519 | *    | 0.522        | 0.494 | 0.079                  | 0.022    | 77.9        |
| C. pneAR39 | 43            | 41    | 0.317      | 0.312 | ns   | 0.544     | 0.464 | **   | 0.466     | 0.501 | ns   | 0.504        | 0.484 | 0.087                  | 0.017    | 83.7        |
| C. pneJ138 | 138           | 93    | 0.373      | 0.378 | ns   | 0.654     | 0.506 | ***  | 0.510     | 0.471 | ns   | 0.580        | 0.490 | 0.153                  | 0.081    | 65.5        |
| C. tra     | 46            | 36    | 0.344      | 0.363 | ns   | 0.604     | 0.452 | ***  | 0.489     | 0.467 | ns   | 0.528        | 0.478 | 0.154                  | 0.036    | 81.2        |

|           |     |     |       |       |    |       |       |     |       |       |     |       |       |       |       |             |
|-----------|-----|-----|-------|-------|----|-------|-------|-----|-------|-------|-----|-------|-------|-------|-------|-------------|
| D. rad1   | 172 | 165 | 0.630 | 0.645 | ns | 0.473 | 0.455 | ns  | 0.458 | 0.469 | ns  | 0.464 | 0.464 | 0.021 | 0.051 | 29.2        |
| D. rad2   | 25  | 14  | 0.610 | 0.633 | ns | 0.452 | 0.403 | ns  | 0.498 | 0.387 | ns  | 0.427 | 0.443 | 0.121 | 0.093 | 56.7        |
| E. col    | 260 | 167 | 0.446 | 0.444 | ns | 0.520 | 0.472 | *** | 0.502 | 0.482 | ns  | 0.496 | 0.492 | 0.052 | 0.009 | 85.3        |
| E.colEDL  | 357 | 214 | 0.448 | 0.442 | ns | 0.525 | 0.482 | *** | 0.492 | 0.491 | ns  | 0.504 | 0.491 | 0.043 | 0.009 | 82.4        |
| E.colRIMD | 377 | 211 | 0.446 | 0.448 | ns | 0.531 | 0.480 | *** | 0.492 | 0.491 | ns  | 0.506 | 0.491 | 0.051 | 0.010 | 83.4        |
| H. inf    | 120 | 80  | 0.305 | 0.316 | ns | 0.548 | 0.457 | *** | 0.500 | 0.522 | ns  | 0.503 | 0.511 | 0.094 | 0.011 | 89.2        |
| H. pyl    | 86  | 57  | 0.307 | 0.284 | ns | 0.582 | 0.574 | ns  | 0.508 | 0.511 | ns  | 0.578 | 0.510 | 0.009 | 0.079 | 9.8         |
| H. pylJ99 | 70  | 52  | 0.294 | 0.284 | ns | 0.609 | 0.580 | ns  | 0.526 | 0.505 | ns  | 0.595 | 0.516 | 0.036 | 0.096 | 27.2        |
| L.lac     | 217 | 41  | 0.276 | 0.279 | ns | 0.621 | 0.554 | *** | 0.545 | 0.543 | ns  | 0.588 | 0.544 | 0.067 | 0.098 | 40.6        |
| M.lep     | 185 | 94  | 0.553 | 0.546 | ns | 0.545 | 0.481 | *** | 0.501 | 0.576 | *** | 0.513 | 0.538 | 0.099 | 0.041 | <b>70.8</b> |
| M. tub    | 218 | 169 | 0.630 | 0.631 | ns | 0.508 | 0.505 | ns  | 0.520 | 0.522 | ns  | 0.506 | 0.521 | 0.004 | 0.022 | 14.1        |
| M.tubCDC  | 261 | 161 | 0.630 | 0.632 | ns | 0.520 | 0.492 | *** | 0.511 | 0.531 | ns  | 0.506 | 0.521 | 0.034 | 0.022 | 61.2        |
| M. gen    | 14  | 4   | 0.265 | 0.258 | ns | 0.534 | 0.472 | ns  | 0.463 | 0.516 | ns  | 0.503 | 0.490 | 0.082 | 0.011 | 88.2        |
| M. pne    | 35  | 6   | 0.331 | 0.415 | *  | 0.438 | 0.445 | ns  | 0.493 | 0.453 | ns  | 0.442 | 0.473 | 0.041 | 0.064 | 38.7        |
| M.pul     | 52  | 21  | 0.191 | 0.160 | *  | 0.533 | 0.594 | ns  | 0.539 | 0.500 | ns  | 0.564 | 0.520 | 0.072 | 0.066 | 52.2        |



|           |     |     |       |       |     |       |       |     |       |       |     |       |       |       |       |             |
|-----------|-----|-----|-------|-------|-----|-------|-------|-----|-------|-------|-----|-------|-------|-------|-------|-------------|
| N. menA   | 157 | 145 | 0.443 | 0.465 | *   | 0.498 | 0.447 | *** | 0.531 | 0.542 | ns  | 0.473 | 0.536 | 0.052 | 0.046 | 53.3        |
| N. menB   | 174 | 120 | 0.443 | 0.465 | *   | 0.523 | 0.428 | *** | 0.518 | 0.555 | **  | 0.476 | 0.536 | 0.102 | 0.044 | <b>69.9</b> |
| P. mul    | 152 | 89  | 0.331 | 0.341 | ns  | 0.573 | 0.480 | *** | 0.486 | 0.512 | *   | .526  | .499  | .097  | .027  | 78.5        |
| P. aer    | 402 | 313 | 0.635 | 0.665 | *** | 0.495 | 0.447 | *** | 0.494 | 0.544 | *** | 0.471 | 0.519 | 0.069 | 0.035 | <b>66.7</b> |
| P. aby    | 81  | 78  | 0.347 | 0.363 | ns  | 0.496 | 0.512 | ns  | 0.451 | 0.485 | *   | 0.504 | 0.468 | 0.038 | 0.032 | 53.8        |
| P. hor    | 73  | 53  | 0.318 | 0.358 | **  | 0.494 | 0.512 | ns  | 0.452 | 0.478 | ns  | 0.503 | 0.465 | 0.032 | 0.035 | 47.4        |
| R. pro    | 50  | 27  | 0.232 | 0.235 | ns  | 0.547 | 0.503 | ns  | 0.493 | 0.533 | *   | 0.525 | 0.513 | 0.059 | 0.028 | 67.8        |
| S.aur     | 140 | 34  | 0.278 | 0.282 | ns  | 0.653 | 0.543 | *** | 0.548 | 0.519 | ns  | 0.598 | 0.534 | 0.114 | 0.104 | 52.3        |
| S.aurN315 | 128 | 30  | 0.279 | 0.287 | ns  | 0.658 | 0.562 | *** | 0.549 | 0.542 | ns  | 0.610 | 0.546 | 0.096 | 0.119 | 44.7        |
| S.pyo     | 137 | 30  | 0.327 | 0.331 | ns  | 0.612 | 0.540 | **  | 0.555 | 0.494 | *** | 0.576 | 0.524 | 0.094 | 0.080 | <b>54.2</b> |
| T. aci    | 85  | 72  | 0.331 | 0.345 | ns  | 0.523 | 0.468 | **  | 0.515 | 0.483 | *   | 0.496 | 0.499 | 0.064 | 0.005 | 93.2        |
| T. mar    | 61  | 53  | 0.437 | 0.419 | ns  | 0.593 | 0.585 | ns  | 0.511 | 0.519 | ns  | 0.589 | 0.515 | 0.011 | 0.090 | 11.1        |
| T. pal    | 75  | 64  | 0.541 | 0.557 | ns  | 0.634 | 0.574 | **  | 0.416 | 0.447 | ns  | 0.604 | 0.431 | 0.068 | 0.125 | 35.2        |
| U. ure    | 70  | 18  | 0.174 | 0.172 | ns  | 0.610 | 0.631 | ns  | 0.503 | 0.523 | ns  | 0.621 | 0.513 | 0.029 | 0.121 | 19.3        |
| V. cho1   | 174 | 102 | 0.420 | 0.420 | ns  | 0.529 | 0.468 | *** | 0.485 | 0.501 | ns  | 0.499 | 0.493 | 0.063 | 0.007 | 89.8        |

|         |     |     |       |       |    |       |       |     |       |       |     |       |       |       |       |             |
|---------|-----|-----|-------|-------|----|-------|-------|-----|-------|-------|-----|-------|-------|-------|-------|-------------|
| V. cho2 | 51  | 31  | 0.459 | 0.431 | ns | 0.509 | 0.455 | **  | 0.526 | 0.506 | ns  | 0.482 | 0.516 | 0.058 | 0.024 | 70.5        |
| X. fas  | 148 | 111 | 0.483 | 0.515 | ** | 0.511 | 0.406 | *** | 0.437 | 0.548 | *** | 0.459 | 0.493 | 0.153 | 0.042 | <b>78.4</b> |



**Table 4. Base composition in small intergenic regions (from 50 to 100 bp) among co-oriented genes..** Indices are defined in the material and method section. #lead and #lag are the number of regions in the leading and the lagging strand. The significance level (Sig.) for a difference between the two groups are: ns (not significant,  $p > 0.05$ ); \* ( $0.01 < p < 0.05$ ); \*\* ( $0.001 < p < 0.01$ ); \*\*\* ( $p < 0.001$ ). The contribution in percent of replication-associated effects to PR2 deviations ( $B_l$  %) is given in **bold** when both differences  $x_l - x_2$  and  $y_l - y_2$  are highly significant ( $p < 0.01$ ). When a difference is significant between the two groups a red color outlines the **highest** value and a blue color the lowest value.

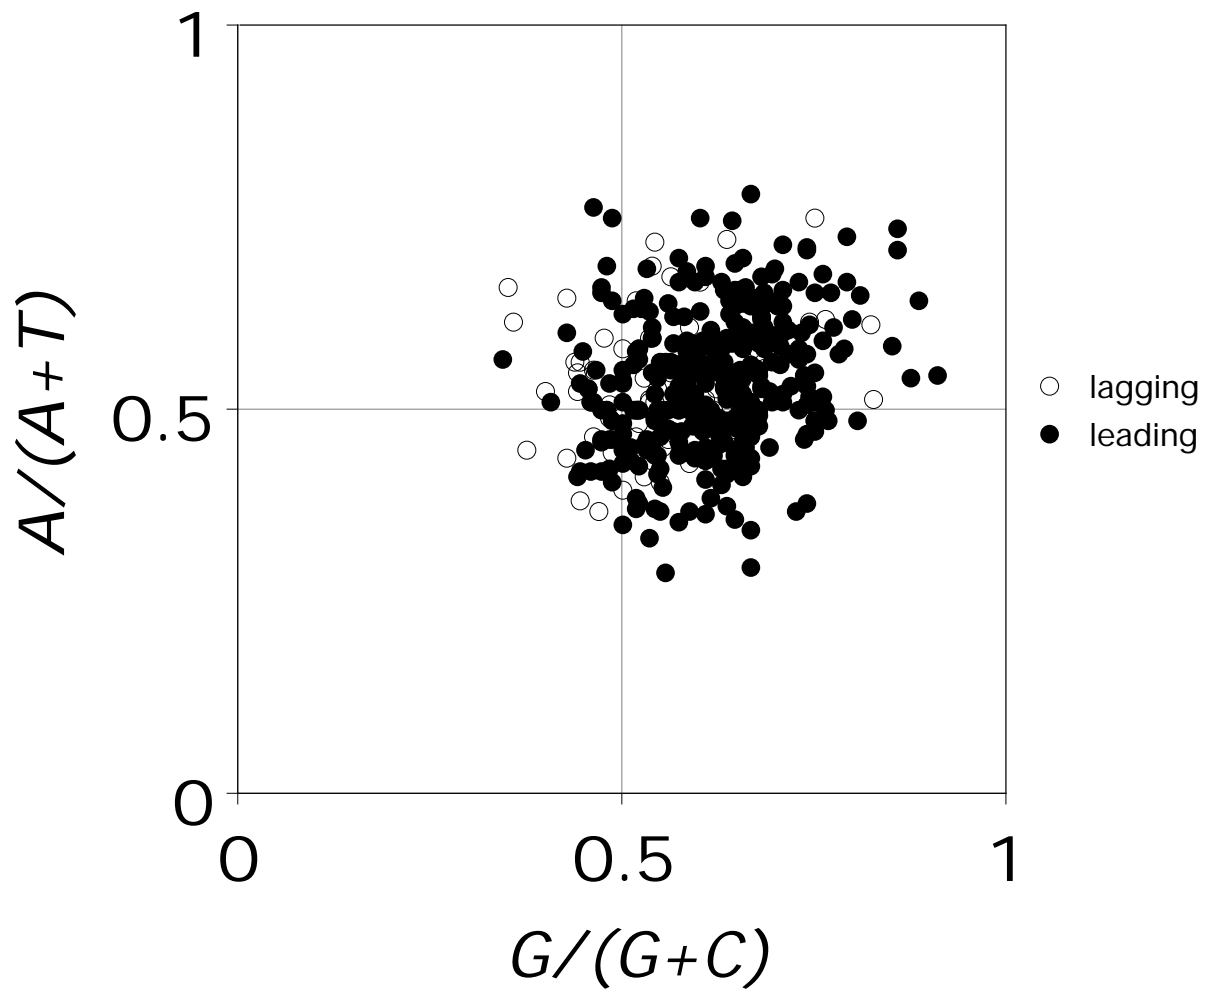

*Bacillus halodurans*

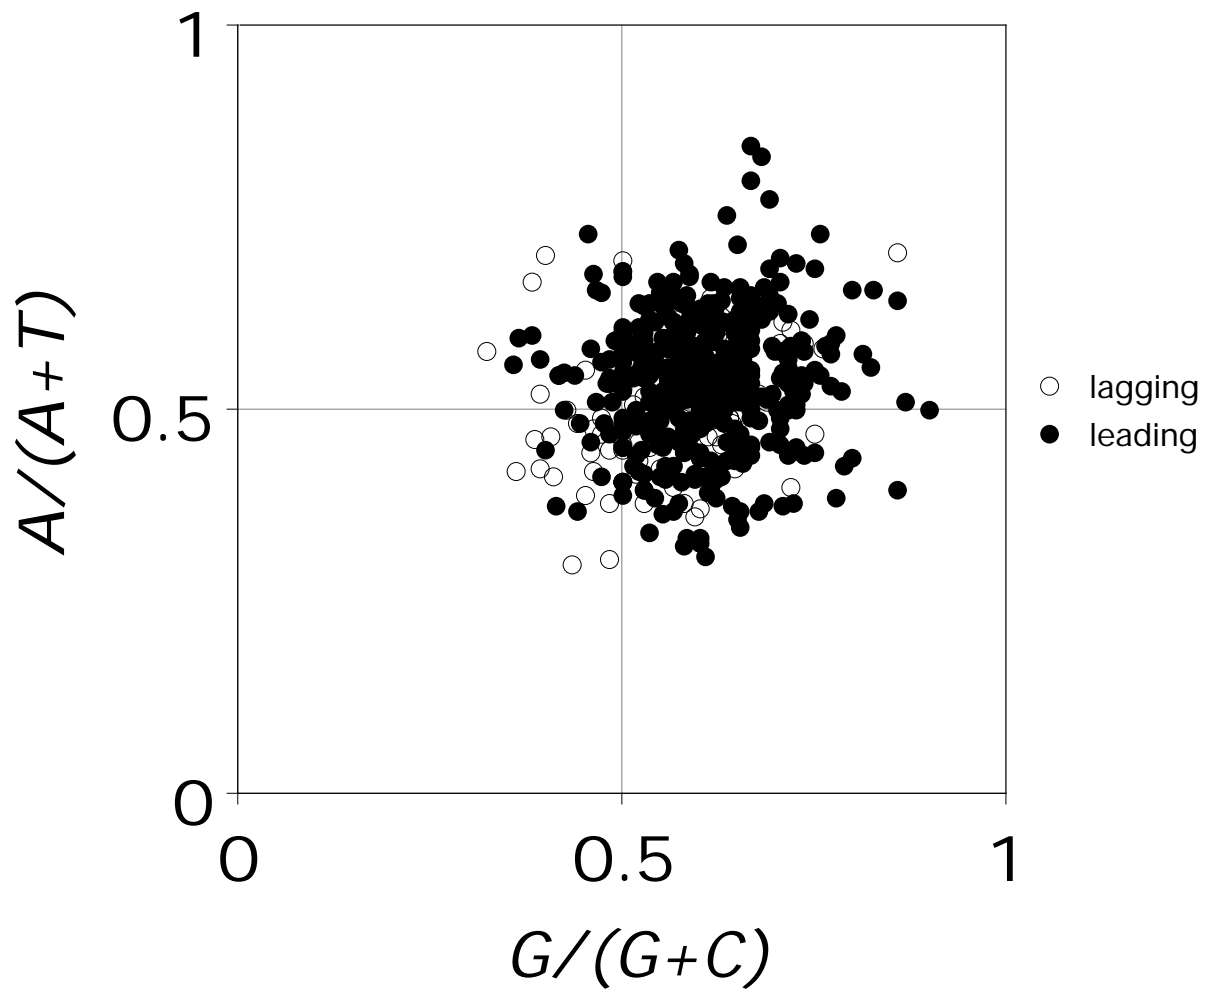

*Bacillus subtilis*

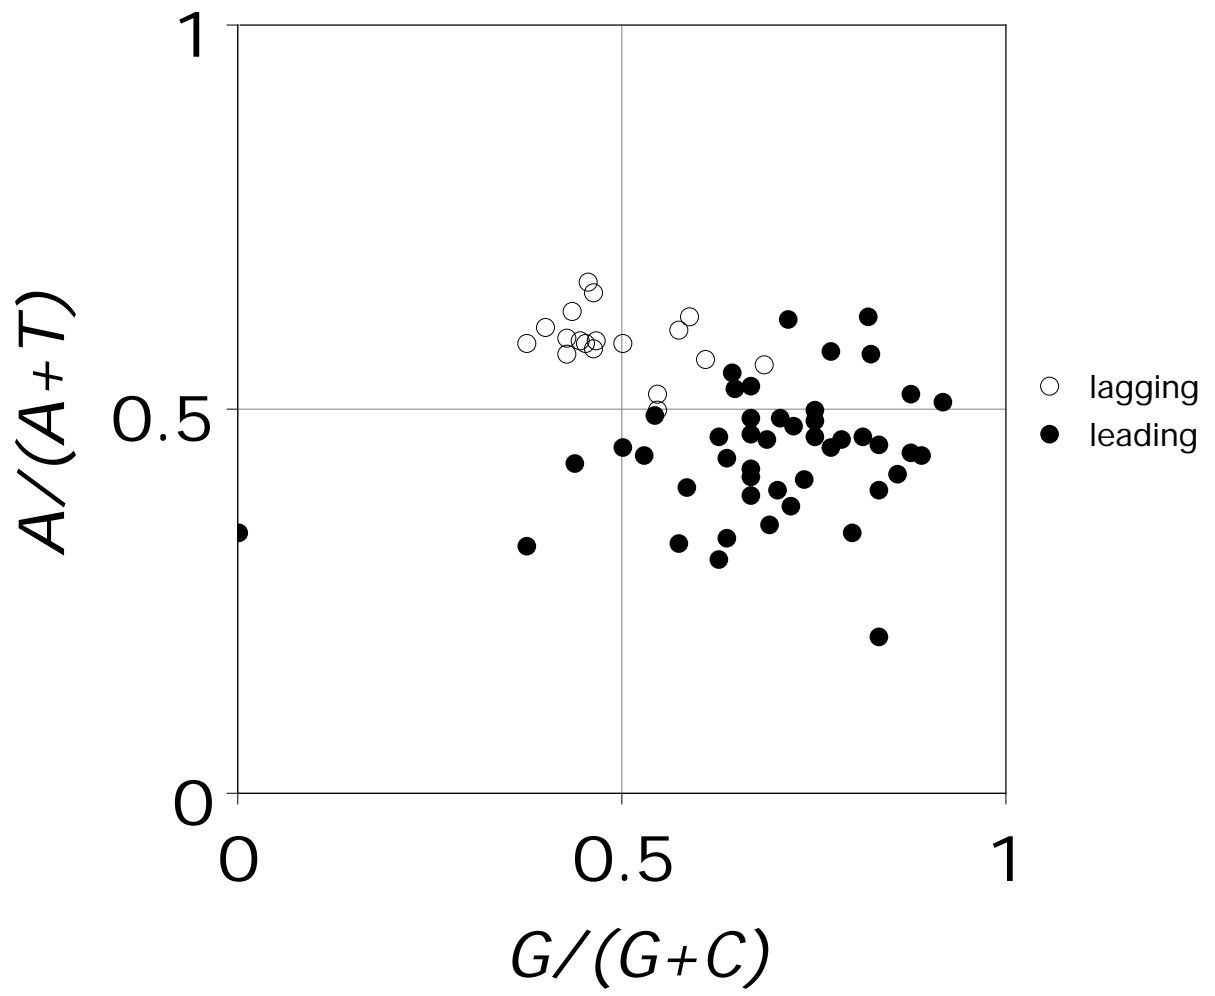

*Borrelia burgdorferi*

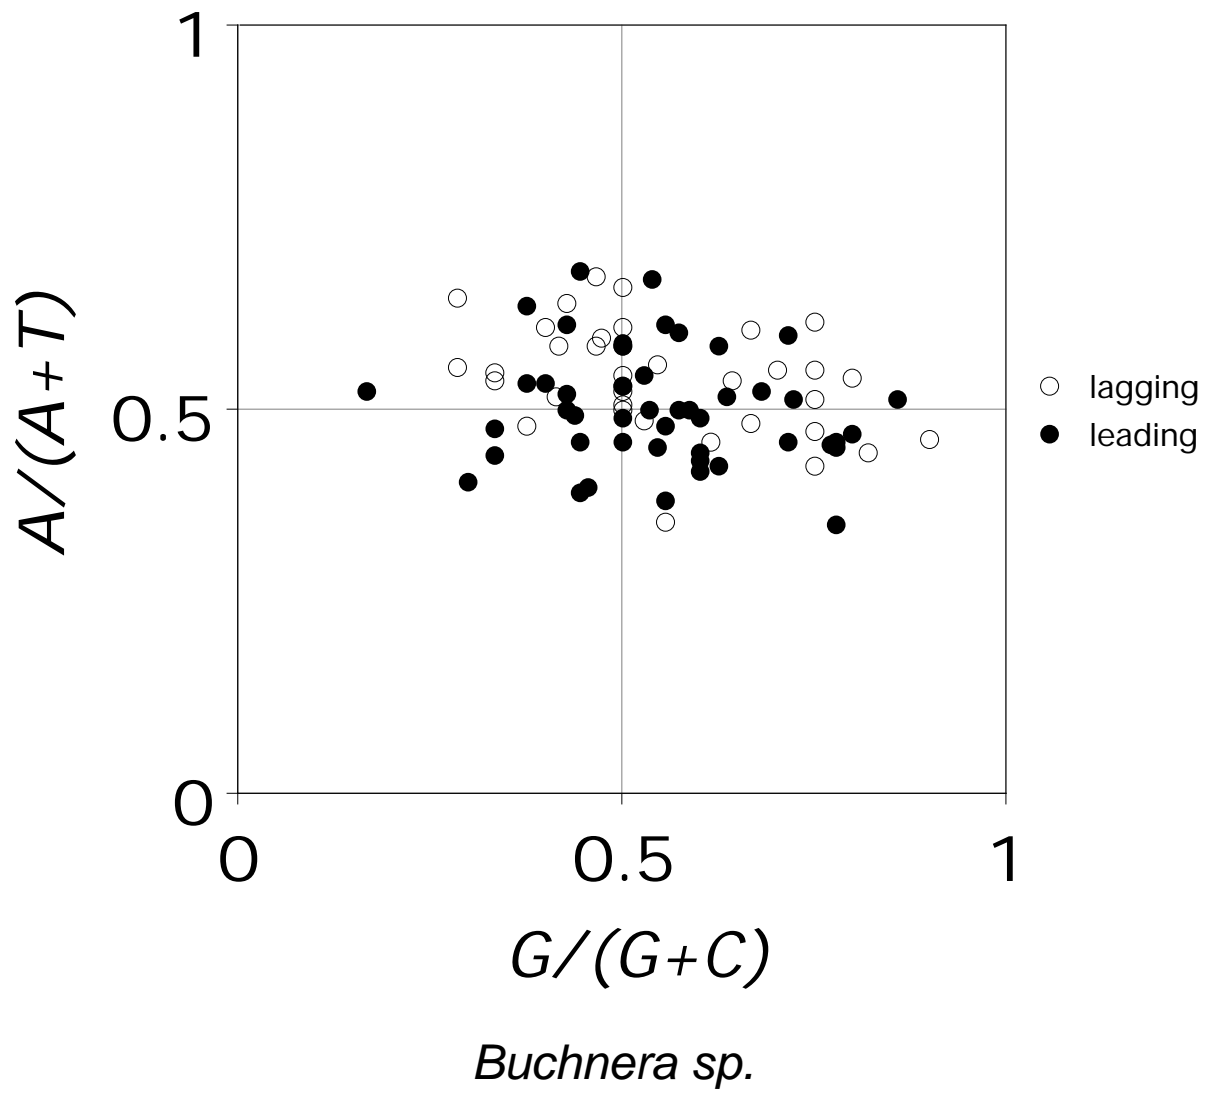

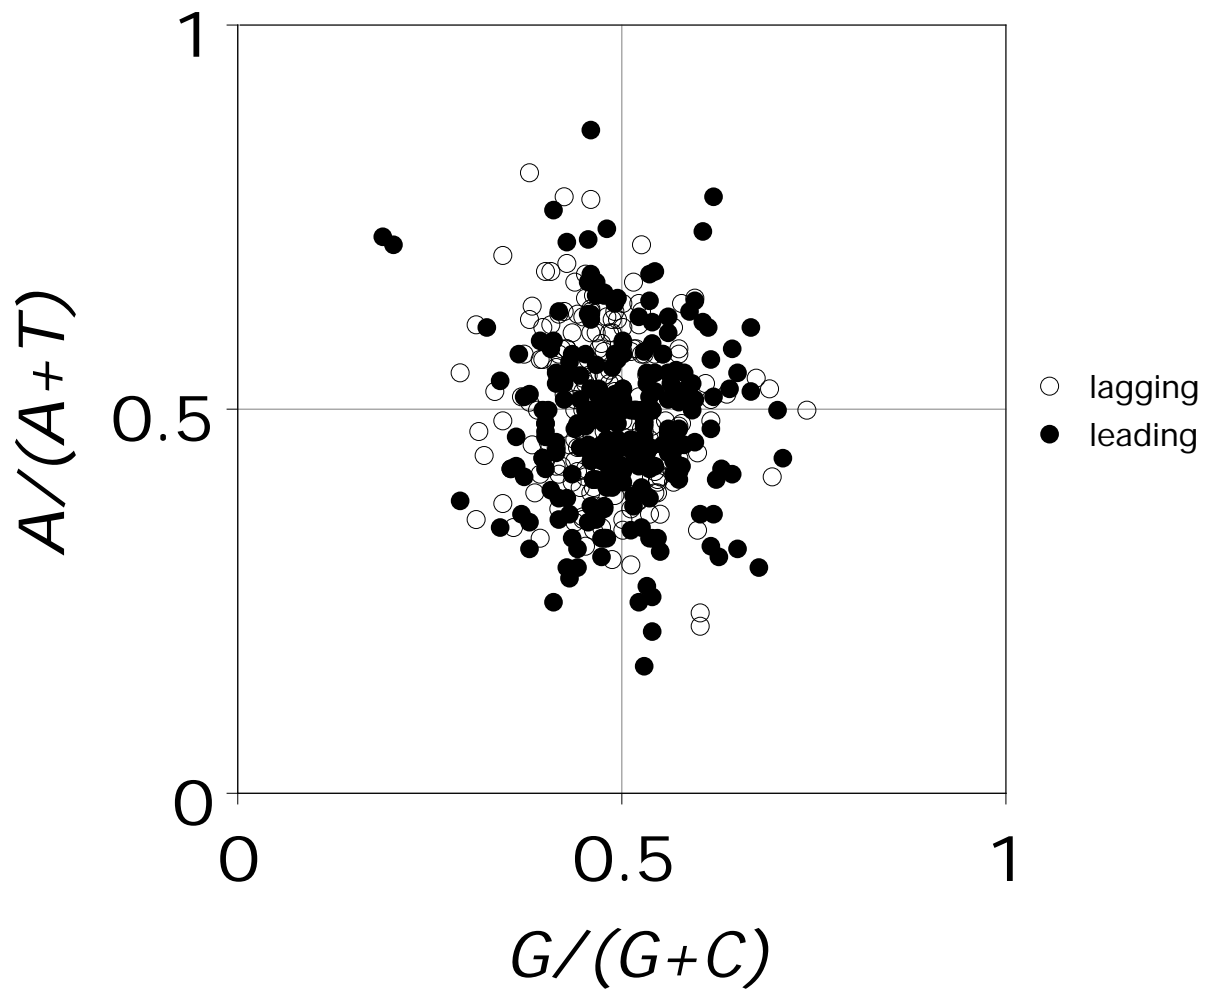

*Caulobacter crescentus*

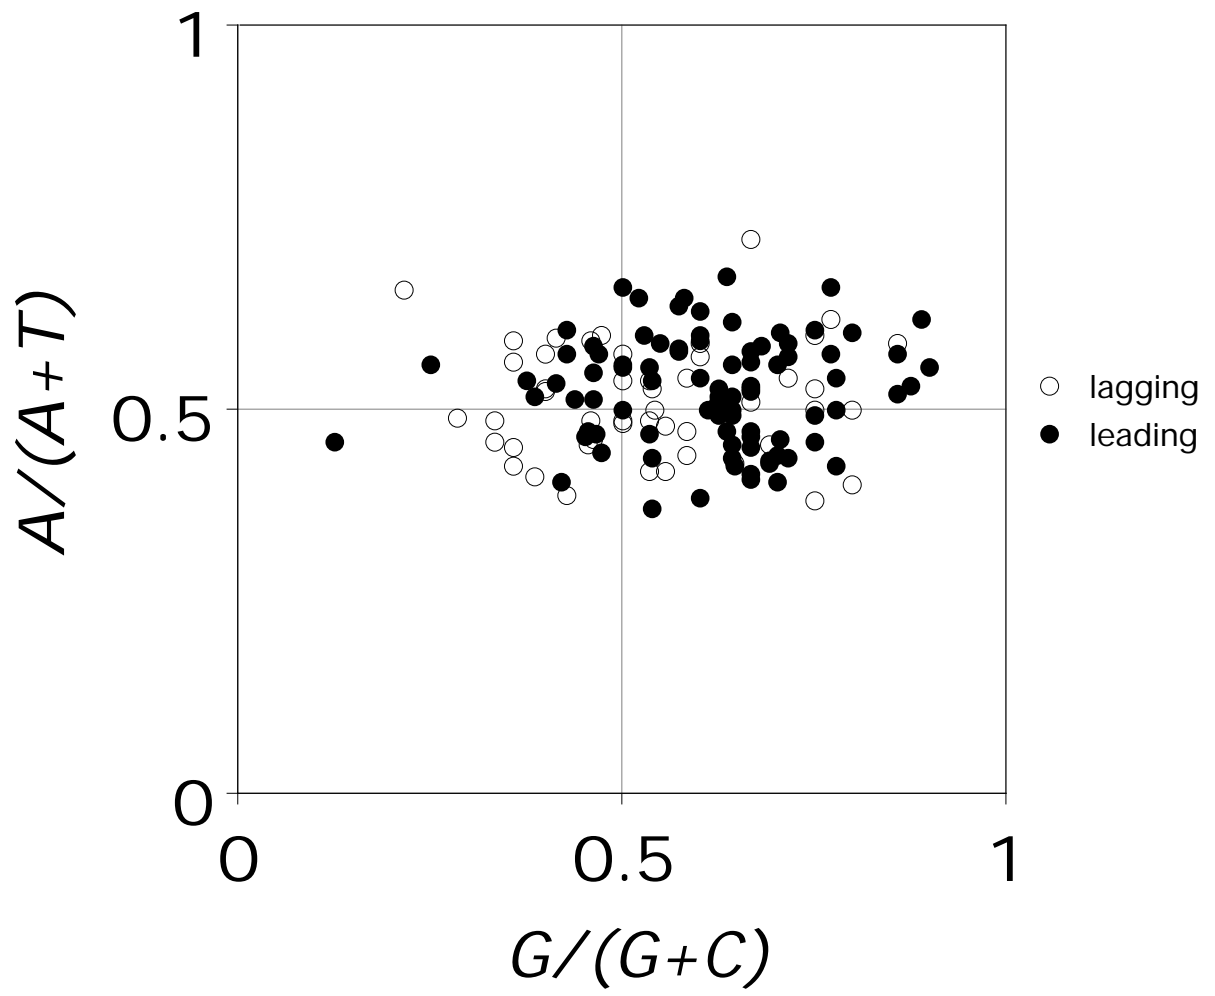

*Campylobacter jejuni*



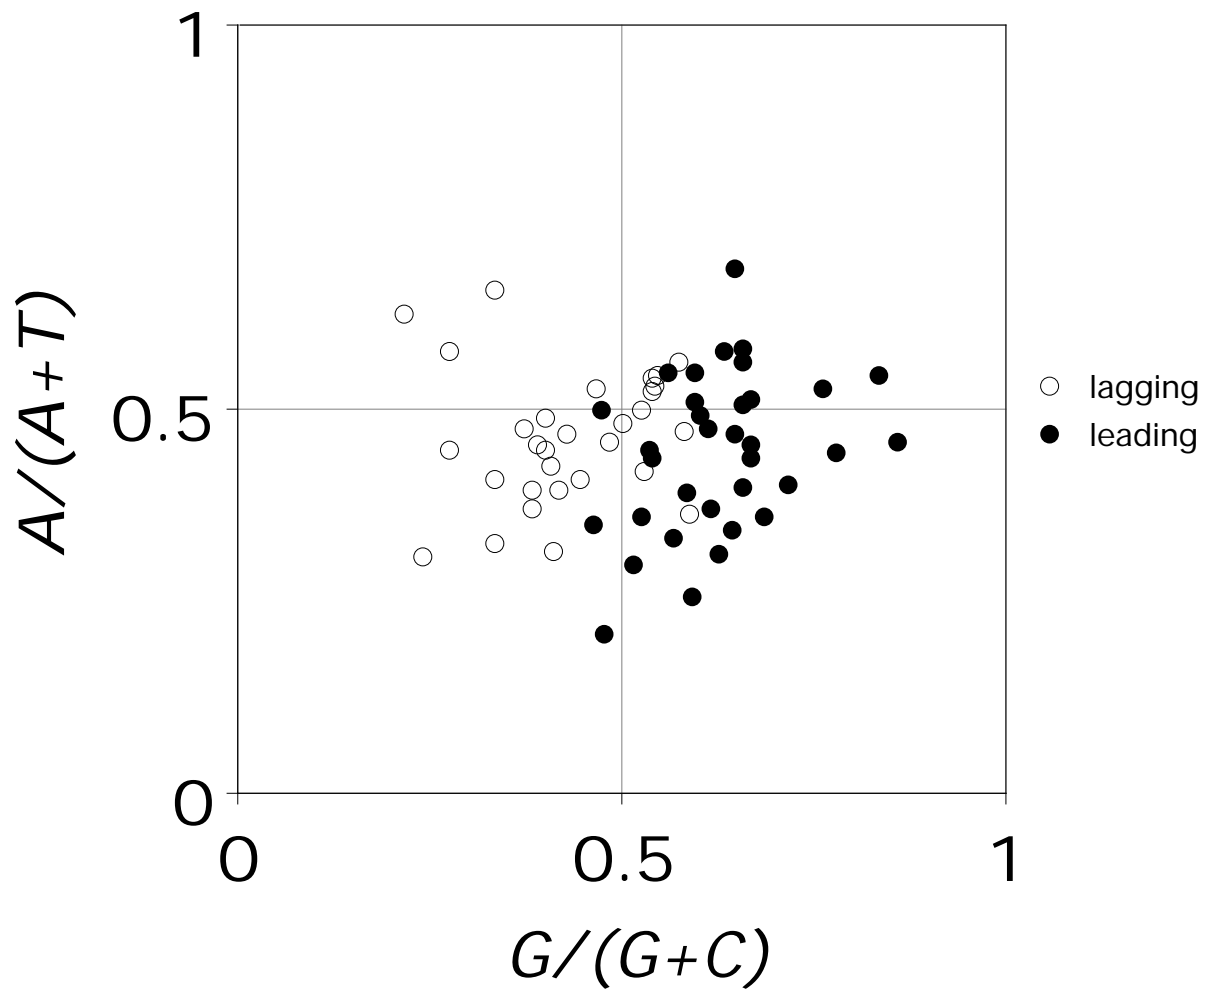

*Chlamydia muridarum*

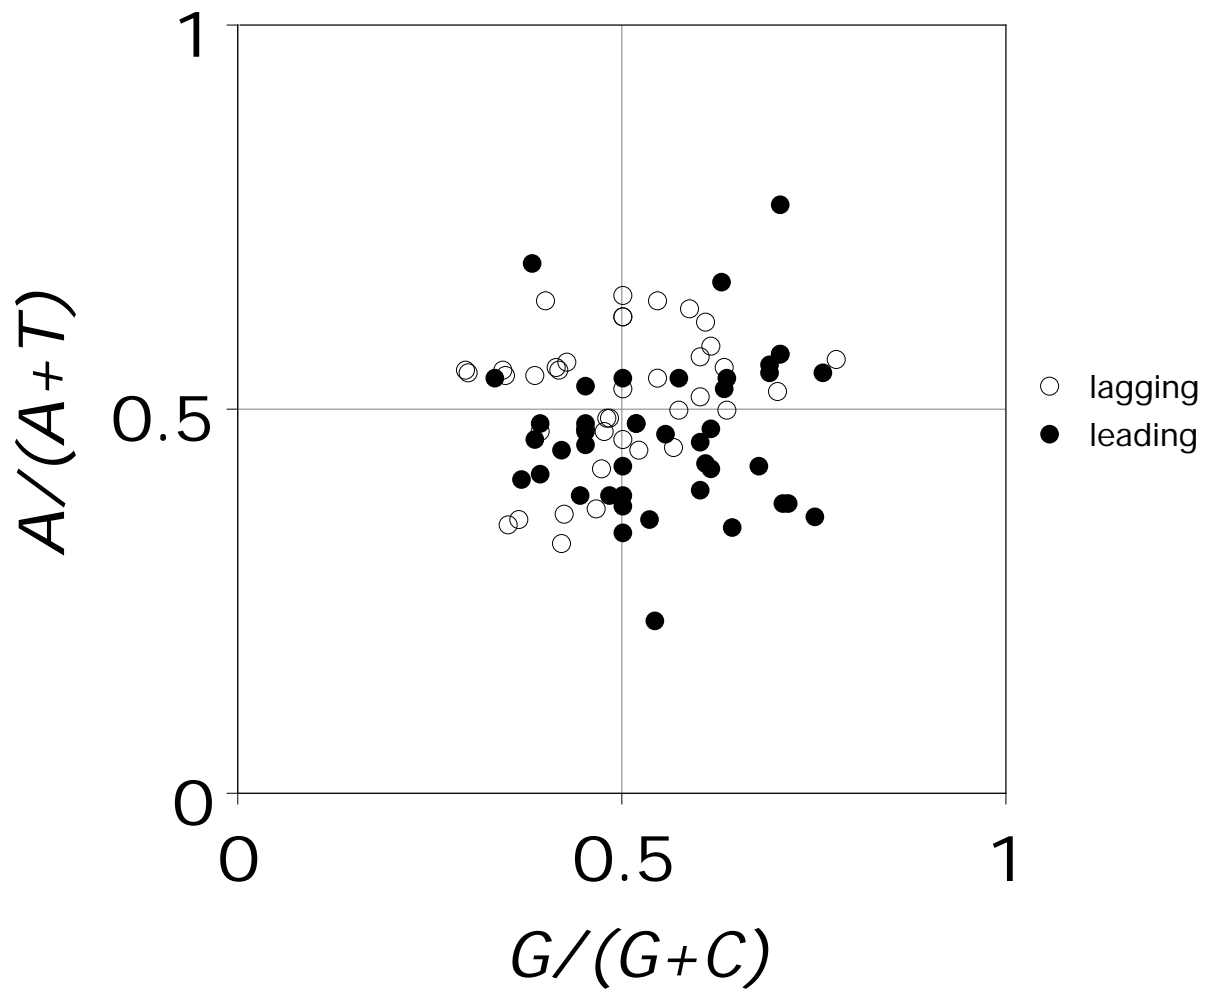

*Chlamydophila pneumoniae* CWL029

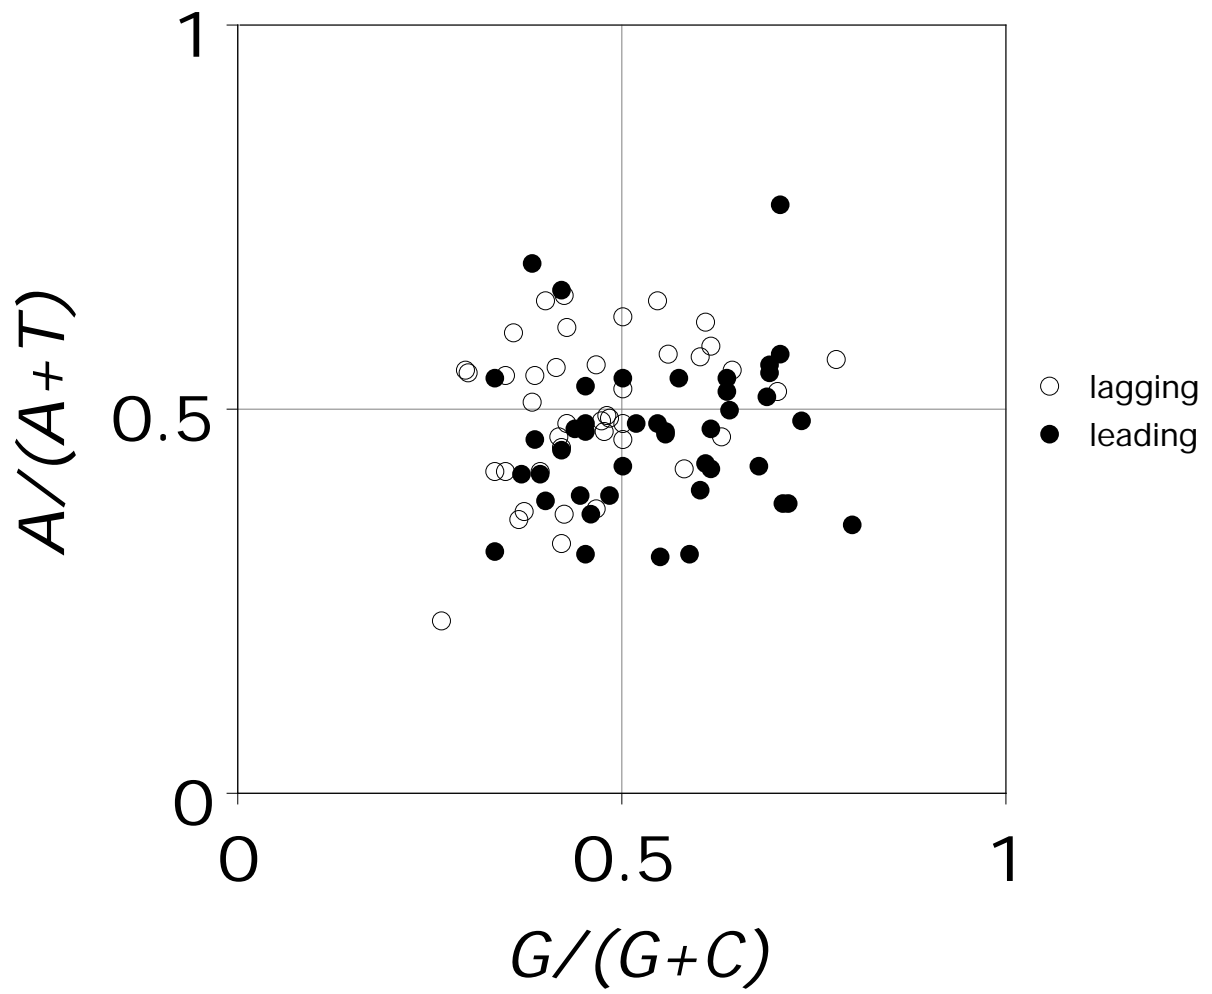

*Chlamydomophila pneumoniae* AR39

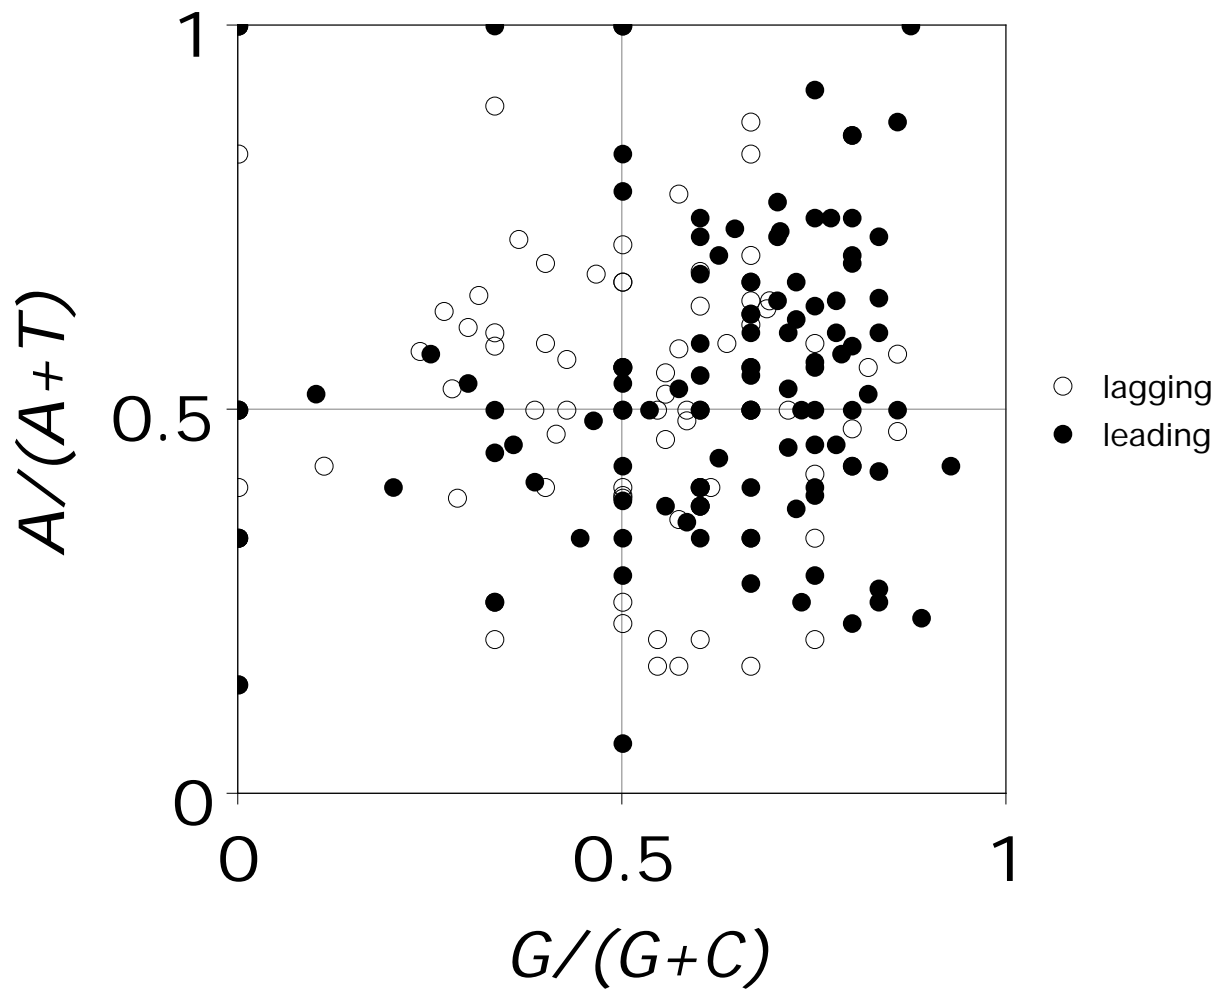

*Chlamydomonas reinhardtii* J138

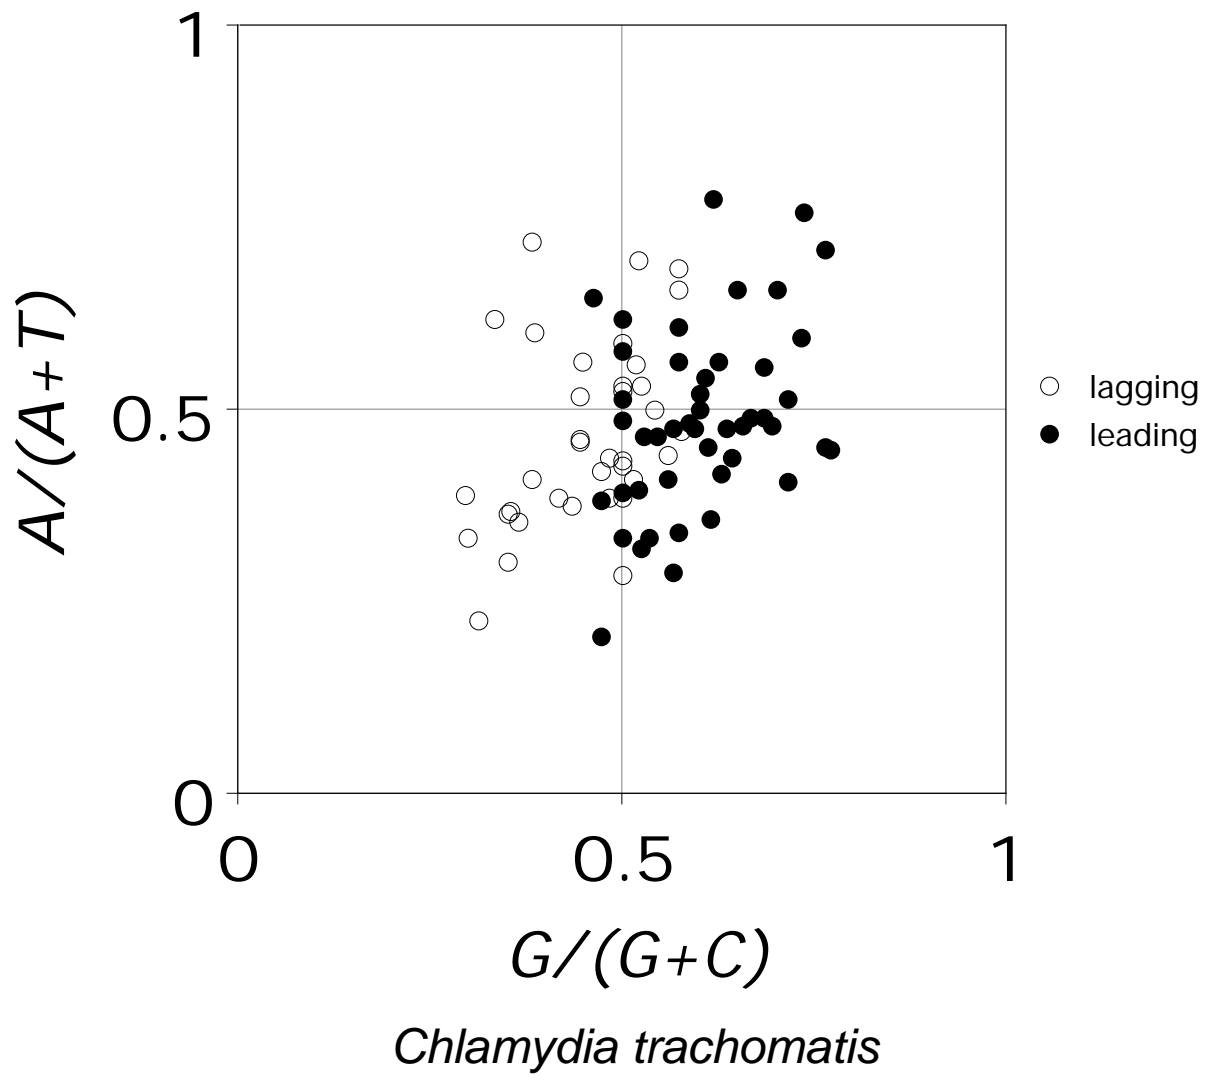

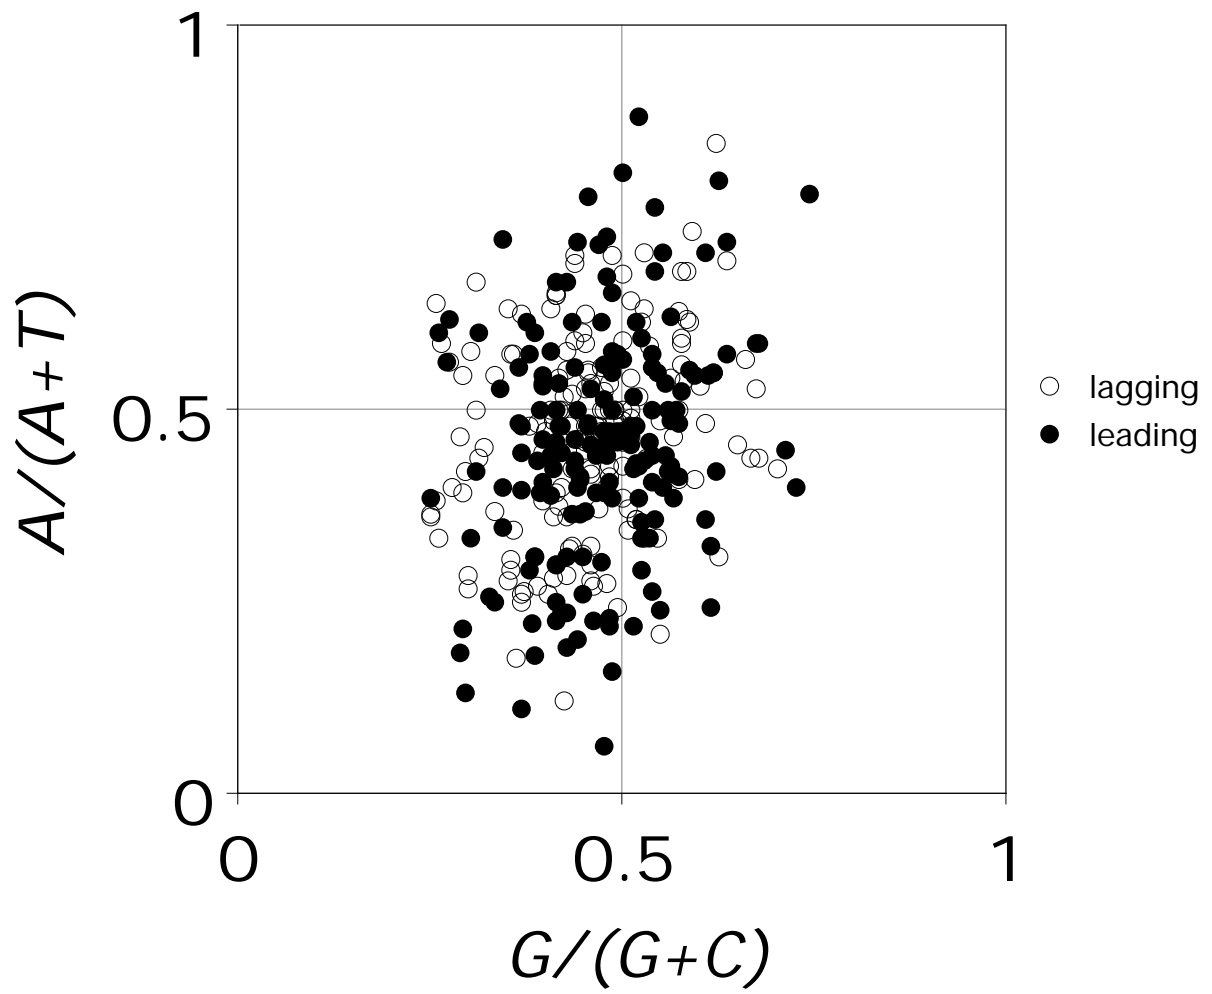

*Deinococcus radiodurans* chromosome 1

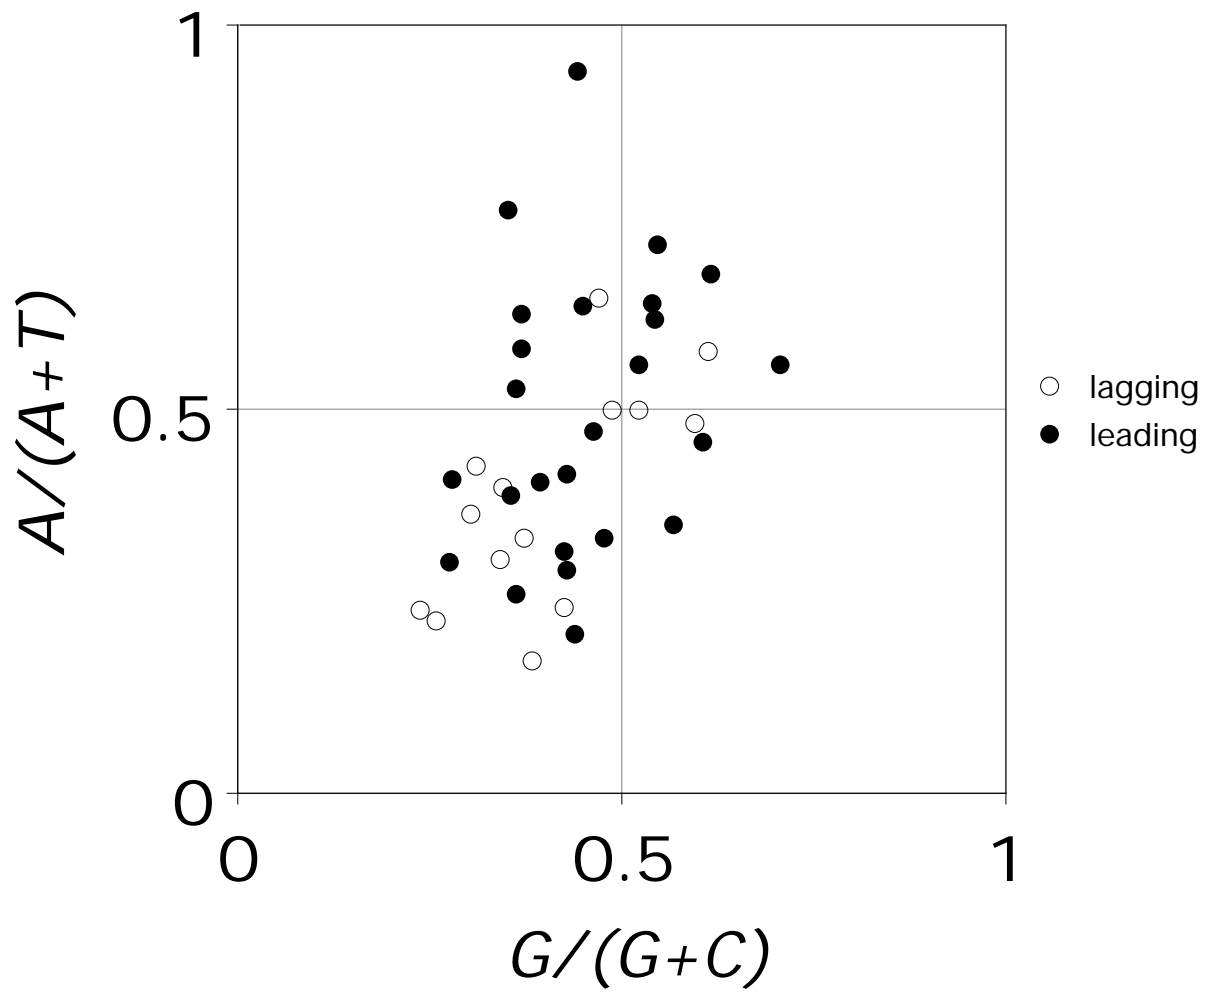

*Deinococcus radiodurans* chromosome 2

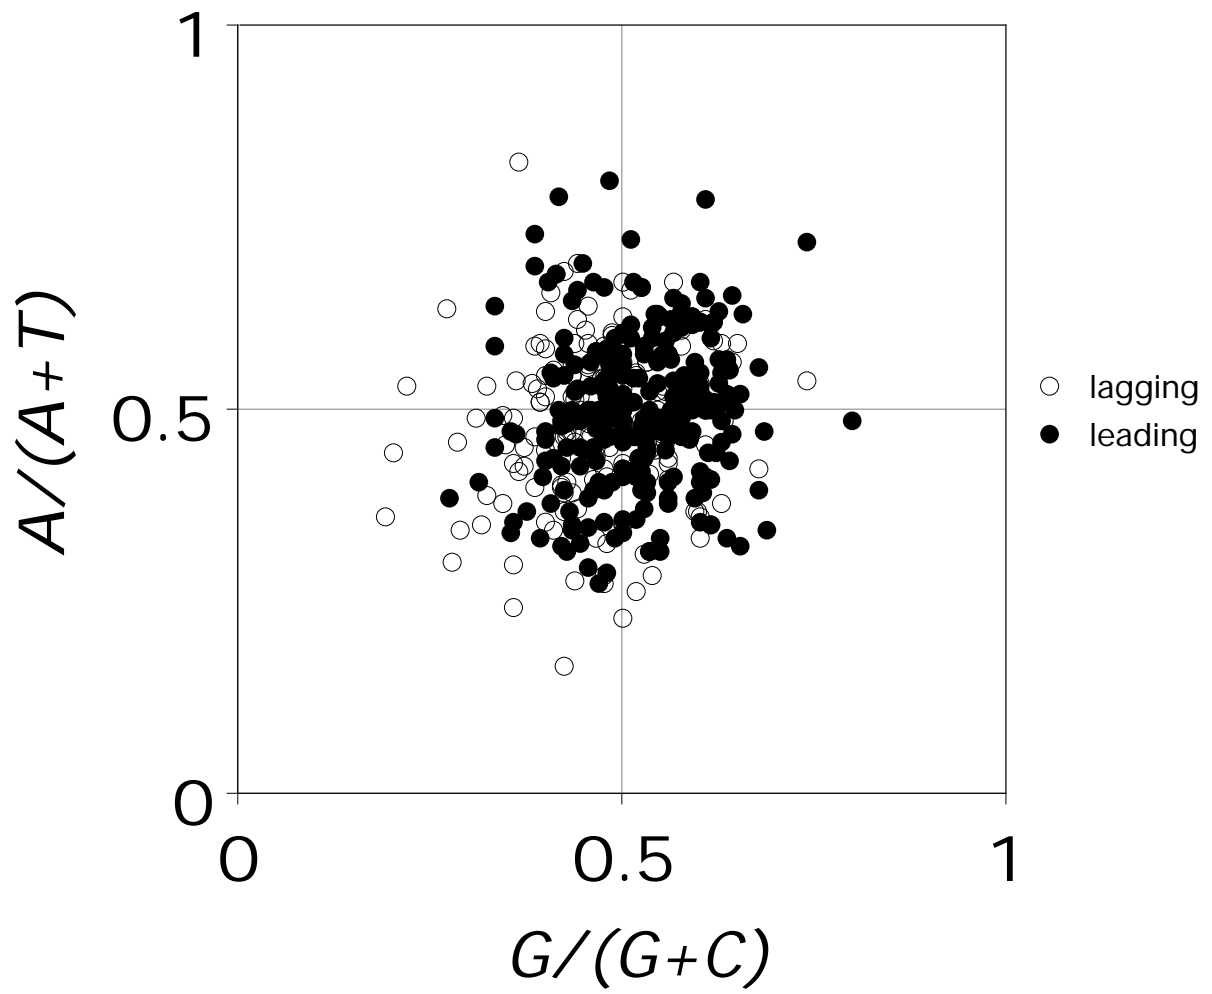

*Escherichia coli* K-12



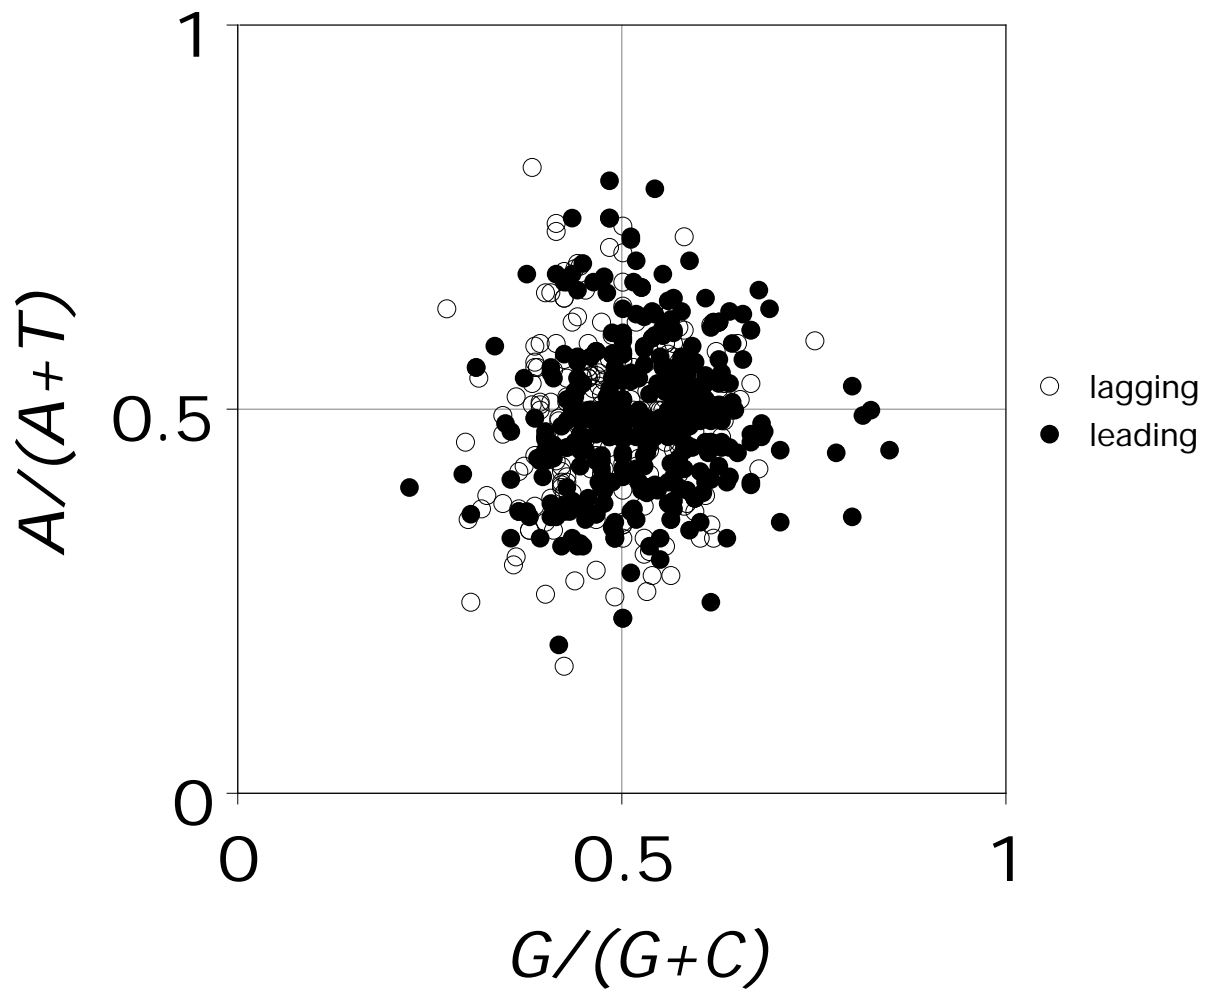

*Escherichia coli* EDL933

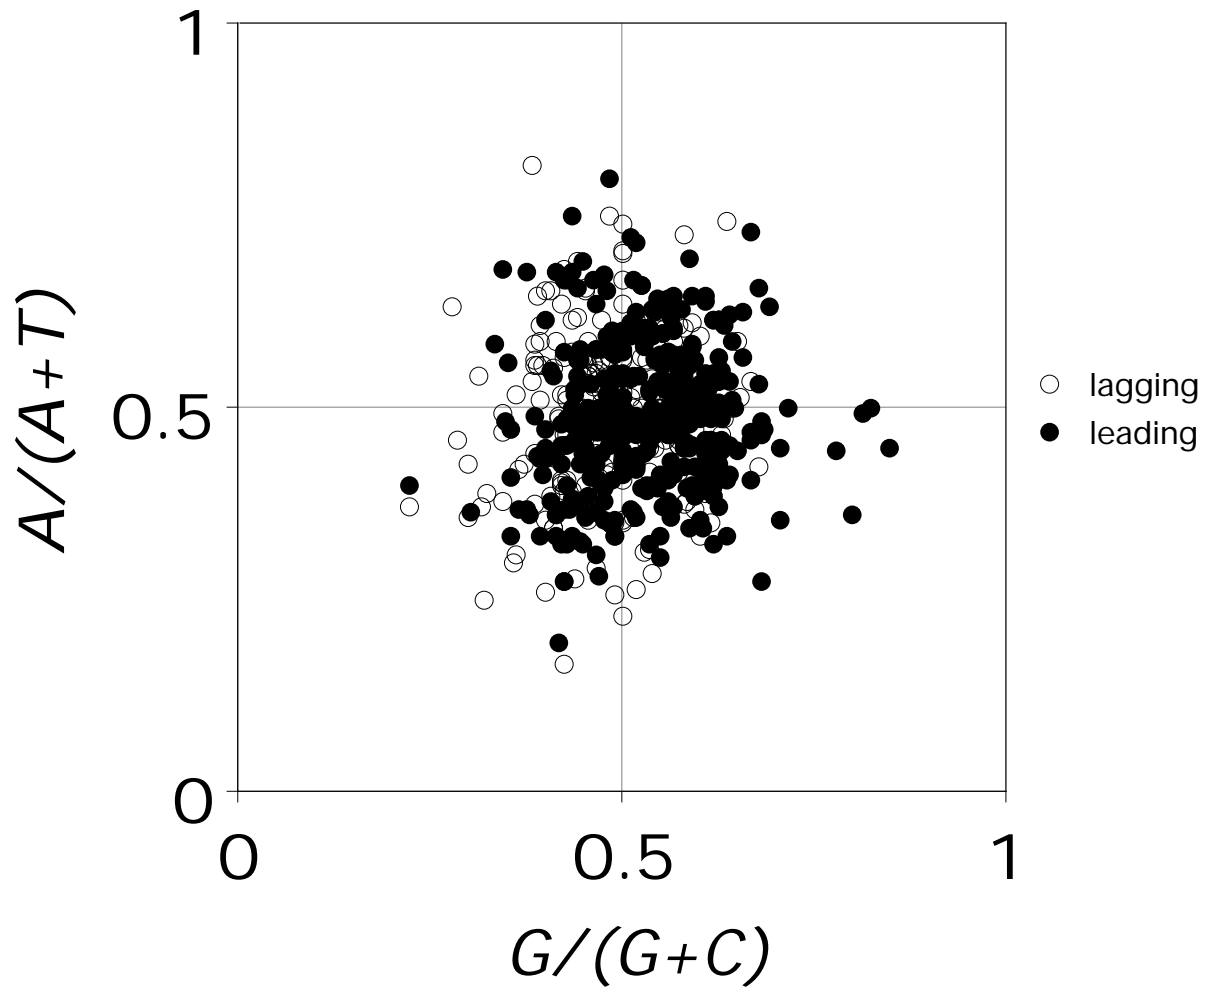

*Escherichia coli* RIMD 0509952

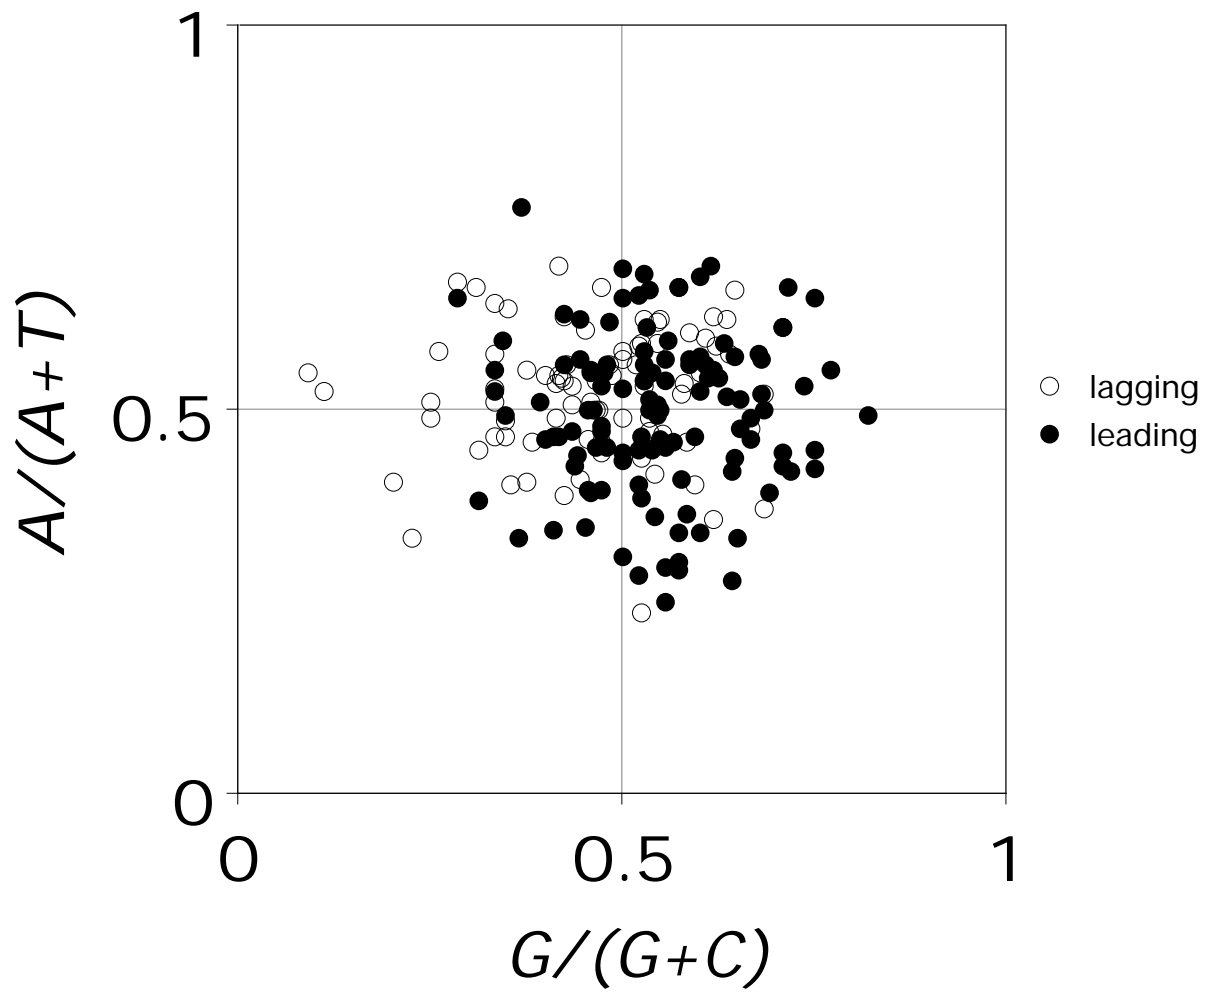

*Haemophilus influenzae*

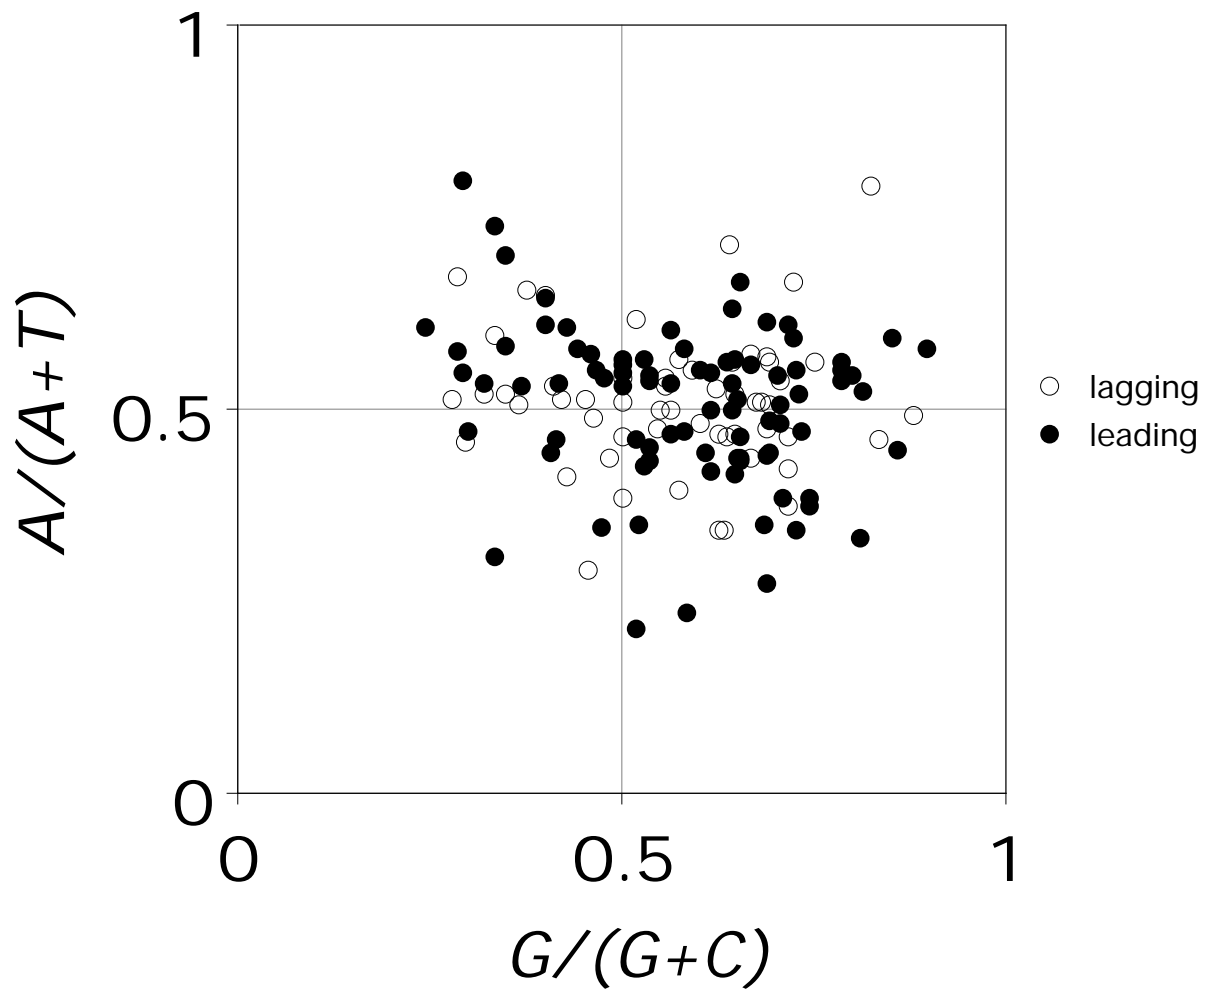

*Helicobacter pylori* 26695

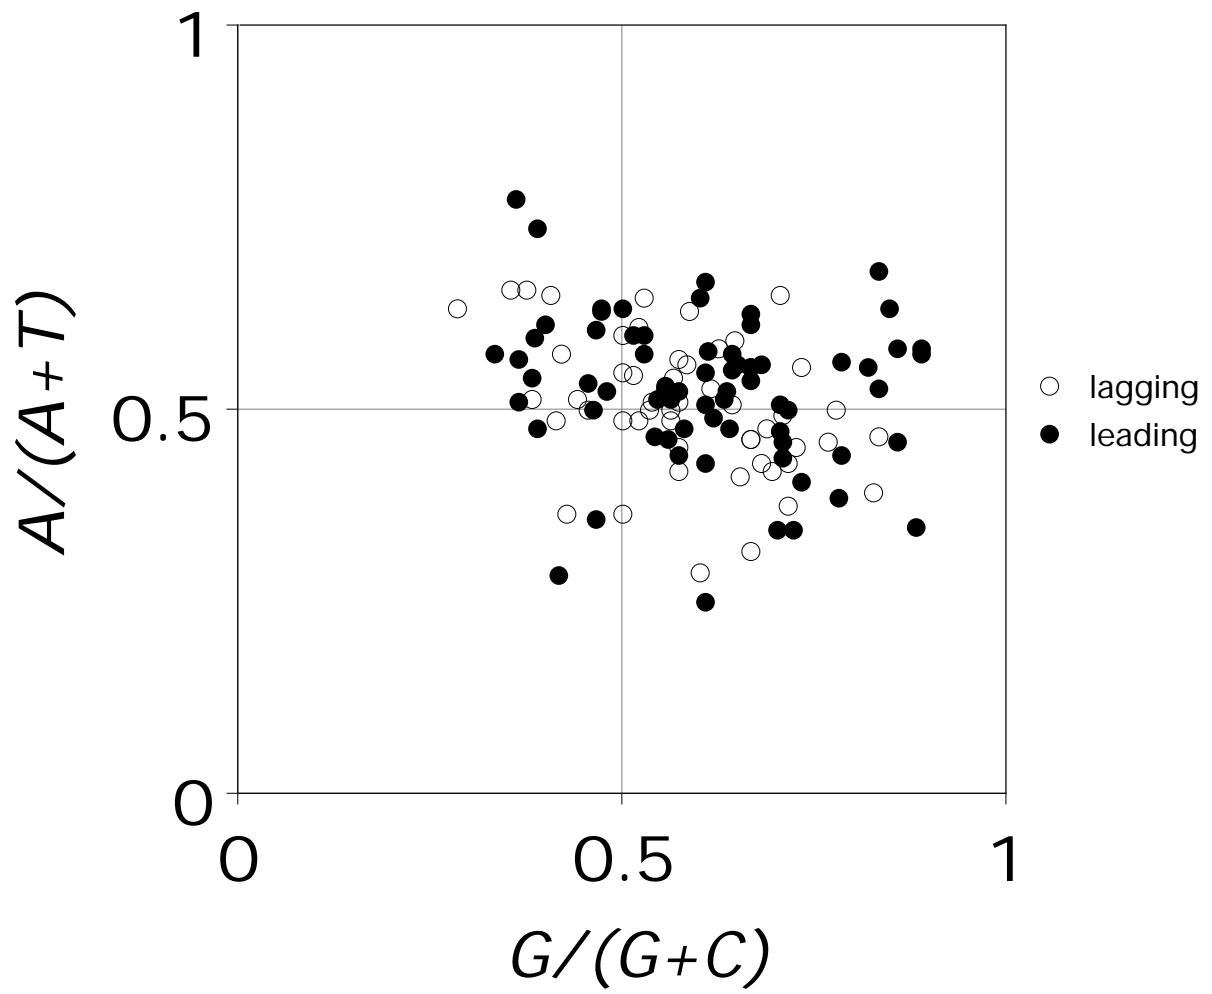

*Helicobacter pylori* J99

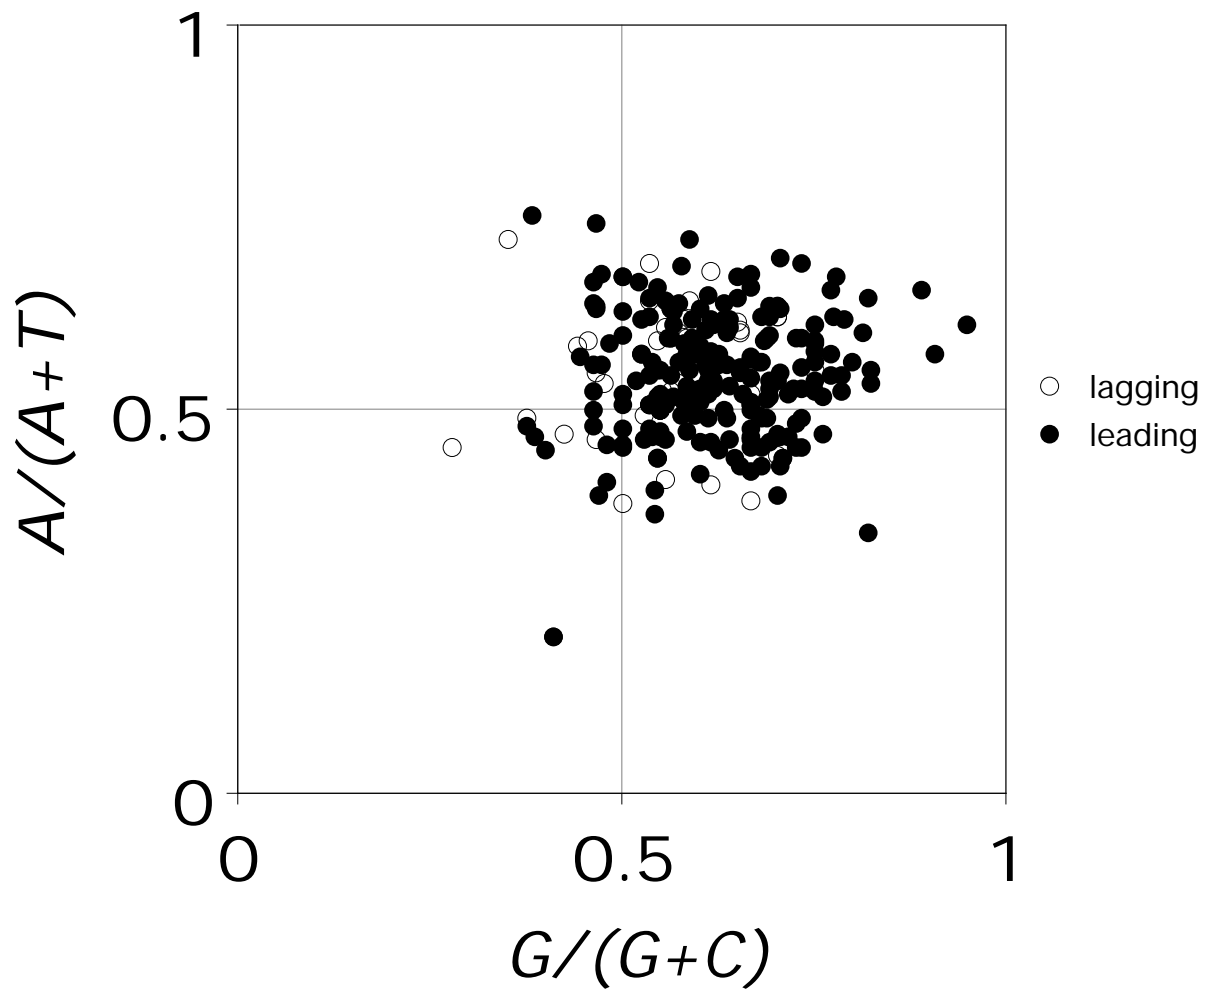

*Lactococcus lactis*

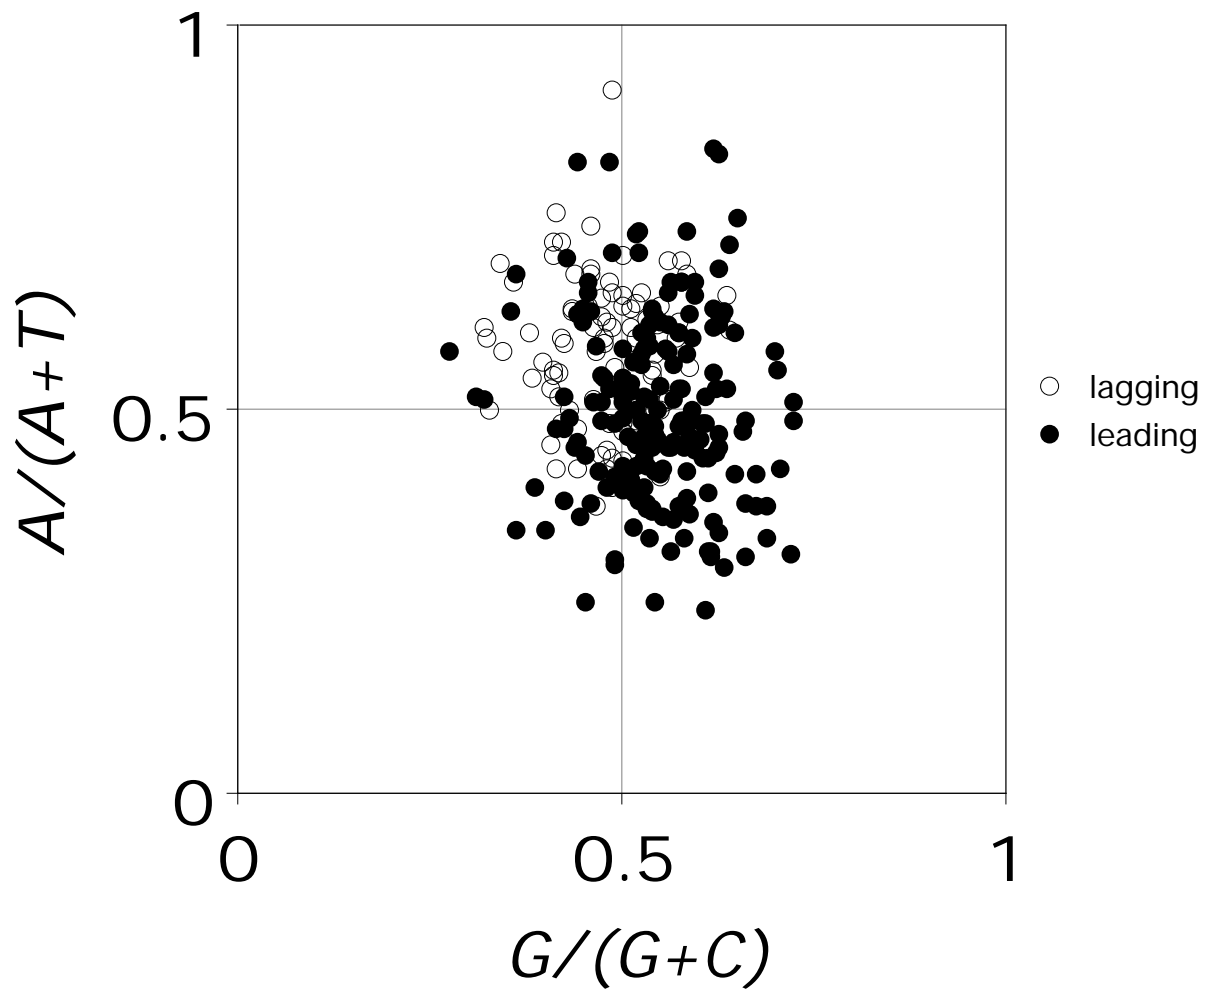

*Mycobacterium leprae*

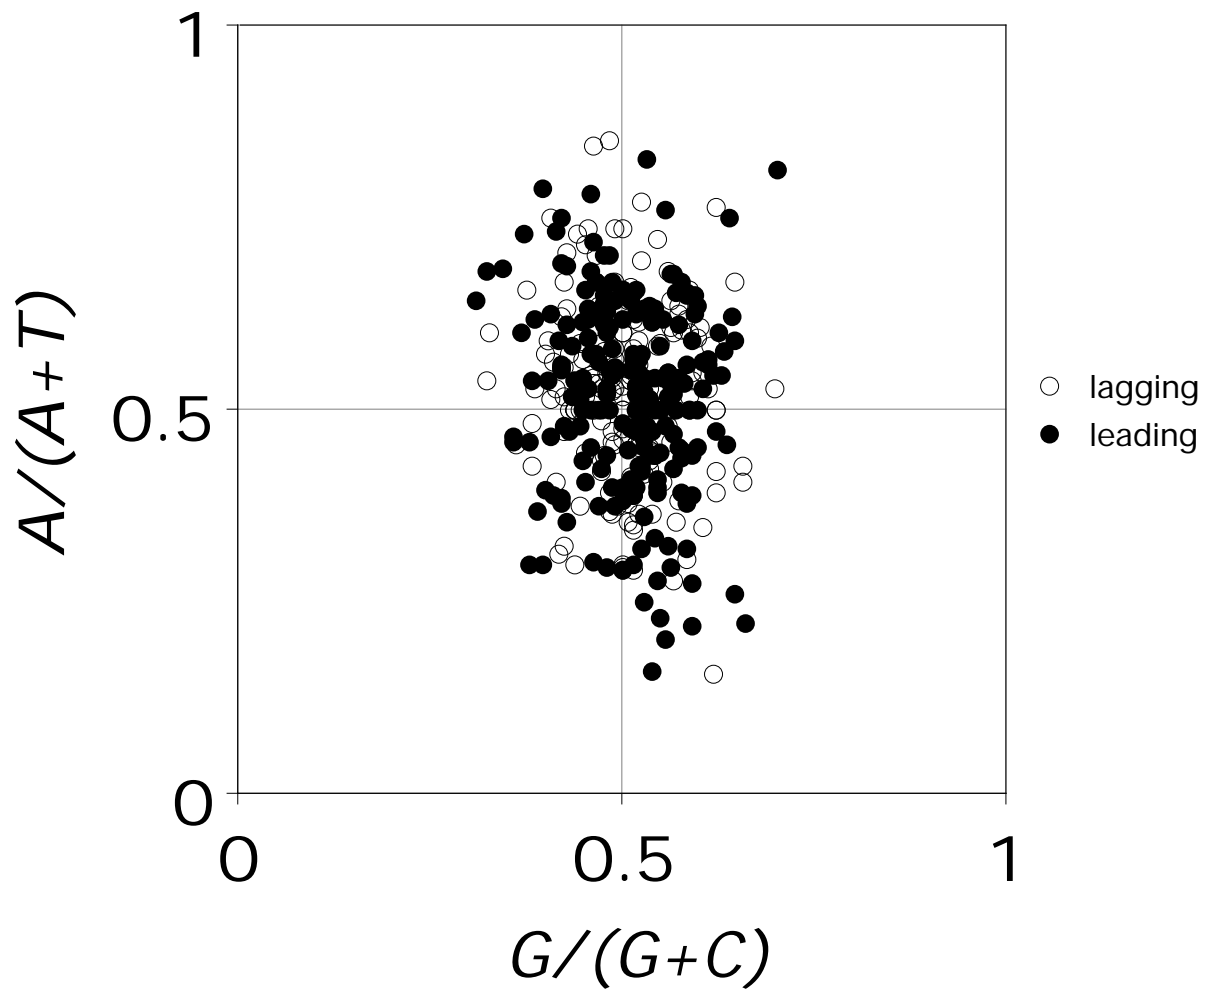

*Mycobacterium tuberculosis* H37Rv



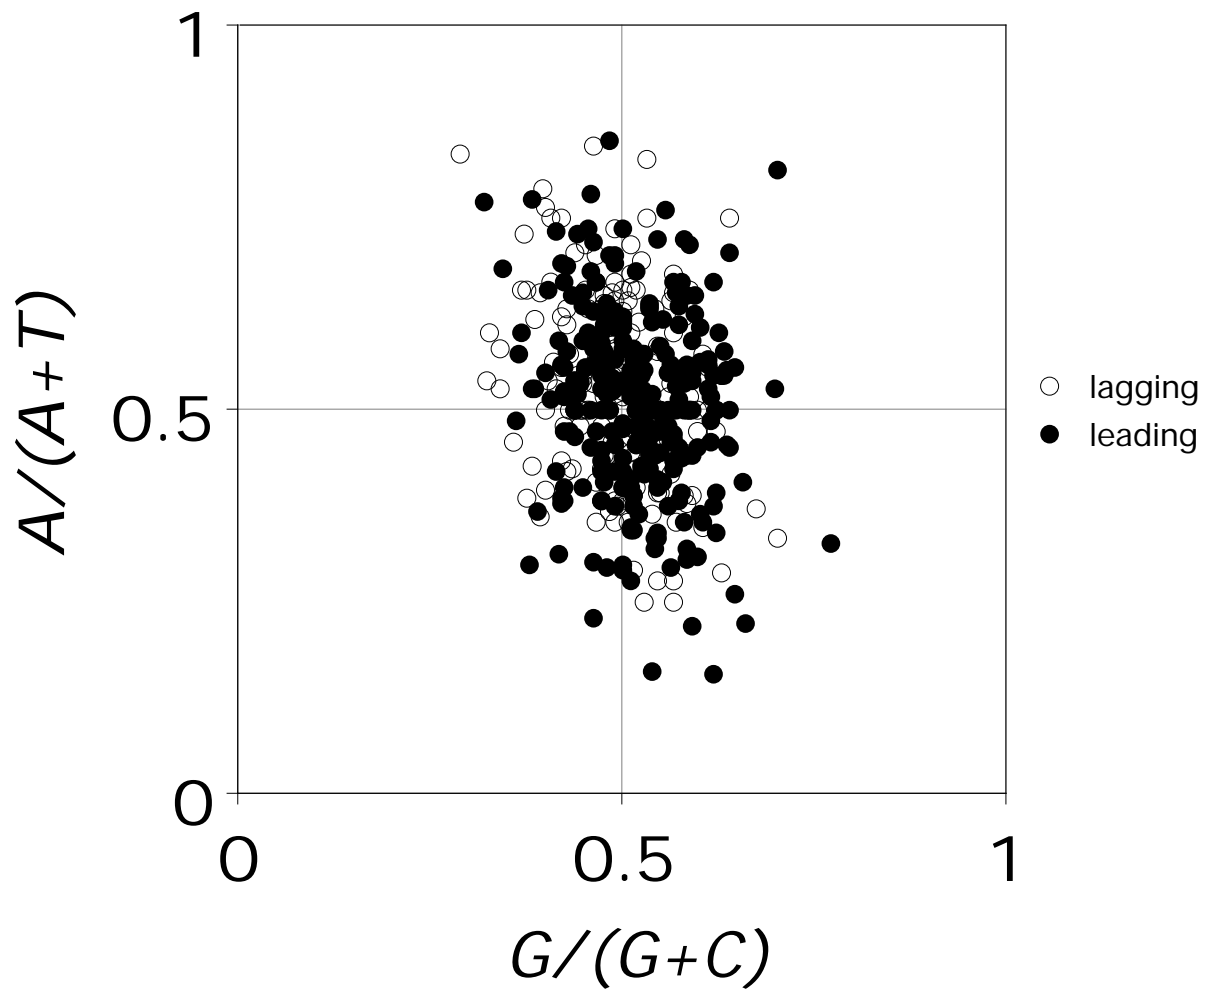

*Mycobacterium tuberculosis* CDC1551

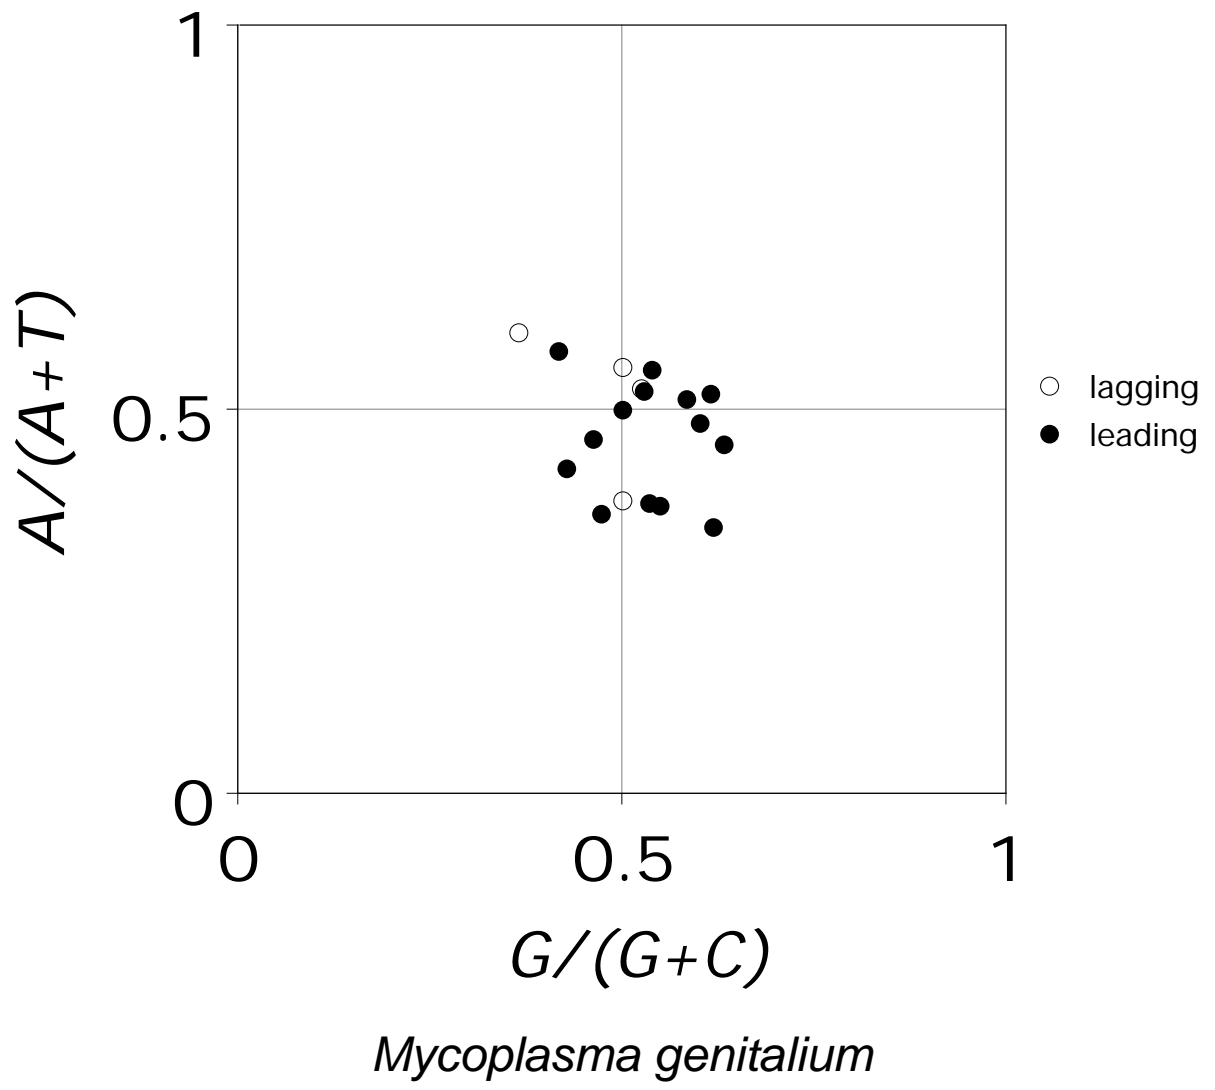

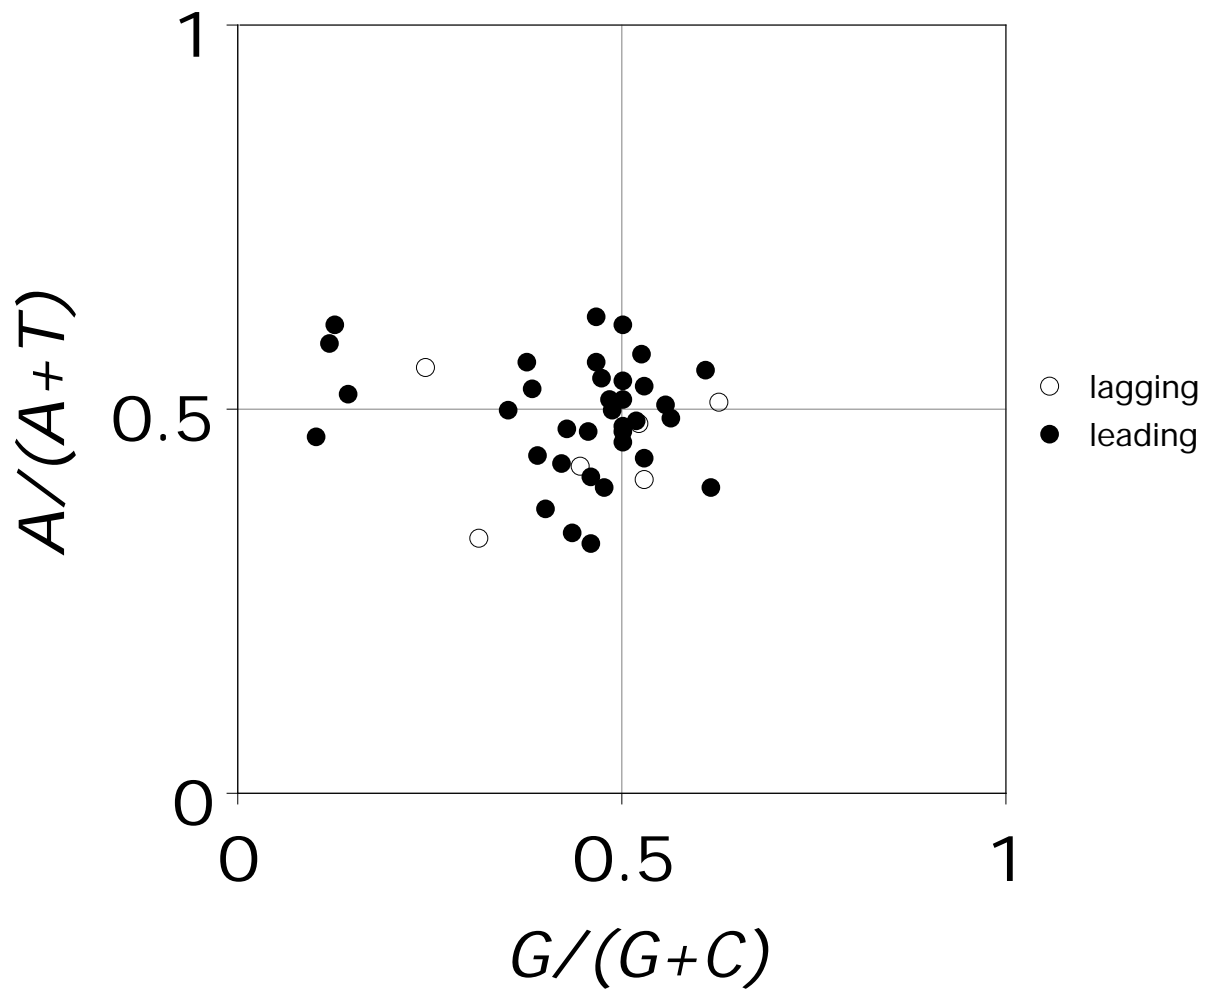

*Mycoplasma pneumoniae*

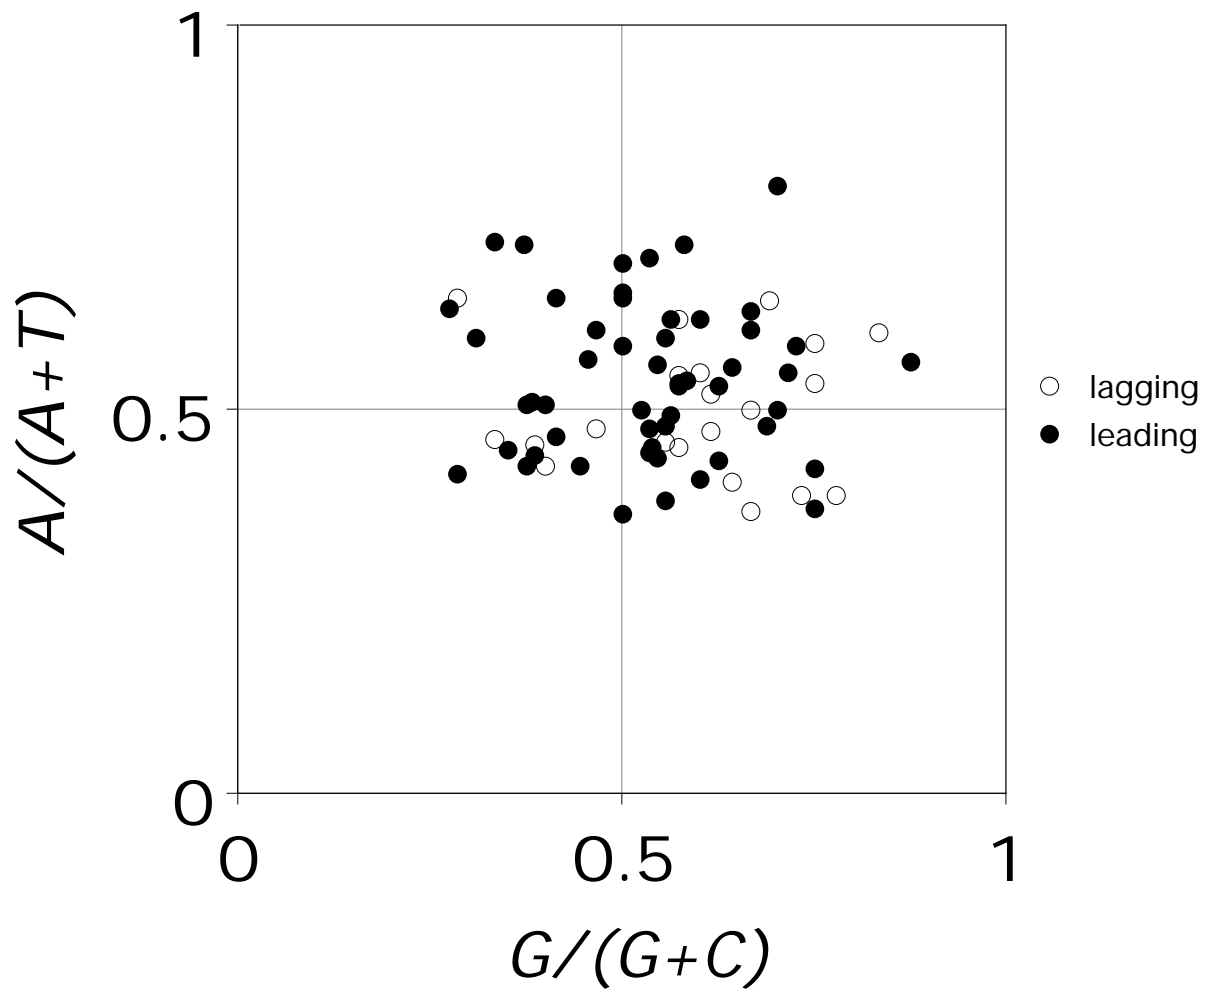

*Mycoplasma pulmonis*

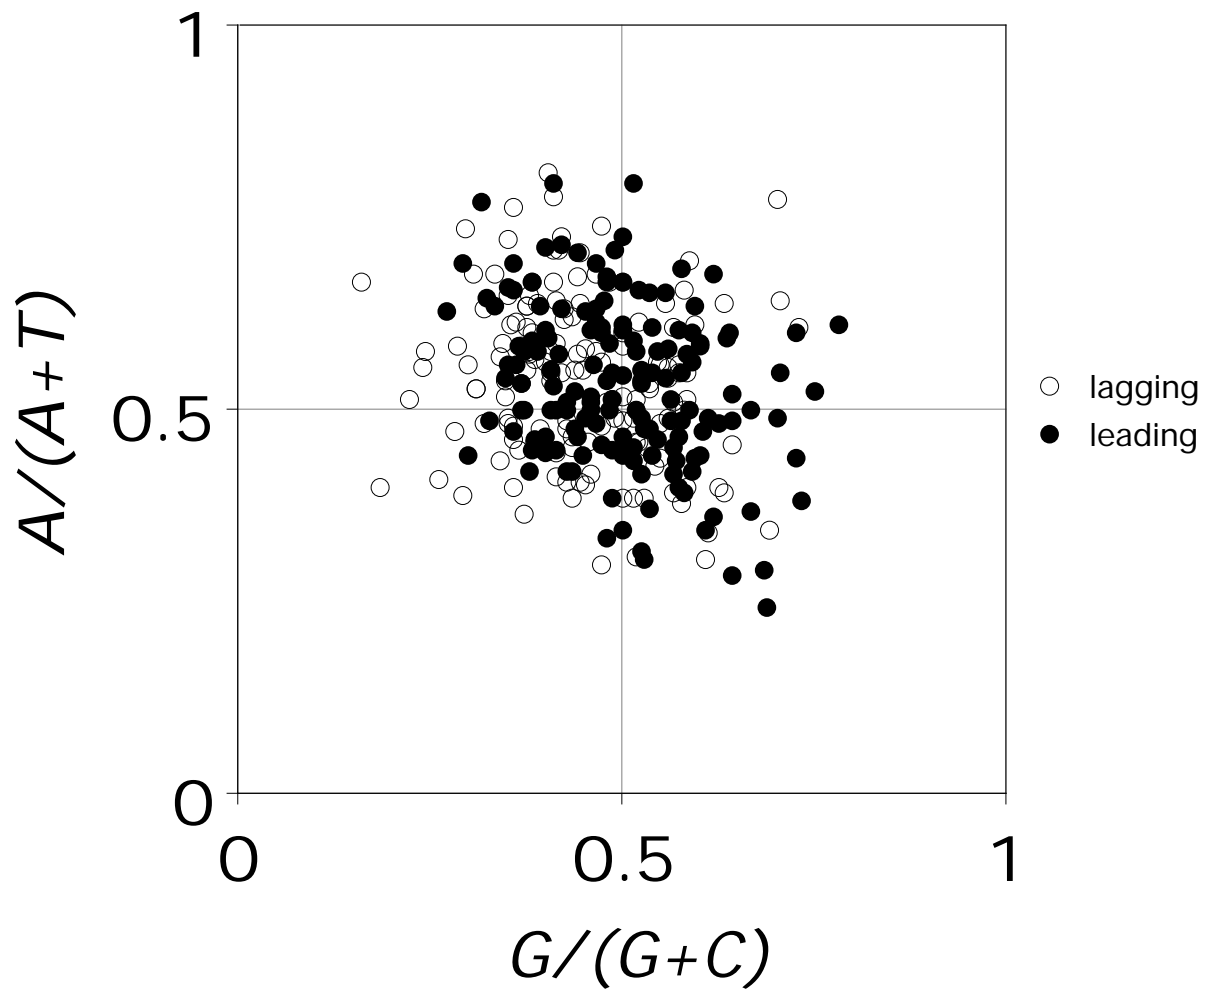

*Neisseria meningitidis* Z2491 (A)

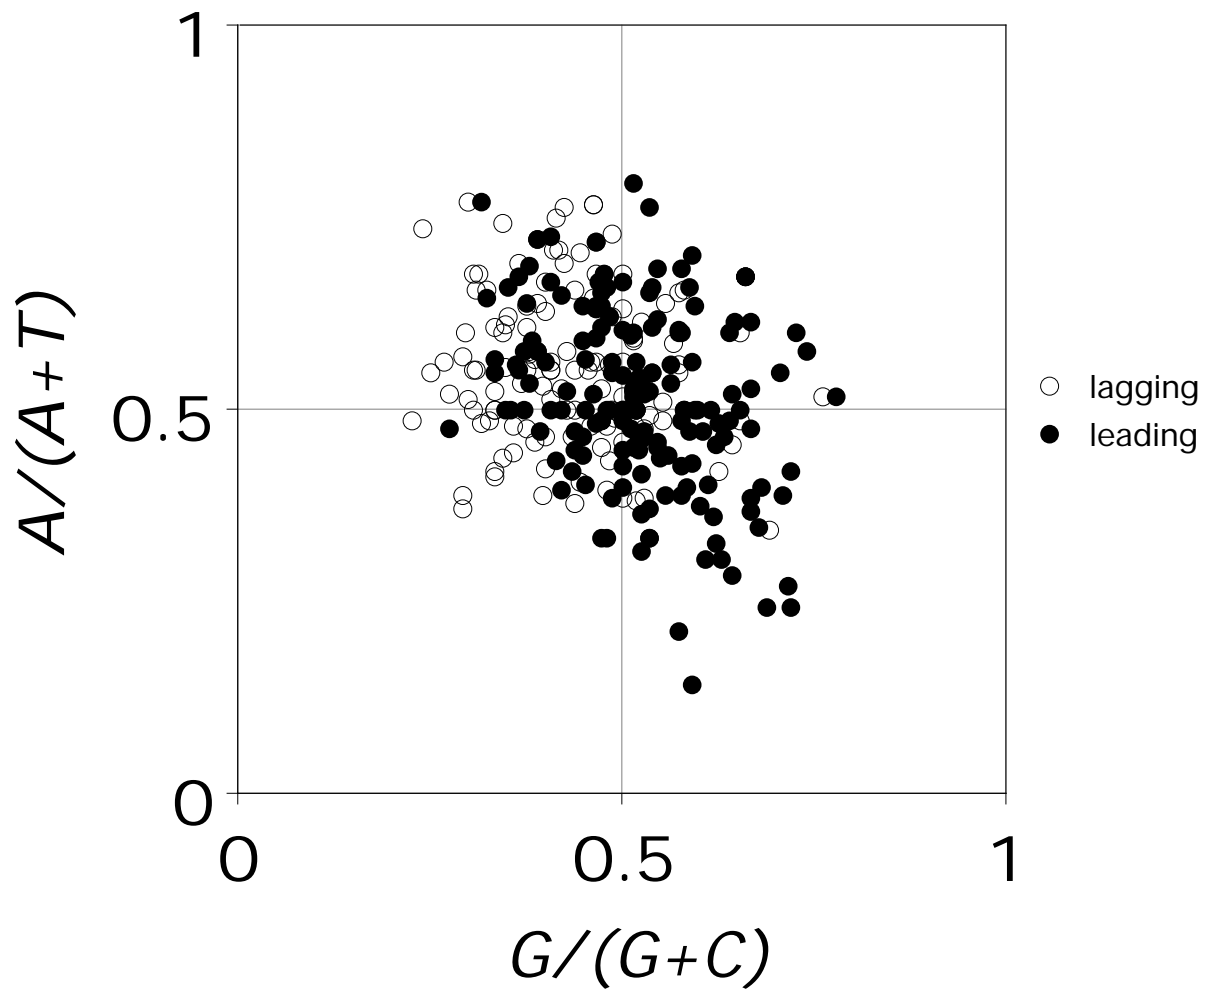

*Neisseria meningitidis* MC58 (B)

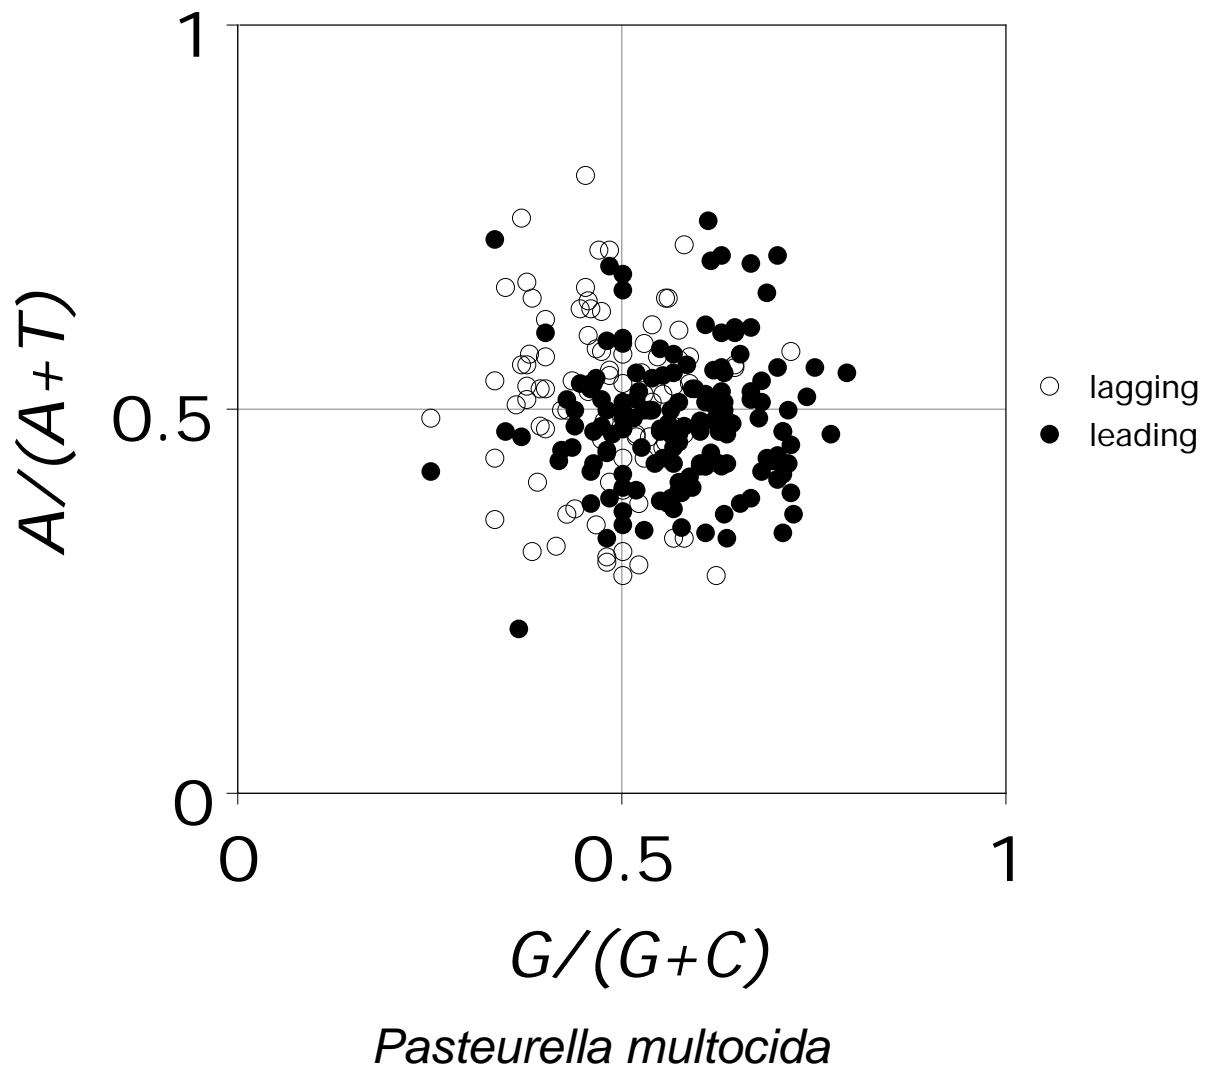

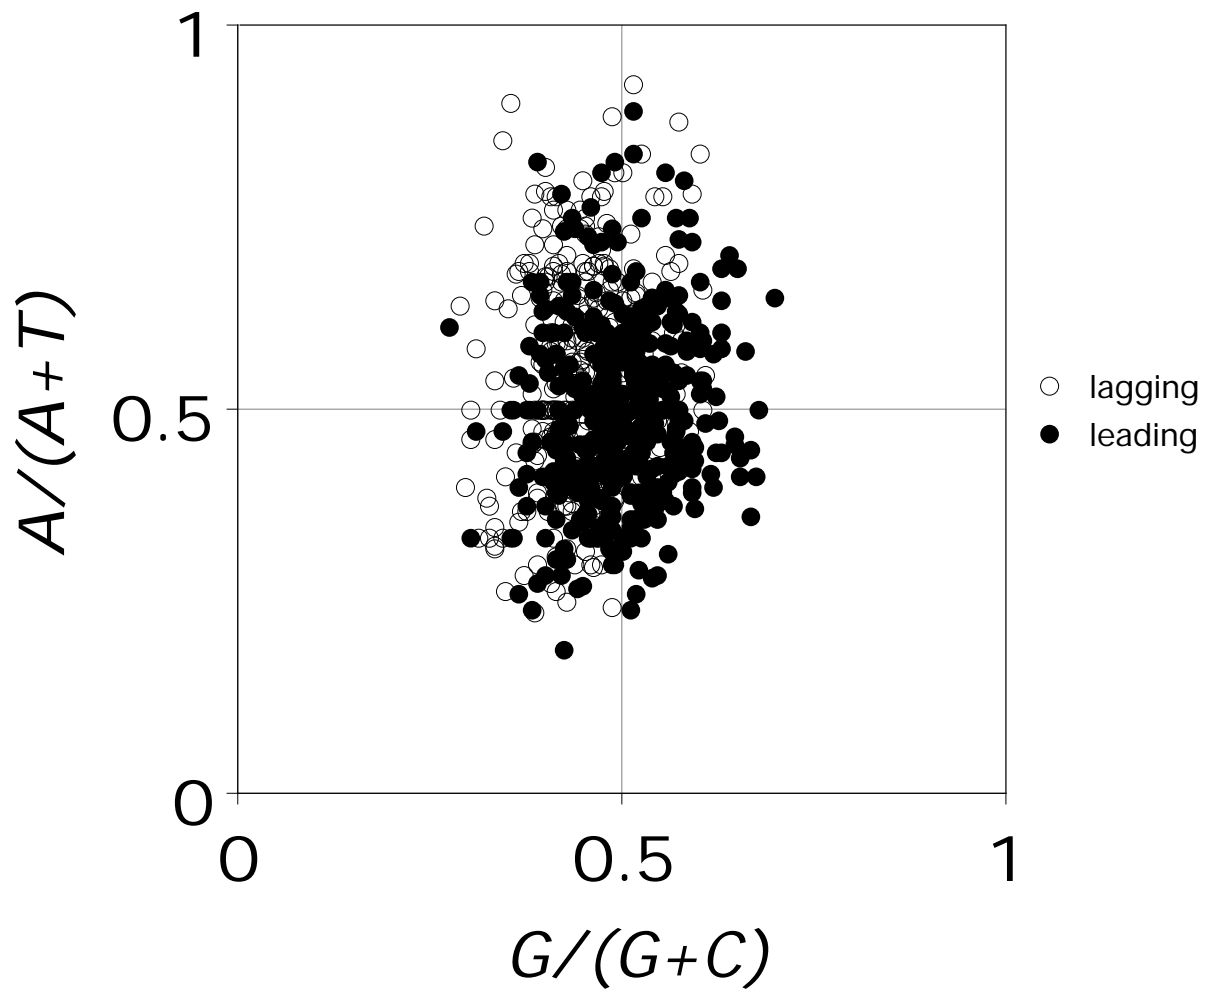

*Pseudomonas aeruginosa*



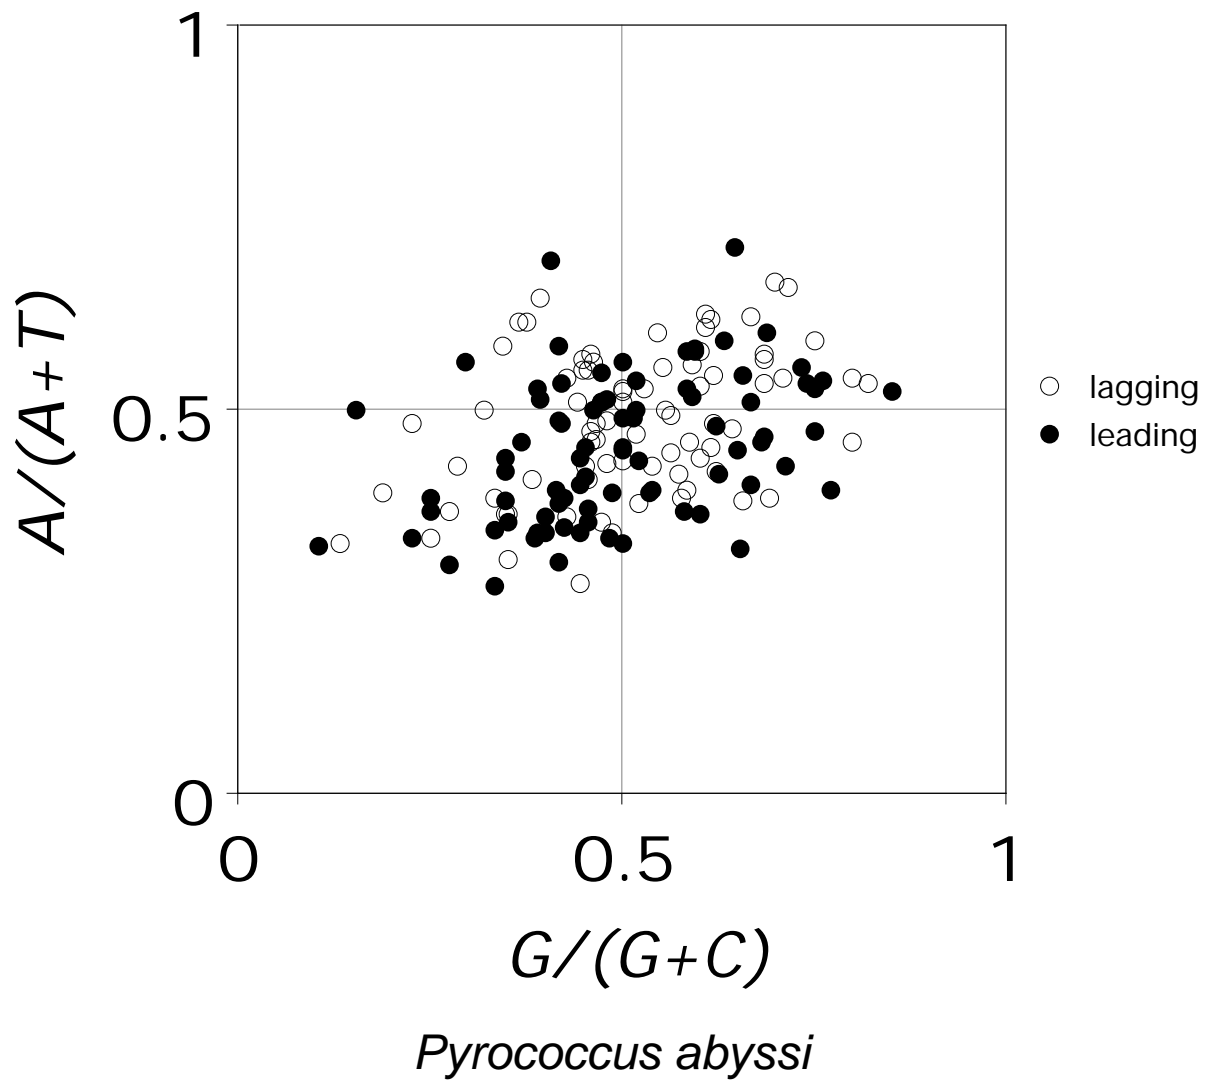

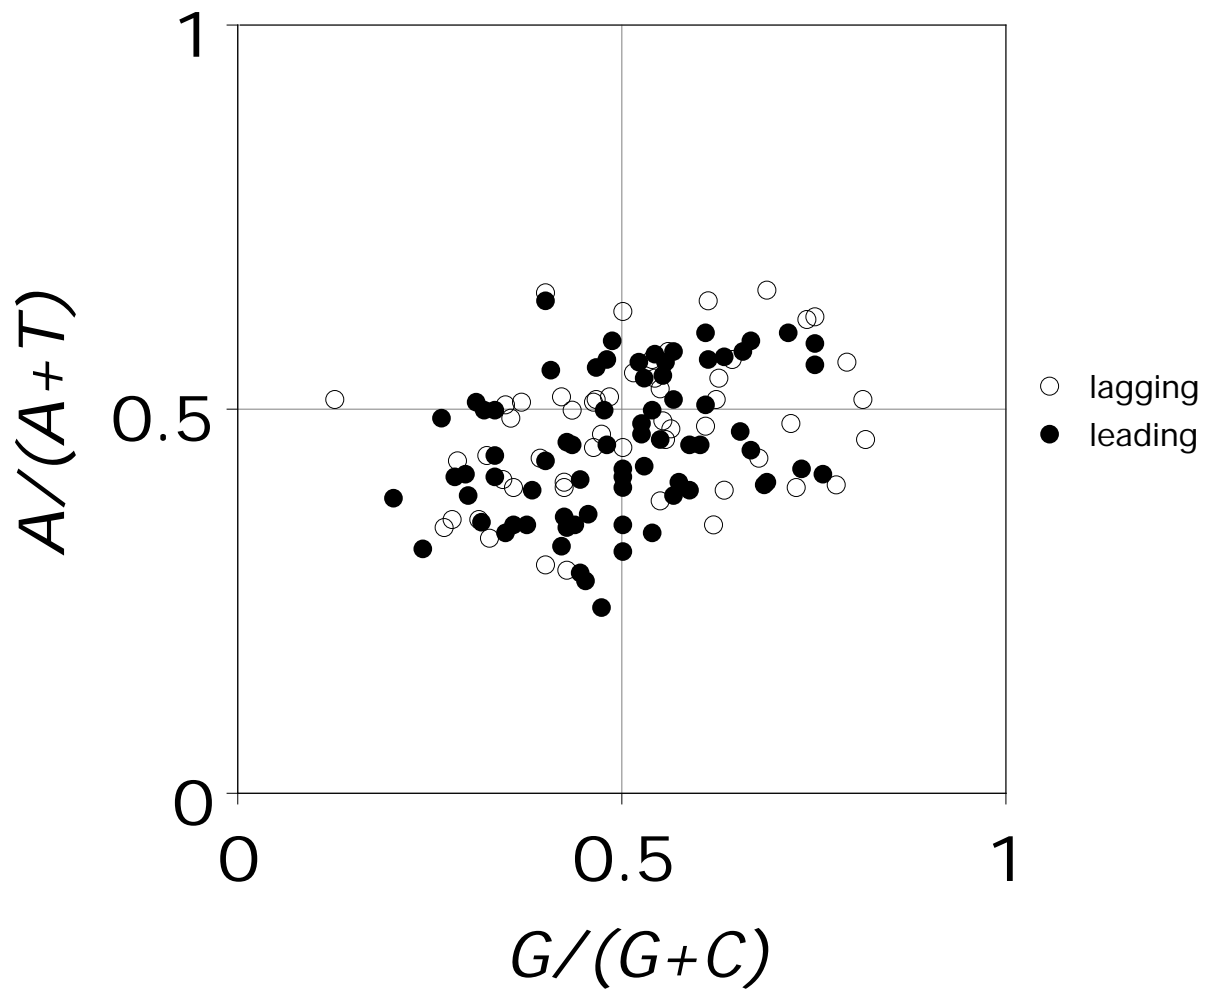

*Pyrococcus horikoshii*

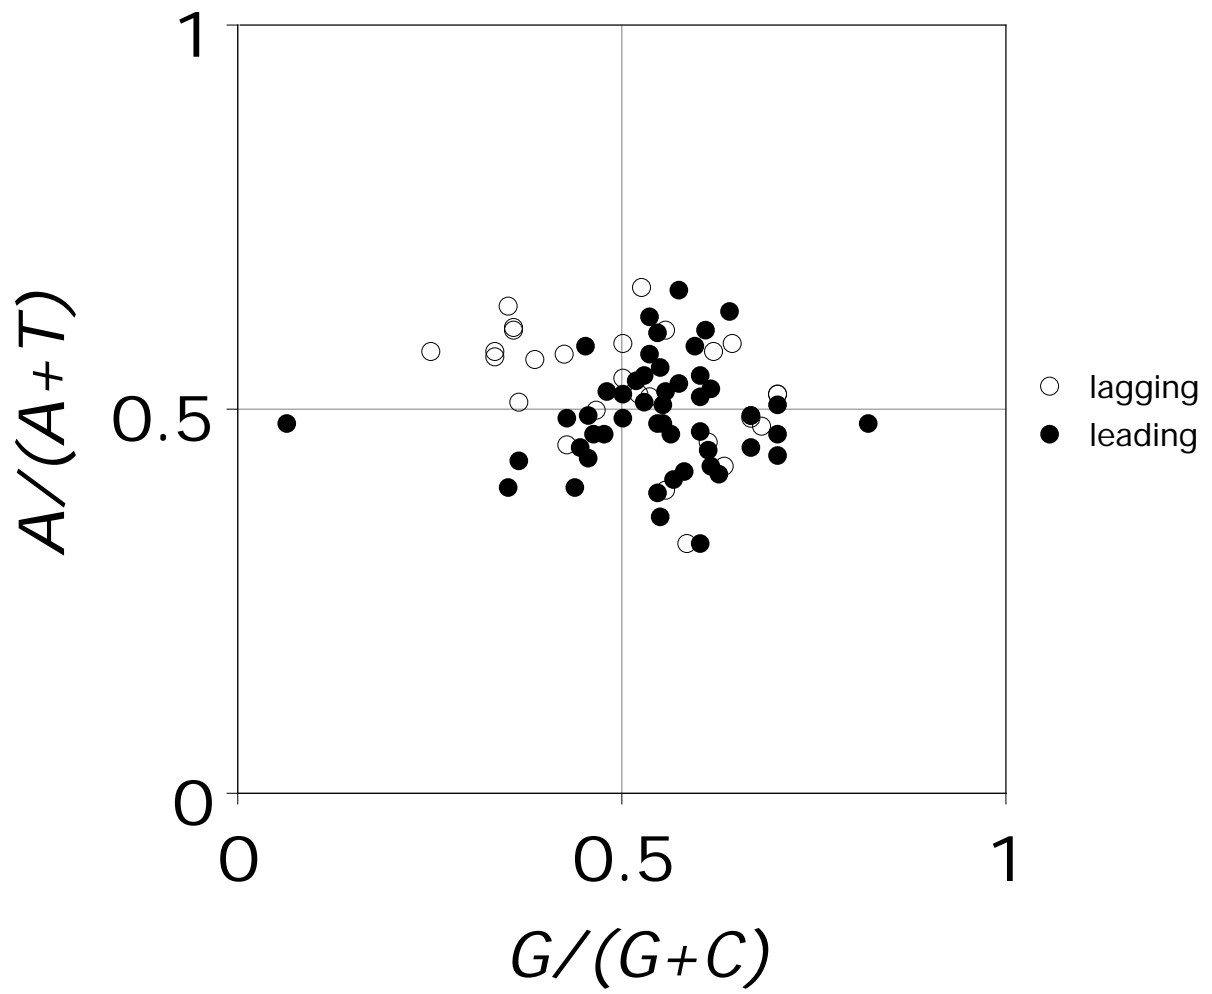

*Rickettsia prowazekii*

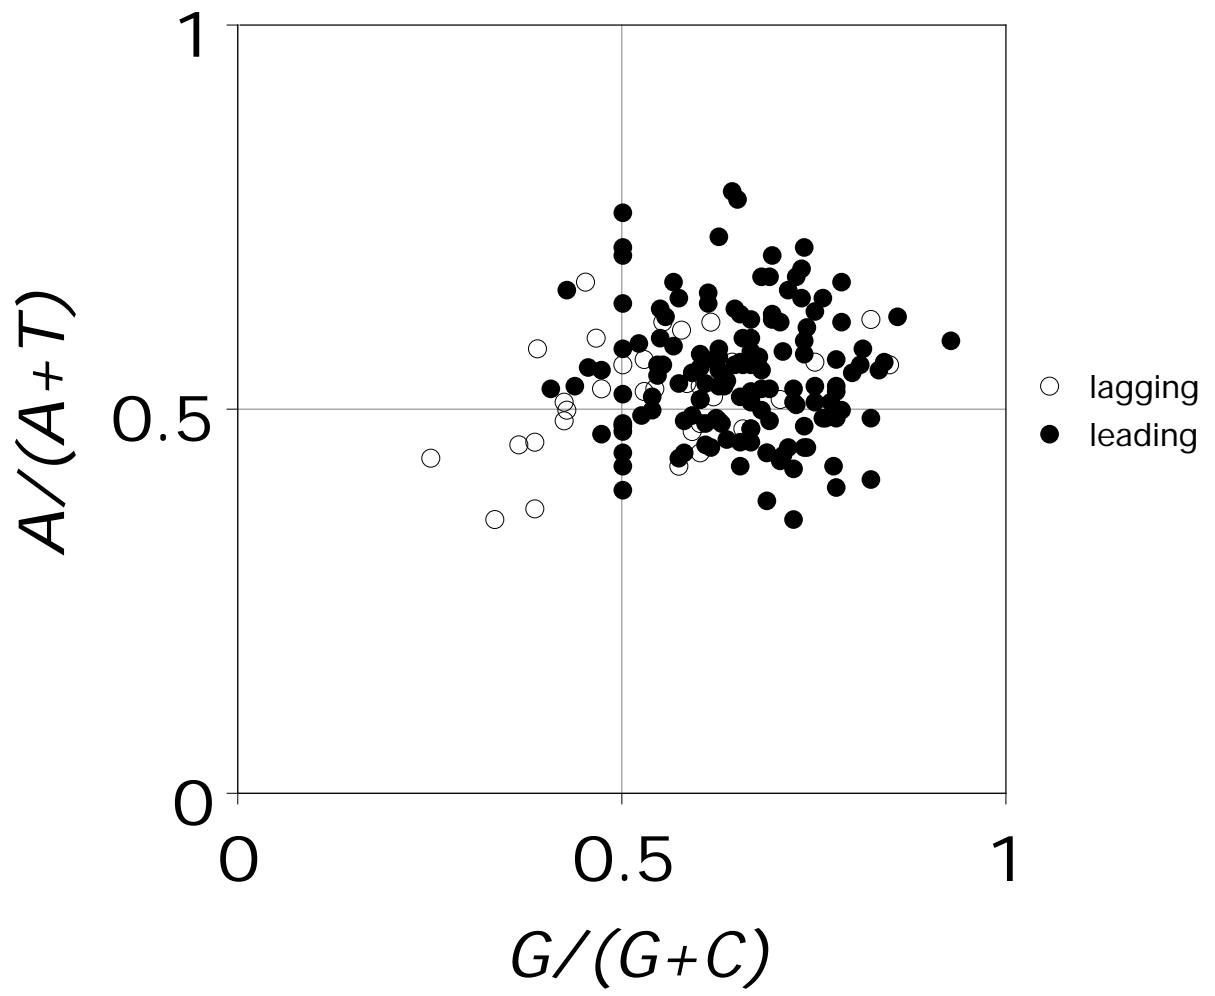

*Staphylococcus aureus* Mu50

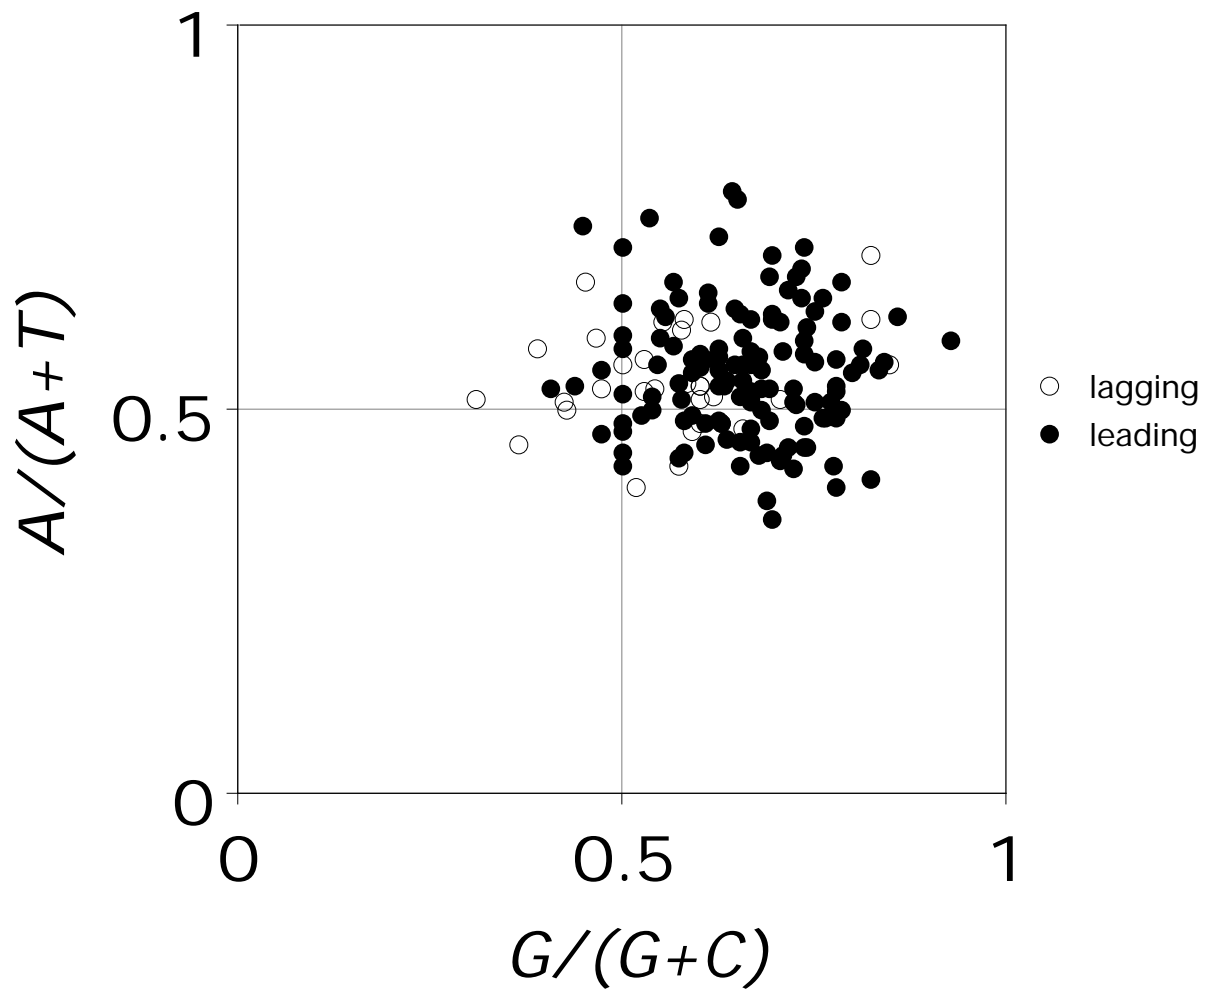

*Staphylococcus aureus* N315

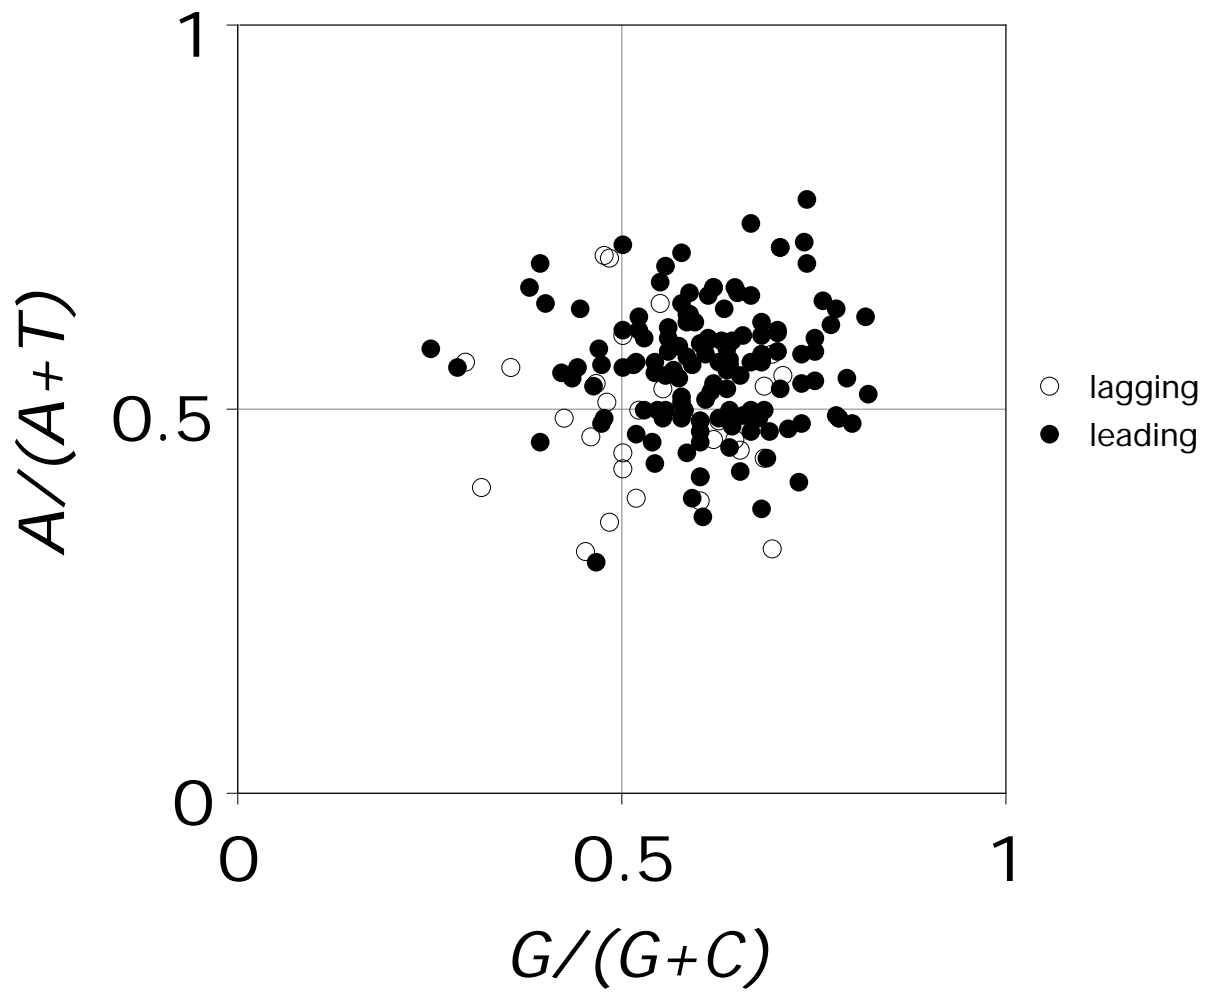

*Streptococcus pyogenes*

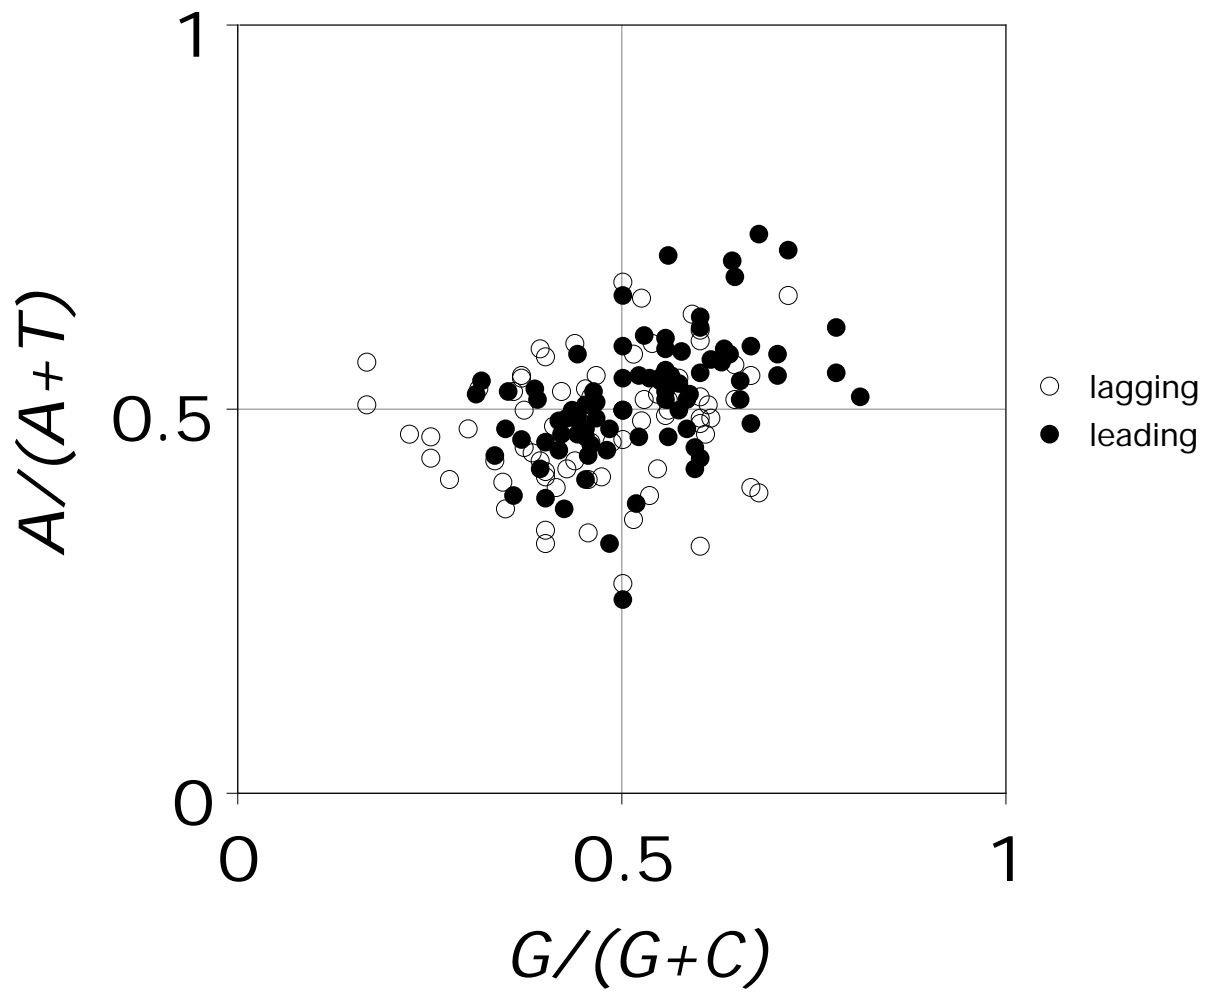

*Thermoplasma acidophilum*

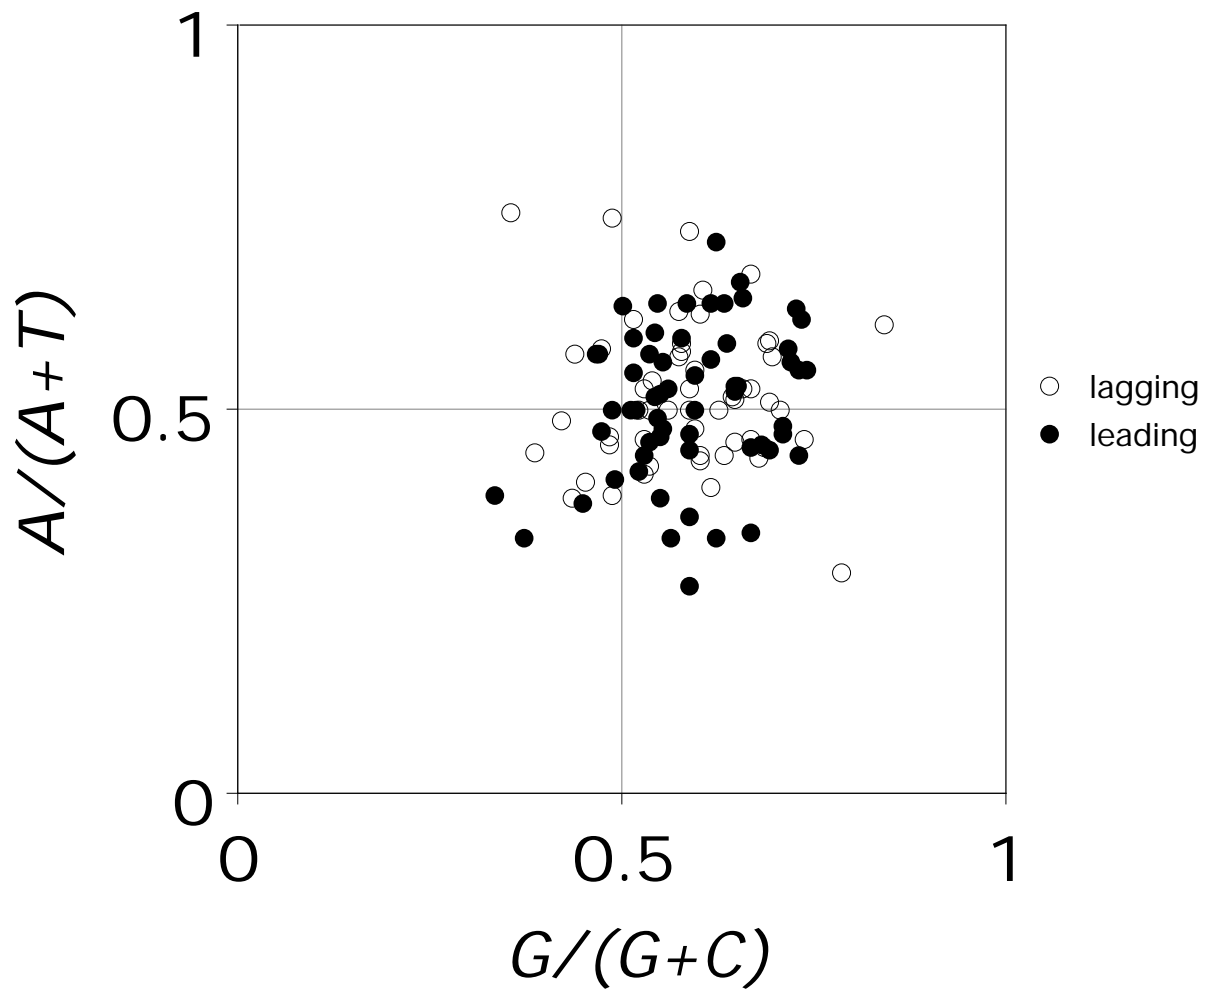

*Thermotoga maritima*



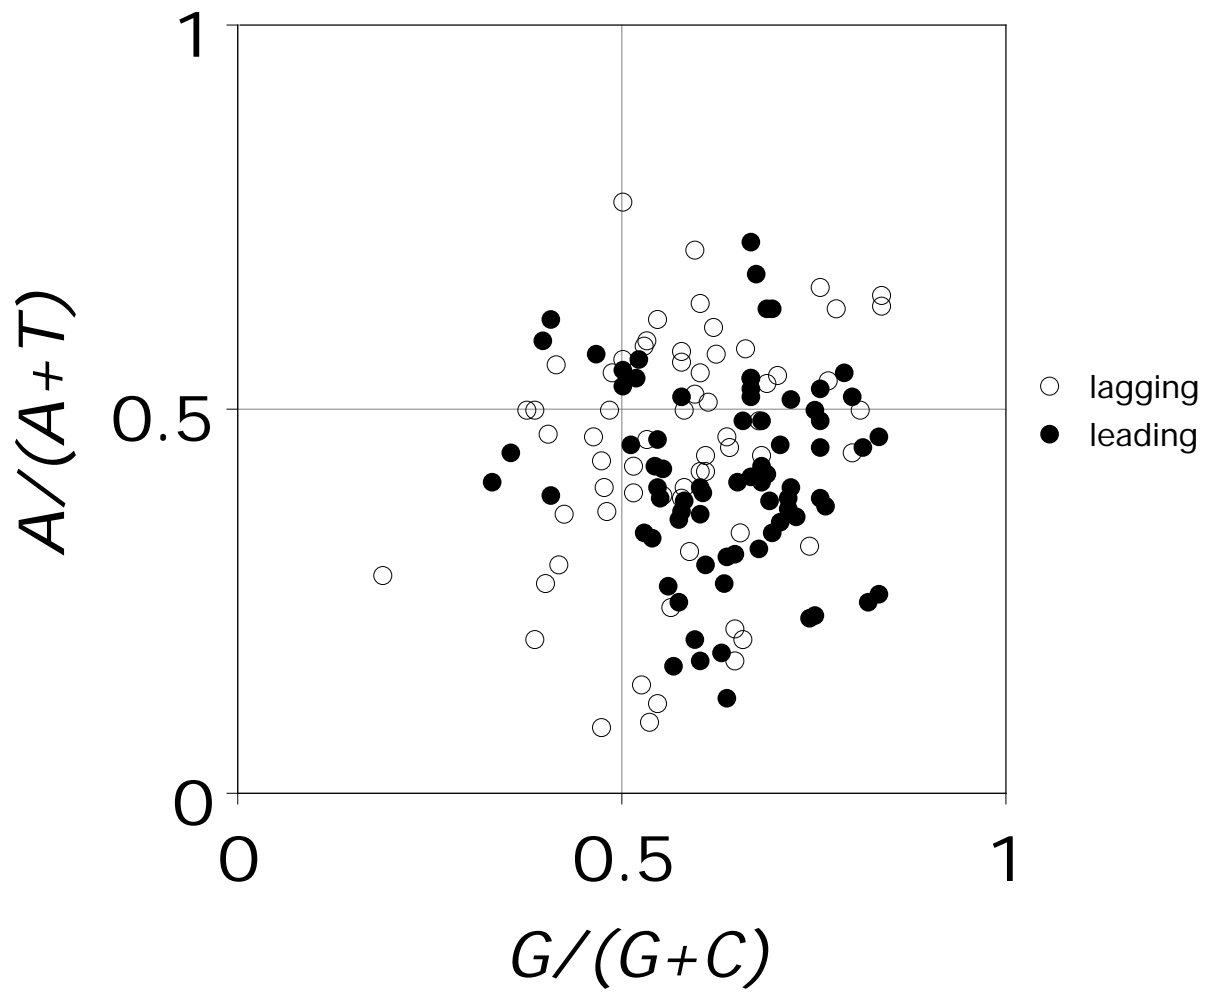

*Treponema pallidum*

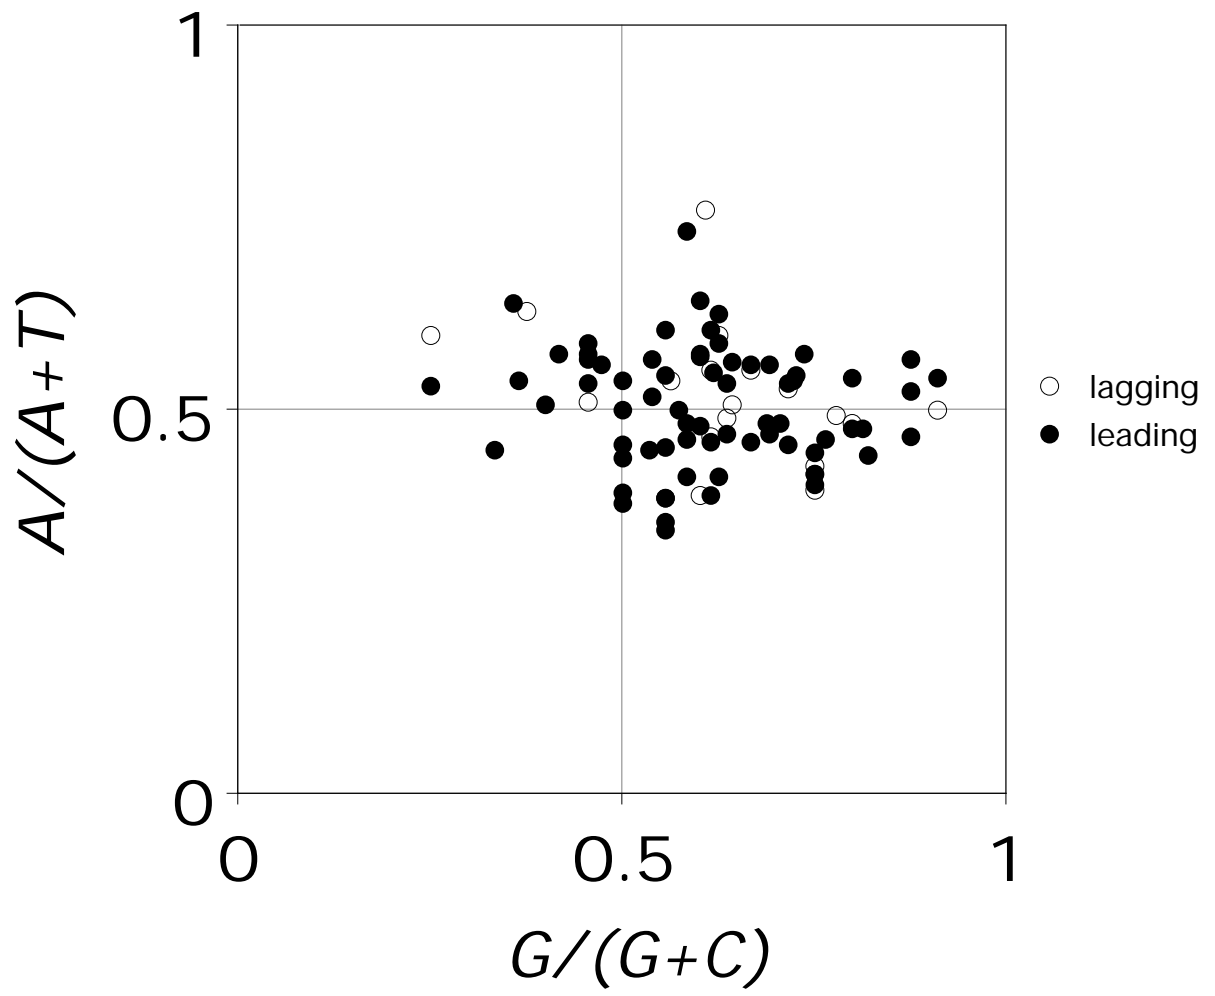

*Ureaplasma urealyticum*

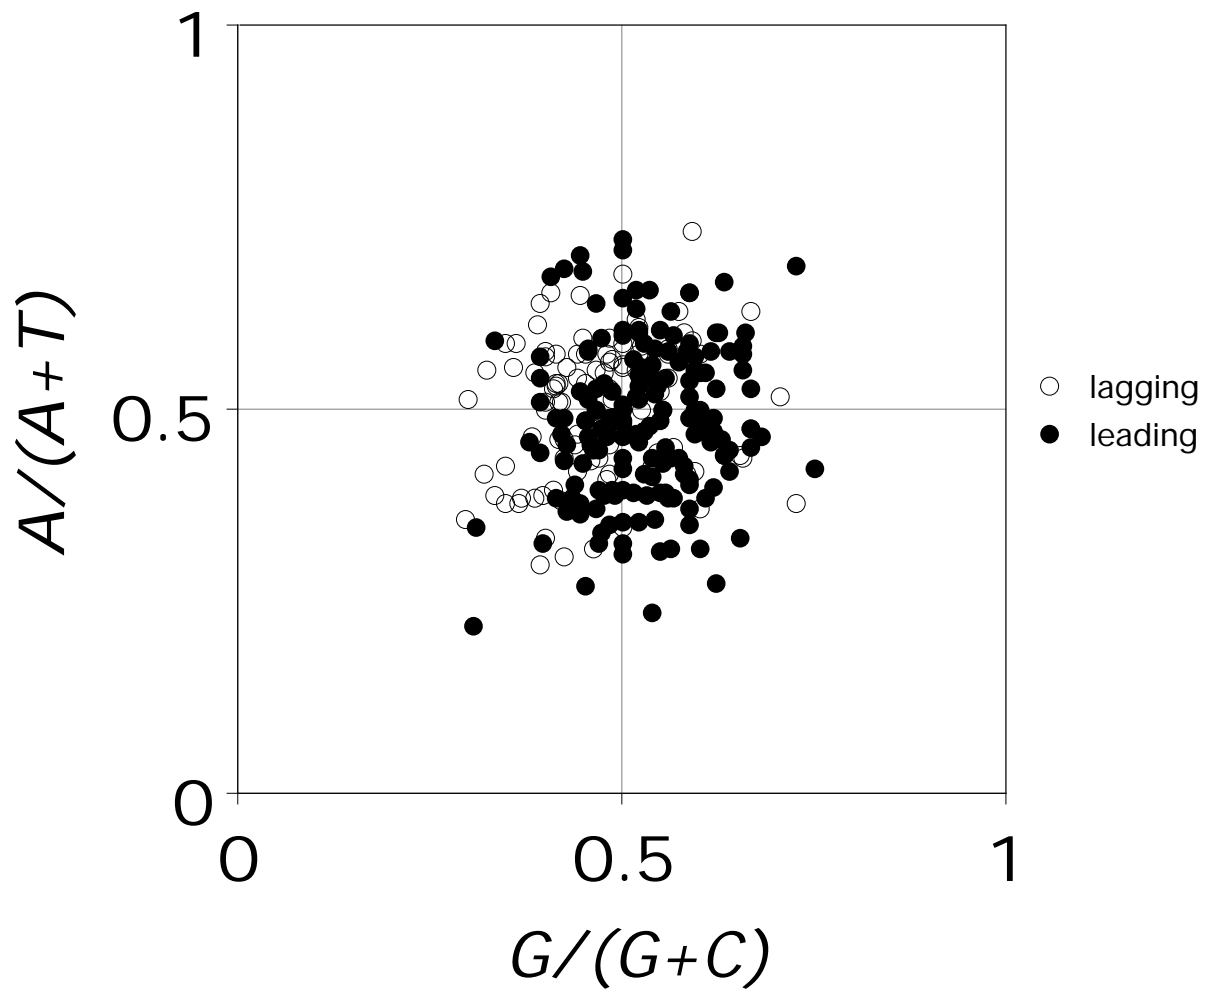

*Vibrio cholerae* chromosome 1

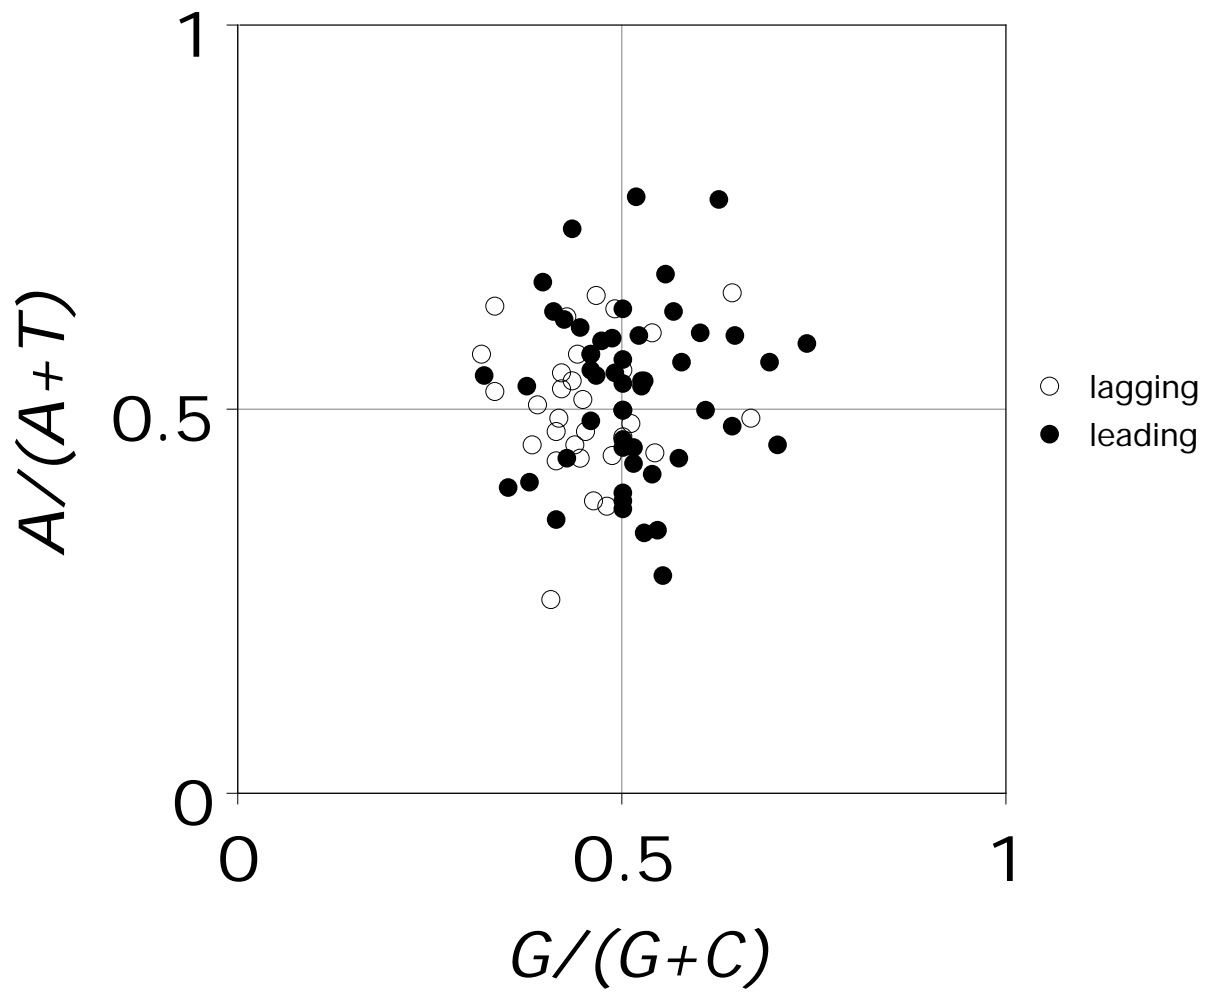

*Vibrio cholerae* chromosome 2

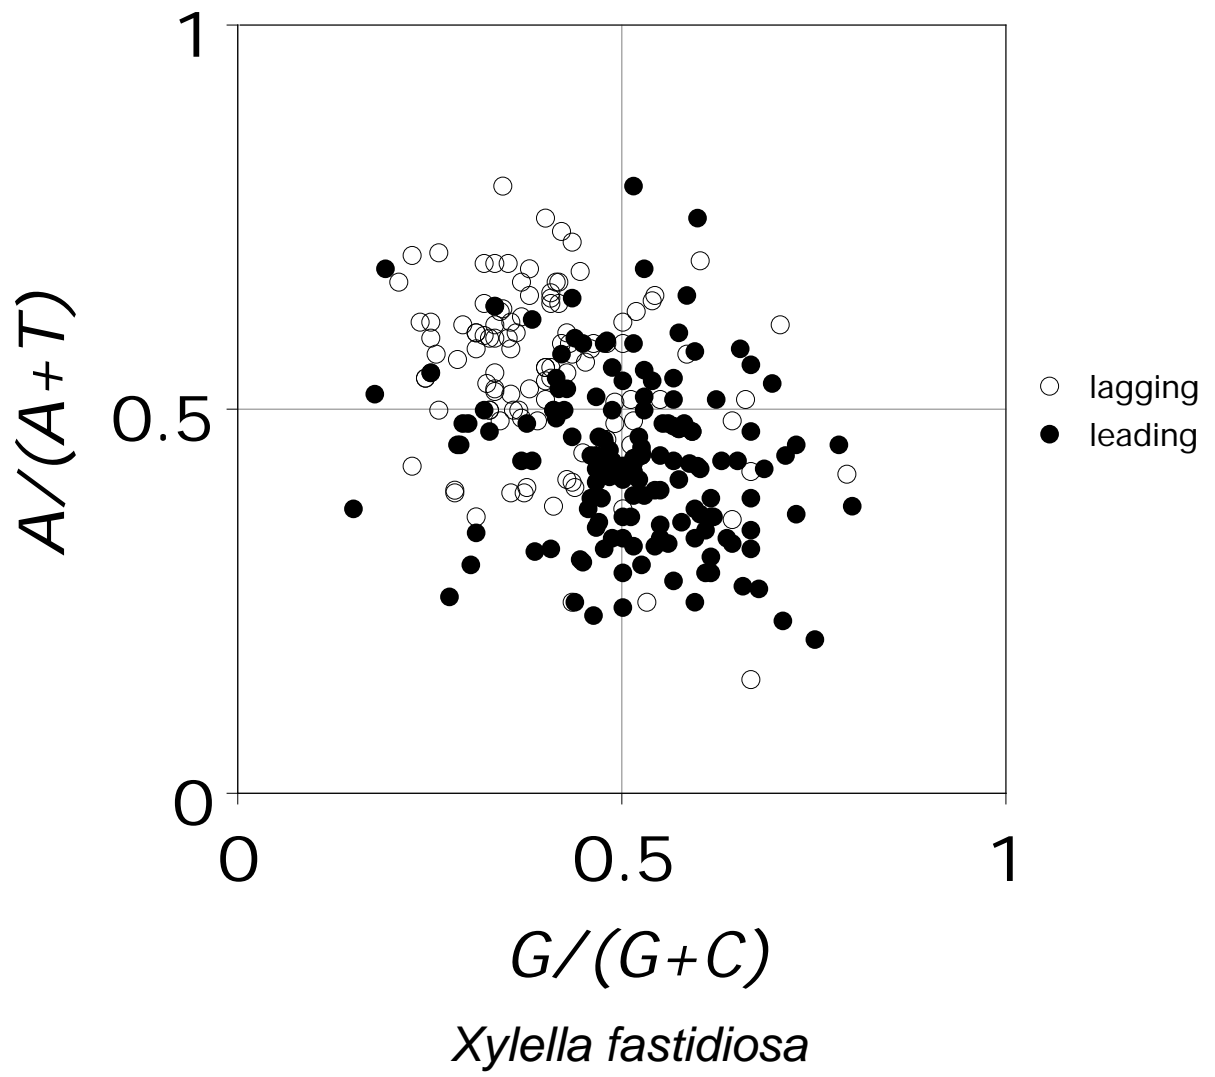

# CDS count

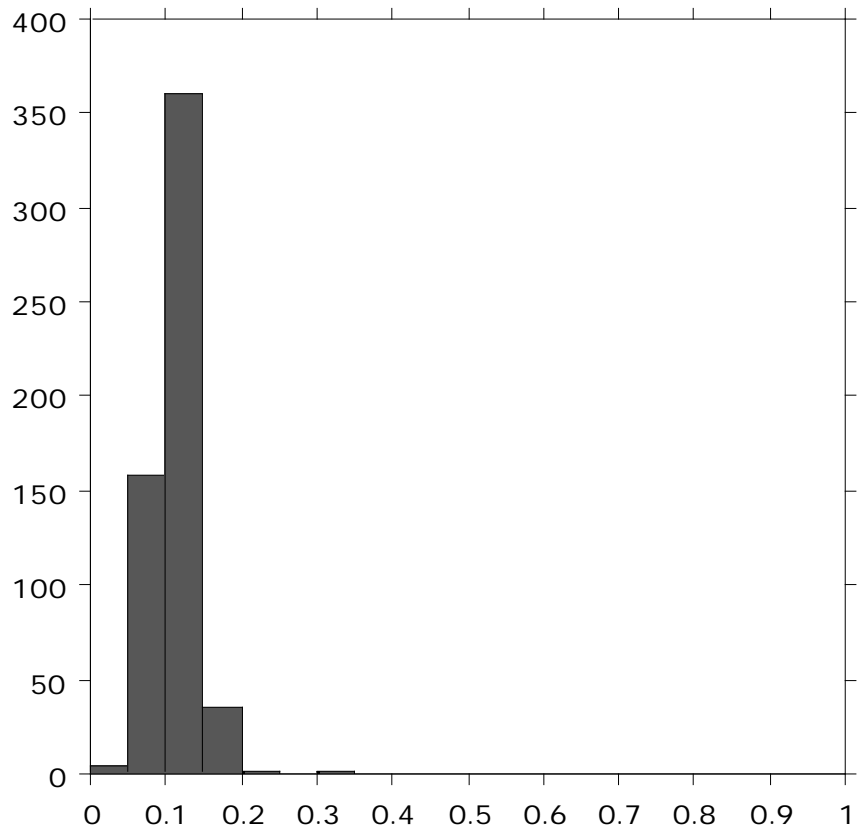

P3

*Ureaplasma urealyticum*

# CDS count

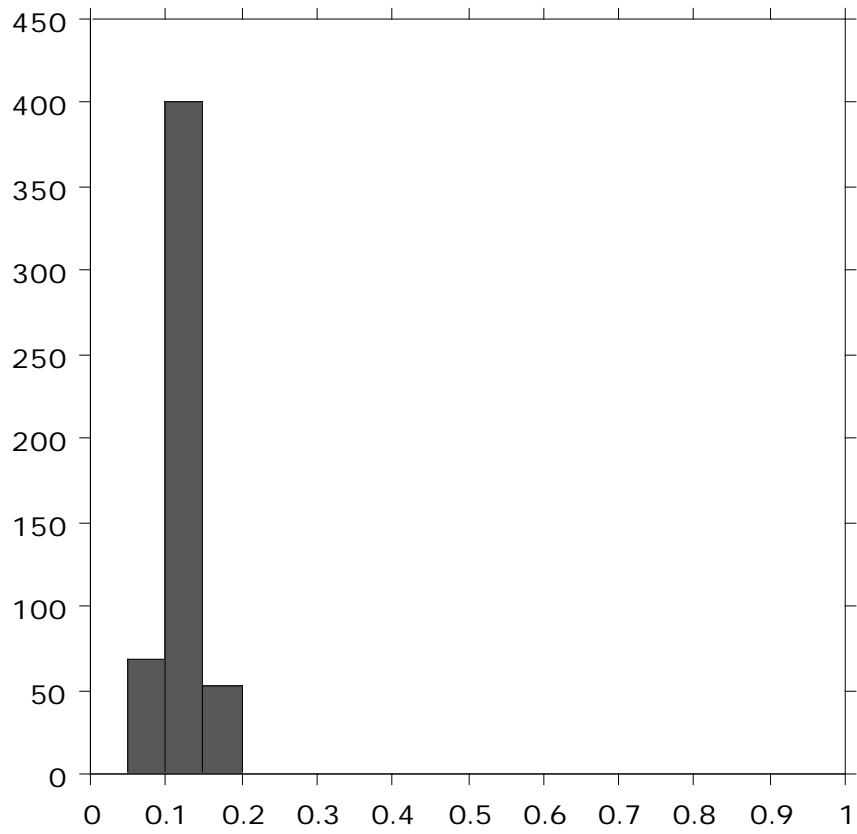

P3

*Buchnera sp.*

# CDS count

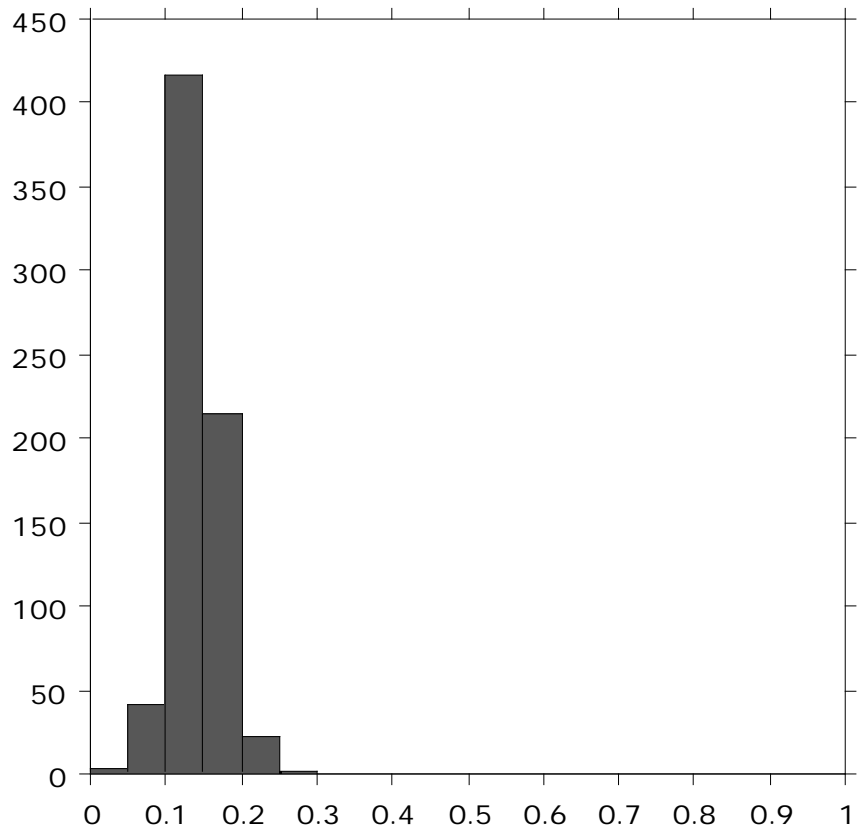

P3

*Mycoplasma pulmonis*



# CDS count

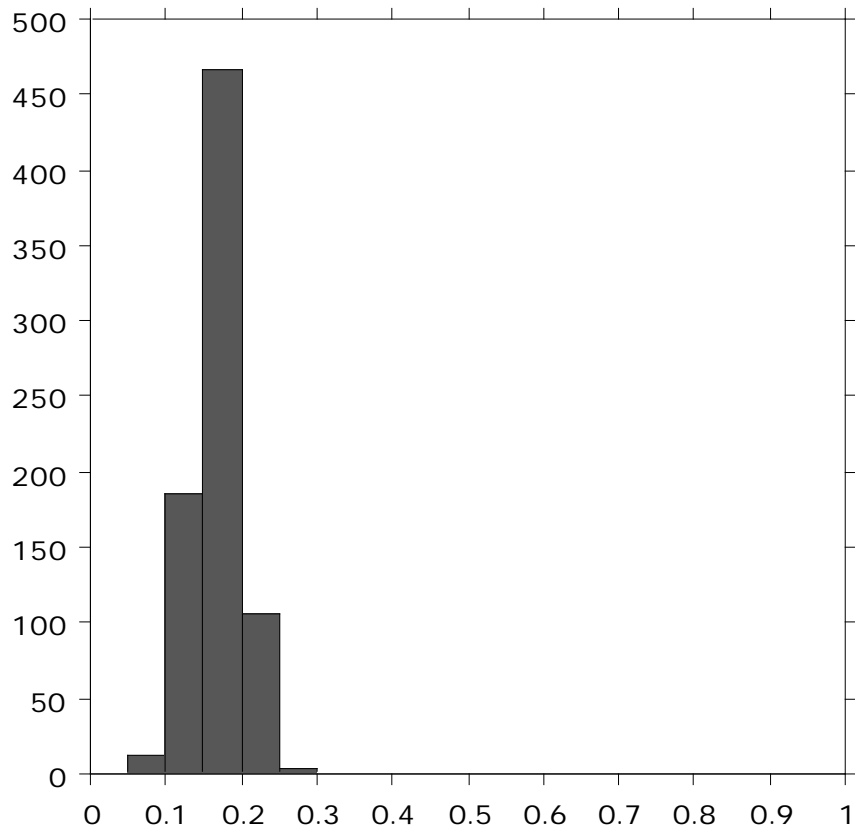

P3

*Rickettsia prowazekii*

# CDS count

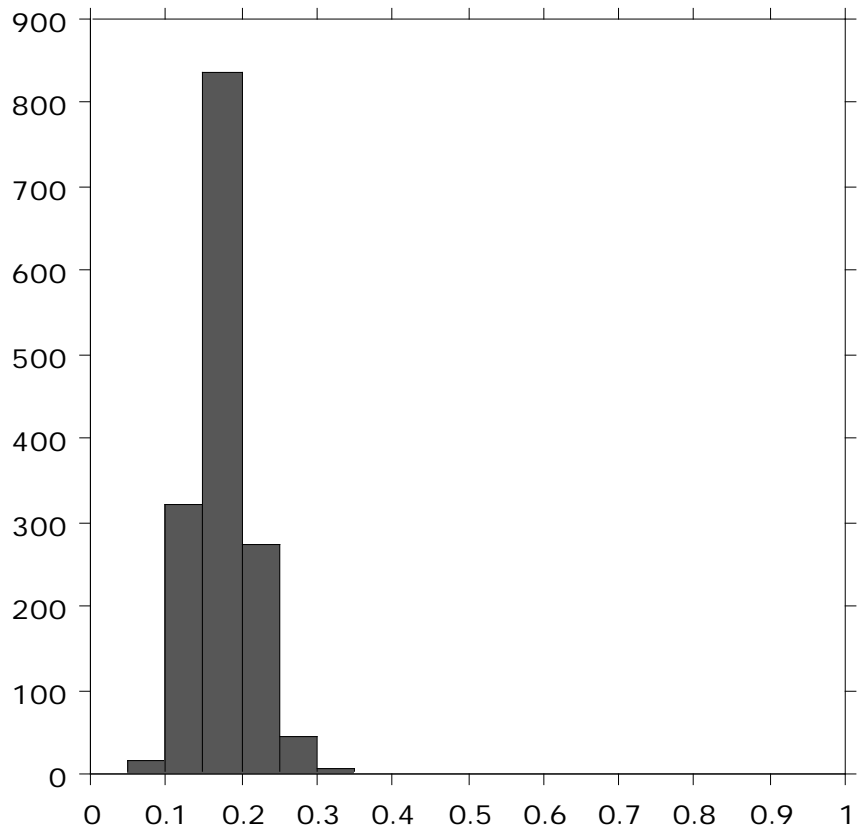

P3

*Campylobacter jejuni*

# CDS count

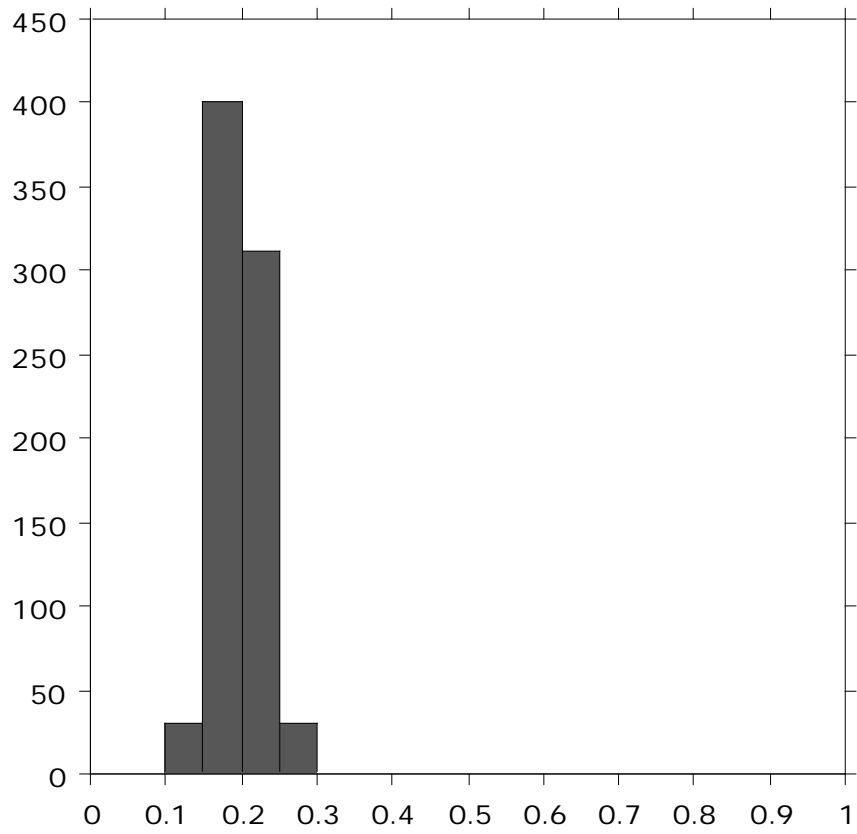

P3

*Borrelia burgdorferi*

# CDS count

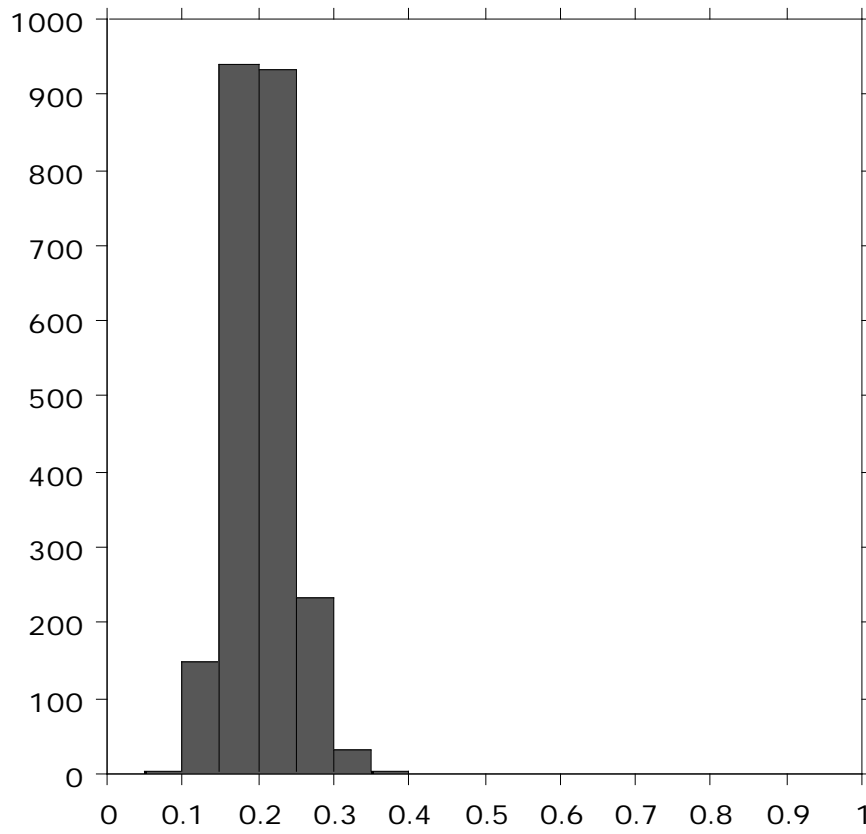

P3

*Staphylococcus aureus* N315

# CDS count

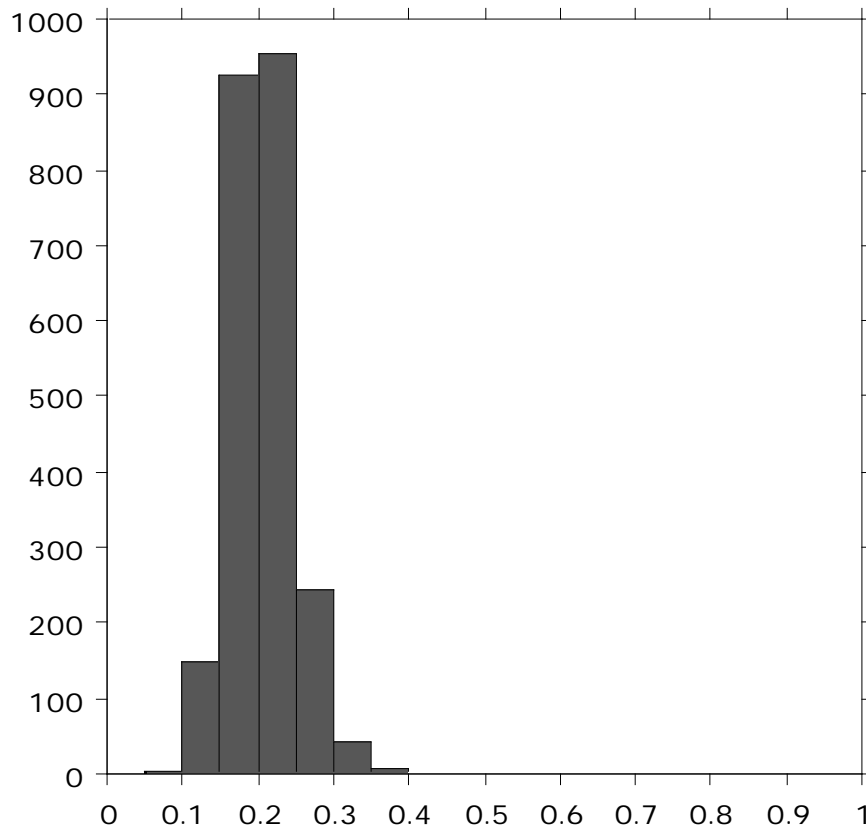

P3

*Staphylococcus aureus* Mu50

# CDS count

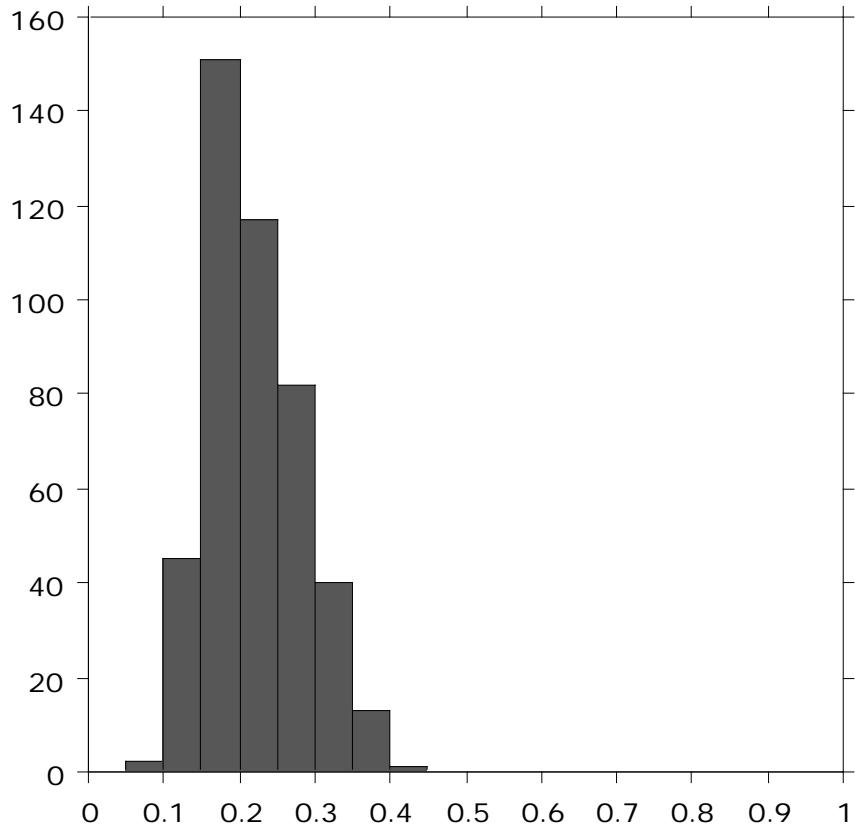

P3

*Mycoplasma genitalium*

# CDS count

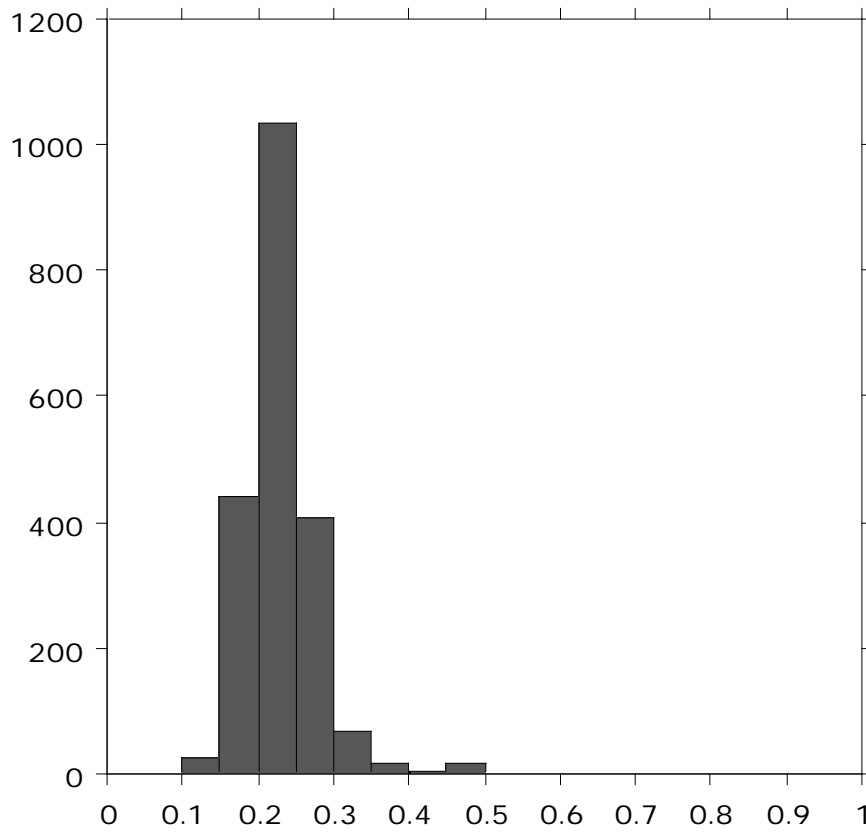

P3

*Lactococcus lactis*

# CDS count

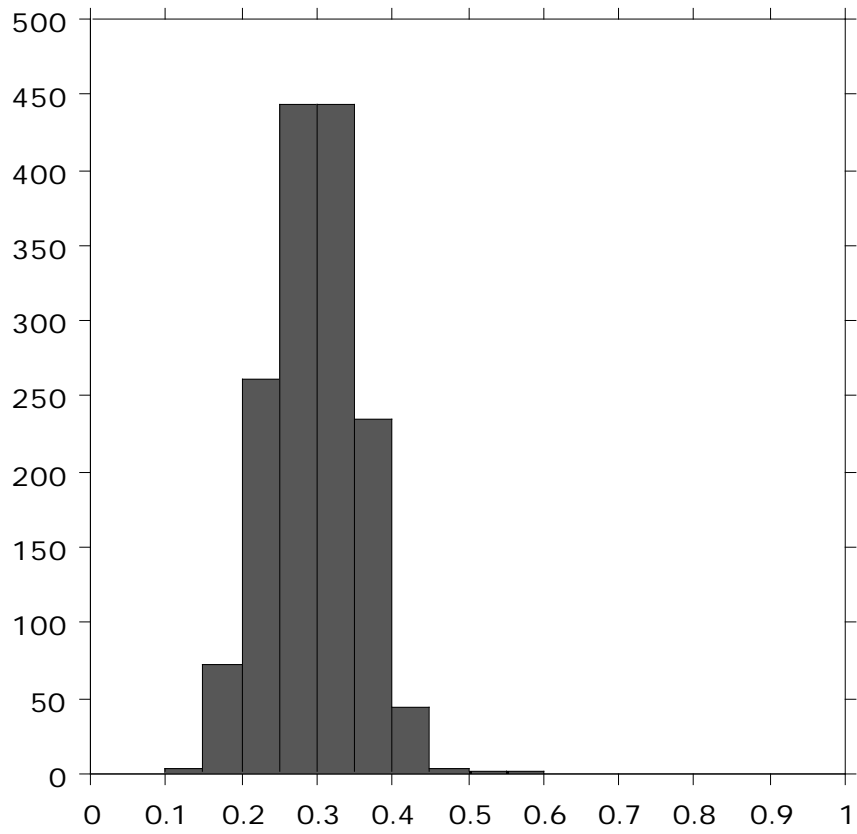

P3

*Streptococcus pyogenes*



# CDS count

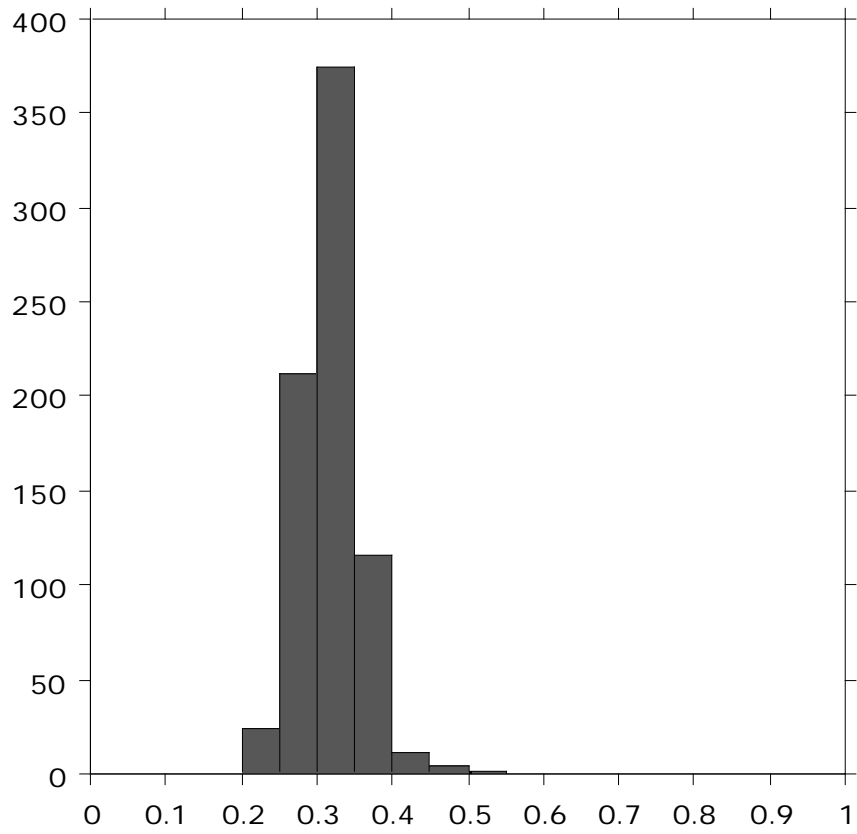

P3

*Chlamydia muridarum*

# CDS count

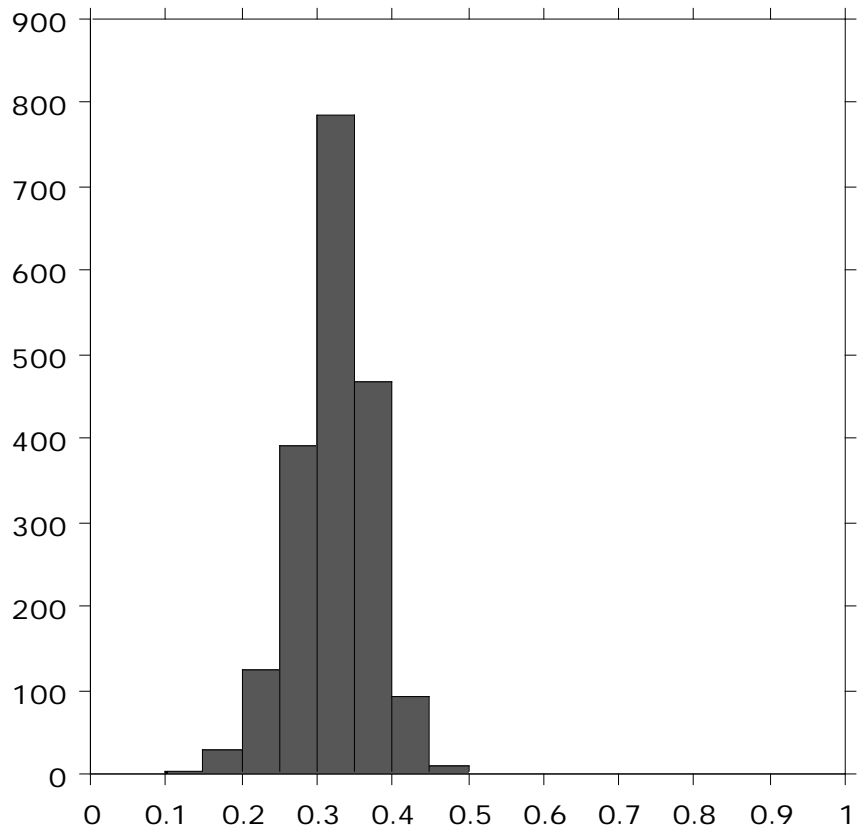

P3

*Pasteurella multocida*

# CDS count

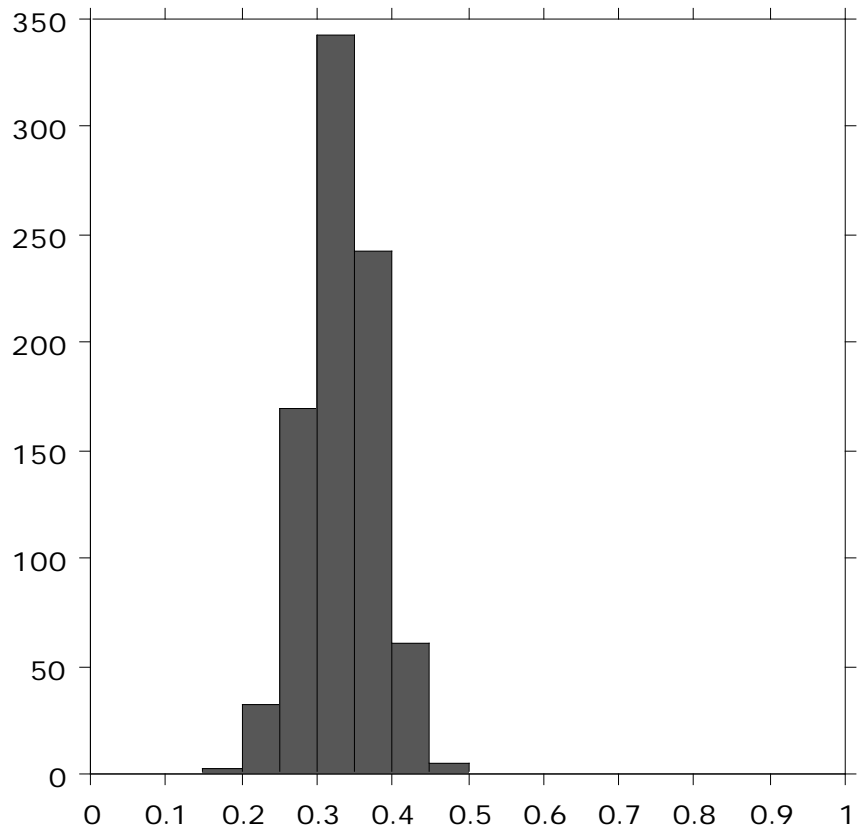

*Chlamydomophila pneumoniae* AR39

P3

# CDS count

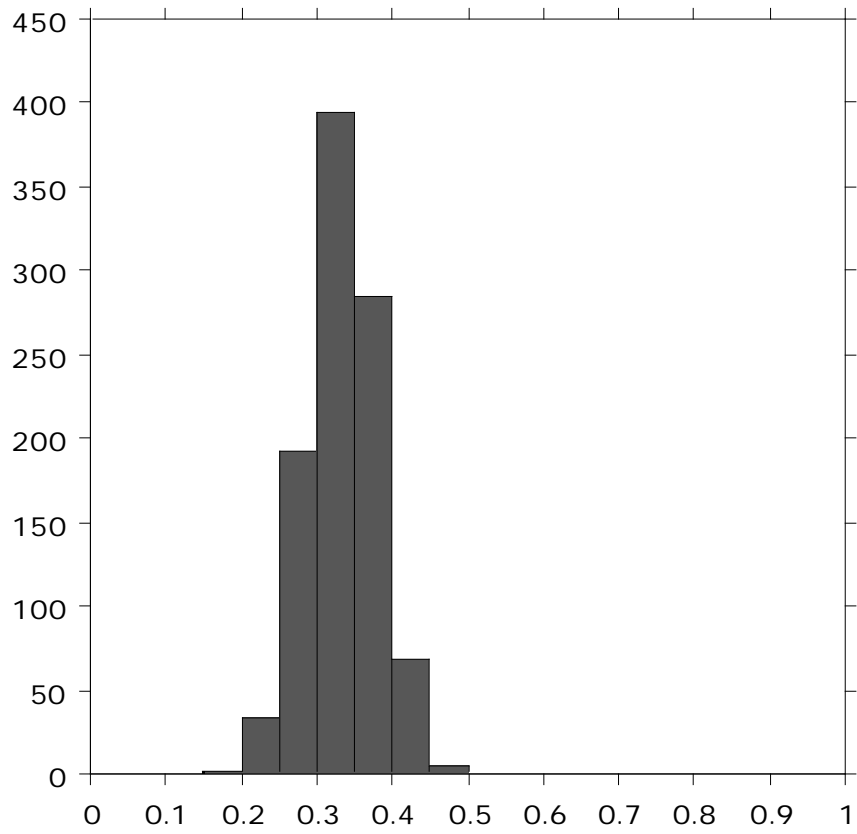

*Chlamydophila pneumoniae* J138

P3

# CDS count

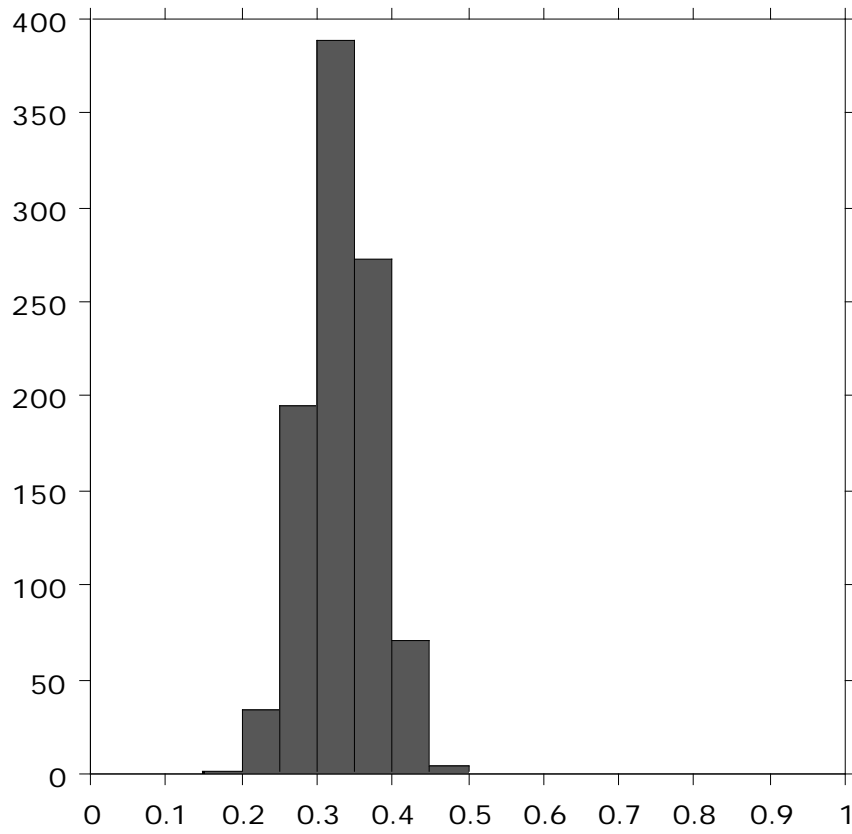

P3

*Chlamydophila pneumoniae* CWL029

# CDS count

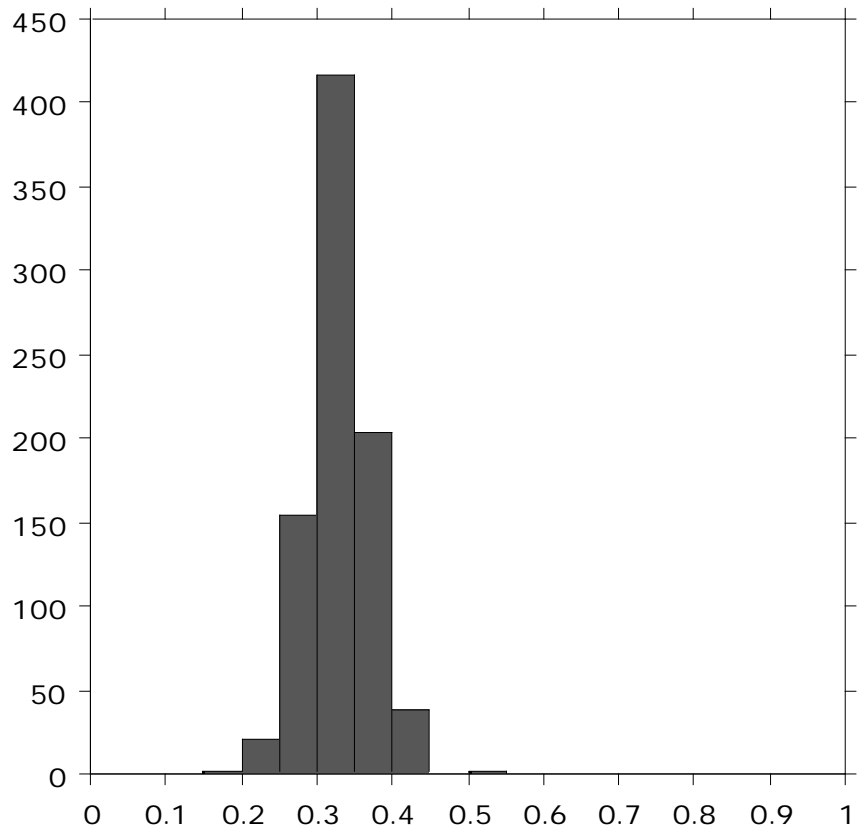

P3

*Chlamydia trachomatis*

# CDS count

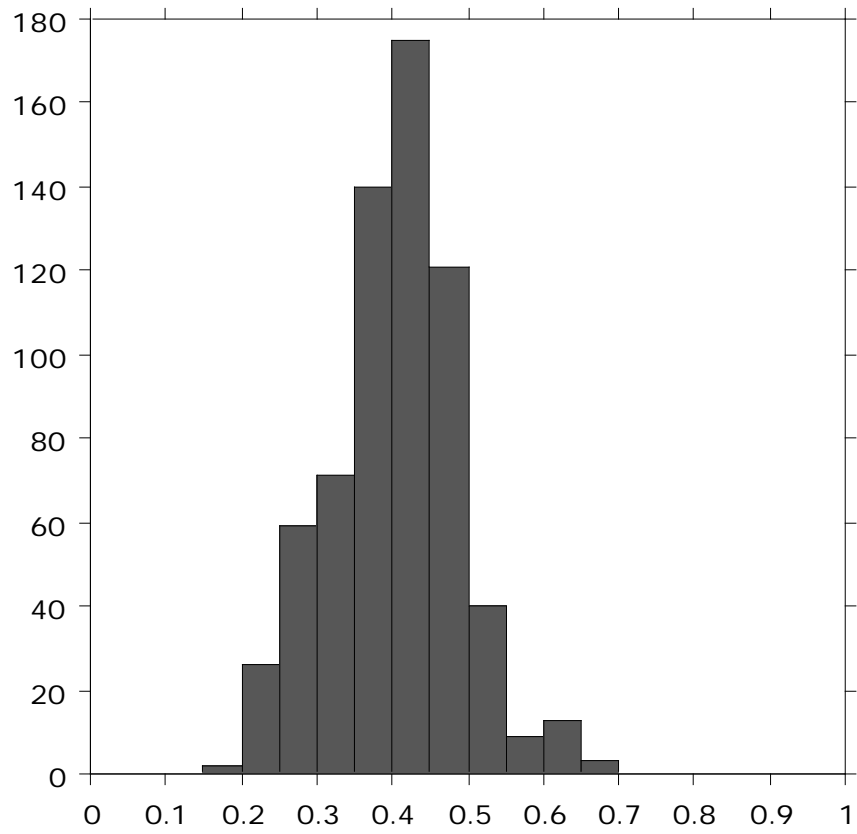

P3

*Mycoplasma pneumoniae*

# CDS count

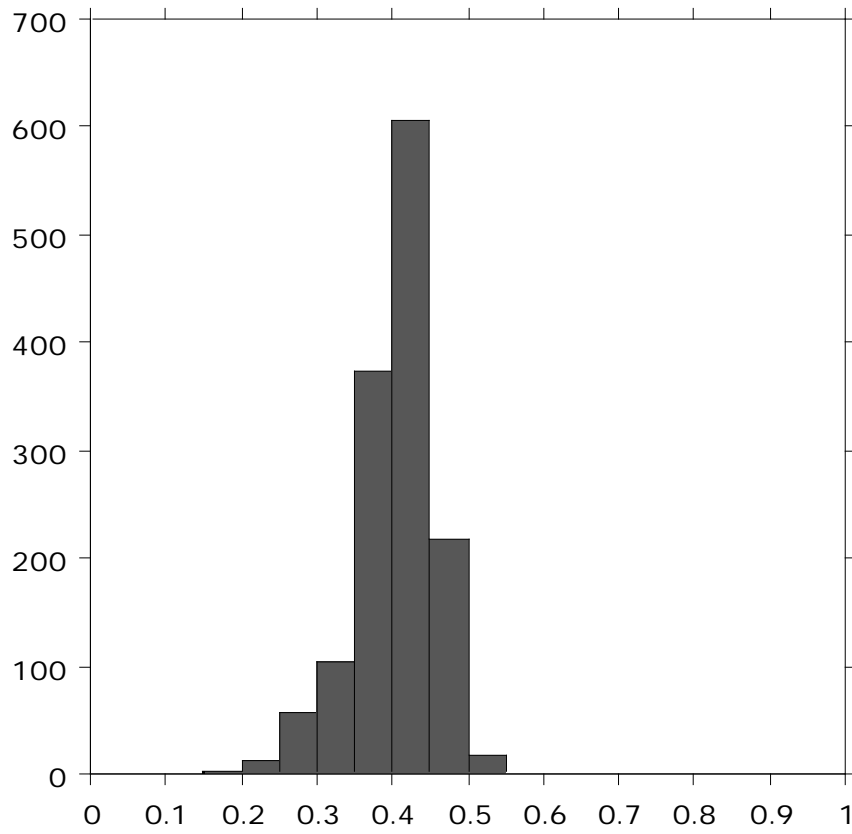

*Helicobacter pylori* 26695

P3



# CDS count

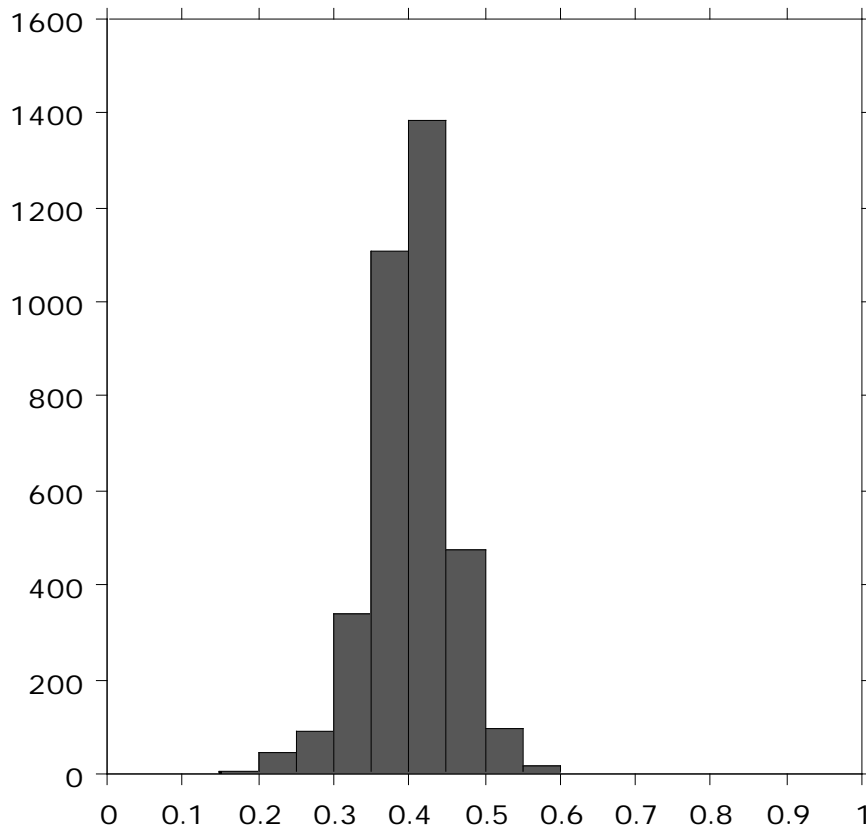

P3

*Bacillus halodurans*

# CDS count

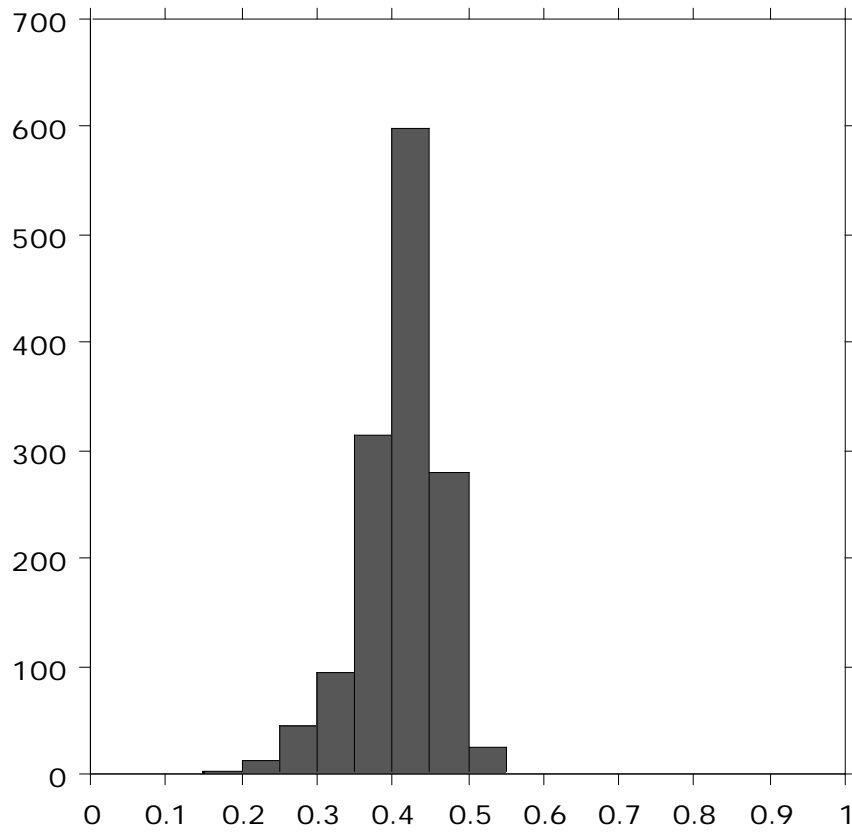

*Helicobacter pylori* J99

P3

# CDS count

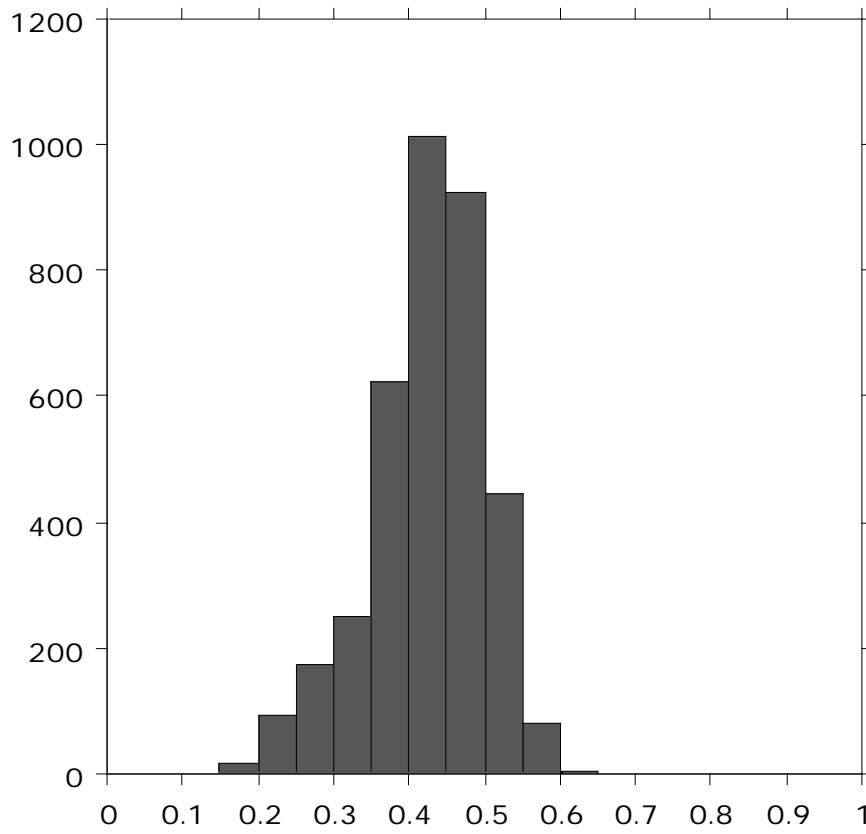

P3

*Bacillus subtilis*

# CDS count

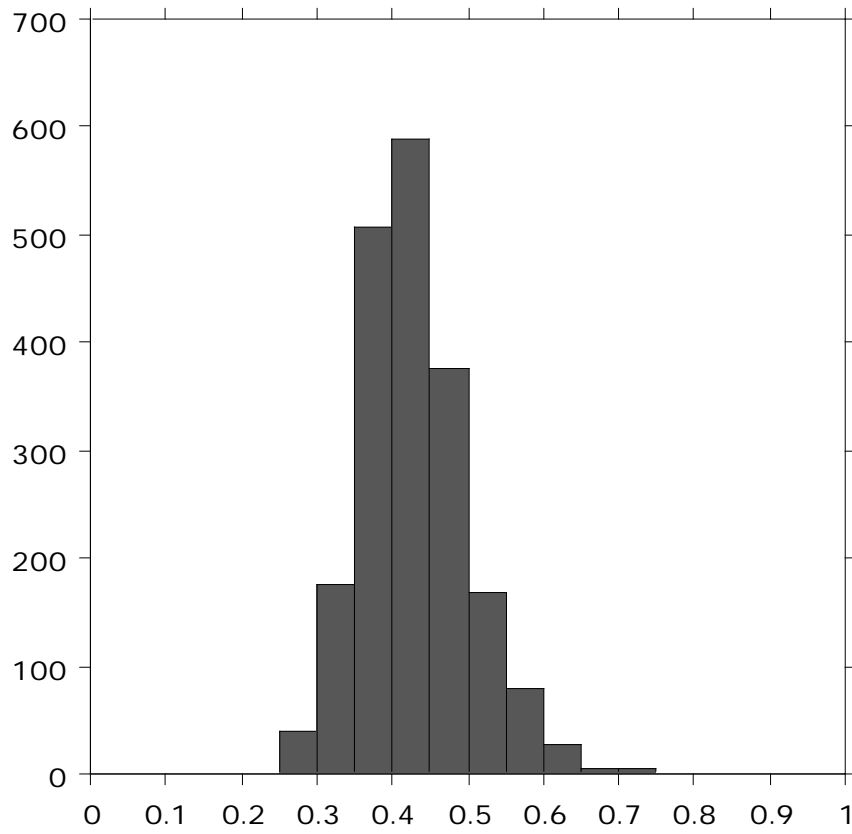

*Pyrococcus horikoshii*

P3

# CDS count

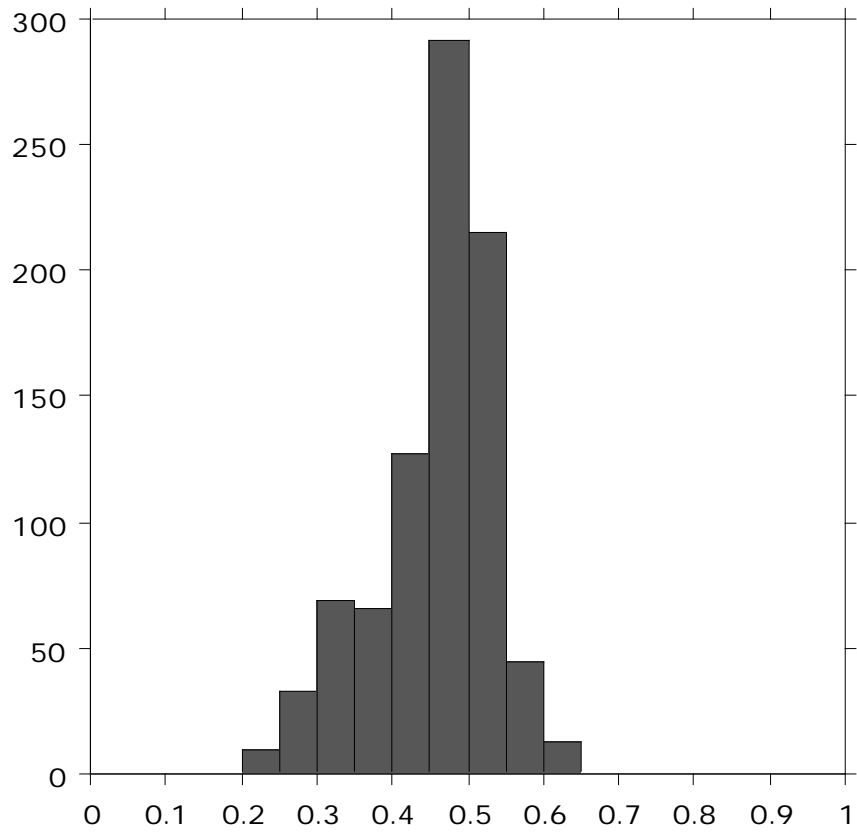

*Vibrio cholerae* chromosome 2

P3

# CDS count

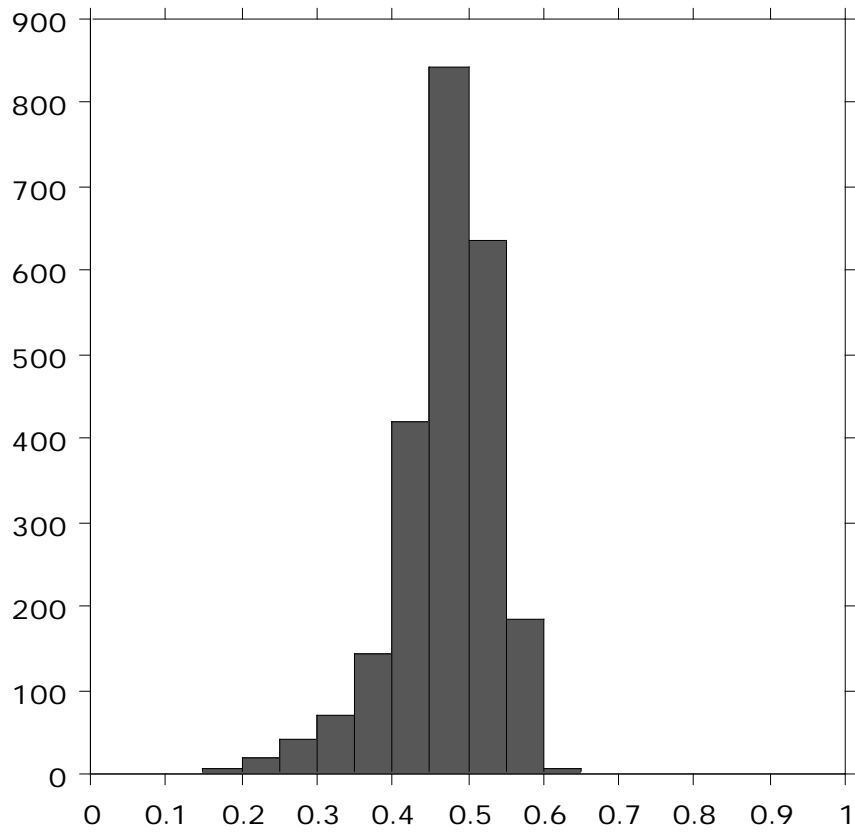

P3

*Vibrio cholerae* chromosome 1

# CDS count

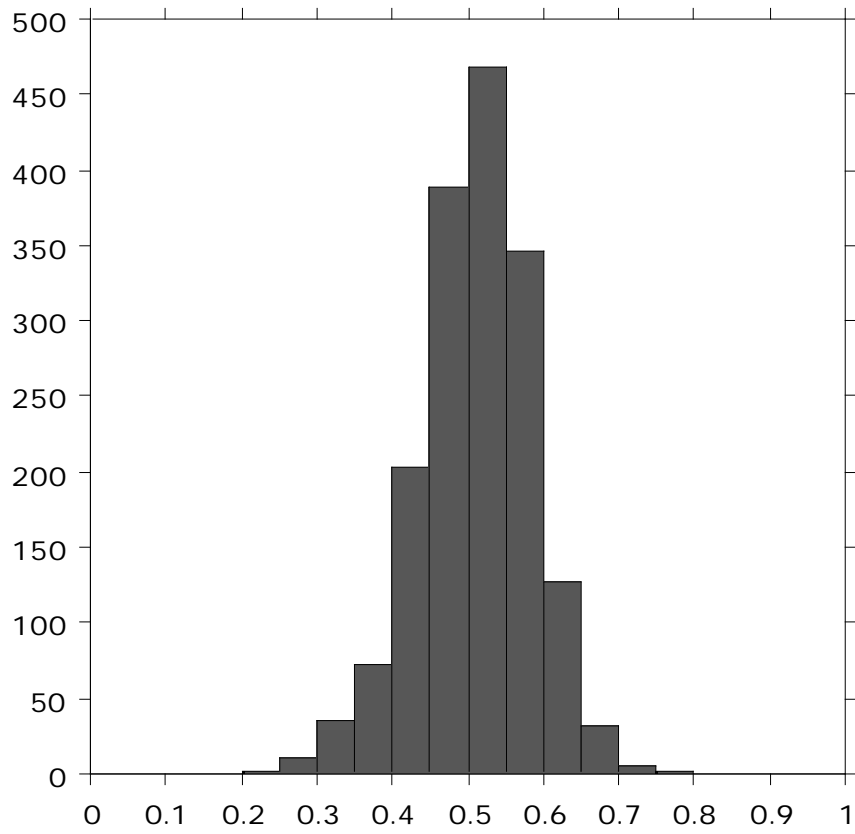

P3

*Pyrococcus abyssi*

# CDS count

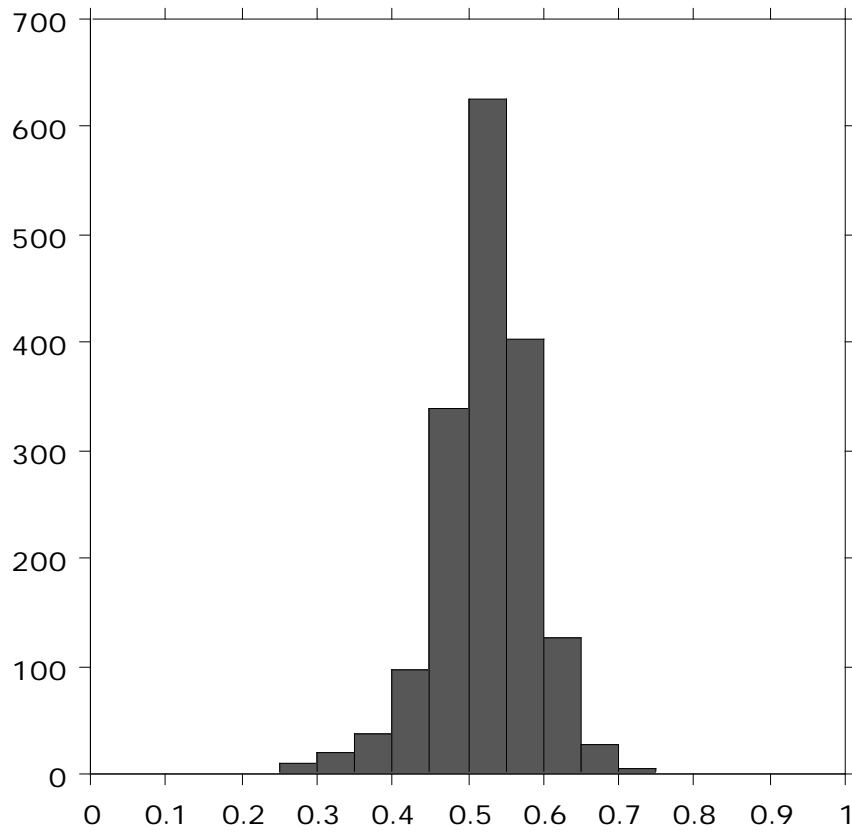

*Thermotoga maritima*

P3



# CDS count

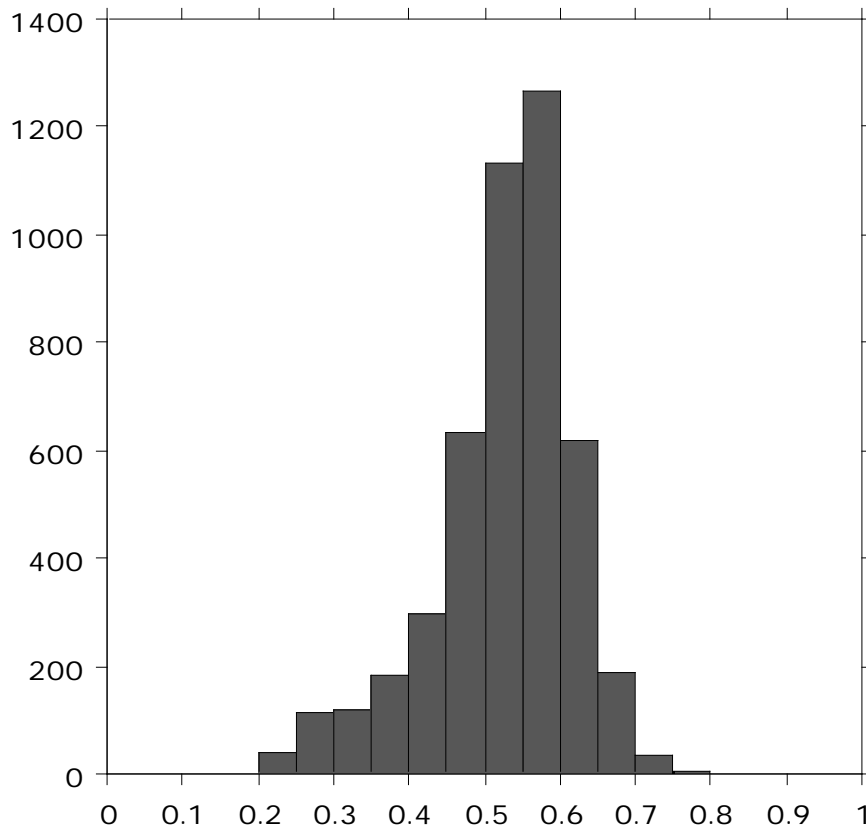

P3

*Escherichia coli* EDL933

# CDS count



P3

*Escherichia coli* RIMD 0509952

# CDS count

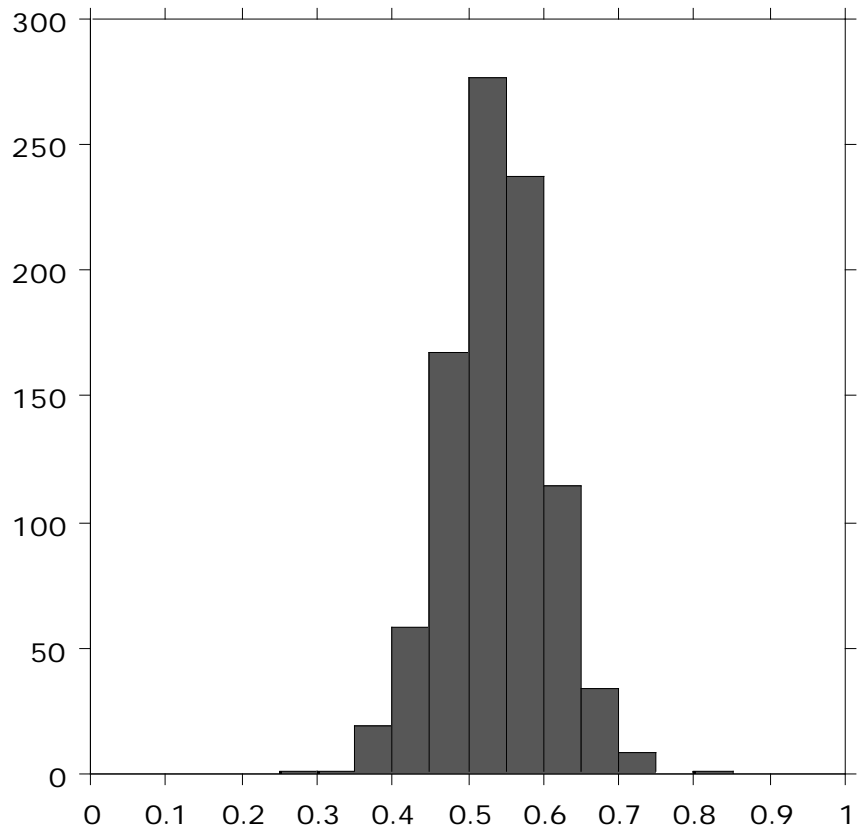

P3

*Treponema pallidum*

# CDS count

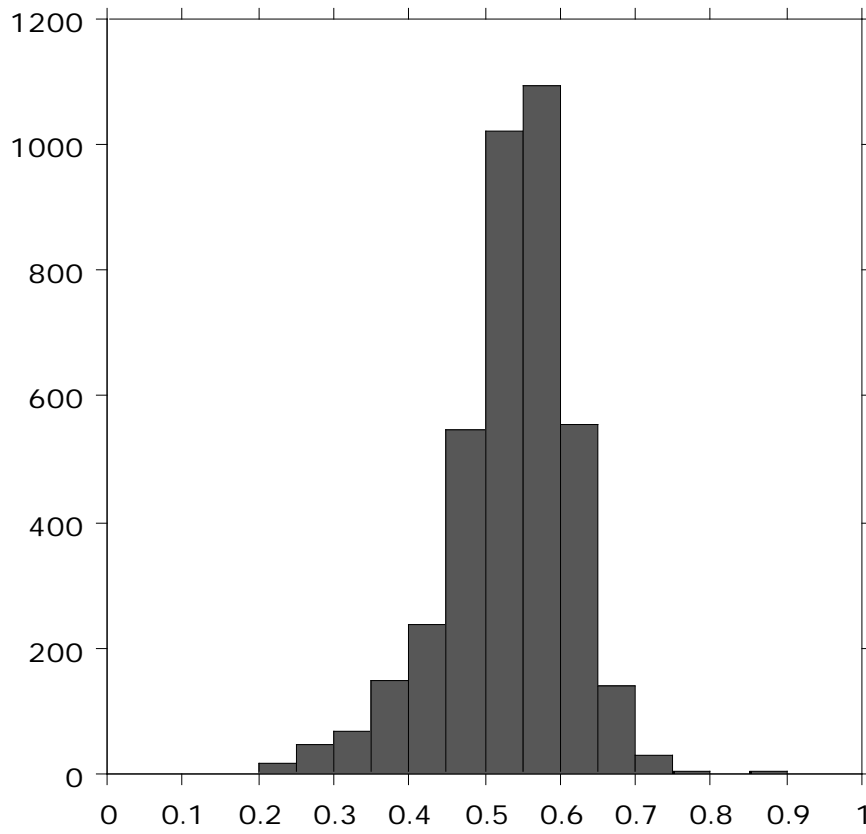

P3

*Escherichia coli* K-12

# CDS count

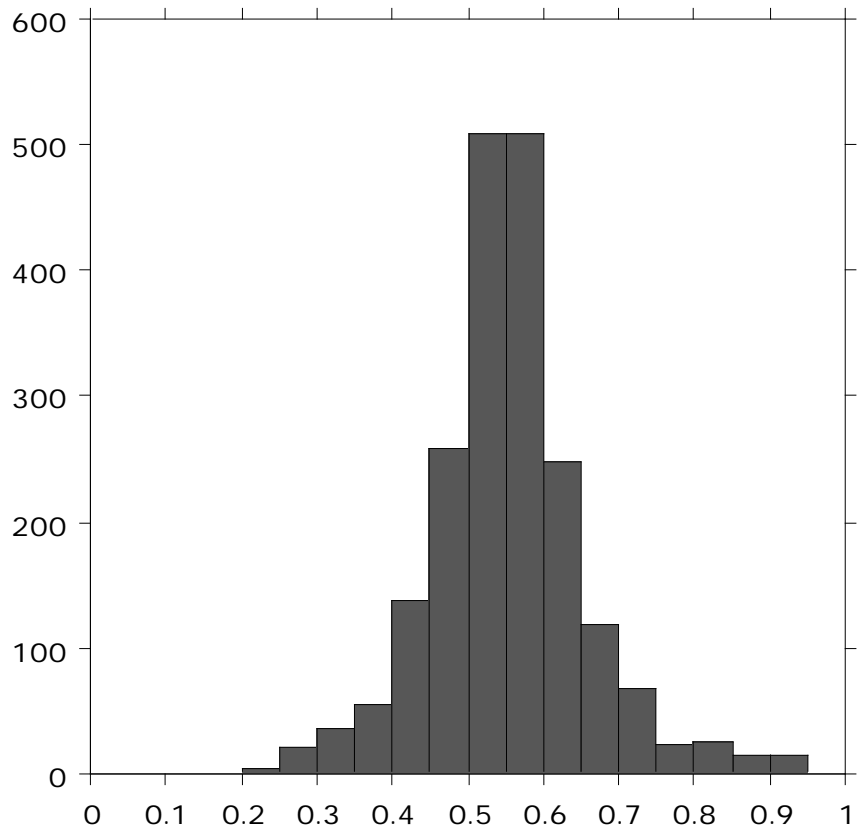

P3

*Xylella fastidiosa*

# CDS count

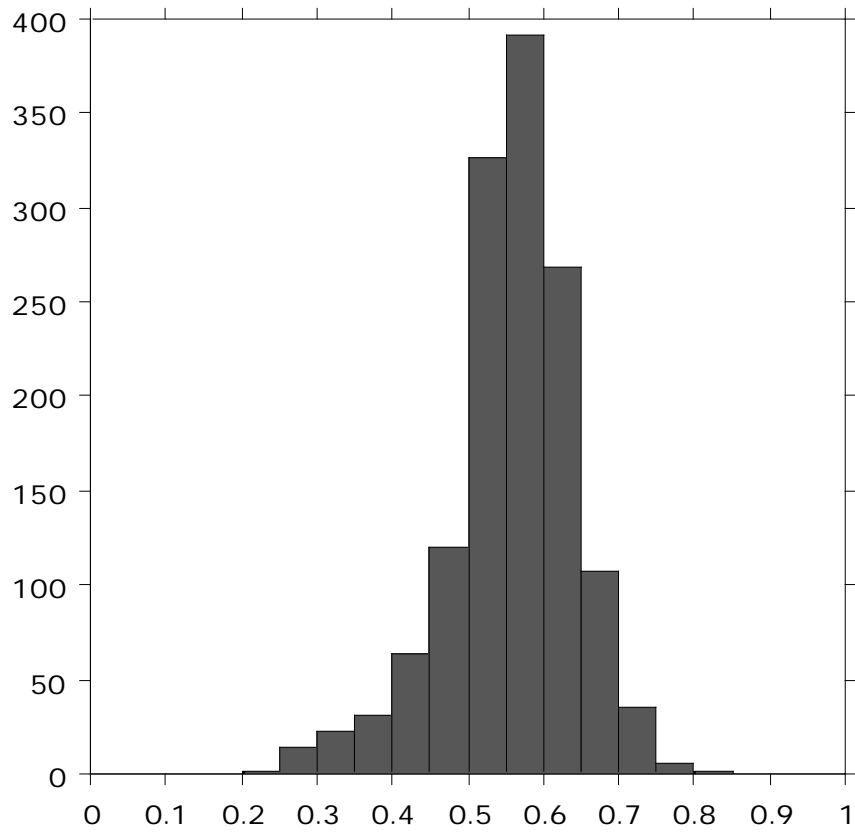

*Thermoplasma  
acidophilum*

P3

# CDS count

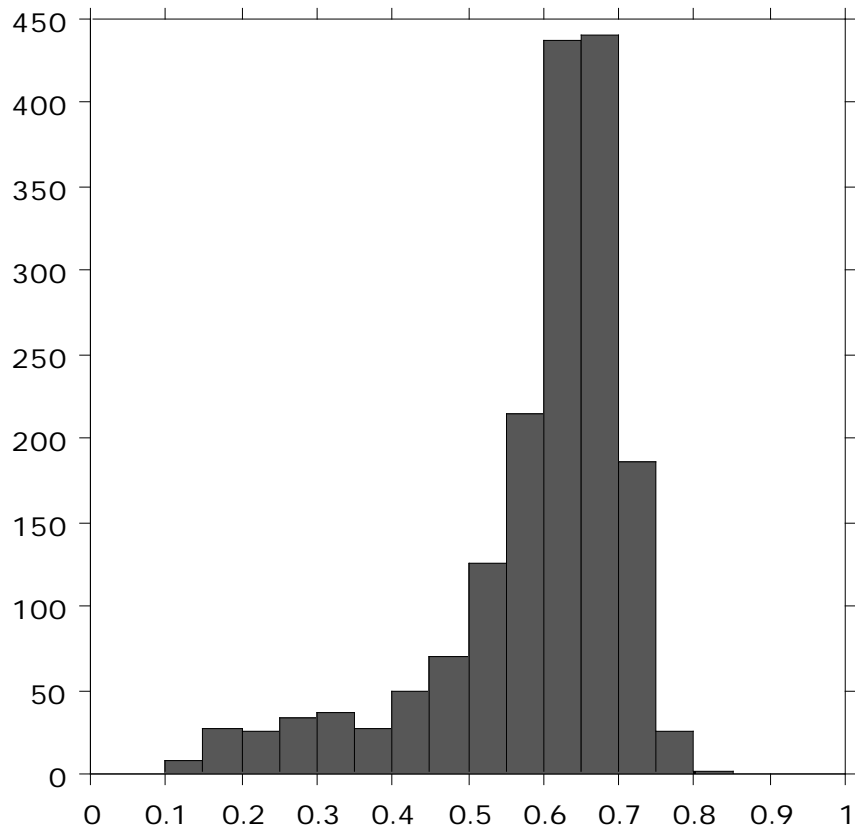

*Neisseria meningitidis* MC58 (B)

P3

# CDS count

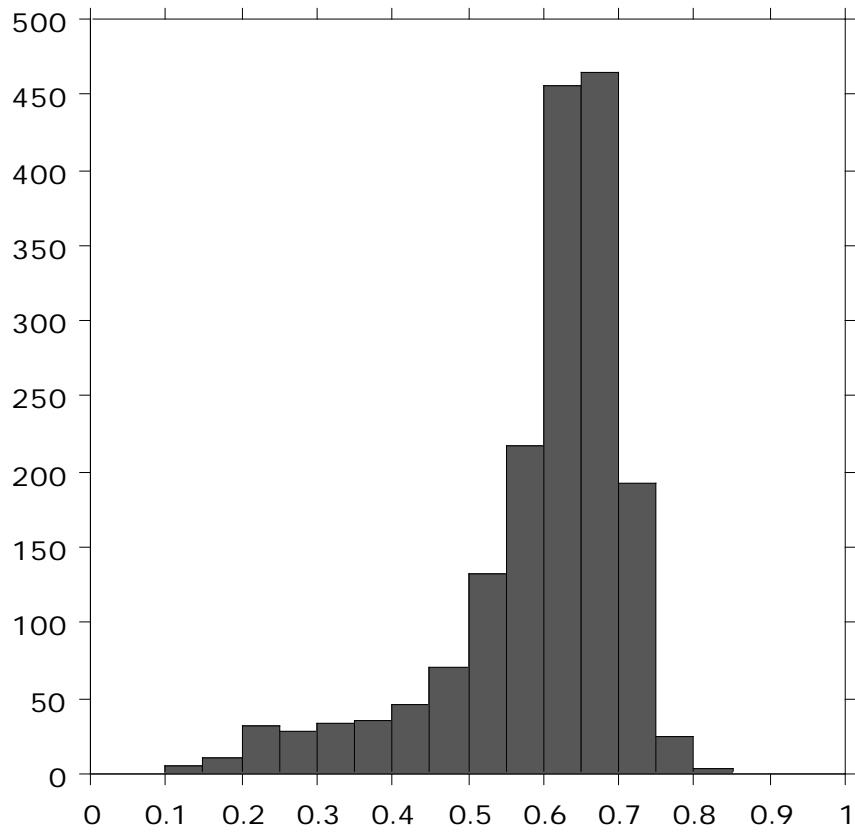

*Neisseria meningitidis* Z2491 (A)

P3



# CDS count

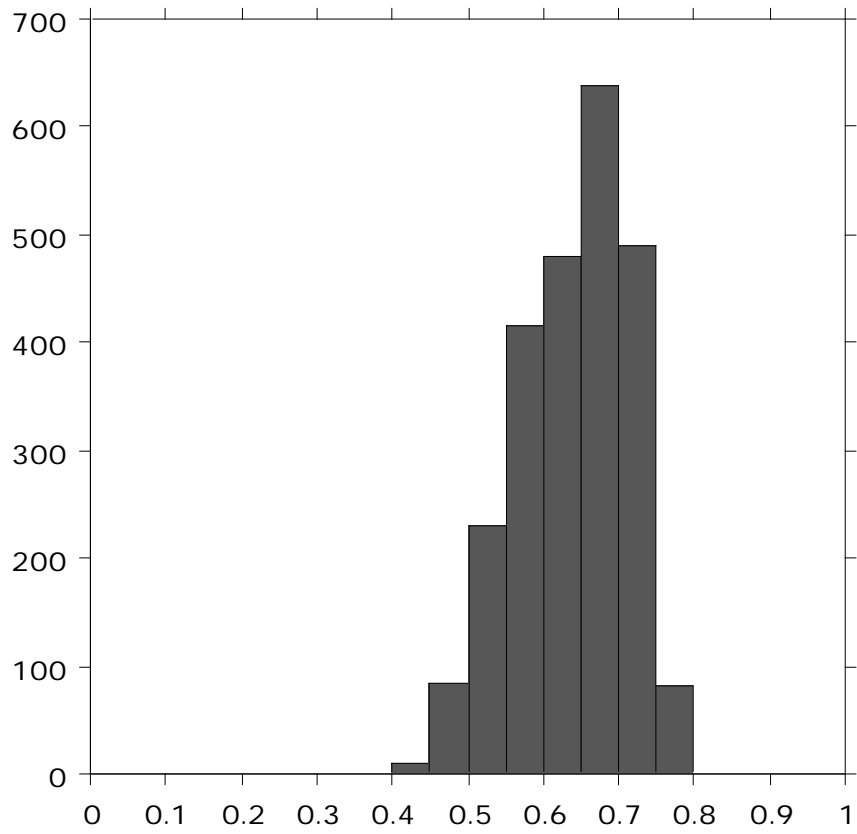

P3

*Mycobacterium leprae*

# CDS count

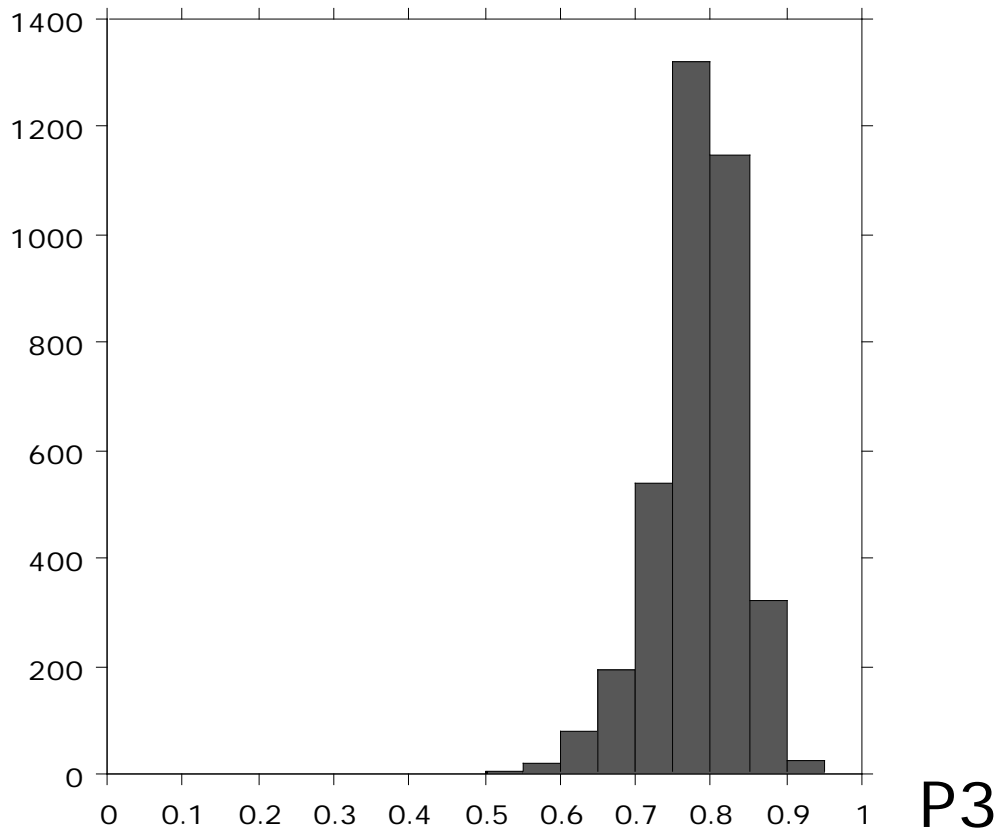

*Mycobacterium tuberculosis* CDC1551

# CDS count

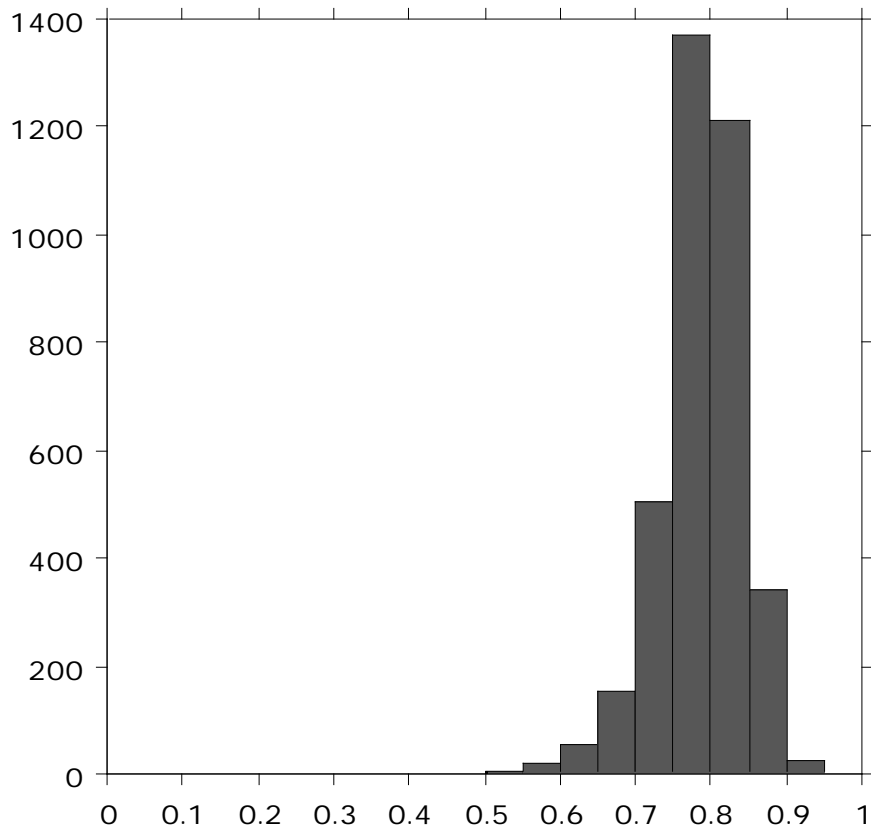

P3

*Mycobacterium tuberculosis* H37Rv

# CDS count

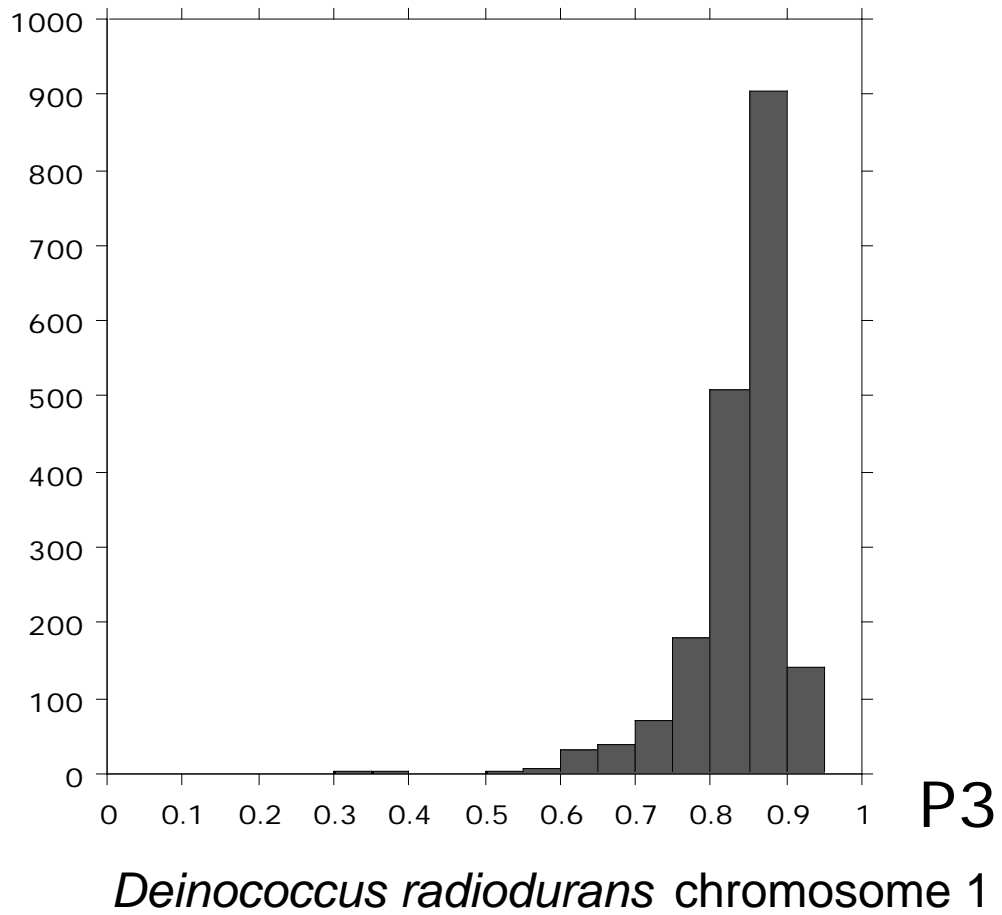

# CDS count

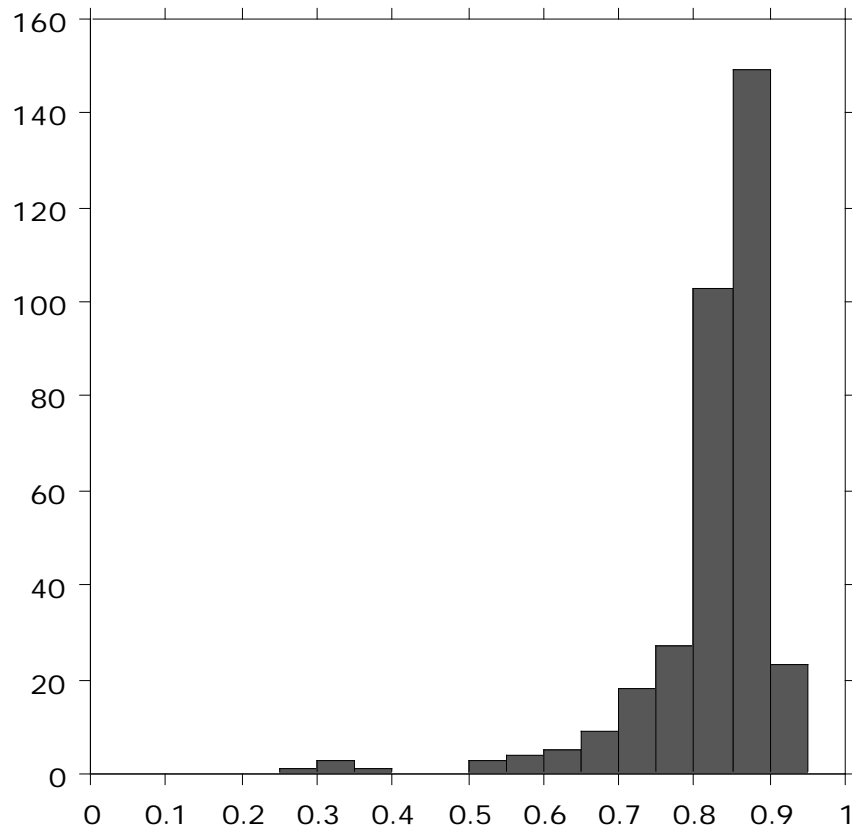

P3

*Deinococcus radiodurans* chromosome 2

# CDS count

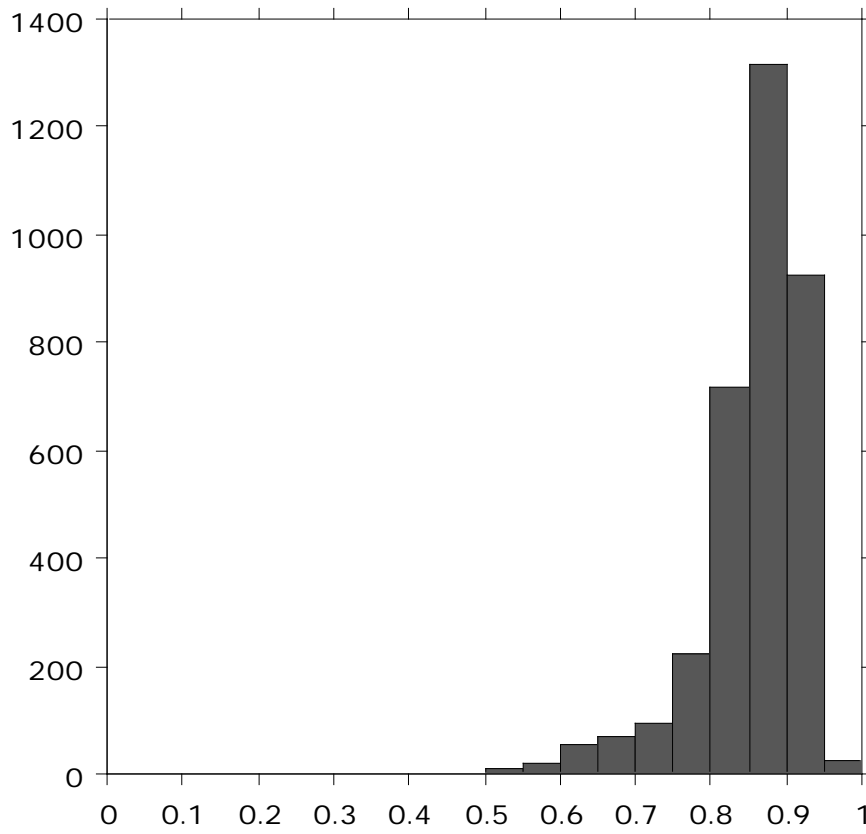

P3

*Caulobacter crescentus*

# CDS count

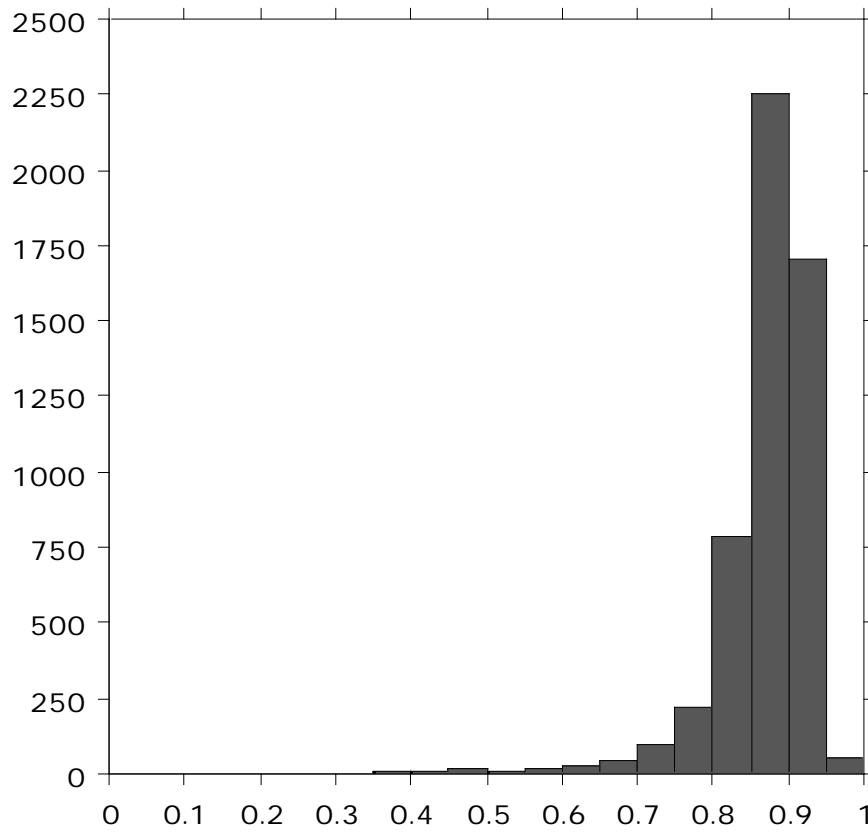

P3

*Pseudomonas aeruginosa*
